# Supplementary material for: Factors associated with interruption in treatment among pregnant and breastfeeding women living with HIV on ART in South Sudan
Source: BMC Public Health. 2026 Apr 15;26:1685. doi: 10.1186/s12889-026-27413-1 (PMC13200411; doi:10.1186/s12889-026-27413-1)
Supplement: Supplementary file 1 — Additional file 1: Data Used to replicate findings in the manuscript (XLSX 680 kb). [file 12889_2026_27413_MOESM1_ESM.xlsx]

## Sheet: Master_Data_base
dataabstractionid	ec_id	count	dateofabstraction	abstractedby	healthfacility	qa3_clientvillage2	dateofancregistration	qa2_age_atancregist2	nameofvillage	maritalstatus	qa4_maritalstatus2	mainoccupation	qa5_occupation2	qb1_clientpara2	qb2_clientgravida2	edd	gestationalageatancregistration	qb4_gestationalage2	entrytopmtct	qb5_typeofentry_to_pmtct2	numberofancvisits	numofancvisits_ec	qb6_numofanc_visit2	placeofdelivery	qb7_placeofdelivery2	deliveryoutcome	qb8_deliveryoutcome2	treatmentstatusandtiming	qb9_treatmtstatus_timing2	dateofartinitiation	n1stlineregimen	qb11_1stline_regimen2	n2ndlineregimen	firstvisitdate	pregbreastfeedingduring1stvisit	visit_1followupdate	proxydaysexpectedtobecoveredbyar	MMD-29-EC	MMD-29 Numeric-EC	ofdaysexpectedtobecoveredbyarvdi	ofdaysofartdispensedduring1stvis	daysnotcoverbyarv_visit1_fu2	vltestdoneduringfuvisit1_pbfw2	vltest_atfupvisit1_pbfw2	vlresults_atfupvisit1_pbfw2	vlsuppressionfuvisit1_pbfw2	visit_2visitdate	dayspastvisit_1_fup_apt	daysbetweenvisit_1andvisit_2_ec
36	IMPORTA-0001	1	2022-08-29	Tabu Alfred Mark	Yei Hospital	2	2021-08-17	33	Lomuku 2	Married Monogamous	2	Housewife	1	2	3	44621	8	1	Newly tested at ANC	1	3 visits	3	3	At Health Facility	1	Live Birth-LB	1	New on ART -- in pregnancy	2	2021-08-17	1c = TDF/3TC/DTG	3		2021-08-17	Pregnant	2021-11-17	92	3-5 months	2	90	90	0	No	2	NA	3	2021-11-17	0	92
37	IMPORTA-0002	1	2022-08-29	Tabu Alfred Mark	Yei Hospital	2	2021-04-22	34	Lomuku	Married Monogamous	2	Housewife	1	2	3		36	2	Known Pos on ART	2	3 visits	3	3	At Health Facility	1	Live Birth-LB	1	Already on ART	1	2019-04-10	1c = TDF/3TC/DTG	3		2021-06-22	Pregnant	2021-12-22	183	6+ months	3	180	180	0	No	2	NA	3	2021-12-22	0	183
38	IMPORTA-0003	1	2022-08-29	Tabu Alfred Mark	Yei Hospital	2	2021-06-11	21	Hai Leben	Married Polygamous	2	Housewife	1	1	2	44562			Newly tested at ANC	1	3 visits	3	3	At Health Facility	1	Live Birth-LB	1			2021-06-11	1c = TDF/3TC/DTG	3		2021-06-11	Pregnant	2021-12-11	183	6+ months	3	180	180	0	No	2	NA	3	2021-12-09	-2	181
39	IMPORTA-0004	1	2022-08-29	Tabu Alfred Mark	Yei Hospital	2	2021-07-19	19	Hai Dem	Married Monogamous	2	Housewife	1	1	2		18	2	Known Pos on ART	2	3 visits	3	3	At Health Facility	1	Live Birth-LB	1	Already on ART	1	2020-01-10	1f = TDF/3TC/EFV	6		2021-07-19	Pregnant	2022-01-19	184	6+ months	3	180	180	0	Yes	1	Suppressed	1	2022-01-21	2	186
40	IMPORTA-0005	1	2022-08-29	Tabu Alfred Mark	Yei Hospital	2	2021-05-26	28	Gabat	Married Monogamous	2	Housewife	1	1	2				Newly tested at ANC	1	3 visits	3	3	At home	2	Live Birth-LB	1	New on ART -- in pregnancy	2	2021-05-26	1c = TDF/3TC/DTG	3		2021-05-26	Pregnant	2021-11-26	184	6+ months	3	180	180	0	No	2	NA	3	2021-11-11	-15	169
41	IMPORTA-0006	1	2022-08-29	Tabu Alfred Mark	Yei Hospital	2	2021-02-17	32	TTC	Married Monogamous	2			2	3		36	2	Known Pos on ART	2				At home	2	Live Birth-LB	1	Already on ART	1	2020-10-10	1c = TDF/3TC/DTG	3		2021-02-17	Pregnant	2021-08-17	181	6+ months	3	180	180	0	No	2	NA	3	2021-08-17	0	181
42	IMPORTA-0007	1	2022-08-29	Tabu Alfred Mark	Yei Hospital	2	2021-03-22	20	TTC	Married Monogamous	2	Housewife	1	1	1	44529			Newly tested at ANC	1	3 visits	3	3	At Health Facility	1	Live Birth-LB	1	New on ART -- in pregnancy	2	2021-03-22	1c = TDF/3TC/DTG	3		2021-03-22	Pregnant	2021-09-22	184	6+ months	3	180	180	0	No	2	NA	3	2021-09-22	0	184
43	IMPORTA-0008	1	2022-08-29	Tabu Alfred Mark	Yei Hospital	2	2021-01-18	18	Loparata	Married Monogamous	2	Housewife	1	1	2		18	2	Known Pos on ART	2	1 visit	1	1	At Health Facility	1	Live Birth-LB	1	Already on ART	1	2020-11-30	1c = TDF/3TC/DTG	3		2021-01-18	Pregnant	2021-06-18	151	3-5 months	2	180	180	0	Yes	1	Suppressed	1	2021-06-21	3	154
44	IMPORTA-0009	1	2022-08-29	Tabu Alfred Mark	Yei Hospital	2	2022-02-22	24	Goli	Married Monogamous	2	Housewife	1	1	1				Newly tested at ANC	1	1 visit	1	1	At home	2	Live Birth-LB	1	New on ART -- in pregnancy	2	2022-02-22	1c = TDF/3TC/DTG	3		2022-02-22	Pregnant	2022-07-22	150	3-5 months	2	180	180	0	No	2	NA	3	2022-08-28	37	187
45	IMPORTA-0010	1	2022-08-30	Tabu Alfred Mark	Yei Hospital	2	2020-12-18	22	Gabat	Married Monogamous	2	Housewife	1	2	3	44352	28	2	Known Pos on ART	2	1 visit	1	1	At home	2	Live Birth-LB	1	Already on ART	1	2018-01-02	1f = TDF/3TC/EFV	6		2020-12-18	Pregnant	2021-06-18	182	6+ months	3	180	180	0	Yes	1	Suppressed	1	2021-06-18	0	182
46	IMPORTA-0011	1	2022-08-29	Tabu Alfred Mark	Yei Hospital	2	2021-05-20	30	TTC	Married Monogamous	2	Housewife	1	2	3		28	2	Known Pos on ART	2	1 visit	1	1	At Health Facility	1	Live Birth-LB	1	Already on ART	1	2020-10-06	1f = TDF/3TC/EFV	6		2021-05-20	Pregnant	2021-11-19	183	6+ months	3	180	180	0	Yes	1	Suppressed	1	2022-01-14	56	239
47	IMPORTA-0012	1	2022-08-29	Tabu Alfred Mark	Yei Hospital	2	2021-07-13	36	Gabat	Married Monogamous	2	Housewife	1	2	3		32	2	Known Pos on ART	2	1 visit	1	1	At Health Facility	1	Live Birth-LB	1	Already on ART	1	2020-10-10	1f = TDF/3TC/EFV	6		2021-01-13	Pregnant	2021-07-13	181	6+ months	3	180	180	0	Yes	1	Suppressed	1	2021-05-12	-62	119
49	IMPORTA-0014	1	2022-08-29	Tabu Alfred Mark	Yei Hospital	2	2021-09-14	21	Hai Tarawa	Married Monogamous	2	Housewife	1	2	3	44743	18	2	Newly tested at ANC	1	1 visit	1	1	At home	2	Live Birth-LB	1	New on ART -- in pregnancy	2	2021-09-14	1c = TDF/3TC/DTG	3		2021-09-14	Pregnant	2022-03-14	181	6+ months	3	180	180	0	No	2	NA	3	2022-03-09	-5	176
50	IMPORTA-0015	1	2022-08-29	Tabu Alfred Mark	Yei Hospital	2	2021-06-02	30	Gabat	Married Monogamous	2	Housewife	1	2	3				Known Pos on ART	2	1 visit	1	1	At Health Facility	1	Live Birth-LB	1	Already on ART	1	2020-02-10	1c = TDF/3TC/DTG	3		2021-06-02	Pregnant	2021-12-02	183	6+ months	3	180	180	0	Yes	1	Suppressed	1	2021-12-10	8	191
51	IMPORTA-0016	1	2022-08-29	Tabu Alfred Mark	Yei Hospital	2	2020-12-03	31	Gabat	Married Monogamous	2	Housewife	1	2	3				Known Pos on ART	2	1 visit	1	1	At Health Facility	1	Live Birth-LB	1	Already on ART	1	2017-02-23	1f = TDF/3TC/EFV	6		2020-12-03	Pregnant	2021-05-03	151	3-5 months	2	180	180	0	Yes	1	Suppressed	1	2021-05-17	14	165
52	IMPORTA-0017	1	2022-08-29	Tabu Alfred Mark	Yei Hospital	2	2020-12-16	30	Hai Tarawa	Married Monogamous	2	Housewife	1	3	3	44348	12	1	Known Pos on ART	2	1 visit	1	1	At Health Facility	1	Live Birth-LB	1	Already on ART	1	2019-12-18	1c = TDF/3TC/DTG	3		2020-12-16	Pregnant	2021-06-27	193	6+ months	3	180	180	0	Yes	1	Suppressed	1	2021-06-17	-10	183
53	IMPORTA-0018	1	2022-08-29	Tabu Alfred Mark	Yei Hospital	2	2020-09-08	30	Hai Dem	Married Monogamous	2	Housewife	1	2	3		8	1	Known Pos on ART	2	2 visits	2	2	At home	2	Live Birth-LB	1	Already on ART	1	2013-01-01	1e = AZT/3TC+DTG	5		2020-09-08	Pregnant	2021-03-06	179	3-5 months	2	180	180	0	No	2	NA	3	2021-03-06	0	179
54	IMPORTA-0019	1	2022-08-29	Tabu Alfred Mark	Yei Hospital	2	2020-08-19	23	Hai Tarawa	Married Monogamous	2	Housewife	1	2	3	44228	20	2	Newly tested at ANC	1	1 visit	1	1	At home	2	Live Birth-LB	1	New on ART -- in pregnancy	2	2020-08-19	1c = TDF/3TC/DTG	3		2020-08-19	Pregnant	2021-02-18	183	6+ months	3	180	180	0	No	2	NA	3	2021-03-30	40	223
55	IMPORTA-0020	1	2022-08-29	Tabu Alfred Mark	Yei Hospital	2	2020-08-18	29	Lomuku	Married Monogamous	2	Housewife	1	1	2	44197	18	2	Known Pos on ART	2	2 visits	2	2	At Health Facility	1	Live Birth-LB	1	Already on ART	1	2019-01-09	1f = TDF/3TC/EFV	6		2020-08-18	Pregnant	2021-02-18	184	6+ months	3	180	180	0	Yes	1	Suppressed	1	2021-02-18	0	184
56	IMPORTA-0021	1	2022-08-29	Tabu Alfred Mark	Yei Hospital	2	2020-05-11	23	Hai Leben	Married Monogamous	2	Housewife	1	1	2		8	1	Known Pos on ART	2				At Health Facility	1	Live Birth-LB	1	Already on ART	1	2018-10-01	1f = TDF/3TC/EFV	6		2020-05-11	Pregnant	2020-11-13	186	6+ months	3	180	180	0	Yes	1	Suppressed	1	2020-11-23	10	196
57	IMPORTA-0022	1	2022-08-29	Tabu Alfred Mark	Yei Hospital	2	2020-09-14	33	Gabat	Married Monogamous	2	Housewife	1	2	3	44348			Known Pos on ART	2	1 visit	1	1	At Health Facility	1	Live Birth-LB	1	Already on ART	1	2014-02-27	1f = TDF/3TC/EFV	6		2020-09-14	Pregnant	2021-03-22	189	6+ months	3	180	180	0	Yes	1	Suppressed	1	2021-03-23	1	190
58	IMPORTA-0023	1	2022-08-29	Tabu Alfred Mark	Yei Hospital	2	2020-08-06	23	Hai Peace	Married Monogamous	2	Housewife	1	1	2		18	2	Known Pos on ART	2	1 visit	1	1	At Health Facility	1	Live Birth-LB	1	Already on ART	1	2017-11-07	1c = TDF/3TC/DTG	3		2020-08-06	Pregnant	2021-02-03	181	6+ months	3	180	180	0	No	2	NA	3	2021-02-11	8	189
59	IMPORTA-0024	1	2022-08-29	Tabu Alfred Mark	Yei Hospital	2	2020-09-30	28	Lomuku	Married Monogamous	2	Housewife	1	2	3				Known Pos on ART	2	1 visit	1	1	At Health Facility	1	Live Birth-LB	1	Already on ART	1	2017-02-28	1f = TDF/3TC/EFV	6		2020-09-30	Pregnant	2021-03-30	181	6+ months	3	180	180	0	No	2	NA	3	2021-04-06	7	188
60	IMPORTA-0025	1	2022-08-29	Tabu Alfred Mark	Yei Hospital	2	2020-11-16			Married Monogamous	2	Housewife	1	1	2		18	2	Known Pos on ART	2	1 visit	1	1	At home	2	Live Birth-LB	1	Already on ART	1	2019-01-17	1f = TDF/3TC/EFV	6		2020-11-16	Pregnant	2021-05-13	178	3-5 months	2	180	180	0	Yes	1	Suppressed	1	2021-05-07	-6	172
61	IMPORTA-0026	1	2022-08-29	Tabu Alfred Mark	Yei Hospital	2	2021-01-06	33	Dar es Salam	Married Monogamous	2	Unemployed	1	1	2	44304	18	2	Newly tested at ANC	1	1 visit	1	1	At Health Facility	1	Live Birth-LB	1	New on ART -- in pregnancy	2	2021-01-06	1c = TDF/3TC/DTG	3		2021-01-06	Pregnant	2021-07-05	180	6+ months	3	180	180	0	No	2	NA	3	2021-07-19	14	194
61	IMPORTA-0027	1	2022-08-29	Tabu Alfred Mark	Yei Hospital	2	2020-08-25	19	Tarawa	Married Monogamous	2	Housewife	1	2	3		11	1	Newly tested at ANC	1	1 visit	1	1	At Health Facility	1	Live Birth-LB	1	New on ART -- in pregnancy	2	2020-08-25	1c = TDF/3TC/DTG	3		2020-08-26	Pregnant	2021-02-24	182	6+ months	3	180	180	0	No	2	NA	3	2021-09-21	209	391
63	IMPORTA-0028	1	2022-08-30	Tabu Alfred Mark	Yei Hospital	2	2021-04-08	25	Hai Tarawa	Married Monogamous	2	Housewife	1	2	3	44507	18	2	Known Pos on ART	2	1 visit	1	1	At Health Facility	1	Live Birth-LB	1	Already on ART	1	2020-12-15	1e = AZT/3TC+DTG	5		2021-04-08	Pregnant	2021-10-06	181	6+ months	3	180	180	0	No	2	NA	3	2021-10-06	0	181
64	IMPORTA-0029	1	2022-08-30	Tabu Alfred Mark	Yei Hospital	2	2021-10-13	26	Hai Tarawa	Married Monogamous	2	Housewife	1	3	3	44658			Known Pos on ART	2				At Health Facility	1	Live Birth-LB	1	Already on ART	1	2013-01-10	1f = TDF/3TC/EFV	6		2021-10-13	Pregnant	2022-04-13	182	6+ months	3	180	180	0	Yes	1	Suppressed	1	2022-04-19	6	188
65	IMPORTA-0030	1	2022-08-30	Tabu Alfred Mark	Yei Hospital	2	2021-03-23	28	Hai peace	Married Monogamous	2	Housewife	1	1	2	44531			Known Pos on ART	2	1 visit	1	1	At Health Facility	1	Live Birth-LB	1	Already on ART	1	2020-01-17	1c = TDF/3TC/DTG	3		2021-03-23	Pregnant	2021-09-23	184	6+ months	3	180	180	0	Yes	1	Suppressed	1	2021-09-23	0	184
66	IMPORTA-0031	1	2022-08-30	Tabu Alfred Mark	Yei Hospital	2	2021-07-19	22	Hai peace	Married Monogamous	2	Housewife	1	2	3	44604	18	2	Known Pos on ART	2	2 visits	2	2	At Health Facility	1	Live Birth-LB	1	Already on ART	1	2018-02-15	1f = TDF/3TC/EFV	6		2021-07-19	Pregnant	2022-01-19	184	6+ months	3	180	180	0	No	2	NA	3	2022-01-20	1	185
67	IMPORTA-0032	1	2022-08-29	Tabu Alfred Mark	Yei Hospital	2				Married Monogamous	2	Housewife	1	2	3		18	2	Known Pos on ART	2	1 visit	1	1	At Health Facility	1	Live Birth-LB	1	Already on ART	1	2013-01-10	1f = TDF/3TC/EFV	6		2020-12-17	Pregnant	2021-05-15	149	3-5 months	2	180	180	0	Yes	1	Suppressed	1	2021-05-25	10	159
68	IMPORTA-0033	1	2022-08-31	Tabu Alfred Mark	Yei Hospital	2	2019-10-16	34	Gabat	Married Monogamous	2	Other Uniformed forces (Police, Wildlife, Prisons, Fire Brigade)	2	3	3	43779	34	2	Known Pos on ART	2	1 visit	1	1	At Health Facility	1	Live Birth-LB	1	Already on ART	1	2014-08-06	1f = TDF/3TC/EFV	6		2019-04-29	Pregnant	2019-07-29	91	3-5 months	2	90	90	0	No	2	NA	3	2019-12-09	133	224
69	IMPORTA-0034	1	2022-08-31	Tabu Alfred Mark	Yei Hospital	2	2019-11-06	28	Lomuku 2	Married Polygamous	2	Other Uniformed forces (Police, Wildlife, Prisons, Fire Brigade)	2	3	3	43812	24	2	Known Pos on ART	2	1 visit	1	1	At Health Facility	1	Live Birth-LB	1	Already on ART	1	2017-09-06	1f = TDF/3TC/EFV	6		2019-05-17	Pregnant	2019-11-12	179	3-5 months	2	180	180	0	No	2	NA	3	2019-11-12	0	179
70	IMPORTA-0035	1	2022-08-31	Tabu Alfred Mark	Yei Hospital	2	2020-05-04	33	Zezira	Married Monogamous	2	Student	1	3	3	43951	36	2	Known Pos on ART	2	1 visit	1	1	At Health Facility	1	Live Birth-LB	1	Already on ART	1	2013-09-13	1f = TDF/3TC/EFV	6		2020-03-26	Pregnant	2020-09-25	183	6+ months	3	180	180	0	No	2	NA	3	2020-09-18	-7	176
71	IMPORTA-0036	1	2022-08-31	Tabu Alfred Mark	Yei Hospital	2	2020-03-06	32	Leben	Married Monogamous	2	Housewife	1	3	3	43891	12	1	Known Pos on ART	2	2 visits	2	2	At Health Facility	1	Live Birth-LB	1	Already on ART	1	2007-11-16	1f = TDF/3TC/EFV	6		2020-05-23	Pregnant	2020-10-22	152	3-5 months	2	180	180	0	Yes	1	Suppressed	1	2020-10-22	0	152
1	IMPORTA-0037	1	2022-08-31	Tabu Alfred Mark	Yei Hospital	2	2020-06-19	20	Hai leben	Married Monogamous	2	Housewife	1	1	2	44090	26	2	Known Pos on ART	2	1 visit	1	1	At Health Facility	1	Live Birth-LB	1	Already on ART	1	2017-10-02	1f = TDF/3TC/EFV	6		2020-06-19	Pregnant	2020-12-19	183	6+ months	3	180	180	0	Yes	1	Suppressed	1	2020-12-19	0	183
2	IMPORTA-0038	1	2022-08-31	Tabu Alfred Mark	Yei Hospital	2	2020-07-03	23	Mahad	Married Monogamous	2	Housewife	1	2	3	44220	12	1	Known Pos on ART	2	1 visit	1	1	At Health Facility	1	Live Birth-LB	1	Already on ART	1	2016-04-28	1f = TDF/3TC/EFV	6		2020-06-19	Pregnant	2020-12-18	182	6+ months	3	180	180	0	Yes	1	Suppressed	1	2020-12-28	10	192
3	IMPORTA-0039	1	2022-08-31	Tabu Alfred Mark	Yei Hospital	2	2020-06-03	28	Ronyi	Married Monogamous	2	Housewife	1	2	3	44105	20	2	Known Pos on ART	2	4 or more visits	4	3	At Health Facility	1	Live Birth-LB	1	Already on ART	1	2019-07-17	1f = TDF/3TC/EFV	6		2020-06-03	Pregnant	2020-12-03	183	6+ months	3	180	180	0	Yes	1	Suppressed	1	2020-12-03	0	183
4	IMPORTA-0040	1	2022-08-31	Tabu Alfred Mark	Yei Hospital	2	2020-06-19	28	Kanjoro	Married Monogamous	2	Housewife	1	1	2	44107	18	2	Known Pos on ART	2	1 visit	1	1	At Health Facility	1	Live Birth-LB	1	Already on ART	1	2019-10-19	1f = TDF/3TC/EFV	6		2020-06-19	Pregnant	2020-12-19	183	6+ months	3	180	180	0	Yes	1	Suppressed	1	2020-12-19	0	183
5	IMPORTA-0042	1	2022-08-31	Tabu Alfred Mark	Yei Hospital	2	2020-04-07	30	Ilimoko	Married Monogamous	2	Housewife	1	1	2	44081	16	2	Known Pos on ART	2	1 visit	1	1	At Health Facility	1	Live Birth-LB	1	Already on ART	1	2016-06-06	1f = TDF/3TC/EFV	6		2020-03-25	Pregnant	2020-09-24	183	6+ months	3	180	180	0	Yes	1	Suppressed	1	2020-09-16	-8	175
6	IMPORTA-0043	1	2022-08-31	Tabu Alfred Mark	Yei Hospital	2	2020-03-18	33	Erap	Married Monogamous	2	Housewife	1	3	3	43897			Known Pos on ART	2	1 visit	1	1	At Health Facility	1	Live Birth-LB	1	New on ART -- in pregnancy	2	2014-10-22	1e = AZT/3TC+DTG	5		2020-01-03	Pregnant	2020-05-04	122	3-5 months	2	120	120	0	No	2	NA	3	2020-05-04	0	122
7	IMPORTA-0044	1	2022-08-31	Tabu Alfred Mark	Yei Hospital	2	2019-12-19	29	Hai Gabat	Married Polygamous	2	Other Uniformed forces (Police, Wildlife, Prisons, Fire Brigade)	2	2	3	43903	28	2	Newly tested at ANC	1	1 visit	1	1	At Health Facility	1	Live Birth-LB	1	Already on ART	1	2011-06-03	1f = TDF/3TC/EFV	6		2019-12-17	Pregnant	2020-03-16	90	3-5 months	2	180	180	0	Yes	1	Suppressed	1	2020-03-19	3	93
8	IMPORTA-0045	1	2022-08-31	Tabu Alfred Mark	Yei Hospital	2	2021-04-30	22	Zamia	Married Monogamous	2	Housewife	1	1	2	43862	20	2	Known Pos on ART	2	3 visits	3	3	At Health Facility	1	Live Birth-LB	1	Already on ART	1	2019-10-07	1e = AZT/3TC+DTG	5		2021-04-30	Pregnant	2021-10-29	182	6+ months	3	180	180	0	No	2	NA	3	2021-11-30	32	214
10	IMPORTA-0047	1	2022-08-29	Tabu Alfred Mark	Yei Hospital	2	2021-02-26	26	Hai peace	Married Monogamous	2	Housewife	1	2	3	44501	8	1	Newly tested at ANC	1	1 visit	1	1	At Health Facility	1	Live Birth-LB	1	New on ART -- in pregnancy	2	2021-02-26	1c = TDF/3TC/DTG	3		2021-02-26	Pregnant	2021-08-26	181	6+ months	3	180	180	0	No	2	NA	3	2021-09-07	12	193
11	IMPORTA-0048	1	2022-08-29	Tabu Alfred Mark	Yei Hospital	2	2021-02-23	28	Mahad	Married Monogamous	2	Housewife	1	2	3	44501	32	2	Newly tested at ANC	1	3 visits	3	3	At Health Facility	1	Live Birth-LB	1	New on ART -- in pregnancy	2	2021-02-23	1c = TDF/3TC/DTG	3		2021-02-23	Pregnant	2021-08-23	181	6+ months	3	180	180	0	Yes	1	Suppressed	1	2021-08-20	-3	178
12	IMPORTA-0049	1	2022-08-29	Tabu Alfred Mark	Yei Hospital	2	2021-02-16	29		Married Monogamous	2	Housewife	1	2	3	44501			Newly tested at ANC	1	1 visit	1	1	At Health Facility	1	Live Birth-LB	1	New on ART -- in pregnancy	2	2021-02-16	1c = TDF/3TC/DTG	3		2021-02-16	Pregnant	2021-08-15	180	6+ months	3	180	180	0	No	2	NA	3	2021-08-16	1	181
13	IMPORTA-0050	1	2022-08-29	Tabu Alfred Mark	Yei Hospital	2	2021-08-13	30	Dar es Salam	Married Monogamous	2	Housewife	1	2	3		12	1	Known Pos on ART	2	3 visits	3	3	At Health Facility	1	Live Birth-LB	1	Already on ART	1	2021-01-10	1f = TDF/3TC/EFV	6		2021-08-13	Pregnant	2022-02-10	181	6+ months	3	180	180	0	Yes	1	Suppressed	1	2022-02-14	4	185
14	IMPORTA-0051	1	2022-08-30	Tabu Alfred Mark	Yei Hospital	2	2021-08-18	34	Dilliwoko	Married Polygamous	2	Other Uniformed forces (Police, Wildlife, Prisons, Fire Brigade)	2	2	3	44713			Known Pos on ART	2	2 visits	2	2	At home	2	Live Birth-LB	1	Already on ART	1	2021-01-01	1f = TDF/3TC/EFV	6		2021-10-18	Pregnant	2022-04-18	182	6+ months	3	180	180	0	No	2	NA	3	2022-02-19	-58	124
15	IMPORTA-0052	1	2022-08-29	Tabu Alfred Mark	Yei Hospital	2	2021-11-18	27	Gabat	Married Monogamous	2	Housewife	1	2	3		18	2	Known Pos on ART	2	2 visits	2	2	At home	2	Live Birth-LB	1	Already on ART	1	2019-01-21	1c = TDF/3TC/DTG	3		2021-11-18	Pregnant	2022-05-18	181	6+ months	3	180	180	0	Yes	1	Suppressed	1	2022-05-19	1	182
16	IMPORTA-0053	1	2022-08-29	Tabu Alfred Mark	Yei Hospital	2	2021-08-30	21	Hai Tarawa	Married Monogamous	2	Housewife	1	2	3		8	1	Known Pos on ART	2	2 visits	2	2	At home	2	Live Birth-LB	1	Already on ART	1	2021-03-10	1c = TDF/3TC/DTG	3		2021-08-30	Pregnant	2022-03-01	183	6+ months	3	180	180	0	No	2	NA	3	2022-03-04	3	186
17	IMPORTA-0054	1	2022-08-31	Tabu Alfred Mark	Yei Hospital	2	2021-11-28	30	Hai Simba	Married Monogamous	2	Business (Man/Women)/trader	2	3	3	44184	30	2	Known Pos on ART	2	1 visit	1	1	At Health Facility	1	Live Birth-LB	1	Already on ART	1	2016-10-26	1e = AZT/3TC+DTG	5		2019-11-28	Pregnant	2019-12-28	30	<3 months	1	30	30	0	No	2	NA	3	2019-12-05	-23	7
18	IMPORTA-0055	1	2022-08-30	Tabu Alfred Mark	Yei Hospital	2	2021-11-11	31	Hai Nyakama	Married Monogamous	2	Housewife	1	1	2	44652	12	1	Known Pos on ART	2	2 visits	2	2	At Health Facility	1	Live Birth-LB	1	Already on ART	1	2021-03-12	1f = TDF/3TC/EFV	6		2021-11-11	Pregnant	2022-05-11	181	6+ months	3	180	180	0	Yes	1	Suppressed	1	2022-05-11	0	181
19	IMPORTA-0056	1	2022-08-30	Tabu Alfred Mark	Yei Hospital	2	2021-09-24	24	Hai Tarawa	Married Monogamous	2	Housewife	1	1	2	44621			Known Pos on ART	2	2 visits	2	2	At Health Facility	1	Live Birth-LB	1	Already on ART	1	2020-12-10	1f = TDF/3TC/EFV	6		2021-09-24	Pregnant	2022-03-24	181	6+ months	3	180	180	0	Yes	1	Suppressed	1	2022-03-22	-2	179
20	IMPORTA-0057	1	2022-08-30	Tabu Alfred Mark	Yei Hospital	2	2021-08-09	23	Hai peace	Married Monogamous	2	Housewife	1	1	2	44531	11	1	Known Pos on ART	2	3 visits	3	3	At Health Facility	1	Live Birth-LB	1	Already on ART	1	2021-04-04	1f = TDF/3TC/EFV	6		2021-08-09	Pregnant	2022-02-09	184	6+ months	3	180	180	0	Yes	1	Suppressed	1	2022-02-08	-1	183
21	IMPORTA-0058	1	2022-08-30	Tabu Alfred Mark	Yei Hospital	2	2021-08-04	23	Hai peace	Married Monogamous	2	Unemployed	1	1	2	44568			Newly tested at ANC	1	2 visits	2	2	At Health Facility	1	Live Birth-LB	1	New on ART -- in pregnancy	2	2021-01-05	1c = TDF/3TC/DTG	3		2021-08-04	Pregnant	2022-02-04	184	6+ months	3	180	180	0	Yes	1	Suppressed	1	2022-02-08	4	188
22	IMPORTA-0059	1	2022-08-30	Tabu Alfred Mark	Yei Hospital	2	2020-10-27	23	Gabat	Married Monogamous	2	Housewife	1	1	2		12	1	Known Pos not on ART	2	1 visit	1	1	At Health Facility	1	Live Birth-LB	1	Already on ART	1	2019-01-10	1f = TDF/3TC/EFV	6		2020-10-27	Pregnant	2021-04-25	180	6+ months	3	180	180	0	No	2	NA	3	2021-04-23	-2	178
23	IMPORTA-0060	1	2022-08-30	Tabu Alfred Mark	Yei Hospital	2	2021-01-15	25	Ilimoko	Married Monogamous	2	Housewife	1	2	3	44198	36	2	Known Pos on ART	2	1 visit	1	1	At Health Facility	1	Live Birth-LB	1	Already on ART	1	2020-10-04	1f = TDF/3TC/EFV	6		2021-01-15	Pregnant	2021-07-15	181	6+ months	3	180	180	0	Yes	1	Suppressed	1	2021-07-13	-2	179
24	IMPORTA-0061	1	2022-08-30	Tabu Alfred Mark	Yei Hospital	2	2021-04-01	21	Lomuku	Married Monogamous	2	Housewife	1	1	2		16	2	Known Pos on ART	2	3 visits	3	3	At Health Facility	1	Live Birth-LB	1	Already on ART	1	2020-01-10	1f = TDF/3TC/EFV	6		2021-04-01	Pregnant	2021-10-01	183	6+ months	3	180	180	0	Yes	1	Suppressed	1	2021-10-05	4	187
25	IMPORTA-0062	1	2022-08-30	Tabu Alfred Mark	Yei Hospital	2	2021-01-26	33	Gabat	Married Polygamous	2	Housewife	1	1	2		8	1	Known Pos on ART	2	3 visits	3	3	At home	2	Live Birth-LB	1	Already on ART	1	2019-11-14	1f = TDF/3TC/EFV	6		2021-01-26	Pregnant	2021-07-23	178	3-5 months	2	180	180	0	Yes	1	Suppressed	1	2021-10-05	74	252
26	IMPORTA-0063	1	2022-08-30	Tabu Alfred Mark	Yei Hospital	2	2021-11-03	28	Hai leben	Married Monogamous	2	Housewife	1	1	2	44562	15	1	Known Pos on ART	2	2 visits	2	2	At home	2	Live Birth-LB	1	Already on ART	1	2020-06-10	1f = TDF/3TC/EFV	6		2021-11-03	Pregnant	2022-05-04	182	6+ months	3	180	180	0	Yes	1	Suppressed	1	2022-05-09	5	187
27	IMPORTA-0064	1	2022-08-30	Tabu Alfred Mark	Yei Hospital	2	2021-08-10	23	Lomuku 2	Married Monogamous	2	Housewife	1	2	3	44593	28	2	Known Pos on ART	2	2 visits	2	2	At Health Facility	1	Live Birth-LB	1	Already on ART	1		1f = TDF/3TC/EFV	6		2021-08-10	Pregnant	2022-02-10	184	6+ months	3	180	180	0	Yes	1	Suppressed	1	2022-02-14	4	188
28	IMPORTA-0065	1	2022-08-30	Tabu Alfred Mark	Yei Hospital	2	2021-07-25	26	Hai mahad	Married Monogamous	2	Housewife	1	1	2	44562	8	1	Known Pos on ART	2	1 visit	1	1	At Health Facility	1	Live Birth-LB	1	Already on ART	1	2018-06-10	1f = TDF/3TC/EFV	6		2021-01-25	Pregnant	2021-07-25	181	6+ months	3	180	180	0	No	2	NA	3	2021-07-22	-3	178
29	IMPORTA-0066	1	2022-08-30	Tabu Alfred Mark	Yei Hospital	2	2021-06-29	19	Hai Leben	Married Monogamous	2	Housewife	1	1	2				Known Pos on ART	2	3 visits	3	3	At Health Facility	1	Live Birth-LB	1	Already on ART	1	2013-02-10	1f = TDF/3TC/EFV	6		2021-06-29	Pregnant	2021-12-29	183	6+ months	3	180	180	0	Yes	1	Suppressed	1	2021-12-21	-8	175
30	IMPORTA-0067	1	2022-08-30	Tabu Alfred Mark	Yei Hospital	2	2021-05-07	18	Hai Leben	Married Monogamous	2	Housewife	1	2	3	44501			Known Pos on ART	2	3 visits	3	3	At Health Facility	1	Live Birth-LB	1	Already on ART	1	2019-06-25	1f = TDF/3TC/EFV	6		2021-05-07	Pregnant	2021-11-07	184	6+ months	3	180	180	0	No	2	NA	3	2021-10-28	-10	174
31	IMPORTA-0068	1	2022-08-30	Tabu Alfred Mark	Yei Hospital	2	2021-06-15	22	Hai peace	Married Polygamous	2	Housewife	1	1	2	44531	32	2	Known Pos on ART	2	3 visits	3	3	At home	2	Live Birth-LB	1	Already on ART	1	2013-03-09	1f = TDF/3TC/EFV	6		2021-06-15	Pregnant	2021-12-15	183	6+ months	3	180	180	0	No	2	NA	3	2021-10-08	-68	115
32	IMPORTA-0069	1	2022-08-29	Tabu Alfred Mark	Yei Hospital	2	2020-10-21	30	Hai Tarawa	Married Monogamous	2	Housewife	1	3	3	43987	18	2	Known Pos on ART	2	1 visit	1	1	At home	2	Live Birth-LB	1	Already on ART	1	2009-08-11	1b = AZT/3TC/NVP	2		2020-10-21	Pregnant	2021-04-17	178	3-5 months	2	180	180	0	No	2	NA	3	2021-04-08	-9	169
33	IMPORTA-0070	1	2022-08-29	Tabu Alfred Mark	Yei Hospital	2	2020-12-01	30	Hai Tarawa	Married Polygamous	2	Housewife	1	2	3	44348	12	1	Known Pos on ART	2	3 visits	3	3	At Health Facility	1	Live Birth-LB	1	Already on ART	1	2018-10-02	1f = TDF/3TC/EFV	6		2020-12-01	Pregnant	2021-06-01	182	6+ months	3	180	180	0	Yes	1	Suppressed	1	2021-06-01	0	182
34	IMPORTA-0071	1	2022-08-31	Tabu Alfred Mark	Yei Hospital	2	2020-03-24	35	Kanjoro	Married Monogamous	2	Housewife	1	3	3	43891	32	2	Known Pos on ART	2	1 visit	1	1	At Health Facility	1	Live Birth-LB	1	Already on ART	1	2016-02-22	1c = TDF/3TC/DTG	3		2020-03-17	Pregnant	2020-09-16	183	6+ months	3	180	180	0	Yes	1	Suppressed	1	2020-09-30	14	197
35	IMPORTA-0072	1	2022-08-29	Tabu Alfred Mark	Yei Hospital	2	2021-09-22	30	Hai Tarawa	Married Monogamous	2	Housewife	1	1	2	44688	28	2	Newly tested at ANC	1	3 visits	3	3	At Health Facility	1	Live Birth-LB	1	New on ART -- in pregnancy	2	2021-09-22	1c = TDF/3TC/DTG	3		2021-09-22	Pregnant	2022-01-22	122	3-5 months	2	90	90	0	No	2	NA	3	2022-01-21	-1	121
72	IMPORTA-0073	1	2022-08-31	Tabu Alfred Mark	Yei Hospital	2	2020-03-19	30	Jigomoni	Married Monogamous	2	Housewife	1	3	3	44020			Known Pos on ART	2	2 visits	2	2	At Health Facility	1	Live Birth-LB	1	Already on ART	1	2014-08-27	1f = TDF/3TC/EFV	6		2020-04-08	Pregnant	2020-10-08	183	6+ months	3	180	180	0	Yes	1	Suppressed	1	2020-09-20	-18	165
73	IMPORTA-0074	1	2022-08-31	Tabu Alfred Mark	Yei Hospital	2	2020-03-18	32	TTC	Married Polygamous	2	Housewife	1	3	3	44016	22	2	Known Pos on ART	2	1 visit	1	1	At Health Facility	1	Live Birth-LB	1	Already on ART	1	2014-08-20	1f = TDF/3TC/EFV	6		2020-02-04	Pregnant	2020-05-05	91	3-5 months	2	90	90	0	No	2	NA	3	2020-05-06	1	92
74	IMPORTA-0075	1	2022-08-31	Tabu Alfred Mark	Yei Hospital	2	2020-06-03	35	Hai peace	Married Monogamous	2	Housewife	1	2	3	44085			Known Pos on ART	2	1 visit	1	1	At Health Facility	1	Live Birth-LB	1	Already on ART	1	2014-10-01	1f = TDF/3TC/EFV	6		2020-04-06	Pregnant	2020-10-05	182	6+ months	3	180	180	0	Yes	1	Suppressed	1	2020-10-08	3	185
75	IMPORTA-0076	1	2022-08-31	Tabu Alfred Mark	Yei Hospital	2	2020-03-23	26	Hai Simba	Married Polygamous	2	Housewife	1	3	3	44089	12	1	Known Pos on ART	2	1 visit	1	1	At Health Facility	1	Live Birth-LB	1	Already on ART	1	2019-07-01	1f = TDF/3TC/EFV	6		2020-04-29	Pregnant	2020-10-27	181	6+ months	3	180	180	0	Yes	1	Suppressed	1	2020-11-24	28	209
76	IMPORTA-0077	1	2022-08-31	Tabu Alfred Mark	Yei Hospital	2	2020-09-18	30	Lomuku	Married Monogamous	2	Housewife	1	3	3	44147			Known Pos on ART	2	2 visits	2	2	At Health Facility	1	Live Birth-LB	1	Already on ART	1	2020-07-16	1c = TDF/3TC/DTG	3		2020-07-16	Pregnant	2021-01-14	182	6+ months	3	180	180	0	NA	3	NA	3	2021-01-19	5	187
77	IMPORTA-0078	1	2022-08-31	Tabu Alfred Mark	Yei Hospital	2	2020-05-07	30	Lomuku 2	Married Monogamous	2	Housewife	1	3	3	44096			Known Pos on ART	2	2 visits	2	2	At home	2	Live Birth-LB	1	Already on ART	1	2020-04-20	1c = TDF/3TC/DTG	3		2020-04-20	Pregnant	2020-10-19	182	6+ months	3	180	180	0	NA	3	NA	3	2021-02-08	112	294
78	IMPORTA-0079	1	2022-08-31	Tabu Alfred Mark	Yei Hospital	2	2019-11-29	26	Kanjoro	Married Monogamous	2	Housewife	1	2	3	43853	32	2	Known Pos on ART	2	1 visit	1	1	At Health Facility	1	Live Birth-LB	1	Already on ART	1	2015-08-03	1f = TDF/3TC/EFV	6		2019-11-27	Pregnant	2020-02-26	91	3-5 months	2	90	90	0	Yes	1	Suppressed	1	2020-02-25	-1	90
1	IMPORTA-0080	1	2022-08-29	Asega Philip Poru	Juba Teaching Hospital	1	2019-10-09	27	UNMISS	Married Monogamous	2	Housewife	1	1	3	43758			Known Pos on ART	2	2 visits	2	2	At Health Facility	1	Live Birth-LB	1	Already on ART	1	2019-10-09	1c = TDF/3TC/DTG	3		2019-10-09	Pregnant	2019-11-08	30	<3 months	1	30	30	0	No	2	NA	3	2019-12-12	34	64
2	IMPORTA-0081	1	2022-08-29	Asega Philip Poru	Juba Teaching Hospital	1	2019-11-18	28	Malakia	Married Polygamous	2	Business (Man/Women)/trader	2		3	43987			Known Pos on ART	2	4 or more visits	4	3	At Health Facility	1	Live Birth-LB	1	Already on ART	1	2017-08-28	1c = TDF/3TC/DTG	3		2019-11-18	Pregnant	2020-02-18	92	3-5 months	2	90	90	0	Yes	1	Suppressed	1	2020-01-30	-19	73
3	IMPORTA-0082	1	2022-08-29	Asega Philip Poru	Juba Teaching Hospital	1	2019-10-28	30				Housewife	1	1		43812	33	2	Known Pos on ART	2	1 visit	1	1			Live Birth-LB	1	Already on ART	1	2017-05-15	1c = TDF/3TC/DTG	3		2019-10-28	Pregnant	2020-04-27	182	6+ months	3	180	180	0	Yes	1	Suppressed	1	2020-07-06	70	252
4	IMPORTA-0083	1	2022-08-29	Asega Philip Poru	Juba Teaching Hospital	1	2019-10-24	24				Student	1	1	3	43953	12	1	Known Pos on ART	2	1 visit	1	1	At Health Facility	1	Live Birth-LB	1	Already on ART	1		1c = TDF/3TC/DTG	3		2019-10-24	Pregnant	2020-01-23	91	3-5 months	2	90	90	0	No	2	NA	3	2020-01-14	-9	82
5	IMPORTA-0084	1	2022-08-29	Asega Philip Poru	Juba Teaching Hospital	1	2019-11-14	39	Gudele 2	Married Monogamous	2					43955	16	2	Known Pos on ART	2								Already on ART	1	2019-04-28	1c = TDF/3TC/DTG	3		2019-11-14	Pregnant	2020-03-13	120	3-5 months	2	120	120	0	Yes	1	Suppressed	1	2020-03-02	-11	109
6	IMPORTA-0085	1	2022-08-29	Asega Philip Poru	Juba Teaching Hospital	1	2019-11-26	33	Lologo	Married Polygamous	2	Housewife	1	1		43896			Known Pos on ART	2	2 visits	2	2	At home	2	Still Birth-MSB or FSB	2	Already on ART	1	2016-10-11	1c = TDF/3TC/DTG	3		2019-11-26	Pregnant	2020-02-25	91	3-5 months	2	90	90	0	Yes	1	Suppressed	1	2020-02-04	-21	70
7	IMPORTA-0086	1	2022-08-29	Asega Philip Poru	Juba Teaching Hospital	1	2019-10-30	40	Munuki			Salaried Employee	2	2	3	43832	32	2	Known Pos on ART	2	2 visits	2	2	At Health Facility	1			Already on ART	1	2018-05-28	1c = TDF/3TC/DTG	3		2019-10-30	Pregnant	2020-01-29	91	3-5 months	2	90	90	0	Yes	1	Suppressed	1	2020-04-21	83	174
8	IMPORTA-0087	1	2022-08-29	Asega Philip Poru	Juba Teaching Hospital	1	2020-01-21	28	Lologo	Married Monogamous	2	Business (Man/Women)/trader	2	2		43941	32	2	Newly tested at ANC	1	3 visits	3	3	At Health Facility	1	Live Birth-LB	1	New on ART -- in pregnancy	2	2020-01-21	1c = TDF/3TC/DTG	3		2020-01-21	Pregnant	2020-04-21	91	3-5 months	2	90	90	0	NA	3	NA	3	2020-04-21	0	91
9	IMPORTA-0088	1	2022-08-29	Asega Philip Poru	Juba Teaching Hospital	1	2019-11-18	22	Tongping	Married Monogamous	2				2	43833	22	2	Known Pos on ART	2				At Health Facility	1	Live Birth-LB	1	Already on ART	1	2016-04-29	1c = TDF/3TC/DTG	3		2019-11-18	Pregnant	2020-02-18	92	3-5 months	2	90	90	0	Yes	1	Suppressed	1	2020-04-14	56	148
10	IMPORTA-0089	1	2022-08-29	Asega Philip Poru	Juba Teaching Hospital	1	2019-11-28	30	munuki	Divorced/separated	3	Business (Man/Women)/trader	2	1	4	43956			Known Pos on ART	2	2 visits	2	2	At Health Facility	1	Live Birth-LB	1	Already on ART	1	2017-09-25	1c = TDF/3TC/DTG	3		2019-11-28	Pregnant	2020-02-27	91	3-5 months	2	90	90	0	Yes	1	Suppressed	1	2020-02-24	-3	88
11	IMPORTA-0090	1	2022-08-29	Asega Philip Poru	Juba Teaching Hospital	1	2019-11-13	28	Shirikat	Married Monogamous	2	Business (Man/Women)/trader	2			43950			Newly tested at ANC	1	2 visits	2	2	At Health Facility	1	Live Birth-LB	1	New on ART -- in pregnancy	2	2019-11-13	1c = TDF/3TC/DTG	3		2019-11-13	Pregnant	2019-12-13	30	<3 months	1	30	30	0	NA	3	NA	3	2019-12-13	0	30
12	IMPORTA-0091	1	2022-08-29	Asega Philip Poru	Juba Teaching Hospital	1	2019-10-10	30	gudele	Married Monogamous	2	Unemployed	1	1	2	43867	16	2	Known Pos on ART	2	2 visits	2	2	At Health Facility	1	Live Birth-LB	1	Already on ART	1	2018-05-18	1c = TDF/3TC/DTG	3		2019-10-10	Pregnant	2019-11-12	33	<3 months	1	30	30	0	Yes	1	Suppressed	1	2019-11-12	0	33
13	IMPORTA-0092	1	2022-08-29	Asega Philip Poru	Juba Teaching Hospital	1	2019-11-12	27	Jebel suk	Married Polygamous	2	Salaried Employee	2	1	3	43912			Known Pos on ART	2	3 visits	3	3	At Health Facility	1	Live Birth-LB	1	Already on ART	1	2019-06-07	1c = TDF/3TC/DTG	3		2019-11-12	Pregnant	2020-02-11	91	3-5 months	2	90	90	0	Yes	1	Suppressed	1	2020-09-30	232	323
14	IMPORTA-0093	1	2022-08-29	Asega Philip Poru	Juba Teaching Hospital	1	2020-02-07	32	Boguru	Married Polygamous	2	Housewife	1	3	3	44016	12	1	Known Pos on ART	2	1 visit	1	1	At Health Facility	1			Already on ART	1	2016-05-03	1c = TDF/3TC/DTG	3		2020-02-07	Pregnant	2020-05-06	89	<3 months	1	90	90	0	Yes	1	Suppressed	1	2020-05-15	9	98
15	IMPORTA-0094	1	2022-08-29	Asega Philip Poru	Juba Teaching Hospital	1	2020-02-12	26	Jebel	Married Polygamous	2	Housewife	1	3		44091	20	2	Known Pos on ART	2	3 visits	3	3	At Health Facility	1	Live Birth-LB	1	Already on ART	1	2016-11-30	1c = TDF/3TC/DTG	3		2020-02-12	Pregnant	2020-06-11	120	3-5 months	2	120	120	0	No	2	NA	3	2020-06-18	7	127
16	IMPORTA-0095	1	2022-08-29	Asega Philip Poru	Juba Teaching Hospital	1	2019-12-30	30	Nyakuron			Housewife	1	3	4	43931			Known Pos on ART	2	1 visit	1	1	At Health Facility	1	Live Birth-LB	1	Already on ART	1	2013-12-06	1c = TDF/3TC/DTG	3		2019-12-30	Pregnant	2020-03-30	91	3-5 months	2	90	90	0	Yes	1	Suppressed	1	2020-03-18	-12	79
17	IMPORTA-0096	1	2022-08-29	Asega Philip Poru	Juba Teaching Hospital	1	2019-12-19	28	Gudele			Housewife	1		3	44012	28	2	Known Pos on ART	2	1 visit	1	1	At Health Facility	1	Live Birth-LB	1	Already on ART	1	2015-06-16	1c = TDF/3TC/DTG	3		2019-12-19	Pregnant	2020-04-18	121	3-5 months	2	120	120	0	Yes	1	Suppressed	1	2020-04-20	2	123
18	IMPORTA-0097	1	2022-08-29	Asega Philip Poru	Juba Teaching Hospital	1	2020-01-27	27	Atlabara	Married Polygamous	2	Business (Man/Women)/trader	2	1	2	44093	8	1	Newly tested at ANC	1	1 visit	1	1	At Health Facility	1	Live Birth-LB	1	New on ART -- in pregnancy	2	2020-01-27	1c = TDF/3TC/DTG	3		2020-01-27	Pregnant	2020-04-26	90	3-5 months	2	90	90	0	NA	3	NA	3	2020-03-27	-30	60
19	IMPORTA-0098	1	2022-08-29	Asega Philip Poru	Juba Teaching Hospital	1	2019-12-18	25	Gumbo	Married Monogamous	2	Housewife	1		4	44019	14	1	Known Pos on ART	2				At Health Facility	1	Live Birth-LB	1	Already on ART	1	2019-03-13	1c = TDF/3TC/DTG	3		2019-12-18	Pregnant	2020-03-18	91	3-5 months	2	90	90	0	Yes	1	Suppressed	1	2020-03-10	-8	83
20	IMPORTA-0099	1	2022-08-29	Asega Philip Poru	Juba Teaching Hospital	1	2019-12-10	24	Juba nabari	Married Monogamous	2	Housewife	1		2	43919	28	2	Known Pos on ART	2	1 visit	1	1	At Health Facility	1	Live Birth-LB	1	Already on ART	1	2013-03-18	1c = TDF/3TC/DTG	3		2019-12-10	Pregnant	2020-03-09	90	3-5 months	2	90	90	0	Yes	1	Suppressed	1	2020-03-24	15	105
21	IMPORTA-0100	1	2022-08-31	Asega Philip Poru	Juba Teaching Hospital	1	2020-01-03	26	Gudele	Married Monogamous	2	Housewife	1	2	3	43915	28	2	Known Pos on ART	2				At Health Facility	1	Live Birth-LB	1	Already on ART	1	2019-01-19	1c = TDF/3TC/DTG	3		2020-01-13	Pregnant	2020-04-02	80	<3 months	1	90	90	0	Yes	1	Suppressed	1	2020-03-03	-30	50
22	IMPORTA-0101	1	2022-08-31	Asega Philip Poru	Juba Teaching Hospital	1	2020-02-11	28	Giada	Married Polygamous	2			3		44013	24	2	Known Pos on ART	2	2 visits	2	2	At Health Facility	1	Live Birth-LB	1	Already on ART	1	2016-04-14	1c = TDF/3TC/DTG	3		2020-02-11	Pregnant	2020-05-08	87	<3 months	1	90	90	0	Yes	1	Suppressed	1	2020-09-14	129	216
23	IMPORTA-0102	1	2022-08-31	Asega Philip Poru	Juba Teaching Hospital	1	2020-02-13	23	Gumbo	Married Monogamous	2	Housewife	1	1	2	44089	8	1	Known Pos on ART	2	4 or more visits	4	3	At Health Facility	1			Already on ART	1	2017-03-30	1c = TDF/3TC/DTG	3		2020-02-13	Pregnant	2020-05-13	90	3-5 months	2	90	90	0	No	2	NA	3	2020-05-13	0	90
24	IMPORTA-0103	1	2022-08-31	Asega Philip Poru	Juba Teaching Hospital	1	2020-01-20	30	Gudele			Housewife	1	3		43956	8	1	Known Pos on ART	2	1 visit	1	1	At home	2	Live Birth-LB	1	Already on ART	1	2013-04-09	1c = TDF/3TC/DTG	3		2020-01-20	Pregnant	2020-04-17	88	<3 months	1	90	90	0	Yes	1	Suppressed	1	2020-04-17	0	88
25	IMPORTA-0104	1	2022-08-31	Asega Philip Poru	Juba Teaching Hospital	1	2020-02-13	38	Nyokuron	Married Monogamous	2	Housewife	1	2	3	44077	8	1	Known Pos on ART	2	2 visits	2	2	At home	2	Live Birth-LB	1	Already on ART	1	2014-03-21	1c = TDF/3TC/DTG	3		2020-02-13	Pregnant	2020-05-12	89	<3 months	1	90	90	0	Yes	1	Suppressed	1	2020-04-07	-35	54
26	IMPORTA-0105	1	2022-08-31	Asega Philip Poru	Juba Teaching Hospital	1	2020-02-14	25	Suk Zande	Married Monogamous	2	Business (Man/Women)/trader	2	1	2	43924	24	2	Known Pos on ART	2	3 visits	3	3			Live Birth-LB	1	Already on ART	1	2017-05-22	1c = TDF/3TC/DTG	3		2020-02-14	Pregnant	2020-06-12	119	3-5 months	2	120	120	0	Yes	1	Suppressed	1	2020-06-24	12	131
27	IMPORTA-0106	1	2022-08-31	Asega Philip Poru	Juba Teaching Hospital	1	2020-02-07	31	Jebel suk	Married Polygamous	2	Housewife	1	3	3	44051	14	1	Known Pos on ART	2				At Health Facility	1	Live Birth-LB	1	Already on ART	1	2018-09-14	1c = TDF/3TC/DTG	3		2020-02-07	Pregnant	2020-05-05	88	<3 months	1	90	90	0	Yes	1	Suppressed	1	2020-06-09	35	123
28	IMPORTA-0107	1	2022-08-31	Asega Philip Poru	Juba Teaching Hospital	1	2020-02-17	31	Hai referendum	Married Polygamous	2	Housewife	1	3	3	44048			Known Pos on ART	2						Live Birth-LB	1	Already on ART	1	2018-03-19	1c = TDF/3TC/DTG	3		2020-02-17	Pregnant	2020-05-18	91	3-5 months	2	90	90	0	Yes	1	Suppressed	1	2020-05-18	0	91
29	IMPORTA-0108	1	2022-08-31	Asega Philip Poru	Juba Teaching Hospital	1	2020-02-06	23	Newsite	Married Monogamous	2	Student	1	2		44031	12	1	Known Pos on ART	2	1 visit	1	1	At Health Facility	1	Live Birth-LB	1	Already on ART	1	2019-08-05	1c = TDF/3TC/DTG	3		2020-02-06	Pregnant	2020-05-06	90	3-5 months	2	90	90	0	Yes	1	Suppressed	1	2020-04-15	-21	69
30	IMPORTA-0109	1	2022-09-01	Asega Philip Poru	Juba Teaching Hospital	1	2020-04-24	30	Nyakuron	Married Polygamous	2	Business (Man/Women)/trader	2		3	44103	16	2	Newly tested at ANC	1				At home	2	Live Birth-LB	1	New on ART -- in pregnancy	2	2020-04-24	1c = TDF/3TC/DTG	3		2020-04-24	Pregnant	2020-10-23	182	6+ months	3	180	180	0	Yes	1	Suppressed	1	2020-10-19	-4	178
31	IMPORTA-0110	1	2022-09-01	Asega Philip Poru	Juba Teaching Hospital	1	2020-04-20	25	Gudele			Housewife	1	1	2	43971	10	1	Known Pos on ART	2	1 visit	1	1	At Health Facility	1	Live Birth-LB	1	Already on ART	1	2017-06-29	1c = TDF/3TC/DTG	3		2020-04-20	Pregnant	2020-10-19	182	6+ months	3	180	180	0	Yes	1	Suppressed	1	2020-10-13	-6	176
32	IMPORTA-0111	1	2022-09-01	Asega Philip Poru	Juba Teaching Hospital	1	2020-04-10	25	Tomping			Housewife	1			44056	25	2	Newly tested at ANC	1	3 visits	3	3			Live Birth-LB	1	New on ART -- in pregnancy	2	2020-04-10	1c = TDF/3TC/DTG	3		2020-04-10	Pregnant	2020-10-12	185	6+ months	3	180	180	0	NA	3	NA	3	2020-08-14	-59	126
32	IMPORTA-0112	1	2022-09-01	Asega Philip Poru	Juba Teaching Hospital	1	2020-04-08	27	Gudele	Married Monogamous	2	Salaried Employee	2	2	2	44028	18	2	Newly tested at ANC	1	2 visits	2	2	At Health Facility	1	Live Birth-LB	1	New on ART -- in pregnancy	2	2020-04-08	1c = TDF/3TC/DTG	3		2020-04-08	Pregnant	2020-10-08	183	6+ months	3	180	180	0	NA	3	NA	3	2020-09-28	-10	173
34	IMPORTA-0113	1	2022-09-01	Asega Philip Poru	Juba Teaching Hospital	1	2020-04-01	29	Gudele 1	Married Monogamous	2	Business (Man/Women)/trader	2	3	3	43986	24	2	Known Pos on ART	2	2 visits	2	2	At Health Facility	1	Live Birth-LB	1	Already on ART	1	2020-03-06	1c = TDF/3TC/DTG	3		2020-04-01	Pregnant	2020-09-30	182	6+ months	3	180	180	0	Yes	1	Suppressed	1	2020-08-03	-58	124
35	IMPORTA-0114	1	2022-09-01	Asega Philip Poru	Juba Teaching Hospital	1	2020-05-27	29	Hai Amarat	Married Monogamous	2	Housewife	1	3	3	44172	12	1	Newly tested at ANC	1				At Health Facility	1	Live Birth-LB	1	New on ART -- in pregnancy	2	2020-05-27	1c = TDF/3TC/DTG	3		2020-05-27	Pregnant	2020-11-23	180	6+ months	3	180	180	0	NA	3	NA	3	2020-09-21	-63	117
36	IMPORTA-0115	1	2022-09-01	Asega Philip Poru	Juba Teaching Hospital	1	2020-04-20	21	Gudele	Married Monogamous	2	Housewife	1	1	2	44114	8	1	Known Pos on ART	2	4 or more visits	4	3	At Health Facility	1	Live Birth-LB	1	Already on ART	1	2011-01-29	1c = TDF/3TC/DTG	3		2020-04-20	Pregnant	2020-10-19	182	6+ months	3	180	180	0	Yes	1	Suppressed	1	2020-10-19	0	182
37	IMPORTA-0116	1	2022-09-01	Asega Philip Poru	Juba Teaching Hospital	1	2020-06-09	30	Gumbo	Married Monogamous	2	Housewife	1	2		44167			Known Pos on ART	2	3 visits	3	3	At Health Facility	1	Live Birth-LB	1	Already on ART	1	2018-06-25	1c = TDF/3TC/DTG	3		2020-06-09	Pregnant	2020-12-07	181	6+ months	3	180	180	0	Yes	1	Suppressed	1	2021-01-01	25	206
38	IMPORTA-0117	1	2022-09-01	Asega Philip Poru	Juba Teaching Hospital	1	2020-04-17	25	Suk Jebel	Married Monogamous	2	Housewife	1	1	2	44025	28	2	Newly tested at ANC	1	3 visits	3	3	At Health Facility	1			New on ART -- in pregnancy	2	2020-04-17	1c = TDF/3TC/DTG	3		2020-04-17	Pregnant	2020-10-16	182	6+ months	3	180	180	0	NA	3	NA	3	2020-10-21	5	187
3	IMPORTA-0118	1	2022-09-01	Asega Philip Poru	Juba Teaching Hospital	1	2020-02-24	28	Shirikat	Married Monogamous	2	Business (Man/Women)/trader	2	2	3	44064			Known Pos on ART	2	2 visits	2	2	At home	2	Live Birth-LB	1	Already on ART	1	2018-06-04	1c = TDF/3TC/DTG	3		2020-02-24	Pregnant	2020-05-22	88	<3 months	1	90	90	0	Yes	1	Suppressed	1	2020-05-29	7	95
40	IMPORTA-0119	1	2022-09-01	Asega Philip Poru	Juba Teaching Hospital	1	2020-02-20	28	Shirikat	Married Monogamous	2	Housewife	1	3		44016	18	2	Newly tested at ANC	1	3 visits	3	3			Live Birth-LB	1	New on ART -- in pregnancy	2	2020-02-20	1c = TDF/3TC/DTG	3		2020-02-20	Pregnant	2020-05-20	90	3-5 months	2	90	90	0	NA	3	NA	3	2020-06-02	13	103
41	IMPORTA-0120	1	2022-09-01	Asega Philip Poru	Juba Teaching Hospital	1	2020-01-21	33	Bilinyang	Married Polygamous	2	Business (Man/Women)/trader	2	3	3	43992	20	2	Newly tested at ANC	1	1 visit	1	1	At Health Facility	1	Live Birth-LB	1	New on ART -- in pregnancy	2	2020-01-21	1c = TDF/3TC/DTG	3		2020-01-21	Pregnant	2020-04-21	91	3-5 months	2	90	90	0	NA	3	NA	3	2020-06-06	46	137
42	IMPORTA-0121	1	2022-09-01	Asega Philip Poru	Juba Teaching Hospital	1	2020-02-27	32	Nyakuron	Married Monogamous	2	Housewife	1	2	3	44095	12	1	Known Pos on ART	2	1 visit	1	1	At Health Facility	1	Live Birth-LB	1	Already on ART	1	2013-02-11	1c = TDF/3TC/DTG	3		2020-02-27	Pregnant	2020-05-26	89	<3 months	1	90	90	0	Yes	1	Suppressed	1	2020-05-18	-8	81
43	IMPORTA-0122	1	2022-09-02	Asega Philip Poru	Juba Teaching Hospital	1	2020-07-21	27	Munuki	Single (never married)	1	Farming	2		3	44142	26	2	Known Pos on ART	2	3 visits	3	3	At Health Facility	1	Live Birth-LB	1	Already on ART	1	2019-03-11	1c = TDF/3TC/DTG	3		2020-07-21	Pregnant	2021-01-20	183	6+ months	3	180	180	0	Yes	1	Suppressed	1	2021-01-12	-8	175
44	IMPORTA-0123	1	2022-09-02	Asega Philip Poru	Juba Teaching Hospital	1	2020-08-27	28	Tongping			Housewife	1	3	2	44113	22	2	Known Pos on ART	2	1 visit	1	1	At Health Facility	1	Live Birth-LB	1	Already on ART	1	2014-11-03	1c = TDF/3TC/DTG	3		2020-08-27	Pregnant	2020-11-27	92	3-5 months	2	90	90	0	Yes	1	Suppressed	1	2021-04-28	152	244
45	IMPORTA-0124	1	2022-09-02	Asega Philip Poru	Juba Teaching Hospital	1	2020-08-25	29	Munuki	Divorced/separated	3	Housewife	1	1		44138	38	2	Known Pos on ART	2	1 visit	1	1	At Health Facility	1	Live Birth-LB	1	Already on ART	1	2014-11-10	1c = TDF/3TC/DTG	3		2020-08-25	Pregnant	2021-02-24	183	6+ months	3	180	180	0	Yes	1	Unsuppressed	2	2021-02-08	-16	167
46	IMPORTA-0125	1	2022-09-02	Asega Philip Poru	Juba Teaching Hospital	1	2020-08-26	30	Hai Tarawa	Married Polygamous	2	Business (Man/Women)/trader	2	1	3	44137	32	2	Known Pos on ART	2	2 visits	2	2	At Health Facility	1	Live Birth-LB	1	Already on ART	1	2019-05-02	1c = TDF/3TC/DTG	3		2020-08-26	Pregnant	2021-02-25	183	6+ months	3	180	180	0	Yes	1	Suppressed	1	2021-06-04	99	282
47	IMPORTA-0126	1	2022-08-29	Asega Philip Poru	Juba Teaching Hospital	1	2019-10-01	28	Lemon Gabat	Married Polygamous	2	Farming	2	3		43863	20	2	Known Pos on ART	2				At Health Facility	1	Live Birth-LB	1	Already on ART	1	2016-10-18	1e = AZT/3TC+DTG	5		2019-10-01	Pregnant	2020-04-02	184	6+ months	3	180	180	0	No	2	NA	3	2020-07-27	116	300
48	IMPORTA-0127	1	2022-08-29	Asega Philip Poru	Juba Teaching Hospital	1	2019-10-25	32	Atlabara			Housewife	1	3	3	43968	12	1	Known Pos on ART	2				At Health Facility	1	Live Birth-LB	1	Already on ART	1	2010-06-17	1c = TDF/3TC/DTG	3		2019-10-25	Pregnant	2020-01-24	91	3-5 months	2	90	90	0	Yes	1	Suppressed	1	2020-01-24	0	91
49	IMPORTA-0128	1	2022-08-29	Asega Philip Poru	Juba Teaching Hospital	1	2019-10-23	19	Shirikat	Married Monogamous	2	Housewife	1	1	1	43864	25	2	Known Pos on ART	2	3 visits	3	3	At Health Facility	1	Live Birth-LB	1	Already on ART	1	2015-10-20	1c = TDF/3TC/DTG	3		2019-10-23	Pregnant	2019-11-22	30	<3 months	1	30	30	0	Yes	1	Unsuppressed	2	2019-12-06	14	44
50	IMPORTA-0129	1	2022-08-29	Asega Philip Poru	Juba Teaching Hospital	1	2019-12-12	30	Hai Gem	Married Monogamous	2	Housewife	1	3	3	43845	36	2	Known Pos on ART	2	1 visit	1	1	At Health Facility	1			Already on ART	1	2018-06-13	1c = TDF/3TC/DTG	3		2019-12-12	Pregnant	2020-03-13	92	3-5 months	2	90	90	0	Yes	1	Suppressed	1	2020-03-04	-9	83
51	IMPORTA-0130	1	2022-08-29	Asega Philip Poru	Juba Teaching Hospital	1	2019-12-20	22	Mangateen	Married Monogamous	2	Housewife	1	3	1	44014	9	1	Newly tested at ANC	1	1 visit	1	1	At home	2	Live Birth-LB	1	New on ART -- in pregnancy	2	2019-12-20	1c = TDF/3TC/DTG	3		2019-12-20	Pregnant	2020-01-19	30	<3 months	1	30	30	0	NA	3	NA	3	2020-01-30	11	41
52	IMPORTA-0131	1	2022-08-29	Asega Philip Poru	Juba Teaching Hospital	1	2019-12-23	24	Jebel suk	Married Monogamous	2	Business (Man/Women)/trader	2	2	3	44012	12	1	Newly tested at ANC	1	3 visits	3	3			Live Birth-LB	1	New on ART -- in pregnancy	2	2019-12-23	1c = TDF/3TC/DTG	3		2019-12-23	Pregnant	2020-03-23	91	3-5 months	2	90	90	0	NA	3	NA	3	2020-04-14	22	113
53	IMPORTA-0132	1	2022-08-31	Asega Philip Poru	Juba Teaching Hospital	1	2019-11-12	24	Shirikat	Married Monogamous	2	Housewife	1	1	2	43865			Newly tested at ANC	1	1 visit	1	1	At Health Facility	1	Live Birth-LB	1	New on ART -- in pregnancy	2	2019-11-12	1e = AZT/3TC+DTG	5		2019-11-12	Pregnant	2020-02-10	90	3-5 months	2	90	90	0	NA	3	NA	3	2020-09-30	233	323
54	IMPORTA-0133	1	2022-08-31	Asega Philip Poru	Juba Teaching Hospital	1	2020-01-08	21	Lologo	Married Monogamous	2	Housewife	1	2		44077	12	1	Known Pos on ART	2	1 visit	1	1	At Health Facility	1	Live Birth-LB	1	Already on ART	1	2017-02-24	1c = TDF/3TC/DTG	3		2020-01-08	Pregnant	2020-04-07	90	3-5 months	2	90	90	0	No	2	NA	3	2020-04-03	-4	86
55	IMPORTA-0134	1	2022-08-31	Asega Philip Poru	Juba Teaching Hospital	1	2020-01-16	28	Shirikat	Married Monogamous	2	Housewife	1			43992			Known Pos on ART	2	1 visit	1	1	At Health Facility	1	Live Birth-LB	1	Already on ART	1	2017-10-20	1c = TDF/3TC/DTG	3		2020-01-16	Pregnant	2020-04-15	90	3-5 months	2	90	90	0	Yes	1	Suppressed	1	2020-03-23	-23	67
56	IMPORTA-0135	1	2022-08-31	Asega Philip Poru	Juba Teaching Hospital	1	2020-01-15	30	Jebel suk	Married Monogamous	2	Business (Man/Women)/trader	2	3	3	44079	5	1	Newly tested at ANC	1	1 visit	1	1	At Health Facility	1	Live Birth-LB	1	New on ART -- in pregnancy	2	2020-01-15	1c = TDF/3TC/DTG	3		2020-01-15	Pregnant	2020-04-15	91	3-5 months	2	90	90	0	NA	3	NA	3	2020-04-14	-1	90
57	IMPORTA-0136	1	2022-08-31	Asega Philip Poru	Juba Teaching Hospital	1	2020-02-06	25	Hai Tijaria	Married Monogamous	2	Housewife	1	1	2	43933	28	2	Newly tested at ANC	1	2 visits	2	2	At home	2	Live Birth-LB	1	New on ART -- in pregnancy	2	2020-02-06	1c = TDF/3TC/DTG	3		2020-02-06	Pregnant	2020-05-06	90	3-5 months	2	90	90	0	NA	3	NA	3	2020-07-30	85	175
58	IMPORTA-0137	1	2022-08-31	Asega Philip Poru	Juba Teaching Hospital	1	2020-02-12	24	Nyakuron	Married Polygamous	2	Housewife	1	2	3	44003	20	2	Newly tested at ANC	1	3 visits	3	3	At Health Facility	1	Live Birth-LB	1	New on ART -- in pregnancy	2	2020-02-12	1c = TDF/3TC/DTG	3		2020-02-12	Pregnant	2020-05-12	90	3-5 months	2	90	90	0	NA	3	NA	3	2020-08-24	104	194
59	IMPORTA-0138	1	2022-08-31	Asega Philip Poru	Juba Teaching Hospital	1	2020-02-27	30	Gudele	Married Polygamous	2	Business (Man/Women)/trader	2	3	3	43967	28	2	Known Pos on ART	2				At Health Facility	1	Live Birth-LB	1	Already on ART	1	2020-08-03	1c = TDF/3TC/DTG	3		2020-02-27	Pregnant	2020-05-26	89	<3 months	1	90	90	0	Yes	1	Suppressed	1	2020-05-27	1	90
60	IMPORTA-0139	1	2022-08-31	Asega Philip Poru	Juba Teaching Hospital	1	2020-02-04	31	Gudele	Married Monogamous	2	Housewife	1	3		43936	28	2	Known Pos on ART	2						Live Birth-LB	1	Already on ART	1	2013-08-14	1c = TDF/3TC/DTG	3		2020-02-04	Pregnant	2020-05-04	90	3-5 months	2	90	90	0	Yes	1	Suppressed	1	2020-05-05	1	91
61	IMPORTA-0140	1	2022-08-31	Asega Philip Poru	Juba Teaching Hospital	1	2020-03-09	23	Jebel Dinka	Married Polygamous	2	Housewife	1	3		44137	5	1	Newly tested at ANC	1				At home	2	Live Birth-LB	1	New on ART -- in pregnancy	2		1c = TDF/3TC/DTG	3		2020-03-09	Pregnant	2020-06-09	92	3-5 months	2	90	90	0	No	2	NA	3	2020-04-27	-43	49
62	IMPORTA-0141	1	2022-08-31	Asega Philip Poru	Juba Teaching Hospital	1	2020-03-10	29	Shirikat	Married Monogamous	2	Business (Man/Women)/trader	2	3	3	43971	30	2	Known Pos on ART	2	2 visits	2	2	At Health Facility	1	Live Birth-LB	1	Already on ART	1	2019-02-02	1c = TDF/3TC/DTG	3		2020-03-10	Pregnant	2020-06-10	92	3-5 months	2	90	90	0	Yes	1	Unsuppressed	2	2020-05-11	-30	62
63	IMPORTA-0142	1	2022-08-31	Asega Philip Poru	Juba Teaching Hospital	1	2020-03-16	37	Hai Malakal	Married Polygamous	2	Business (Man/Women)/trader	2		3	44002	24	2	Known Pos on ART	2	2 visits	2	2	At Health Facility	1			Already on ART	1	2012-01-10	1c = TDF/3TC/DTG	3		2020-03-16	Pregnant	2020-09-15	183	6+ months	3	180	180	0	Yes	1	Suppressed	1	2020-09-09	-6	177
64	IMPORTA-0143	1	2022-08-31	Asega Philip Poru	Juba Teaching Hospital	1	2020-03-10	31	Tongping	Married Monogamous	2	Housewife	1	3	3	43932	36	2	Known Pos on ART	2	1 visit	1	1	At Health Facility	1	Live Birth-LB	1	Already on ART	1	2018-11-08	1c = TDF/3TC/DTG	3		2020-03-10	Pregnant	2020-06-08	90	3-5 months	2	90	90	0	Yes	1	Suppressed	1	2020-07-27	49	139
65	IMPORTA-0144	1	2022-08-31	Asega Philip Poru	Juba Teaching Hospital	1	2020-03-09	27	Mauna	Married Monogamous	2	Business (Man/Women)/trader	2		3	43988	23	2	Known Pos on ART	2	3 visits	3	3	At Health Facility	1	Live Birth-LB	1	Already on ART	1	2012-06-11	1c = TDF/3TC/DTG	3		2020-03-09	Pregnant	2020-09-27	202	6+ months	3	180	180	0	NA	3	NA	3	2020-09-26	-1	201
66	IMPORTA-0145	1	2022-08-31	Asega Philip Poru	Juba Teaching Hospital	1	2020-03-02	29	Tongping	Married Monogamous	2	Housewife	1	3	3	44114	16	2	Known Pos on ART	2	1 visit	1	1	At Health Facility	1	Live Birth-LB	1	Already on ART	1	2014-01-20	1c = TDF/3TC/DTG	3		2020-03-02	Pregnant	2020-08-31	182	6+ months	3	180	180	0	Yes	1	Suppressed	1	2020-08-05	-26	156
67	IMPORTA-0146	1	2022-08-31	Asega Philip Poru	Juba Teaching Hospital	1	2020-04-03	35	New site	Married Polygamous	2	Business (Man/Women)/trader	2	3	3	43953	34	2	Known Pos on ART	2	3 visits	3	3	At home	2	Live Birth-LB	1	Already on ART	1	2015-08-14	1c = TDF/3TC/DTG	3		2020-04-03	Pregnant	2021-02-02	305	6+ months	3	300	300	0	Yes	1	Suppressed	1	2021-04-29	86	391
68	IMPORTA-0147	1	2022-08-31	Asega Philip Poru	Juba Teaching Hospital	1	2020-06-08	23	Hai Amarat	Married Monogamous	2	Business (Man/Women)/trader	2	1	2	44192	12	1	Newly tested at ANC	1	3 visits	3	3			Live Birth-LB	1	New on ART -- in pregnancy	2	2020-06-08	1c = TDF/3TC/DTG	3		2020-06-08	Pregnant	2020-12-07	182	6+ months	3	180	180	0	NA	3	NA	3	2021-01-11	35	217
69	IMPORTA-0148	1	2022-08-31	Asega Philip Poru	Juba Teaching Hospital	1	2020-04-17	22	Hai Commercial	Married Polygamous	2	Housewife	1	3	1	44020	28	2	Newly tested at ANC	1	2 visits	2	2	At Health Facility	1	Live Birth-LB	1	New on ART -- in pregnancy	2	2020-04-17	1c = TDF/3TC/DTG	3		2020-04-14	Pregnant	2020-10-16	185	6+ months	3	180	180	0	NA	3	NA	3	2020-10-15	-1	184
70	IMPORTA-0149	1	2022-08-31	Asega Philip Poru	Juba Teaching Hospital	1	2020-04-03	26	Atlabara	Married Monogamous	2	Housewife	1	3			15	1	Known Pos on ART	2	3 visits	3	3	At Health Facility	1	Live Birth-LB	1	Already on ART	1	2014-05-05	1c = TDF/3TC/DTG	3		2020-04-03	Pregnant	2020-10-02	182	6+ months	3	180	180	0	Yes	1	Suppressed	1	2021-10-07	370	552
71	IMPORTA-0150	1	2022-08-31	Asega Philip Poru	Juba Teaching Hospital	1	2020-04-20	28	Shirikat	Married Monogamous	2	Business (Man/Women)/trader	2	1	2	44096	16	2	Known Pos on ART	2	4 or more visits	4	3	At Health Facility	1	Still Birth-MSB or FSB	2	Already on ART	1	2020-06-20	1c = TDF/3TC/DTG	3		2020-04-20	Pregnant	2020-10-19	182	6+ months	3	180	180	0	Yes	1	Suppressed	1	2020-10-21	2	184
72	IMPORTA-0151	1	2022-08-31	Asega Philip Poru	Juba Teaching Hospital	1	2020-04-22	38	Gudele 1	Married Monogamous	2	Business (Man/Women)/trader	2	3	3	44126	16	2	Known Pos on ART	2	3 visits	3	3	At Health Facility	1	Live Birth-LB	1	Already on ART	1	2018-11-26	1c = TDF/3TC/DTG	3		2020-04-22	Pregnant	2020-11-02	194	6+ months	3	180	180	0	No	2	NA	3	2020-10-30	-3	191
73	IMPORTA-0152	1	2022-09-01	Asega Philip Poru	Juba Teaching Hospital	1	2020-06-26	23	Mauna			Housewife	1	1	3	44153			Known Pos on ART	2				At Health Facility	1	Live Birth-LB	1	Already on ART	1	2015-02-04	1c = TDF/3TC/DTG	3		2020-06-26	Pregnant	2020-12-27	184	6+ months	3	180	180	0	Yes	1	Unsuppressed	2	2021-02-09	44	228
74	IMPORTA-0153	1	2022-09-01	Asega Philip Poru	Juba Teaching Hospital	1	2020-03-10	29	Tongping	Married Monogamous	2	Housewife	1	2	3	43998	20	2	Known Pos on ART	2				At Health Facility	1	Live Birth-LB	1	Already on ART	1	2018-03-14	1c = TDF/3TC/DTG	3		2020-03-10	Pregnant	2020-06-10	92	3-5 months	2	90	90	0	Yes	1	Suppressed	1	2020-06-04	-6	86
75	IMPORTA-0154	1	2022-09-01	Asega Philip Poru	Juba Teaching Hospital	1	2020-04-20	29	Gudele	Married Monogamous	2	Housewife	1	2	3	44058	16	2	Known Pos on ART	2	3 visits	3	3	At Health Facility	1			Already on ART	1	2016-04-14	1c = TDF/3TC/DTG	3		2020-04-20	Pregnant	2020-09-18	151	3-5 months	2	150	150	0	Yes	1	Suppressed	1	2020-10-07	19	170
76	IMPORTA-0155	1	2022-09-01	Asega Philip Poru	Juba Teaching Hospital	1	2020-04-28	26	Gumbo	Married Monogamous	2	Housewife	1			44097	18	2	Newly tested at ANC	1	1 visit	1	1	At Health Facility	1	Live Birth-LB	1	New on ART -- in pregnancy	2	2020-04-28	1c = TDF/3TC/DTG	3		2020-04-28	Pregnant	2020-10-28	183	6+ months	3	180	180	0	NA	3	NA	3	2020-12-01	34	217
77	IMPORTA-0156	1	2022-09-01	Asega Philip Poru	Juba Teaching Hospital	1	2020-05-04	34	Shirikat	Married Monogamous	2	Business (Man/Women)/trader	2	2	3	44162	12	1	Newly tested at ANC	1	1 visit	1	1	At Health Facility	1	Live Birth-LB	1	New on ART -- in pregnancy	2	2020-05-04	1c = TDF/3TC/DTG	3		2020-05-04	Pregnant	2020-11-02	182	6+ months	3	180	180	0	NA	3	NA	3	2020-09-09	-54	128
78	IMPORTA-0157	1	2022-09-01	Asega Philip Poru	Juba Teaching Hospital	1	2020-05-08	28	Shirikat	Married Polygamous	2	Student	1	3	3	44058	26	2	Newly tested at ANC	1	3 visits	3	3	At Health Facility	1	Live Birth-LB	1	New on ART -- in pregnancy	2	2020-05-08	1c = TDF/3TC/DTG	3		2020-05-08	Pregnant	2020-11-06	182	6+ months	3	180	180	0	NA	3	NA	3	2020-11-09	3	185
79	IMPORTA-0158	1	2022-09-01	Asega Philip Poru	Juba Teaching Hospital	1	2020-05-14	35	Temergia	Married Polygamous	2	Housewife	1	3	3	43976	36	2	Newly tested at ANC	1				At Health Facility	1	Live Birth-LB	1	New on ART -- in pregnancy	2	2020-05-14	1c = TDF/3TC/DTG	3		2020-05-14	Pregnant	2020-11-13	183	6+ months	3	180	180	0	NA	3	NA	3	2020-09-10	-64	119
80	IMPORTA-0159	1	2022-09-01	Asega Philip Poru	Juba Teaching Hospital	1	2020-05-27	18	Hai Tijaria	Married Monogamous	2	Housewife	1	3		44106	20	2	Newly tested at ANC	1	3 visits	3	3	At Health Facility	1	Live Birth-LB	1	New on ART -- in pregnancy	2	2020-05-27	1c = TDF/3TC/DTG	3		2020-05-27	Pregnant	2020-11-25	182	6+ months	3	180	180	0	NA	3	NA	3	2020-10-12	-44	138
81	IMPORTA-0160	1	2022-09-01	Asega Philip Poru	Juba Teaching Hospital	1	2020-07-01	20	Gudele 2	Married Monogamous	2	Housewife	1	2	1	44076	20	2	Newly tested at ANC	1	2 visits	2	2	At Health Facility	1	Live Birth-LB	1	New on ART -- in pregnancy	2	2020-07-01	1c = TDF/3TC/DTG	3		2020-07-01	Pregnant	2020-12-30	182	6+ months	3	180	180	0	NA	3	NA	3	2020-10-20	-71	111
82	IMPORTA-0161	1	2022-09-01	Asega Philip Poru	Juba Teaching Hospital	1	2020-08-07	27	Munuki	Married Monogamous	2	Housewife	1	1	2	44151	20	2	Known Pos on ART	2	4 or more visits	4	3	At Health Facility	1	Live Birth-LB	1	Already on ART	1	2015-12-12	1c = TDF/3TC/DTG	3		2020-08-07	Pregnant	2020-10-19	73	<3 months	1	90	90	0	Yes	1	Suppressed	1	2020-10-20	1	74
83	IMPORTA-0162	1	2022-09-01	Asega Philip Poru	Juba Teaching Hospital	1	2020-08-10	23	Gorom	Married Monogamous	2	Housewife	1	1	2	44135			Known Pos on ART	2	2 visits	2	2	At Health Facility	1	Live Birth-LB	1	Already on ART	1	2014-07-23	1c = TDF/3TC/DTG	3		2020-08-10	Pregnant	2021-02-09	183	6+ months	3	180	180	0	Yes	1	Suppressed	1	2021-02-22	13	196
84	IMPORTA-0163	1	2022-09-01	Asega Philip Poru	Juba Teaching Hospital	1	2020-07-20	24	Gumbo	Married Polygamous	2	Housewife	1	4	1	44155	22	2	Newly tested at ANC	1				At home	2	Live Birth-LB	1	New on ART -- in pregnancy	2	2020-07-20	1c = TDF/3TC/DTG	3		2020-07-20	Pregnant	2021-01-18	182	6+ months	3	180	180	0	NA	3	NA	3	2020-09-17	-123	59
85	IMPORTA-0164	1	2022-09-01	Asega Philip Poru	Juba Teaching Hospital	1	2020-07-27	32	Munuki	Married Polygamous	2	Housewife	1	3	3	44159			Newly tested at ANC	1	3 visits	3	3	At Health Facility	1	Live Birth-LB	1	New on ART -- in pregnancy	2	2020-07-27	1c = TDF/3TC/DTG	3		2020-07-27	Pregnant	2021-01-27	184	6+ months	3	180	180	0	NA	3	NA	3	2021-01-28	1	185
86	IMPORTA-0165	1	2022-09-02	Asega Philip Poru	Juba Teaching Hospital	1	2020-09-11	27	Munuki	Married Monogamous	2	Business (Man/Women)/trader	2	2	3	44159	28	2	Newly tested at ANC	1	2 visits	2	2	At Health Facility	1	Live Birth-LB	1	New on ART -- in pregnancy	2	2020-09-11	1d = ABC/3TC (600/300) /DTG	4		2020-09-11	Pregnant	2021-03-09	179	3-5 months	2	180	180	0	NA	3	NA	3	2021-03-19	10	189
87	IMPORTA-0166	1	2022-09-02	Asega Philip Poru	Juba Teaching Hospital	1	2020-09-16	25	Gudele	Married Monogamous	2	Housewife	1	3	3	44143	28	2	Known Pos on ART	2	2 visits	2	2	At Health Facility	1	Live Birth-LB	1	Already on ART	1	2019-10-20	1c = TDF/3TC/DTG	3		2020-09-16	Pregnant	2021-03-12	177	3-5 months	2	180	180	0	Yes	1	Suppressed	1	2021-04-07	26	203
88	IMPORTA-0167	1	2022-09-02	Asega Philip Poru	Juba Teaching Hospital	1	2020-09-01	31	Gudele	Married Polygamous	2	Housewife	1			44214	24	2	Newly tested at ANC	1	2 visits	2	2			Live Birth-LB	1	New on ART -- in pregnancy	2	2020-09-01	1c = TDF/3TC/DTG	3		2020-09-01	Pregnant	2021-03-01	181	6+ months	3	180	180	0	NA	3	NA	3	2021-03-02	1	182
89	IMPORTA-0168	1	2022-09-02	Asega Philip Poru	Juba Teaching Hospital	1	2020-09-04	24	Malakia	Married Monogamous	2	Salaried Employee	2	2		44303	20	2	Known Pos on ART	2	1 visit	1	1	At Health Facility	1	Live Birth-LB	1	Already on ART	1	2018-02-05	1c = TDF/3TC/DTG	3		2020-09-04	Pregnant	2021-03-03	180	6+ months	3	180	180	0	Yes	1	Suppressed	1	2021-03-31	28	208
110	IMPORTA-0169	1	2022-09-01	Arach Maker Arach	Rumbek Hospital	2	2020-10-26	30	Akuach			Housewife	1	5	3	44197			Newly tested at ANC	1	1 visit	1	1	At home	2	Live Birth-LB	1	New on ART -- in pregnancy	2	2020-10-26	1c = TDF/3TC/DTG	3		2020-10-26	Pregnant	2021-04-26	182	6+ months	3	180	180	0	No	2	NA	3	2021-04-26	0	182
111	IMPORTA-0170	1	2022-09-01	Arach Maker Arach	Rumbek Hospital	2	2020-10-19	20	Malual Akan	Married Polygamous	2						38	2	Known Pos on ART	2				At Health Facility	1	Live Birth-LB	1	Already on ART	1	2020-10-19	1c = TDF/3TC/DTG	3		2020-10-19	Pregnant	2021-04-19	182	6+ months	3	180	169	11	Yes	1	Suppressed	1	2021-04-08	-11	171
112	IMPORTA-0171	1	2022-09-01	Arach Maker Arach	Rumbek Hospital	2	2020-10-19	28	Malakia			Housewife	1	2			12	1	Known Pos on ART	2	1 visit	1	1	At home	2	Live Birth-LB	1	Already on ART	1	2019-03-01	1c = TDF/3TC/DTG	3		2020-10-19	Breastfeeding	2021-04-19	182	6+ months	3	180	180	0	Yes	1	Suppressed	1	2021-04-19	0	182
113	IMPORTA-0172	1	2022-09-01	Arach Maker Arach	Rumbek Hospital	2	2020-10-02	25	Ager gum						5	44287			Known Pos on ART	2				At Health Facility	1	Live Birth-LB	1			2019-11-04	1c = TDF/3TC/DTG	3		2020-10-02	Pregnant	2021-04-02	182	6+ months	3	180	180	0	Yes	1	Suppressed	1	2021-04-02	0	182
114	IMPORTA-0173	1	2022-09-01	Arach Maker Arach	Rumbek Hospital	2	2020-10-01	30	Nyot tik Angui	Married Polygamous	2	Housewife	1	1	3		12	1	Known Pos on ART	2	2 visits	2	2	At home	2			Already on ART	1	2019-02-19	1c = TDF/3TC/DTG	3		2020-10-01	Pregnant	2021-04-01	182	6+ months	3	180	150	30	Yes	1	Suppressed	1	2021-09-30	182	364
115	IMPORTA-0174	1	2022-09-01	Arach Maker Arach	Rumbek Hospital	2	2020-09-25	25	Jiir			Farming	2	2					Known Pos on ART	2				At Health Facility	1			Already on ART	1	2018-06-18	1c = TDF/3TC/DTG	3		2020-09-25	Breastfeeding	2021-03-25	181	6+ months	3	180	180	0	Yes	1	Suppressed	1	2021-03-25	0	181
116	IMPORTA-0175	1	2022-09-01	Arach Maker Arach	Rumbek Hospital	2	2020-09-23	24	Akuach	Single (never married)	1			2	4	44188	8	1			2 visits	2	2	At Health Facility	1	Live Birth-LB	1	Already on ART	1	2017-02-15	1c = TDF/3TC/DTG	3		2020-09-23	Pregnant	2021-09-23	365	6+ months	3	180	185	-5	Yes	1	Suppressed	1	2020-09-28	-360	5
117	IMPORTA-0176	1	2022-09-01	Arach Maker Arach	Rumbek Hospital	2	2020-09-23	30	Riakdor			Farming	2		3	44142	20	2	Known Pos on ART	2	2 visits	2	2	At Health Facility	1	Live Birth-LB	1			2018-10-18	1c = TDF/3TC/DTG	3		2020-09-23	Pregnant	2021-03-03	161	3-5 months	2	180	180	0	Yes	1	Suppressed	1	2021-03-24	21	182
118	IMPORTA-0177	1	2022-09-01	Arach Maker Arach	Rumbek Hospital	2	2020-10-17	27	Makuach					5		44151	20	2	Known Pos on ART	2	1 visit	1	1	At home	2	Live Birth-LB	1	New on ART -- in pregnancy	2	2018-06-22	1f = TDF/3TC/EFV	6		2020-09-17	Pregnant	2021-03-17	181	6+ months	3	180	180	0	Yes	1	Suppressed	1	2021-03-13	-4	177
119	IMPORTA-0178	1	2022-09-01	Arach Maker Arach	Rumbek Hospital	2	2020-09-11	33	malual			Farming	2	6	3		11	1	Known Pos on ART	2				At Health Facility	1	Live Birth-LB	1	Already on ART	1	2013-08-13	1c = TDF/3TC/DTG	3		2020-09-11	Pregnant	2020-12-11	91	3-5 months	2	90	76	14	Yes	1	Suppressed	1	2020-11-27	-14	77
120	IMPORTA-0179	1	2022-09-02	Arach Maker Arach	Rumbek Hospital	2	2021-09-07	28	Mabor ngap			Farming	2	5		44478	33	2	Newly tested at ANC	1				At Health Facility	1	Live Birth-LB	1	New on ART -- in pregnancy	2	2021-09-07	1c = TDF/3TC/DTG	3		2021-09-07	Pregnant	2022-03-07	181	6+ months	3	180	139	41	No	2	NA	3	2022-01-26	-40	141
121	IMPORTA-0180	1	2022-09-02	Arach Maker Arach	Rumbek Hospital	2	2021-09-07	17	Pan barkou			Farming	2	4		44668	30	2	Newly tested at ANC	1				At home	2	Live Birth-LB	1	New on ART -- in pregnancy	2	2021-09-07	1c = TDF/3TC/DTG	3		2021-09-07	Pregnant	2022-03-07	181	6+ months	3	180	180	0	No	2	NA	3	2022-03-10	3	184
122	IMPORTA-0181	1	2022-09-02	Arach Maker Arach	Rumbek Hospital	2	2021-09-08	20	Malual bab						4	44684	6	1	Known Pos on ART	2	2 visits	2	2	At Health Facility	1	Live Birth-LB	1	Already on ART	1	2021-08-07	1c = TDF/3TC/DTG	3		2021-09-08	Pregnant	2022-03-08	181	6+ months	3	180	186	-6	Yes	1	Suppressed	1		44628
123	IMPORTA-0182	1	2022-09-02	Arach Maker Arach	Rumbek Hospital	2	2021-09-30	19	Cuei Gaak			Housewife	1	4		44483	25	2	Newly tested at ANC	1	2 visits	2	2			Live Birth-LB	1	New on ART -- in pregnancy	2	2021-09-30	1c = TDF/3TC/DTG	3		2021-09-30	Pregnant	2022-03-30	181	6+ months	3	180	243	-63	NA	3	NA	3		44650
124	IMPORTA-0183	1	2022-09-02	Arach Maker Arach	Rumbek Hospital	2	2021-09-29	34	Achol theen			Housewife	1	4	2		25	2			2 visits	2	2	At Health Facility	1	Live Birth-LB	1	Already on ART	1	2022-09-26	1c = TDF/3TC/DTG	3		2021-09-29	Breastfeeding	2022-03-29	181	6+ months	3	180	142	38	Yes	1	Suppressed	1	2022-01-01	-87	94
125	IMPORTA-0184	1	2022-09-02	Arach Maker Arach	Rumbek Hospital	2	2021-09-17	25	malual bab			Housewife	1						Newly tested at ANC	1				At Health Facility	1	Live Birth-LB	1	New on ART -- in pregnancy	2	2021-09-17	1c = TDF/3TC/DTG	3		2021-09-17	Pregnant	2022-03-17	181	6+ months	3	180	180	0	No	2	NA	3		44637
126	IMPORTA-0185	1	2022-09-02	Arach Maker Arach	Rumbek Hospital	2	2021-09-23	21	Pachong			Farming	2	5	3		25	2	Known Pos on ART	2	1 visit	1	1	At Health Facility	1	Live Birth-LB	1	Already on ART	1	2017-08-06	1c = TDF/3TC/DTG	3		2021-09-23	Pregnant	2022-03-23	181	6+ months	3	180	192	-12	Yes	1	Suppressed	1	2022-04-05	13	194
127	IMPORTA-0186	1	2022-09-02	Arach Maker Arach	Rumbek Hospital	2	2021-10-11	25	Akuach			Housewife	1	4	5	44593			Newly tested at ANC	1	1 visit	1	1	At Health Facility	1	Live Birth-LB	1	New on ART -- in pregnancy	2	2021-10-11	1c = TDF/3TC/DTG	3		2021-10-11	Pregnant	2022-04-11	182	6+ months	3	180	204	-24	No	2	NA	3		44662
128	IMPORTA-0187	1	2022-09-02	Arach Maker Arach	Rumbek Hospital	2	2021-10-12	28	Bros			Housewife	1	6	2		28	2	Known Pos on ART	2	1 visit	1	1	At home	2	Live Birth-LB	1	Already on ART	1	2017-07-24	1c = TDF/3TC/DTG	3		2021-10-12	Pregnant	2022-04-12	182	6+ months	3	180	210	-30	Yes	1	Suppressed	1		44663
129	IMPORTA-0188	1	2022-09-02	Arach Maker Arach	Rumbek Hospital	2	2021-10-15	20	Akuach			Housewife	1	4		44601	27	2	Known Pos on ART	2	2 visits	2	2	At home	2	Live Birth-LB	1	Already on ART	1	2017-11-06	1c = TDF/3TC/DTG	3		2021-10-15	Pregnant	2022-04-15	182	6+ months	3	180	179	1	Yes	1	Suppressed	1		44666
130	IMPORTA-0189	1	2022-09-02	Arach Maker Arach	Rumbek Hospital	2	2021-10-21	27	Akuach			Housewife	1	3			25	2	Known Pos on ART	2	2 visits	2	2	At home	2	Live Birth-LB	1	Already on ART	1	2018-03-19	1c = TDF/3TC/DTG	3		2021-10-21	Breastfeeding	2022-04-21	182	6+ months	3	180	180	0						44672
131	IMPORTA-0190	1	2022-09-02	Arach Maker Arach	Rumbek Hospital	2	2021-10-22	35	makuach			Housewife	1	6			11	1	Known Pos not on ART	2						Live Birth-LB	1			2021-10-21	1c = TDF/3TC/DTG	3		2021-10-22	Breastfeeding	2022-04-22	182	6+ months	3	180	180	0	No	2	NA	3	2022-04-19	-3	179
132	IMPORTA-0191	1	2022-09-02	Arach Maker Arach	Rumbek Hospital	2	2021-10-27	32	Akuach					1	2		12	1	Newly tested at ANC	1	1 visit	1	1	At Health Facility	1	Live Birth-LB	1	New on ART -- in pregnancy	2	2021-10-27	1c = TDF/3TC/DTG	3		2021-10-27	Pregnant	2022-04-27	182	6+ months	3	180	220	-40	No	2	NA	3		44678
133	IMPORTA-0192	1	2022-09-02	Arach Maker Arach	Rumbek Hospital	2	2021-10-10	23	Makurieric			Housewife	1	4	3	44526	32	2			1 visit	1	1	At Health Facility	1	Live Birth-LB	1	New on ART -- in pregnancy	2	2021-10-29	1c = TDF/3TC/DTG	3		2021-10-29	Breastfeeding	2022-04-29	182	6+ months	3	180	210	-30	No	2	NA	3	2022-05-30	31	213
134	IMPORTA-0193	1	2022-09-02	Arach Maker Arach	Rumbek Hospital	2	2021-10-29	24	Deng Nhia			Housewife	1	5	3		22	2	Known Pos not on ART	2	1 visit	1	1	At Health Facility	1	Live Birth-LB	1	New on ART -- in pregnancy	2	2021-08-30	1c = TDF/3TC/DTG	3		2021-10-29	Pregnant	2022-04-25	178	3-5 months	2	180	206	-26	Yes	1	Suppressed	1	2022-04-25	0	178
135	IMPORTA-0194	1	2022-09-02	Arach Maker Arach	Rumbek Hospital	2	2021-11-05	21	Malual bab					1	2		22	2	Known Pos on ART	2				At Health Facility	1	Live Birth-LB	1	Already on ART	1	2019-02-06	1c = TDF/3TC/DTG	3		2021-11-05	Breastfeeding	2022-05-05	181	6+ months	3	180	144	36	Yes	1	Unsuppressed	2		44686
136	IMPORTA-0195	1	2022-09-02	Arach Maker Arach	Rumbek Hospital	2	2021-11-08	30	Akuach			Housewife	1	3			32	2	Known Pos on ART	2	2 visits	2	2	At Health Facility	1	Live Birth-LB	1	Already on ART	1	2018-11-06	1c = TDF/3TC/DTG	3		2021-11-08	Pregnant	2022-05-08	181	6+ months	3	180	202	-22	Yes	1	Suppressed	1		44689
137	IMPORTA-0196	1	2022-09-02	Arach Maker Arach	Rumbek Hospital	2	2021-11-11	21	Malual kodi			Farming	2	1					Newly tested at ANC	1	2 visits	2	2	At Health Facility	1			New on ART -- in pregnancy	2	2021-11-11	1c = TDF/3TC/DTG	3		2021-11-11	Pregnant	2022-05-11	181	6+ months	3	180	196	-16	No	2	NA	3		44692
138	IMPORTA-0197	1	2022-09-02	Arach Maker Arach	Rumbek Hospital	2	2021-11-12	21	Akuach			Housewife	1	1	3				Known Pos on ART	2				At Health Facility	1	Live Birth-LB	1	Already on ART	1	2018-08-06	1c = TDF/3TC/DTG	3		2021-11-12	Breastfeeding	2022-05-12	181	6+ months	3	180	187	-7	No	2	NA	3		44693
139	IMPORTA-0198	1	2022-09-02	Arach Maker Arach	Rumbek Hospital	2	2021-11-17	28	Malakia			Housewife	1	4	3		9	1	Newly tested at ANC	1				At Health Facility	1			Already on ART	1	2021-08-31	1c = TDF/3TC/DTG	3		2021-11-17	Breastfeeding	2022-05-17	181	6+ months	3	180	120	60	Yes	1	Suppressed	1		44698
140	IMPORTA-0199	1	2022-09-02	Arach Maker Arach	Rumbek Hospital	2	2021-11-18	30	Akot			Housewife	1			44588	24	2	Newly tested at ANC	1	2 visits	2	2	At home	2	Live Birth-LB	1	New on ART -- in pregnancy	2	2021-11-18	1c = TDF/3TC/DTG	3		2021-11-18	Pregnant	2022-05-18	181	6+ months	3	180	284	-104	No	2	NA	3		44699
141	IMPORTA-0200	1	2022-09-02	Arach Maker Arach	Rumbek Hospital	2	2021-11-22	20	Malual kodi	Married Polygamous	2	Housewife	1	4	4		18	2	Known Pos on ART	2	1 visit	1	1	At Health Facility	1	Live Birth-LB	1	Already on ART	1	2019-08-27	1c = TDF/3TC/DTG	3		2021-11-22	Pregnant	2022-05-23	182	6+ months	3	180	187	-7	Yes	1	Suppressed	1		44704
1	IMPORTA-0201	1	2022-08-31	Lubang Jack Simaya	Maridi Hospital	3	2019-10-15	19	Kaluan	Married Polygamous	2	Housewife	1	1	2	43994	5	1	Known Pos on ART	2	2 visits	2	2	At Health Facility	1	Live Birth-LB	1	Already on ART	1	2018-05-29	1c = TDF/3TC/DTG	3		2019-09-27	Pregnant	2020-02-04	130	3-5 months	2	30	30	0	No	2	NA	3	2020-02-04	0	130
2	IMPORTA-0202	1	2022-08-31	Lubang Jack Simaya	Maridi Hospital	3	2019-10-22	30	malakia	Married Polygamous	2	Military Personnel	2	3	3		38	2	Known Pos on ART	2	1 visit	1	1	At Health Facility	1	Live Birth-LB	1	Already on ART	1	2016-12-12	1c = TDF/3TC/DTG	3		2019-10-03	Pregnant	2019-12-31	89	<3 months	1	90	90	0	No	2	NA	3	2019-12-31	0	89
3	IMPORTA-0203	1	2022-08-31	Lubang Jack Simaya	Maridi Hospital	3	2019-10-23	22	Moko 1	Married Monogamous	2	Housewife	1		3	43891	22	2	Known Pos on ART	2	2 visits	2	2	At home	2	Live Birth-LB	1	Already on ART	1	2019-03-08	1c = TDF/3TC/DTG	3		2019-10-02	Pregnant	2019-12-31	90	3-5 months	2	90	90	0	Yes	1	Suppressed	1	2019-12-31	0	90
4	IMPORTA-0204	1	2022-08-31	Lubang Jack Simaya	Maridi Hospital	3	2019-10-31	20	Rastigi	Married Monogamous	2	Housewife	1	3	3				Known Pos on ART	2	1 visit	1	1	At Health Facility	1	Live Birth-LB	1			2019-06-06	1c = TDF/3TC/DTG	3		2019-10-22	Pregnant	2019-11-19	28	<3 months	1	30	30	0	No	2	NA	3	2019-11-19	0	28
5	IMPORTA-0205	1	2022-08-31	Lubang Jack Simaya	Maridi Hospital	3	2019-10-22	22	Sika Rumbek	Married Monogamous	2			3	3	43983	20	2	Newly tested at ANC	1	4 or more visits	4	3	At Health Facility	1			New on ART -- in pregnancy	2	2019-10-22	1c = TDF/3TC/DTG	3		2019-10-22	Pregnant	2019-11-21	30	<3 months	1	90	90	0	No	2	NA	3	2019-11-21	0	30
6	IMPORTA-0206	1	2022-08-31	Lubang Jack Simaya	Maridi Hospital	3	2019-11-26	28	Hai Gabat	Married Monogamous	2	Farming	2	3	3	43935								At Health Facility	1	Live Birth-LB	1	Already on ART	1	2017-09-28	1c = TDF/3TC/DTG	3		2019-11-26	Pregnant	2020-03-29	124	3-5 months	2	180	180	0	No	2	NA	3	2020-03-29	0	124
7	IMPORTA-0207	1	2022-08-31	Lubang Jack Simaya	Maridi Hospital	3	2019-11-27	32	Degirisufu	Married Polygamous	2	Farming	2	3	3		12	1	Known Pos on ART	2	2 visits	2	2	At home	2	Live Birth-LB	1	Already on ART	1	2015-11-21	1c = TDF/3TC/DTG	3		2019-08-05	Pregnant	2020-02-12	191	6+ months	3	174	90	84	No	2	NA	3	2020-02-12	0	191
8	IMPORTA-0208	1	2022-08-31	Lubang Jack Simaya	Maridi Hospital	3	2019-11-18	21	Hai Gabat	Married Monogamous	2	Housewife	1	3	3	43871			Newly tested at ANC	1	2 visits	2	2	At Health Facility	1	Live Birth-LB	1			2019-11-18	1c = TDF/3TC/DTG	3		2019-11-18	Pregnant	2019-12-20	32	<3 months	1	30	30	0	No	2	NA	3	2019-12-20	0	32
9	IMPORTA-0209	1	2022-08-31	Lubang Jack Simaya	Maridi Hospital	3	2019-12-03	26	Hai Tharaua	Married Polygamous	2			2	3	43955	18	2	Known Pos on ART	2	2 visits	2	2	At Health Facility	1	Neonatal Death-ND	3	Already on ART	1	2017-09-28	1c = TDF/3TC/DTG	3		2019-12-03	Pregnant	2020-02-14	73	<3 months	1	90	90	0	Yes	1	Unsuppressed	2	2020-02-14	0	73
10	IMPORTA-0210	1	2022-08-31	Lubang Jack Simaya	Maridi Hospital	3	2019-12-19	32	Gabat	Married Monogamous	2	Housewife	1	3	3	43982	20	2	Known Pos on ART	2	2 visits	2	2	At Health Facility	1	Live Birth-LB	1	Already on ART	1	2017-12-15	1c = TDF/3TC/DTG	3		2019-12-19	Pregnant	2020-03-23	95	3-5 months	2	90	90	0	No	2	NA	3	2020-03-23	0	95
11	IMPORTA-0211	1	2022-08-31	Lubang Jack Simaya	Maridi Hospital	3	2019-12-17	22	Malakia	Married Monogamous	2	Housewife	1	3	3		13	1	Newly tested at ANC	1	3 visits	3	3	At Health Facility	1	Live Birth-LB	1	New on ART -- in pregnancy	2	2019-12-17	1c = TDF/3TC/DTG	3		2019-12-17	Pregnant	2020-02-07	52	<3 months	1	50	30	20	No	2	NA	3	2019-02-07	-365
12	IMPORTA-0212	1	2022-08-01	Lubang Jack Simaya	Maridi Hospital	3	2019-12-05	24	Armia	Married Polygamous	2	Farming	2	3	3	43973	14	1	Known Pos on ART	2				At Health Facility	1	Live Birth-LB	1	Already on ART	1	2019-12-05	1c = TDF/3TC/DTG	3		2019-12-05	Pregnant	2020-01-03	29	<3 months	1	30	30	0	No	2	NA	3	2020-01-03	0	29
13	IMPORTA-0213	1	2022-09-01	Lubang Jack Simaya	Maridi Hospital	3	2019-12-03	26	Gabat	Married Monogamous	2	Other Uniformed forces (Police, Wildlife, Prisons, Fire Brigade)	2	1	2	44042	5	1	Known Pos on ART	2	2 visits	2	2	At Health Facility	1	Live Birth-LB	1	Already on ART	1	2019-04-10	1c = TDF/3TC/DTG	3		2019-12-03	Pregnant	2020-06-18	198	6+ months	3	192	180	12	Yes				2019-06-18	-366
14	IMPORTA-0214	1	2022-09-01	Lubang Jack Simaya	Maridi Hospital	3	2020-01-02	20	Malakia	Married Monogamous	2	Student	1	1	1	43945	25	2	Newly tested at ANC	1	1 visit	1	1	At Health Facility	1	Live Birth-LB	1	New on ART -- in pregnancy	2	2020-01-02	1c = TDF/3TC/DTG	3		2020-01-02	Pregnant	2020-01-31	29	<3 months	1	30	30	0	No	2	NA	3	2020-01-31	0	29
15	IMPORTA-0215	1	2022-09-01	Lubang Jack Simaya	Maridi Hospital	3	2020-01-16	26	Araka	Married Monogamous	2	Housewife	1	3	3	43912			Known Pos on ART	2	1 visit	1	1	At home	2	Live Birth-LB	1	New on ART -- in pregnancy	2	2015-11-01	1c = TDF/3TC/DTG	3		2020-01-27	Pregnant	2020-04-29	93	3-5 months	2	90	90	0	Yes				2020-04-29	0	93
16	IMPORTA-0216	1	2022-01-05	Lubang Jack Simaya	Maridi Hospital	3	2020-01-21	28	Mabilirindi	Married Monogamous	2	Farming	2	3	3		25	2	Known Pos on ART	2	1 visit	1	1	At Health Facility	1	Live Birth-LB	1	Already on ART	1	2015-12-14	1c = TDF/3TC/DTG	3		2020-01-21	Pregnant	2020-04-20	90	3-5 months	2	90	90	0	Yes				2020-04-20	0	90
17	IMPORTA-0217	1	2022-09-01	Lubang Jack Simaya	Maridi Hospital	3	2020-01-24	21	Munguo	Married Monogamous	2	Housewife	1	2	3	44048	12	1	Newly tested at ANC	1	2 visits	2	2	At home	2	Live Birth-LB	1	New on ART -- in pregnancy	2	2020-01-24	1c = TDF/3TC/DTG	3		2020-01-24	Pregnant	2020-02-27	34	<3 months	1	33	30	3	No	2	NA	3	2020-02-27	0	34
18	IMPORTA-0218	1	2022-09-01	Lubang Jack Simaya	Maridi Hospital	3	2020-01-28	23	Malakia	Married Monogamous	2	Housewife	1	2	3	43996			Known Pos on ART	2	2 visits	2	2	At Health Facility	1	Live Birth-LB	1	Already on ART	1	2018-03-01	1c = TDF/3TC/DTG	3		2019-01-28	Pregnant	2020-04-28	456	6+ months	3	90	90	0	Yes				2020-04-28	0	456
19	IMPORTA-0219	1	2020-09-01	Lubang Jack Simaya	Maridi Hospital	3	2020-01-31	28	Mongua	Married Monogamous	2	Housewife	1	2	3	44060	8	1			2 visits	2	2	At Health Facility	1	Live Birth-LB	1	Already on ART	1	2018-05-30	1c = TDF/3TC/DTG	3		2020-01-31	Pregnant	2020-05-11	101	3-5 months	2	100	90	10	Yes				2020-05-11	0	101
20	IMPORTA-0220	1	2022-09-01	Lubang Jack Simaya	Maridi Hospital	3	2020-05-05	27	Mboroko	Married Monogamous	2	Housewife	1	3	3	43984	19	2	Known Pos on ART	2	2 visits	2	2	At home	2	Live Birth-LB	1	Already on ART	1	2018-05-02	1c = TDF/3TC/DTG	3		2020-02-05	Pregnant	2020-05-11	96	3-5 months	2	96	90	6	Yes				2020-05-11	0	96
21	IMPORTA-0221	1	2021-09-01	Lubang Jack Simaya	Maridi Hospital	3	2020-02-12	16	Mboroko	Married Monogamous	2	Farming	2	1	1	44116	12	1	Known Pos on ART	2	2 visits	2	2	At Health Facility	1	Live Birth-LB	1	Already on ART	1	2019-06-19	1c = TDF/3TC/DTG	3		2020-02-12	Pregnant	2020-04-01	49	<3 months	1	90	90	0	Yes				2020-04-01	0	49
22	IMPORTA-0222	1	2022-09-01	Lubang Jack Simaya	Maridi Hospital	3	2020-03-13	30	Sika Rumbek	Married Monogamous	2			3	3	43930	37	2	Newly tested at ANC	1	1 visit	1	1	At Health Facility	1			New on ART -- in pregnancy	2	2020-03-13	1c = TDF/3TC/DTG	3		2020-03-13	Pregnant	2020-09-07	178	3-5 months	2	180	180	0	No	2	NA	3	2020-09-07	0	178
23	IMPORTA-0223	1	2022-09-01	Lubang Jack Simaya	Maridi Hospital	3	2021-01-22	25	Malakia	Married Monogamous	2	Housewife	1	3	3	43903	36	2	Known Pos on ART	2				At Health Facility	1	Live Birth-LB	1	Already on ART	1	2015-08-07	1c = TDF/3TC/DTG	3		2020-01-22	Pregnant	2020-04-20	89	<3 months	1	90	90	0	No	2	NA	3	2020-04-20	0	89
25	IMPORTA-0225	1	2022-09-01	Lubang Jack Simaya	Maridi Hospital	3	2020-02-03	28	Nagbaka	Married Monogamous	2	Housewife	1	2	3	43959	26	2	Newly tested at ANC	1	2 visits	2	2	At Health Facility	1	Live Birth-LB	1	New on ART -- in pregnancy	2	2020-01-03	1c = TDF/3TC/DTG	3		2020-02-03	Pregnant	2020-03-03	29	<3 months	1	30	30	0	Yes	1	Suppressed	1	2020-03-03	0	29
26	IMPORTA-0226	1	2022-09-01	Lubang Jack Simaya	Maridi Hospital	3	2020-02-24	29	Malakia	Married Monogamous	2	Housewife	1	2	3	44077	12	1	Known Pos on ART	2	1 visit	1	1	At Health Facility	1	Live Birth-LB	1	Already on ART	1	2019-11-20	1c = TDF/3TC/DTG	3		2020-05-27	Pregnant	2020-11-26	183	6+ months	3	180	180	0	Yes				2020-11-26	0	183
27	IMPORTA-0227	1	2022-09-01	Lubang Jack Simaya	Maridi Hospital	3	2020-02-04	27	Nadogoli	Married Monogamous	2	Housewife	1	2	3		25	2	Known Pos on ART	2	1 visit	1	1	At Health Facility	1	Live Birth-LB	1	Already on ART	1	2014-10-10	1c = TDF/3TC/DTG	3		2020-02-04	Pregnant	2020-07-29	176	3-5 months	2	180	180	0	Yes	1	Suppressed	1	2020-07-29	0	176
28	IMPORTA-0228	1	2022-09-01	Lubang Jack Simaya	Maridi Hospital	3	2020-02-24	39	Mabilindi	Married Polygamous	2	Housewife	1	3	3	44004	21	2	Known Pos on ART	2	2 visits	2	2	At Health Facility	1	Live Birth-LB	1	Already on ART	1	2014-12-05	1c = TDF/3TC/DTG	3		2020-02-24	Pregnant	2020-05-22	88	<3 months	1	90	90	0	No	2	NA	3	2020-05-22	0	88
29	IMPORTA-0229	1	2022-09-01	Lubang Jack Simaya	Maridi Hospital	3	2020-03-03	35	Gabat	Married Monogamous	2	Other Uniformed forces (Police, Wildlife, Prisons, Fire Brigade)	2	3	3	43986	28	2	Known Pos on ART	2	1 visit	1	1	At Health Facility	1	Live Birth-LB	1			2014-10-03	1c = TDF/3TC/DTG	3			Pregnant	2019-12-30	43829	6+ months	3	180	180	0	Yes	1	Suppressed	1	2020-06-01	154	43983
30	IMPORTA-0230	1	2022-08-01	Lubang Jack Simaya	Maridi Hospital	3	2020-03-11	23	Sukamal	Married Monogamous	2	Housewife	1	2	3	44157	3	1	Known Pos on ART	2	2 visits	2	2	At home	2	Live Birth-LB	1	Already on ART	1	2020-01-27	1c = TDF/3TC/DTG	3		2020-03-11	Pregnant	2020-10-28	231	6+ months	3	197	180	17	No	2	NA	3	2020-10-28	0	231
31	IMPORTA-0231	1	2022-09-01	Lubang Jack Simaya	Maridi Hospital	3	2020-03-10	29	Linezira	Married Monogamous	2	Other Uniformed forces (Police, Wildlife, Prisons, Fire Brigade)	2	3	3	44125	12	1	Known Pos on ART	2	2 visits	2	2	At Health Facility	1	Live Birth-LB	1	Already on ART	1	2015-08-18	1c = TDF/3TC/DTG	3		2020-03-10	Pregnant	2020-09-10	184	6+ months	3	180	180	0	Yes				2020-09-10	0	184
33	IMPORTA-0232	1	2022-09-01	Lubang Jack Simaya	Maridi Hospital	3	2020-03-10	33	Malakia	Married Polygamous	2	Other Uniformed forces (Police, Wildlife, Prisons, Fire Brigade)	2	3	3	43996	24	2	Known Pos on ART	2	2 visits	2	2	At Health Facility	1	Live Birth-LB	1	Already on ART	1	2014-12-12	1c = TDF/3TC/DTG	3		2020-05-08	Pregnant	2020-11-11	187	6+ months	3	182	180	2	Yes	1	Suppressed	1	2020-11-11	0	187
34	IMPORTA-0233	1	2022-09-01	Lubang Jack Simaya	Maridi Hospital	3	2020-03-13	38	Monguo	Married Polygamous	2	Housewife	1	3	3		37	2	Newly tested at ANC	1	1 visit	1	1			Live Birth-LB	1	New on ART -- in pregnancy	2	2021-03-13	1c = TDF/3TC/DTG	3		2020-03-13	Pregnant	2020-09-03	174	3-5 months	2	180	180	0	Yes				2020-09-03	0	174
35	IMPORTA-0234	1	2022-09-01	Lubang Jack Simaya	Maridi Hospital	3	2020-03-23	22	Mabilindi	Married Monogamous	2	Housewife	1	2	3	44352	28	2	Known Pos on ART	2	2 visits	2	2	At home	2			Already on ART	1	2019-11-28	1c = TDF/3TC/DTG	3		2020-03-23	Pregnant	2020-09-24	185	6+ months	3	180	180	0	Yes				2020-09-24	0	185
36	IMPORTA-0235	1	2022-09-01	Lubang Jack Simaya	Maridi Hospital	3	2020-03-31	35	Armia	Married Monogamous	2	Housewife	1	3	3		37	2	Known Pos on ART	2	1 visit	1	1	At home	2	Live Birth-LB	1	Already on ART	1	2020-01-14	1c = TDF/3TC/DTG	3		2020-02-26	Pregnant	2020-08-28	184	6+ months	3	180	180	0	No	2	NA	3	2020-08-28	0	184
37	IMPORTA-0236	1	2022-09-01	Lubang Jack Simaya	Maridi Hospital	3	2020-04-01	28	GMT	Married Monogamous	2	Housewife	1	3	3	44048			Newly tested at ANC	1	1 visit	1	1	At Health Facility	1	Live Birth-LB	1	New on ART -- in pregnancy	2	2020-04-01	1c = TDF/3TC/DTG	3		2020-03-31	Pregnant	2020-09-30	183	6+ months	3	180	180	0	Yes	1	Unsuppressed	2	2020-09-30	0	183
38	IMPORTA-0237	1	2022-09-01	Lubang Jack Simaya	Maridi Hospital	3	2020-04-14	30	Comboni	Married Monogamous	2	Farming	2	3	3		20	2	Known Pos on ART	2	1 visit	1	1	At home	2	Live Birth-LB	1	Already on ART	1	2017-11-28	1c = TDF/3TC/DTG	3		2020-04-14	Pregnant	2020-11-04	204	6+ months	3	200	180	20	Yes				2020-04-11	-207
39	IMPORTA-0238	1	2022-09-01	Lubang Jack Simaya	Maridi Hospital	3	2020-04-14	30	Mongua	Married Monogamous	2	Housewife	1	3	3		25	2			1 visit	1	1	At home	2	Live Birth-LB	1	Already on ART	1	2017-07-27	1c = TDF/3TC/DTG	3		2020-04-14	Pregnant	2020-08-17	125	3-5 months	2	180	180	0	No	2	NA	3	2020-08-17	0	125
40	IMPORTA-0239	1	2022-09-01	Lubang Jack Simaya	Maridi Hospital	3	2020-04-15	30	Araka	Married Monogamous	2	Farming	2	3	3	44094			Known Pos on ART	2	2 visits	2	2	At Health Facility	1	Live Birth-LB	1	Already on ART	1	2014-05-30	1c = TDF/3TC/DTG	3		2020-03-04	Pregnant	2020-09-02	182	6+ months	3	180	180	0	Yes	1	Suppressed	1	2020-09-02	0	182
41	IMPORTA-0240	1	2022-09-01	Lubang Jack Simaya	Maridi Hospital	3	2020-04-28	42	Don Bosco	Married Monogamous	2	Farming	2	3	3	44114	16	2	Known Pos on ART	2	2 visits	2	2	At Health Facility	1	Live Birth-LB	1	Already on ART	1	2012-12-02	1c = TDF/3TC/DTG	3		2020-03-04	Pregnant	2020-09-08	188	6+ months	3	184	180	4	Yes				2020-09-08	0	188
42	IMPORTA-0241	1	2022-09-01	Lubang Jack Simaya	Maridi Hospital	3	2020-04-29	25	Hai Mess	Married Monogamous	2	Housewife	1	3	3	44113	16	2	Known Pos on ART	2	2 visits	2	2	At Health Facility	1	Live Birth-LB	1	Already on ART	1	2015-10-26	1c = TDF/3TC/DTG	3		2020-02-25	Pregnant	2020-08-24	181	6+ months	3	180	180	0	Yes				2020-08-24	0	181
43	IMPORTA-0242	1	2022-09-01	Lubang Jack Simaya	Maridi Hospital	3	2020-04-03	23	Hai Tarawa	Married Monogamous	2	Housewife	1	2	3		22	2	Known Pos on ART	2	1 visit	1	1	At home	2	Live Birth-LB	1	Already on ART	1		1c = TDF/3TC/DTG	3		2020-04-03	Pregnant	2020-10-12	192	6+ months	3	189	180	9	Yes	1	Suppressed	1	2020-10-12	0	192
44	IMPORTA-0243	1	2022-09-01	Lubang Jack Simaya	Maridi Hospital	3	2020-05-07	24	Nadogoli	Married Monogamous	2	Farming	2	2	3	44056	22	2	Known Pos on ART	2	2 visits	2	2	At home	2	Live Birth-LB	1	Already on ART	1	2017-07-03	1c = TDF/3TC/DTG	3		2020-02-05	Pregnant	2020-08-03	180	6+ months	3	180	180	0	Yes				2020-08-03	0	180
45	IMPORTA-0244	1	2022-09-01	Lubang Jack Simaya	Maridi Hospital	3	2020-05-13	35	Bethsaida	Married Monogamous	2	Farming	2	3	3	44856	17	2	Known Pos on ART	2	1 visit	1	1	At Health Facility	1			New on ART -- in pregnancy	2	2020-05-13	1c = TDF/3TC/DTG	3		2020-05-13	Pregnant	2020-10-16	156	3-5 months	2	180	180	0	Yes	1	Suppressed	1	2020-10-16	0	156
46	IMPORTA-0245	1	2022-09-01	Lubang Jack Simaya	Maridi Hospital	3	2020-05-14	26	Lalama	Married Monogamous	2	Student	1	1	2	44060	26	2	Newly tested at ANC	1	1 visit	1	1	At home	2	Live Birth-LB	1	New on ART -- in pregnancy	2	2020-05-14	1c = TDF/3TC/DTG	3		2020-05-14	Pregnant	2020-11-20	190	6+ months	3	186	180	6	Yes	1	Suppressed	1	2020-11-20	0	190
47	IMPORTA-0246	1	2022-09-01	Lubang Jack Simaya	Maridi Hospital	3	2020-05-08	28	Malakia	Married Monogamous	2	Student	1	1	2	43989	36	2	Known Pos on ART	2	1 visit	1	1	At Health Facility	1	Live Birth-LB	1	Already on ART	1	2018-11-28	1c = TDF/3TC/DTG	3		2020-05-08	Pregnant	2020-11-05	181	6+ months	3	180	180	0	No	2	NA	3	2020-11-05	0	181
48	IMPORTA-0247	1	2022-09-01	Lubang Jack Simaya	Maridi Hospital	3	2020-05-18	26	Mongua	Married Monogamous	2	Housewife	1	3	3	44118	24	2	Known Pos on ART	2	1 visit	1	1	At Health Facility	1	Live Birth-LB	1	Already on ART	1	2018-07-10	1c = TDF/3TC/DTG	3		2021-05-18	Pregnant	2020-12-17				180	180	0	Yes				2020-12-17	0
49	IMPORTA-0248	1	2022-09-01	Lubang Jack Simaya	Maridi Hospital	3	2020-05-15	18	Amira	Married Monogamous	2	Housewife	1	1	2		12	1	Newly tested at ANC	1	2 visits	2	2	At home	2	Live Birth-LB	1	New on ART -- in pregnancy	2	2020-05-15	1c = TDF/3TC/DTG	3		2020-05-15	Pregnant	2020-10-10	148	3-5 months	2	156	90	66	No	2	NA	3	2020-10-22	12	160
50	IMPORTA-0249	1	2022-09-01	Lubang Jack Simaya	Maridi Hospital	3	2020-06-05	36	Suk Amal	Married Monogamous	2	Business (Man/Women)/trader	2	3	3	44140	24	2	Known Pos on ART	2	1 visit	1	1	At Health Facility	1	Live Birth-LB	1	Already on ART	1	2013-05-13	1c = TDF/3TC/DTG	3		2020-06-13	Pregnant	2020-12-14	184	6+ months	3	180	180	0	Yes	1	Suppressed	1	2020-12-14	0	184
51	IMPORTA-0250	1	2022-09-01	Lubang Jack Simaya	Maridi Hospital	3	2021-06-15	26	Hai Gabat	Married Polygamous	2	Housewife	1	2	3	44182	18	2	Known Pos on ART	2	2 visits	2	2	At Health Facility	1	Live Birth-LB	1	Already on ART	1	2019-09-03	1c = TDF/3TC/DTG	3		2020-08-21	Pregnant	2021-02-10	173	3-5 months	2	180	180	0	Yes				2021-02-10	0	173
52	IMPORTA-0251	1	2022-09-02	Lubang Jack Simaya	Maridi Hospital	3	2022-07-07	36	Hai Gabat	Married Monogamous	2	Other Uniformed forces (Police, Wildlife, Prisons, Fire Brigade)	2	1	2	44209	13	1	Known Pos on ART	2	2 visits	2	2	At home	2	Live Birth-LB	1	Already on ART	1	2017-05-31	1c = TDF/3TC/DTG	3		2020-06-18	Pregnant	2020-12-17	182	6+ months	3	180	180	0	Yes				2020-12-17	0	182
53	IMPORTA-0252	1	2022-09-02	Lubang Jack Simaya	Maridi Hospital	3	2020-07-10	24	Hai Gabat	Married Monogamous	2	Housewife	1	3	3	44159	16	2	Known Pos on ART	2	2 visits	2	2	At Health Facility	1	Live Birth-LB	1	Already on ART	1	2012-07-17	1c = TDF/3TC/DTG	3		2020-02-17	Pregnant	2020-11-24	281	6+ months	3	264	180	84	Yes				2020-11-24	0	281
54	IMPORTA-0253	1	2022-04-02	Lubang Jack Simaya	Maridi Hospital	3	2020-07-13	36	Nambia	Married Monogamous	2	Housewife	1	3	3	44790	17	2	Known Pos on ART	2	1 visit	1	1	At Health Facility	1	Live Birth-LB	1	Already on ART	1	2015-10-09	1c = TDF/3TC/DTG	3		2020-09-03	Pregnant	2021-10-19	411	6+ months	3	375	180	195	Yes				2021-09-19	-30	381
55	IMPORTA-0254	1	2022-09-02	Lubang Jack Simaya	Maridi Hospital	3	2020-07-14	39	Nagbaka	Married Monogamous	2	Housewife	1	3	3		15	1	Known Pos on ART	2	1 visit	1	1	At home	2	Live Birth-LB	1	Already on ART	1	2017-05-17	1c = TDF/3TC/DTG	3		2020-08-13	Pregnant	2021-02-16	187	6+ months	3	182	180	2	No	2	NA	3	2021-02-16	0	187
56	IMPORTA-0255	1	2022-09-02	Lubang Jack Simaya	Maridi Hospital	3	2020-07-15	18	GMT	Married Monogamous	2	Student	1	1	2	44152	22	2	Known Pos on ART	2	1 visit	1	1	At home	2	Live Birth-LB	1	Already on ART	1	2020-01-20	1c = TDF/3TC/DTG	3		2020-08-25	Pregnant	2020-12-07	104	3-5 months	2	180	180	0	Yes				2020-12-07	0	104
57	IMPORTA-0256	1	2022-09-02	Lubang Jack Simaya	Maridi Hospital	3	2020-07-21	40	Armia	Married Polygamous	2	Other Uniformed forces (Police, Wildlife, Prisons, Fire Brigade)	2	3	3	44159			Known Pos on ART	2	1 visit	1	1	At Health Facility	1	Live Birth-LB	1	Already on ART	1	2017-10-06	1c = TDF/3TC/DTG	3		2020-07-21	Pregnant	2021-01-26	189	6+ months	3	184	180	4	Yes	1	Unsuppressed	2	2021-01-26	0	189
58	IMPORTA-0257	1	2022-09-02	Lubang Jack Simaya	Maridi Hospital	3	2020-07-07	24	Barak Sika	Married Monogamous	2	Housewife	1	1	2	44159	24	2	Known Pos on ART	2	1 visit	1	1	At home	2	Live Birth-LB	1	New on ART -- in pregnancy	2	2017-10-06	1c = TDF/3TC/DTG	3		2020-07-07	Pregnant	2021-05-06	303	6+ months	3	298	180	118	Yes	1	Unsuppressed	2	2020-05-06	-365
59	IMPORTA-0258	1	2022-09-02	Lubang Jack Simaya	Maridi Hospital	3	2020-08-11	15	Rastigi	Married Monogamous	2	Housewife	1	1	1	44238			Known Pos on ART	2	1 visit	1	1	At home	2	Live Birth-LB	1	Already on ART	1	2019-02-15	1c = TDF/3TC/DTG	3		2020-08-27	Pregnant	2021-01-11	137	3-5 months	2	180	180	0	Yes	1	Unsuppressed	2	2021-01-11	0	137
60	IMPORTA-0259	1	2022-09-02	Lubang Jack Simaya	Maridi Hospital	3	2020-08-11		Mongua	Married Polygamous	2	Housewife	1	3	3		14	1	Known Pos on ART	2	1 visit	1	1	At Health Facility	1	Live Birth-LB	1	Already on ART	1	2017-04-30	1c = TDF/3TC/DTG	3		2020-08-11	Pregnant	2021-11-17	463	6+ months	3	457	180	277	No	2	NA	3	2021-11-17	0	463
61	IMPORTA-0260	1	2022-09-02	Lubang Jack Simaya	Maridi Hospital	3	2020-08-07	35	Hai Gabat	Married Monogamous	2	Housewife	1	3	3	44113	31	2	Newly tested at ANC	1	1 visit	1	1	At Health Facility	1	Live Birth-LB	1	New on ART -- in pregnancy	2	2020-08-07	1c = TDF/3TC/DTG	3		2020-08-07	Pregnant	2021-02-08	185	6+ months	3	180	180	0	Yes	1	Suppressed	1	2021-02-08	0	185
52	IMPORTA-0261	1	2022-09-02	Lubang Jack Simaya	Maridi Hospital	3	2020-08-13	30	Hai Gabat	Married Monogamous	2	Housewife	1	3	3	44126	30	2	Known Pos on ART	2	1 visit	1	1	At Health Facility	1	Live Birth-LB	1	Already on ART	1	2017-05-31	1c = TDF/3TC/DTG	3		2020-08-18	Pregnant	2021-02-25	191	6+ months	3	180	180	0	Yes	1	Suppressed	1	2021-02-25	0	191
63	IMPORTA-0262	1	2022-09-02	Lubang Jack Simaya	Maridi Hospital	3	2021-08-02	27	Mabilindi	Married Monogamous	2	Housewife	1	2	3	44173	22	2	Known Pos on ART	2	1 visit	1	1	At home	2	Neonatal Death-ND	3	New on ART -- in pregnancy	2	2020-08-18	1c = TDF/3TC/DTG	3		2021-08-03	Pregnant	2022-01-31	181	6+ months	3	180	180	0	Yes	1	Suppressed	1	2022-01-31	0	181
64	IMPORTA-0263	1	2022-09-02	Lubang Jack Simaya	Maridi Hospital	3	2020-08-18	22	Malakia	Married Monogamous	2	Housewife	1	1	2	44223	24	2	Known Pos on ART	2	1 visit	1	1	At Health Facility	1	Live Birth-LB	1	Already on ART	1	2018-03-29	1c = TDF/3TC/DTG	3		2020-08-18	Pregnant	2021-01-18	153	3-5 months	2	180	180	0	No	2	NA	3	2021-01-18	0	153
65	IMPORTA-0264	1	2022-09-02	Lubang Jack Simaya	Maridi Hospital	3	2020-08-25	28	Nadogoli	Married Monogamous	2	Housewife	1	2	3	44196	22	2	Newly tested at ANC	1	1 visit	1	1	At Health Facility	1	Live Birth-LB	1	New on ART -- in pregnancy	2	2020-08-25	1c = TDF/3TC/DTG	3		2020-08-25	Pregnant	2021-02-22	181	6+ months	3	180	180	0	No	2	NA	3	2021-02-22	0	181
66	IMPORTA-0265	1	2022-09-02	Lubang Jack Simaya	Maridi Hospital	3	2020-08-13	33	GMT	Married Monogamous	2	Housewife	1	2	3	44236			Known Pos on ART	2	2 visits	2	2	At Health Facility	1	Live Birth-LB	1	Already on ART	1	2014-10-07	1c = TDF/3TC/DTG	3		2020-08-31	Pregnant	2021-02-03	156	3-5 months	2	180	180	0	Yes	1	Suppressed	1	2021-02-03	0	156
67	IMPORTA-0266	1	2022-09-02	Lubang Jack Simaya	Maridi Hospital	3	2020-09-08	30	Matara	Married Monogamous	2	Housewife	1	2	3	44226	17	2	Known Pos on ART	2	3 visits	3	3	At Health Facility	1	Live Birth-LB	1	Already on ART	1	2014-10-09	1c = TDF/3TC/DTG	3		2020-09-08	Pregnant	2021-03-05	178	3-5 months	2	212	180	32	No	2	NA	3	2021-03-05	0	178
68	IMPORTA-0267	1	2022-09-02	Lubang Jack Simaya	Maridi Hospital	3	2020-09-14	35	Mongua	Married Polygamous	2	Farming	2	3	3	44274			Known Pos on ART	2	1 visit	1	1	At Health Facility	1	Live Birth-LB	1	Already on ART	1	2016-11-21	1c = TDF/3TC/DTG	3		2020-11-18	Pregnant	2021-05-17	180	6+ months	3	180	180	0	No	2	NA	3	2021-05-17	0	180
69	IMPORTA-0268	1	2022-09-02	Lubang Jack Simaya	Maridi Hospital	3	2020-09-04	26	Don Bosco	Married Monogamous	2	Housewife	1	3	3	44325	6	1	Known Pos on ART	2	1 visit	1	1	At Health Facility	1			Already on ART	1	2018-08-13	1c = TDF/3TC/DTG	3		2020-12-03	Pregnant	2021-06-21	200	6+ months	3	198	180	18	Yes	1	Suppressed	1	2021-06-21	0	200
70	IMPORTA-0269	1	2022-09-02	Lubang Jack Simaya	Maridi Hospital	3	2020-09-21	30	Lirie Zira	Married Monogamous	2	Housewife	1	3	3	44162	32	2	Known Pos on ART	2	1 visit	1	1	At Health Facility	1	Live Birth-LB	1	Already on ART	1	2011-11-26	1c = TDF/3TC/DTG	3		2020-09-02	Pregnant	2020-11-11	70	<3 months	1	50	30	20	Yes	1	Suppressed	1	2020-11-11	0	70
71	IMPORTA-0270	1	2022-09-02	Lubang Jack Simaya	Maridi Hospital	3	2020-10-09	30	Mongua	Married Monogamous	2	Housewife	1	3	3	44243	24	2	Known Pos on ART	2	1 visit	1	1	At Health Facility	1	Live Birth-LB	1	Already on ART	1	2013-03-23	1c = TDF/3TC/DTG	3		2020-10-01	Pregnant	2021-04-08	189	6+ months	3	186	180	6	No	2	NA	3	2021-04-08	0	189
72	IMPORTA-0271	1	2022-09-03	Lubang Jack Simaya	Maridi Hospital	3	2020-11-09	23	Armia	Married Monogamous	2	Farming	2	1	2	44219	29	2	Known Pos on ART	2	3 visits	3	3	At Health Facility	1	Live Birth-LB	1	Already on ART	1	2019-04-15	1c = TDF/3TC/DTG	3		2020-11-09	Pregnant	2021-05-17	189	6+ months	3	186	180	6	Yes	1	Suppressed	1	2021-05-17	0	189
73	IMPORTA-0272	1	2022-09-03	Lubang Jack Simaya	Maridi Hospital	3	2020-11-12	23	Hai Liben	Married Polygamous	2	Housewife	1	1	2	44327	12	1	Newly tested at ANC	1	1 visit	1	1	At Health Facility	1	Live Birth-LB	1	New on ART -- in pregnancy	2	2020-11-12	1c = TDF/3TC/DTG	3		2020-11-12	Pregnant	2021-06-11	211	6+ months	3	180	180	0	Yes	1	Unsuppressed	2	2021-06-11	0	211
74	IMPORTA-0273	1	2022-09-03	Lubang Jack Simaya	Maridi Hospital	3	2020-12-01	20	Mudubai	Married Monogamous	2	Housewife	1	2	3	44364	10	1	Known Pos on ART	2	1 visit	1	1	At home	2	Live Birth-LB	1	Already on ART	1	2011-02-18	1c = TDF/3TC/DTG	3		2020-12-01	Pregnant	2021-05-10	160	3-5 months	2	180	180	0	Yes	1	Suppressed	1	2021-05-10	0	160
75	IMPORTA-0274	1	2022-09-03	Lubang Jack Simaya	Maridi Hospital	3	2020-12-15	28	Malakia	Married Polygamous	2	Housewife	1	3	3	44360	13	1	Known Pos on ART	2	1 visit	1	1	At Health Facility	1	Live Birth-LB	1	Already on ART	1	2018-03-12	1c = TDF/3TC/DTG	3		2020-12-15	Pregnant	2021-06-16	183	6+ months	3	180	180	0	Yes	1	Suppressed	1	2021-06-16	0	183
76	IMPORTA-0275	1	2022-09-03	Lubang Jack Simaya	Maridi Hospital	3	2020-12-30	35	Dengirisufu	Widowed	3	Business (Man/Women)/trader	2	3	3	44293	20	2	Known Pos on ART	2	2 visits	2	2	At Health Facility	1	Live Birth-LB	1	Already on ART	1	2011-09-19	1c = TDF/3TC/DTG	3		2020-12-30	Pregnant	2021-06-08	160	3-5 months	2	180	180	0	Yes	1	Suppressed	1	2021-06-08	0	160
77	IMPORTA-0276	1	2022-09-03	Lubang Jack Simaya	Maridi Hospital	3	2021-01-18	17	Lalama	Married Polygamous	2	Housewife	1	1	1	44308	28	2	Newly tested at ANC	1	2 visits	2	2	At home	2	Live Birth-LB	1	Already on ART	1	2021-01-18	1c = TDF/3TC/DTG	3		2021-01-18	Pregnant	2021-07-14	177	3-5 months	2	180	180	0	No	2	NA	3	2021-07-14	0	177
78	IMPORTA-0277	1	2022-09-03	Lubang Jack Simaya	Maridi Hospital	3	2021-02-05	20	Malakia	Married Monogamous	2	Housewife	1	2	3		25	2	Newly tested at ANC	1	1 visit	1	1	At Health Facility	1	Live Birth-LB	1	New on ART -- in pregnancy	2	2021-02-05	1c = TDF/3TC/DTG	3		2021-02-15	Pregnant	2021-08-10	176	3-5 months	2	180	180	0	Yes	1	Suppressed	1	2021-08-10	0	176
89	IMPORTA-0278	1	2022-09-03	Lubang Jack Simaya	Maridi Hospital	3	2021-02-18	23	Malakia	Widowed	3	Housewife	1	3	3	44258	38	2	Known Pos on ART	2	1 visit	1	1	At Health Facility	1	Live Birth-LB	1	Already on ART	1	2017-11-07	1c = TDF/3TC/DTG	3		2021-02-18	Pregnant	2021-08-17	180	6+ months	3	180	180	0	Yes	1	Suppressed	1	2021-08-17	0	180
80	IMPORTA-0279	1	2022-08-19	Lubang Jack Simaya	Maridi Hospital	3	2021-02-08	21	Hai Magaya	Married Polygamous	2	Housewife	1	3	3		25	2	Known Pos on ART	2	1 visit	1	1	At Health Facility	1	Live Birth-LB	1	Already on ART	1	2015-10-06	1c = TDF/3TC/DTG	3		2021-02-08	Pregnant	2021-08-06	179	3-5 months	2	180	180	0	No	2	NA	3	2021-08-06	0	179
82	IMPORTA-0281	1	2022-09-03	Lubang Jack Simaya	Maridi Hospital	3	2021-03-09	21	Hai Gizira	Married Monogamous	2	Housewife	1	2	3	44328			Newly tested at ANC	1	1 visit	1	1	At Health Facility	1	Live Birth-LB	1	New on ART -- in pregnancy	2	2021-03-09	1c = TDF/3TC/DTG	3		2021-03-09	Pregnant	2021-09-03	178	3-5 months	2	180	180	0	No	2	NA	3	2021-09-03	0	178
83	IMPORTA-0282	1	2022-09-03	Lubang Jack Simaya	Maridi Hospital	3	2021-03-16	28	Malakia	Single (never married)	1	Unemployed	1	3	3	44447			Known Pos on ART	2	1 visit	1	1	At Health Facility	1	Live Birth-LB	1	Already on ART	1	2017-05-15	1c = TDF/3TC/DTG	3		2021-03-16	Pregnant	2021-08-04	141	3-5 months	2	180	180	0	Yes	1	Suppressed	1	2021-08-04	0	141
84	IMPORTA-0283	1	2022-09-03	Lubang Jack Simaya	Maridi Hospital	3	2021-03-19	14	Mongua	Married Monogamous	2	Housewife	1	1	1	44461	14	1	Newly tested at ANC	1	1 visit	1	1	At Health Facility	1	Live Birth-LB	1	New on ART -- in pregnancy	2	2021-03-19	1c = TDF/3TC/DTG	3		2021-03-19	Pregnant	2021-09-17	182	6+ months	3	180	180	0	Yes	1	Suppressed	1	2021-09-17	0	182
85	IMPORTA-0285	1	2022-09-03	Lubang Jack Simaya	Maridi Hospital	3	2021-04-16	39	Matara	Married Polygamous	2	Housewife	1	3	3	44378	24	2	Newly tested at ANC	1	1 visit	1	1	At Health Facility	1	Live Birth-LB	1	New on ART -- in pregnancy	2	2021-04-16	1c = TDF/3TC/DTG	3		2021-04-16	Pregnant	2021-10-22	189	6+ months	3	186	180	6	No	2	NA	3	2021-10-22	0	189
86	IMPORTA-0286	1	2022-09-03	Lubang Jack Simaya	Maridi Hospital	3	2021-04-22	42	Lougbua	Married Monogamous	2	Housewife	1	3	3	44413	25	2	Newly tested at ANC	1	1 visit	1	1	At Health Facility	1	Live Birth-LB	1	New on ART -- in pregnancy	2	2021-04-22	1c = TDF/3TC/DTG	3		2021-04-22	Pregnant	2021-10-20	181	6+ months	3	180	180	0	No	2	NA	3	2021-10-20	0	181
87	IMPORTA-0287	1	2022-09-03	Lubang Jack Simaya	Maridi Hospital	3	2021-04-22	35	Manbe	Married Monogamous	2	Housewife	1	3	3	44328	37	2	Newly tested at ANC	1	1 visit	1	1	At Health Facility	1	Live Birth-LB	1	New on ART -- in pregnancy	2	2021-04-22	1c = TDF/3TC/DTG	3		2021-04-22	Pregnant	2021-10-20	181	6+ months	3	180	180	0	Yes	1	Suppressed	1	2021-10-20	0	181
88	IMPORTA-0288	1	2022-09-03	Lubang Jack Simaya	Maridi Hospital	3	2021-04-29	30	Mongua	Married Monogamous	2	Housewife	1	3	3	44317	38	2	Newly tested at ANC	1	1 visit	1	1	At Health Facility	1	Live Birth-LB	1	New on ART -- in pregnancy	2	2021-04-29	1c = TDF/3TC/DTG	3		2021-04-29	Pregnant	2021-11-10	195	6+ months	3	199	180	19	No	2	NA	3	2021-11-10	0	195
89	IMPORTA-0289	1	2022-09-03	Lubang Jack Simaya	Maridi Hospital	3	2021-04-30	27	Civicon	Married Monogamous	2	Farming	2	2	3		24	2	Known Pos on ART	2	2 visits	2	2	At home	2	Live Birth-LB	1	Already on ART	1	2018-07-17	1c = TDF/3TC/DTG	3		2021-04-30	Pregnant	2021-10-28	181	6+ months	3	180	180	0	Yes	1	Suppressed	1	2021-10-28	0	181
90	IMPORTA-0290	1	2022-09-03	Lubang Jack Simaya	Maridi Hospital	3	2021-05-11	36	Mongua	Married Monogamous	2	Farming	2	3	3	44522	13	1	Known Pos on ART	2	1 visit	1	1	At Health Facility	1	Live Birth-LB	1	Already on ART	1	2014-10-23	1c = TDF/3TC/DTG	3		2021-07-12	Pregnant	2022-01-10	182	6+ months	3	180	180	0	No	2	NA	3	2022-01-10	0	182
91	IMPORTA-0291	1	2022-09-03	Lubang Jack Simaya	Maridi Hospital	3	2021-05-24	45	Lalama	Married Polygamous	2	Farming	2	3	3		13	1	Newly tested at ANC	1	1 visit	1	1	At home	2	Live Birth-LB	1	New on ART -- in pregnancy	2	2021-05-24	1c = TDF/3TC/DTG	3		2021-05-24	Pregnant	2021-08-02	70	<3 months	1	90	90	0	No	2	NA	3	2021-08-02	0	70
93	IMPORTA-0292	1	2022-09-03	Lubang Jack Simaya	Maridi Hospital	3	2021-06-01	28	Malakia	Married Monogamous	2	Unemployed	1	3	3	44468	21	2	Known Pos on ART	2	1 visit	1	1	At Health Facility	1	Live Birth-LB	1	Already on ART	1	2019-04-18	1c = TDF/3TC/DTG	3		2021-07-30	Pregnant	2022-01-21	175	3-5 months	2	180	180	0	No	2	NA	3	2022-01-21	0	175
93	IMPORTA-0293	1	2022-09-03	Lubang Jack Simaya	Maridi Hospital	3	2021-06-11	22	Odabi	Married Polygamous	2	Business (Man/Women)/trader	2	2	3	44439	28	2	Known Pos on ART	2	1 visit	1	1	At Health Facility	1	Live Birth-LB	1	Already on ART	1	2018-05-30	1c = TDF/3TC/DTG	3		2021-06-11	Pregnant	2021-09-06	87	<3 months	1	90	90	0	Yes	1	Suppressed	1	2021-09-06	0	87
94	IMPORTA-0294	1	2022-09-03	Lubang Jack Simaya	Maridi Hospital	3	2021-06-21	20	Forokosika	Married Monogamous	2	Business (Man/Women)/trader	2	1	2		22	2	Breastfeeding	1	2 visits	2	2	At home	2	Live Birth-LB	1	New on ART -- postpartum	2		1c = TDF/3TC/DTG	3		2021-06-21	Pregnant	2021-12-14	176	3-5 months	2	180	180	0	No	2	NA	3	2021-12-21	7	183
95	IMPORTA-0295	1	2022-09-03	Lubang Jack Simaya	Maridi Hospital	3	2022-08-02	28	Landizina	Married Monogamous	2	Housewife	1	3	3		28	2	Newly tested at ANC	1	1 visit	1	1	At home	2	Live Birth-LB	1	New on ART -- in pregnancy	2	2021-06-30	1c = TDF/3TC/DTG	3		2021-06-30	Pregnant	2021-08-23	54	<3 months	1	60	60	0	No	2	NA	3	2021-11-23	92	146
96	IMPORTA-0296	1	2022-09-03	Lubang Jack Simaya	Maridi Hospital	3	2021-07-02	30	Hai Gezira	Married Polygamous	2	Business (Man/Women)/trader	2	3	3	44522	21	2	Known Pos on ART	2	1 visit	1	1	At Health Facility	1	Live Birth-LB	1	Already on ART	1	2015-11-20	1c = TDF/3TC/DTG	3		2021-08-03	Pregnant	2022-01-19	169	3-5 months	2	180	180	0	No	2	NA	3	2022-01-19	0	169
97	IMPORTA-0297	1	2022-09-03	Lubang Jack Simaya	Maridi Hospital	3	2021-07-13	28	Hai police	Married Polygamous	2	Business (Man/Women)/trader	2	2	3	44524			Known Pos on ART	2	1 visit	1	1	At Health Facility	1	Live Birth-LB	1	Already on ART	1	2018-09-04	1c = TDF/3TC/DTG	3		2021-07-13	Pregnant	2021-10-29	108	3-5 months	2	180	180	0	Yes	1	Suppressed	1	2021-10-29	0	108
98	IMPORTA-0298	1	2022-09-03	Lubang Jack Simaya	Maridi Hospital	3	2021-07-27	36	sikaRumbek	Married Monogamous	2	Housewife	1	3	3	44105	28	2	Known Pos on ART	2	1 visit	1	1	At Health Facility	1	Live Birth-LB	1	Already on ART	1	2020-05-08	1c = TDF/3TC/DTG	3		2021-04-21	Pregnant	2021-09-29	161	3-5 months	2	180	180	0	Yes	1	Suppressed	1	2021-09-29	0	161
99	IMPORTA-0299	1	2022-09-03	Lubang Jack Simaya	Maridi Hospital	3	2021-07-28	32	Malakia	Married Monogamous	2	Military Personnel	2	3	3	44496	32	2	Known Pos on ART	2	1 visit	1	1	At Health Facility	1	Live Birth-LB	1	Already on ART	1	2015-01-01	1c = TDF/3TC/DTG	3		2021-07-15	Pregnant	2022-01-11	180	6+ months	3	180	180	0	Yes	1	Suppressed	1	2022-01-11	0	180
100	IMPORTA-0300	1	2022-09-03	Lubang Jack Simaya	Maridi Hospital	3	2021-09-01	29	mombsasa	Married Monogamous	2	Other Uniformed forces (Police, Wildlife, Prisons, Fire Brigade)	2	3	3	44608	13	1	Known Pos on ART	2	1 visit	1	1	At Health Facility	1	Live Birth-LB	1	Already on ART	1	2015-08-21	1c = TDF/3TC/DTG	3		2021-08-11	Pregnant	2022-02-10	183	6+ months	3	180	180	0	No	2	NA	3	2022-02-16	6	189
101	IMPORTA-0301	1	2022-09-03	Lubang Jack Simaya	Maridi Hospital	3	2021-09-08	28	Mangua	Married Monogamous	2	Farming	2	3	3		22	2	Known Pos on ART	2	1 visit	1	1	At home	2	Live Birth-LB	1	Already on ART	1	2020-04-21	1c = TDF/3TC/DTG	3		2021-09-08	Pregnant	2022-03-03	176	3-5 months	2	180	180	0	Yes	1	Unsuppressed	2	2022-03-03	0	176
103	IMPORTA-0303	1	2022-09-04	Lubang Jack Simaya	Maridi Hospital	3	2022-09-27	28	Totin	Married Monogamous	2	Business (Man/Women)/trader	2	3	3	44571	24	2	Known Pos on ART	2	1 visit	1	1	At Health Facility	1	Live Birth-LB	1	Already on ART	1	2019-01-03	1c = TDF/3TC/DTG	3		2021-09-27	Pregnant	2022-03-03	157	3-5 months	2	180	180	0	Yes	1	Suppressed	1		44623
104	IMPORTA-0304	1	2022-09-04	Lubang Jack Simaya	Maridi Hospital	3	2021-10-20	36	Landikulu	Single (never married)	1	Farming	2	3	3	44522	36	2	Known Pos on ART	2	1 visit	1	1	At home	2	Live Birth-LB	1	Already on ART	1	2015-08-23	1c = TDF/3TC/DTG	3		2021-08-20	Pregnant	2022-05-17	270	6+ months	3	210	180	30	Yes	1	Suppressed	1		44698
105	IMPORTA-0305	1	2022-09-04	Lubang Jack Simaya	Maridi Hospital	3	2021-10-07	29	Nagbaka	Married Monogamous	2	Housewife	1	3	3		22	2	Breastfeeding	1	2 visits	2	2	At home	2	Live Birth-LB	1	Already on ART	1	2021-07-16	1c = TDF/3TC/DTG	3		2021-07-16	Breastfeeding	2022-01-14	182	6+ months	3	180	180	0	Yes	1	Suppressed	1	2022-01-14	0	182
106	IMPORTA-0306	1	2022-09-04	Lubang Jack Simaya	Maridi Hospital	3	2021-10-06	21	Muku	Married Polygamous	2	Unemployed	1	2	3	44485	38	2	Breastfeeding	1	2 visits	2	2	At home	2	Live Birth-LB	1	Already on ART	1	2018-09-10	1c = TDF/3TC/DTG	3		2021-07-06	Pregnant	2022-01-03	181	6+ months	3	180	180	0	Yes	1	Suppressed	1	2022-01-03	0	181
107	IMPORTA-0307	1	2022-09-04	Lubang Jack Simaya	Maridi Hospital	3	2021-10-26	24	Mongua	Married Monogamous	2	Housewife	1	3	3	44644	20	2	Known Pos on ART	2	1 visit	1	1	At Health Facility	1	Live Birth-LB	1	Already on ART	1	2018-08-28	1c = TDF/3TC/DTG	3		2021-10-26	Pregnant	2022-04-12	168	3-5 months	2	180	180	0	Yes	1	Suppressed	1		44663
108	IMPORTA-0308	1	2022-09-04	Lubang Jack Simaya	Maridi Hospital	3	2021-11-17	23	Kwanga	Married Monogamous	2	Housewife	1	3	3				Known Pos on ART	2	1 visit	1	1	At Health Facility	1	Live Birth-LB	1	Already on ART	1	2018-06-11	1c = TDF/3TC/DTG	3		2021-11-17	Pregnant	2022-04-18	152	3-5 months	2	180	180	0	Yes	1	Suppressed	1		44669
109	IMPORTA-0309	1	2022-09-04	Lubang Jack Simaya	Maridi Hospital	3	2022-01-13	34	Marid ii	Married Monogamous	2	Housewife	1	3	3	44717			Known Pos on ART	2	1 visit	1	1	At Health Facility	1	Live Birth-LB	1	Already on ART	1	2021-06-08	1c = TDF/3TC/DTG	3		2022-01-12	Pregnant	2022-07-15	184	6+ months	3	180	180	0	Yes	1	Suppressed	1		44757
110	IMPORTA-0310	1	2022-09-04	Lubang Jack Simaya	Maridi Hospital	3	2022-01-24	27	Hai Gezira	Married Monogamous	2	Housewife	1	3	3	44813			Known Pos on ART	2	1 visit	1	1	At Health Facility	1	Live Birth-LB	1	Already on ART	1	2018-07-06	1c = TDF/3TC/DTG	3		2022-01-24	Pregnant	2022-07-20	177	3-5 months	2	180	180	0	Yes	1	Suppressed	1		44762
111	IMPORTA-0311	1	2022-09-04	Lubang Jack Simaya	Maridi Hospital	3	2022-01-27	36	Rastigi	Married Polygamous	2	Housewife	1	3	3	44744			Known Pos on ART	2	1 visit	1	1	At Health Facility	1	Live Birth-LB	1	Already on ART	1	2019-08-14	1c = TDF/3TC/DTG	3		2022-01-27	Pregnant	2022-07-20	174	3-5 months	2	180	180	0	Yes	1	Suppressed	1		44762
6	IMPORTA-0312	1	2022-08-30	Waran Samuel Duku	Magwi PHCC	3	2020-02-03	35	Ijula	Married Polygamous	2	Housewife	1	3	3	44035	25	2	Known Pos on ART	2	3 visits	3	3	At Health Facility	1	Live Birth-LB	1	Already on ART	1	2018-08-06	1c = TDF/3TC/DTG	3		2020-02-03	Pregnant	2020-10-15	255	6+ months	3	72	72	0	No	2	NA	3	2020-04-15	-183	72
2	IMPORTA-0313	1	2022-08-30	Waran Samuel Duku	Magwi PHCC	3	2019-12-22	38	Palouonganyi	Married Polygamous	2	Housewife	1	3	3	43994			Known Pos on ART	2	3 visits	3	3	At Health Facility	1	Live Birth-LB	1	Already on ART	1	2020-05-22	1c = TDF/3TC/DTG	3		2019-12-22	Pregnant	2020-05-22	152	3-5 months	2	180	180	0	No	2	NA	3	2022-05-22	730	882
3	IMPORTA-0314	1	2022-08-30	Waran Samuel Duku	Magwi PHCC	3	2020-01-10	29	Kilio	Married Polygamous	2	Housewife	1	3	3	43919	30	2	Known Pos on ART	2	2 visits	2	2	At Health Facility	1	Live Birth-LB	1	Already on ART	1	2018-07-23	1c = TDF/3TC/DTG	3		2020-01-10	Pregnant	2020-03-23	73	<3 months	1	60	60	0	Yes	1	Suppressed	1	2020-03-23	0	73
4	IMPORTA-0315	1	2022-08-30	Waran Samuel Duku	Magwi PHCC	3	2020-01-10	37	Lubure	Married Monogamous	2	Housewife	1		3	43978	20	2	Known Pos on ART	2	3 visits	3	3	At Health Facility	1	Live Birth-LB	1	Already on ART	1		1c = TDF/3TC/DTG	3		2020-01-10	Pregnant	2020-05-18	129	3-5 months	2	120	120	0	No	2	NA	3	2020-04-21	-27	102
5	IMPORTA-0316	1	2022-08-30	Waran Samuel Duku	Magwi PHCC	3	2020-01-27	32	Obbo	Married Monogamous	2	Housewife	1	1	2	43936			Known Pos on ART	2	1 visit	1	1	At Health Facility	1	Live Birth-LB	1	New on ART -- in pregnancy	2	2020-01-27	1c = TDF/3TC/DTG	3		2020-01-27	Pregnant	2020-04-24	88	<3 months	1	90	90	0	No	2	NA	3	2020-04-24	0	88
12	IMPORTA-0317	1	2022-08-30	Waran Samuel Duku	Magwi PHCC	3	2020-10-28	35	Mugos	Married Polygamous	2	Housewife	1	3	3	44239	28	2	Known Pos on ART	2	3 visits	3	3	At Health Facility	1	Live Birth-LB	1	Already on ART	1	2013-04-27	1c = TDF/3TC/DTG	3		2020-10-28	Pregnant	2020-05-18				180	180	0	No	2	NA	3	2021-02-17	275	112
8	IMPORTA-0318	1	2022-08-30	Waran Samuel Duku	Magwi PHCC	3	2020-03-30	28	Kilio	Married Polygamous	2	Housewife	1	2	3	44180	20	2	Known Pos on ART	2	1 visit	1	1	At Health Facility	1	Live Birth-LB	1	Already on ART	1	2019-08-03	1c = TDF/3TC/DTG	3		2020-03-30	Pregnant	2020-05-30	61	<3 months	1	60	60	0	No	2	NA	3	2020-06-06	7	68
9	IMPORTA-0319	1	2022-08-30	Waran Samuel Duku	Magwi PHCC	3	2020-03-30	22	Lobure	Married Polygamous	2	Housewife	1		3	44158	16	2	Known Pos on ART	2	1 visit	1	1	At Health Facility	1	Live Birth-LB	1	Already on ART	1	2018-11-20	1c = TDF/3TC/DTG	3		2020-03-30	Pregnant	2020-04-24	25	<3 months	1	26	26	0	No	2	NA	3	2020-04-24	0	25
10	IMPORTA-0320	1	2022-08-30	Waran Samuel Duku	Magwi PHCC	3	2020-04-15	26	Kilio	Married Polygamous	2	Housewife	1	3	3	43968	20	2	Known Pos on ART	2	1 visit	1	1	At Health Facility	1	Live Birth-LB	1	Already on ART	1	2018-12-06	1c = TDF/3TC/DTG	3		2020-04-15	Pregnant	2021-04-15	365	6+ months	3	360	360	0	No	2	NA	3	2021-04-02	-13	352
11	IMPORTA-0321	1	2022-08-30	Waran Samuel Duku	Magwi PHCC	3	2020-10-19	27	Lobure	Married Polygamous	2	Housewife	1		3	44239	11	1	Known Pos on ART	2	1 visit	1	1	At Health Facility	1	Live Birth-LB	1	Already on ART	1	2017-04-20	1c = TDF/3TC/DTG	3		2020-10-19	Pregnant	2020-12-19	61	<3 months	1	60	60	0	Yes	1	Suppressed	1	2020-12-22	3	64
13	IMPORTA-0322	1	2022-08-30	Waran Samuel Duku	Magwi PHCC	3	2020-11-12	33	Kilio	Married Polygamous	2	Housewife	1	3	3	44361	24	2	Known Pos on ART	2	4 or more visits	4	3	At Health Facility	1	Live Birth-LB	1	Already on ART	1		1c = TDF/3TC/DTG	3		2020-11-12	Pregnant	2021-05-15	184	6+ months	3	180	180	0	No	2	NA	3	2021-08-06	83	267
14	IMPORTA-0323	1	2022-08-30	Waran Samuel Duku	Magwi PHCC	3	2021-04-30	38	Kilio	Married Polygamous	2	Housewife	1	3	3	44409			Known Pos on ART	2	4 or more visits	4	3	At Health Facility	1	Live Birth-LB	1	Already on ART	1	2018-06-18	1c = TDF/3TC/DTG	3		2021-04-30	Pregnant	2021-09-28	151	3-5 months	2	150	150	0	Yes	1	Suppressed	1	2021-09-28	0	151
15	IMPORTA-0324	1	2022-08-30	Waran Samuel Duku	Magwi PHCC	3	2021-04-26	36	Lobure	Married Polygamous	2	Housewife	1	3	3	44456	24	2	Known Pos on ART	2	3 visits	3	3	At Health Facility	1	Live Birth-LB	1	Already on ART	1	2013-02-15	1c = TDF/3TC/DTG	3		2021-04-26	Pregnant	2021-07-19	84	<3 months	1	83	83	0	Yes	1	Unsuppressed	2	2021-07-19	0	84
16	IMPORTA-0325	1	2022-08-30	Waran Samuel Duku	Magwi PHCC	3	2021-04-14	22	Lobure	Married Monogamous	2	Housewife	1	4	1	44512			Known Pos on ART	2	1 visit	1	1	At Health Facility	1	Live Birth-LB	1	Already on ART	1	2018-08-06	1c = TDF/3TC/DTG	3		2021-04-14	Pregnant	2021-10-13	182	6+ months	3	180	180	0	Yes	1	Suppressed	1	2021-10-13	0	182
17	IMPORTA-0326	1	2022-08-30	Waran Samuel Duku	Magwi PHCC	3	2021-05-15	36	Kilio	Married Monogamous	2	Housewife	1	3	3	44412	20	2	Known Pos on ART	2	2 visits	2	2	At Health Facility	1	Live Birth-LB	1	Already on ART	1	2019-03-11	1c = TDF/3TC/DTG	3		2021-05-15	Pregnant	2021-09-25	133	3-5 months	2	130	130	0	No	2	NA	3	2021-09-27	2	135
18	IMPORTA-0327	1	2022-08-30	Waran Samuel Duku	Magwi PHCC	3	2021-06-22	35	Obbo	Married Polygamous	2	Housewife	1	3	3	44367	20	2	Known Pos on ART	2	1 visit	1	1	At Health Facility	1	Live Birth-LB	1	Already on ART	1	2013-04-20	1c = TDF/3TC/DTG	3		2021-06-22	Pregnant	2021-10-01	101	3-5 months	2	98	98	0	No	2	NA	3	2021-10-05	4	105
19	IMPORTA-0328	1	2022-08-30	Waran Samuel Duku	Magwi PHCC	3	2021-10-08	31	Lobure	Married Monogamous	2	Housewife	1	3	3	44634	25	2	Known Pos on ART	2	4 or more visits	4	3	At Health Facility	1	Live Birth-LB	1	Already on ART	1	2019-02-26	1c = TDF/3TC/DTG	3		2021-10-08	Pregnant	2021-11-08	31	<3 months	1	30	30	0	No	2	NA	3	2022-02-28	112	143
20	IMPORTA-0329	1	2022-08-30	Waran Samuel Duku	Magwi PHCC	3	2021-10-08	28	Obbo	Married Monogamous	2	Housewife	1	3	3	44567	25	2	Known Pos on ART	2	4 or more visits	4	3	At Health Facility	1	Live Birth-LB	1	Already on ART	1	2018-04-04	1c = TDF/3TC/DTG	3		2021-10-08	Pregnant	2021-11-10	33	<3 months	1	30	30	0	No	2	NA	3	2021-11-04	-6	27
21	IMPORTA-0330	1	2022-08-30	Waran Samuel Duku	Magwi PHCC	3	2021-10-15	28	Mengo	Married Monogamous	2	Housewife	1	2	3	44603	20	2	Newly tested at ANC	1	1 visit	1	1	At home	2	Live Birth-LB	1	New on ART -- postpartum	2	2021-10-15	1c = TDF/3TC/DTG	3		2021-10-15	Pregnant	2022-04-14	181	6+ months	3	180	180	0	No	2	NA	3	2022-04-12	-2	179
22	IMPORTA-0331	1	2022-08-30	Waran Samuel Duku	Magwi PHCC	3	2021-12-14	22	Kilio	Married Polygamous	2	Housewife	1	2	3	44668	22	2	Known Pos on ART	2	1 visit	1	1	At Health Facility	1	Live Birth-LB	1	Already on ART	1	2019-06-16	1c = TDF/3TC/DTG	3		2021-12-14	Pregnant	2022-02-09	57	<3 months	1	55	55	0	No	2	NA	3	2022-02-16	7	64
23	IMPORTA-0332	1	2022-08-30	Waran Samuel Duku	Magwi PHCC	3	2021-12-10	24	Agoro	Married Polygamous	2	Housewife	1	2	3	44668	24	2	Known Pos on ART	2	1 visit	1	1	At Health Facility	1	Live Birth-LB	1	Already on ART	1	2021-06-26	1c = TDF/3TC/DTG	3		2021-12-27	Pregnant	2022-06-26	181	6+ months	3	181	0	181						44738
24	IMPORTA-0333	1	2022-08-30	Waran Samuel Duku	Magwi PHCC	3	2022-11-25	28	Omeo	Married Polygamous	2	Housewife	1	3	3	44652	22	2	Newly tested at ANC	1	1 visit	1	1	At Health Facility	1	Live Birth-LB	1	New on ART -- in pregnancy	2		1c = TDF/3TC/DTG	3		2021-11-25	Pregnant	2022-05-24	180	6+ months	3	180	0	180						44705
25	IMPORTA-0334	1	2022-08-30	Waran Samuel Duku	Magwi PHCC	3	2021-12-10	28	Diopok	Married Polygamous	2	Housewife	1	2	3	44724	20	2	Newly tested at ANC	1	4 or more visits	4	3	At Health Facility	1	Live Birth-LB	1	New on ART -- in pregnancy	2		1c = TDF/3TC/DTG	3		2021-12-10	Pregnant	2022-06-14	186	6+ months	3	336	180	156	Yes	1	Suppressed	1	2022-06-14	0	186
26	IMPORTA-0335	1	2022-08-30	Waran Samuel Duku	Magwi PHCC	3	2021-12-15	22	Obbo	Married Monogamous	2	Housewife	1	1	1	44726			Known Pos on ART	2	1 visit	1	1	At Health Facility	1	Live Birth-LB	1	Already on ART	1	2018-06-04	1c = TDF/3TC/DTG	3		2021-12-15	Pregnant	2022-06-14	181	6+ months	3	180	180	0	Yes	1	Suppressed	1	2022-06-14	0	181
27	IMPORTA-0336	1	2022-08-30	Waran Samuel Duku	Magwi PHCC	3	2021-12-23	23	Palwar	Married Polygamous	2	Housewife	1	2	3		10	1			1 visit	1	1	At Health Facility	1	Live Birth-LB	1	New on ART -- in pregnancy	2	2021-12-23	1c = TDF/3TC/DTG	3		2021-12-23	Breastfeeding	2022-06-22	181	6+ months	3	180	180	0	No	2	NA	3	2022-06-22	0	181
91	IMPORTA-0339	1	2022-09-02	Asega Philip Poru	Juba Teaching Hospital	1	2020-09-04	27	Muana	Married Monogamous	2	Housewife	1	1	3	44260	12	1	Known Pos on ART	2	4 or more visits	4	3	At Health Facility	1	Live Birth-LB	1	Already on ART	1	2018-07-22	1c = TDF/3TC/DTG	3		2020-09-04	Pregnant	2021-03-01	178	3-5 months	2	180	180	0	Yes	1	Unsuppressed	2	2021-03-04	3	181
92	IMPORTA-0340	1	2022-09-02	Asega Philip Poru	Juba Teaching Hospital	1	2020-09-10	25	Kator	Married Polygamous	2	Farming	2	2	3	44141			Known Pos on ART	2	2 visits	2	2	At Health Facility	1	Live Birth-LB	1	Already on ART	1	2019-08-28	1c = TDF/3TC/DTG	3		2020-09-10	Pregnant	2021-03-09	180	6+ months	3	180	180	0	Yes	1	Suppressed	1	2021-03-09	0	180
93	IMPORTA-0341	1	2022-09-02	Asega Philip Poru	Juba Teaching Hospital	1	2020-09-21	25	Gudele	Married Monogamous	2	Housewife	1		2	44252	16	2	Known Pos on ART	2	4 or more visits	4	3	At Health Facility	1	Live Birth-LB	1	Already on ART	1	2020-09-22	1c = TDF/3TC/DTG	3		2020-09-21	Pregnant	2021-03-22	182	6+ months	3	180	180	0	Yes	1	Suppressed	1	2021-01-27	-54	128
94	IMPORTA-0342	1	2022-09-02	Asega Philip Poru	Juba Teaching Hospital	1	2020-09-21	30	Kondokoro	Married Monogamous	2	Housewife	1	3	3	44254	20	2	Known Pos on ART	2	3 visits	3	3	At Health Facility	1	Live Birth-LB	1	Already on ART	1	2016-04-10	1c = TDF/3TC/DTG	3		2020-09-21	Pregnant	2021-03-19	179	3-5 months	2	180	180	0	Yes	1	Suppressed	1	2021-09-09	174	353
95	IMPORTA-0343	1	2022-09-02	Asega Philip Poru	Juba Teaching Hospital	1	2020-09-11	29	Sherikat	Married Monogamous	2	Unemployed	1	3	3	44256	16	2	Known Pos on ART	2	1 visit	1	1	At home	2	Live Birth-LB	1	Already on ART	1	2019-12-11	1c = TDF/3TC/DTG	3		2020-09-11	Pregnant	2021-03-10	180	6+ months	3	180	180	0	Yes	1	Suppressed	1	2021-04-09	30	210
96	IMPORTA-0344	1	2022-09-02	Asega Philip Poru	Juba Teaching Hospital	1	2020-09-16	23	Nyakuron	Married Polygamous	2	Housewife	1	3	3	44239			Known Pos on ART	2	1 visit	1	1	At Health Facility	1	Live Birth-LB	1	Already on ART	1	2011-03-02	1c = TDF/3TC/DTG	3		2020-09-16	Pregnant	2020-12-10	85	<3 months	1	90	90	0	Yes	1	Suppressed	1	2020-12-10	0	85
97	IMPORTA-0345	1	2022-09-02	Asega Philip Poru	Juba Teaching Hospital	1	2020-09-21	34	Nor Rumula	Married Polygamous	2	Housewife	1	3	3	44180	20	2	Known Pos on ART	2	3 visits	3	3	At Health Facility	1			Already on ART	1	2014-07-25	1c = TDF/3TC/DTG	3		2020-09-21	Pregnant	2021-03-18	178	3-5 months	2	180	180	0	Yes	1	Suppressed	1	2021-03-16	-2	176
98	IMPORTA-0346	1	2022-09-02	Asega Philip Poru	Juba Teaching Hospital	1	2020-09-24	24	Nyakuron	Married Monogamous	2	Housewife	1		2	44216	20	2	Known Pos on ART	2	3 visits	3	3	At Health Facility	1	Live Birth-LB	1	Already on ART	1		1c = TDF/3TC/DTG	3		2020-09-09	Pregnant	2021-03-23	195	6+ months	3	180	180	0	No	2	NA	3	2021-04-08	16	211
99	IMPORTA-0347	1	2022-09-02	Asega Philip Poru	Juba Teaching Hospital	1	2021-09-24	32	Gurei			Housewife	1	3	3	44213	28	2	Known Pos on ART	2				At Health Facility	1	Live Birth-LB	1	Already on ART	1	2019-10-08	1c = TDF/3TC/DTG	3		2020-09-24	Pregnant	2021-03-16	173	3-5 months	2	180	180	0	Yes	1	Suppressed	1	2021-03-16	0	173
100	IMPORTA-0348	1	2022-09-02	Asega Philip Poru	Juba Teaching Hospital	1	2020-09-24	25	Sherikat	Married Monogamous	2	Unemployed	1	1	2	44272	14	1	Known Pos on ART	2				At Health Facility	1	Live Birth-LB	1	Already on ART	1	2018-10-05	1c = TDF/3TC/DTG	3		2020-09-24	Pregnant	2021-03-23	180	6+ months	3	180	180	0	Yes	1	Suppressed	1	2021-02-02	-49	131
101	IMPORTA-0349	1	2022-09-02	Asega Philip Poru	Juba Teaching Hospital	1	2020-10-05	27	Gorom	Married Monogamous	2	Unemployed	1		3	44218	22	2	Known Pos on ART	2	3 visits	3	3	At Health Facility	1	Live Birth-LB	1	Already on ART	1	2013-04-29	1c = TDF/3TC/DTG	3		2020-10-05	Pregnant	2021-04-01	178	3-5 months	2	180	180	0	Yes	1	Suppressed	1	2021-04-10	9	187
102	IMPORTA-0350	1	2022-09-02	Asega Philip Poru	Juba Teaching Hospital	1	2020-10-07	32	Kator	Married Monogamous	2	Unemployed	1	3		44241	19	2	Known Pos on ART	2	1 visit	1	1	At home	2	Live Birth-LB	1	Already on ART	1	2016-12-13	1c = TDF/3TC/DTG	3		2020-10-07	Pregnant	2021-04-06	181	6+ months	3	180	180	0	Yes	1	Suppressed	1	2021-04-06	0	181
103	IMPORTA-0351	1	2022-09-02	Asega Philip Poru	Juba Teaching Hospital	1	2020-10-13	38	Lowilili	Married Polygamous	2	Housewife	1	3		44218	20	2	Known Pos on ART	2	3 visits	3	3	At Health Facility	1	Live Birth-LB	1	Already on ART	1	2015-02-13	1c = TDF/3TC/DTG	3		2020-10-13	Pregnant	2021-04-09	178	3-5 months	2	180	180	0	No	2	NA	3	2021-04-29	20	198
104	IMPORTA-0352	1	2022-09-02	Asega Philip Poru	Juba Teaching Hospital	1	2020-10-13	23	Managten	Married Monogamous	2	Housewife	1	1	2	44257	12	1	Newly tested at ANC	1	1 visit	1	1			Live Birth-LB	1	New on ART -- in pregnancy	2	2020-10-13	1c = TDF/3TC/DTG	3		2020-10-13	Pregnant	2021-04-10	179	3-5 months	2	180	180	0	Yes	1	Suppressed	1	2021-04-10	0	179
105	IMPORTA-0353	1	2022-09-02	Asega Philip Poru	Juba Teaching Hospital	1	2020-10-14	31	Gudele	Married Monogamous	2	Salaried Employee	2	3	3	44220	22	2	Known Pos on ART	2	4 or more visits	4	3	At Health Facility	1			Already on ART	1	2020-04-17	1c = TDF/3TC/DTG	3		2020-10-14	Pregnant	2021-04-12	180	6+ months	3	180	180	0	No	2	NA	3	2021-04-12	0	180
106	IMPORTA-0354	1	2022-09-02	Asega Philip Poru	Juba Teaching Hospital	1	2020-10-15	30	Gurei	Married Monogamous	2	Business (Man/Women)/trader	2	3	3	44218	24	2	Known Pos on ART	2	3 visits	3	3	At Health Facility	1	Live Birth-LB	1	Already on ART	1	2020-09-15	1c = TDF/3TC/DTG	3		2020-10-15	Pregnant	2021-04-09	176	3-5 months	2	180	180	0	Yes	1	Suppressed	1	2021-04-06	-3	173
107	IMPORTA-0355	1	2022-09-02	Asega Philip Poru	Juba Teaching Hospital	1	2020-10-19	25	Sherikat	Married Polygamous	2	Housewife	1	3	3	44149	36	2	Known Pos on ART	2	2 visits	2	2	At Health Facility	1	Live Birth-LB	1	Already on ART	1	2015-01-07	1c = TDF/3TC/DTG	3		2020-10-19	Pregnant	2021-04-19	182	6+ months	3	180	180	0	No	2	NA	3	2021-04-29	10	192
108	IMPORTA-0356	1	2022-09-02	Asega Philip Poru	Juba Teaching Hospital	1	2020-10-20	24	Lologo	Married Monogamous	2	Housewife	1		2	44149	39	2	Known Pos on ART	2	2 visits	2	2	At Health Facility	1	Live Birth-LB	1	Already on ART	1	2017-06-12	1c = TDF/3TC/DTG	3		2020-10-20	Pregnant	2021-04-14	176	3-5 months	2	180	180	0	No	2	NA	3	2021-04-22	8	184
110	IMPORTA-0358	1	2022-09-02	Asega Philip Poru	Juba Teaching Hospital	1	2020-10-20	33	Sherikat	Married Polygamous	2	Business (Man/Women)/trader	2	3		44312	12	1	Known Pos on ART	2	4 or more visits	4	3	At Health Facility	1	Live Birth-LB	1	Already on ART	1	2019-04-21	1c = TDF/3TC/DTG	3		2020-10-20	Pregnant	2021-04-19	181	6+ months	3	180	180	0	Yes	1	Suppressed	1	2021-04-19	0	181
111	IMPORTA-0359	1	2022-09-02	Asega Philip Poru	Juba Teaching Hospital	1	2020-10-21	36	Kator	Married Monogamous	2	Business (Man/Women)/trader	2		2	44186	26	2	Newly tested at ANC	1	3 visits	3	3	At Health Facility	1	Live Birth-LB	1	New on ART -- in pregnancy	2	2020-10-21	1c = TDF/3TC/DTG	3		2020-10-21	Breastfeeding	2021-04-19	180	6+ months	3	180	180	0	Yes	1	Unsuppressed	2	2021-07-02	74	254
112	IMPORTA-0360	1	2022-09-02	Asega Philip Poru	Juba Teaching Hospital	1	2020-10-21	33	Jebel Gondokoro	Married Monogamous	2	Business (Man/Women)/trader	2	3	3	44187	28	2	Known Pos on ART	2	2 visits	2	2	At home	2	Live Birth-LB	1	Already on ART	1	2017-04-01	1c = TDF/3TC/DTG	3		2020-10-21	Pregnant	2021-04-19	180	6+ months	3	180	180	0	Yes	1	Suppressed	1	2021-04-19	0	180
113	IMPORTA-0361	1	2022-09-02	Asega Philip Poru	Juba Teaching Hospital	1	2020-10-22	29	Konyokonyo	Married Monogamous	2	Salaried Employee	2		3	44310	12	1	Known Pos on ART	2	1 visit	1	1	At Health Facility	1	Live Birth-LB	1	Already on ART	1	2014-11-24	1c = TDF/3TC/DTG	3		2020-10-22	Pregnant	2021-04-21	181	6+ months	3	180	180	0	Yes	1	Suppressed	1	2021-04-13	-8	173
114	IMPORTA-0362	1	2022-09-02	Asega Philip Poru	Juba Teaching Hospital	1	2020-10-28	28	Referudum	Married Monogamous	2	Unemployed	1	2	3	44179	28	2	Known Pos on ART	2	2 visits	2	2	At Health Facility	1	Live Birth-LB	1	Already on ART	1	2018-08-24	1c = TDF/3TC/DTG	3		2020-10-28	Pregnant	2021-04-27	181	6+ months	3	180	180	0	Yes	1	Suppressed	1	2021-04-12	-15	166
115	IMPORTA-0363	1	2022-09-02	Asega Philip Poru	Juba Teaching Hospital	1	2020-11-03	30	Gumbo	Married Monogamous	2	Housewife	1	3	3	44223	26	2	Newly tested at ANC	1	1 visit	1	1	At Health Facility	1	Live Birth-LB	1	New on ART -- in pregnancy	2	2020-11-03	1c = TDF/3TC/DTG	3		2020-11-03	Pregnant	2021-05-03	181	6+ months	3	180	180	0	Yes	1	Suppressed	1	2021-07-26	84	265
116	IMPORTA-0364	1	2022-09-02	Asega Philip Poru	Juba Teaching Hospital	1	2020-11-06	35	Giada	Married Polygamous	2	Housewife	1	3	3	44337	14	1	Known Pos on ART	2	4 or more visits	4	3	At Health Facility	1	Live Birth-LB	1	Already on ART	1		1c = TDF/3TC/DTG	3		2020-11-06	Pregnant	2021-05-06	181	6+ months	3	180	180	0	Yes	1	Suppressed	1	2021-12-03	211	392
117	IMPORTA-0365	1	2022-09-03	Asega Philip Poru	Juba Teaching Hospital	1	2020-11-12	30	Gumbo	Married Monogamous	2	Housewife	1	3	3	44336	13	1	Known Pos on ART	2				At Health Facility	1	Live Birth-LB	1	Already on ART	1	2017-04-06	1c = TDF/3TC/DTG	3		2020-11-12	Pregnant	2021-05-11	180	6+ months	3	180	180	0	Yes	1	Suppressed	1	2021-05-16	5	185
118	IMPORTA-0366	1	2022-09-03	Asega Philip Poru	Juba Teaching Hospital	1	2020-11-23	25	Nyakuron	Married Monogamous	2	Unemployed	1	1	2	44266	20	2	Known Pos on ART	2	3 visits	3	3	At Health Facility	1	Live Birth-LB	1	Already on ART	1	2019-06-06	1c = TDF/3TC/DTG	3		2020-11-23	Pregnant	2021-05-21	179	3-5 months	2	180	180	0	No	2	NA	3	2021-05-20	-1	178
119	IMPORTA-0367	1	2022-09-05	Asega Philip Poru	Juba Teaching Hospital	1	2020-11-30	23	Hai Referudum	Married Monogamous	2	Housewife	1	2	3	44393	25	2	Newly tested at ANC	1				At Health Facility	1	Live Birth-LB	1	New on ART -- in pregnancy	2	2020-11-30	1c = TDF/3TC/DTG	3		2020-11-30	Pregnant	2021-05-28	179	3-5 months	2	180	180	0	No	2	NA	3	2021-05-28	0	179
120	IMPORTA-0368	1	2022-09-05	Asega Philip Poru	Juba Teaching Hospital	1	2020-12-04	28	Sherikat	Married Polygamous	2	Housewife	1	3	3	44193	38	2	Known Pos on ART	2	1 visit	1	1	At Health Facility	1			Already on ART	1	2020-02-04	1c = TDF/3TC/DTG	3		2020-12-04	Pregnant	2021-06-03	181	6+ months	3	180	180	0	Yes	1	Suppressed	1	2021-06-05	2	183
121	IMPORTA-0369	1	2022-09-05	Asega Philip Poru	Juba Teaching Hospital	1	2020-12-09	24	Sherikat	Married Polygamous	2	Housewife	1	3	3	44338	20	2	Newly tested at ANC	1				At home	2	Live Birth-LB	1	New on ART -- in pregnancy	2	2020-12-09	1c = TDF/3TC/DTG	3		2020-12-09	Pregnant	2021-06-07	180	6+ months	3	180	180	0	Yes	1	Suppressed	1	2021-06-28	21	201
122	IMPORTA-0370	1	2022-09-05	Asega Philip Poru	Juba Teaching Hospital	1	2020-12-22	19	Aru Junction	Married Monogamous	2	Farming	2	2	3	44255	34	2	Known Pos on ART	2	1 visit	1	1	At Health Facility	1	Live Birth-LB	1	Already on ART	1	2018-10-30	1c = TDF/3TC/DTG	3		2020-12-22	Pregnant	2021-07-19	209	6+ months	3	210	210	0	Yes	1	Suppressed	1	2021-08-28	40	249
123	IMPORTA-0371	1	2022-09-02	Asega Philip Poru	Juba Teaching Hospital	1	2020-12-28	32	Rajaf	Married Polygamous	2	Housewife	1	3		44384	8	1	Newly tested at ANC	1	1 visit	1	1	At Health Facility	1	Live Birth-LB	1	New on ART -- in pregnancy	2	2020-12-28	1c = TDF/3TC/DTG	3		2020-12-28	Pregnant	2021-06-25	179	3-5 months	2	180	180	0	Yes	1	Suppressed	1	2021-06-27	2	181
124	IMPORTA-0372	1	2022-09-05	Asega Philip Poru	Juba Teaching Hospital	1	2021-01-11	25	Gumbo	Married Monogamous	2	Other Uniformed forces (Police, Wildlife, Prisons, Fire Brigade)	2	2	3	44290	26	2	Known Pos on ART	2	2 visits	2	2	At Health Facility	1	Live Birth-LB	1	Already on ART	1	2018-02-15	1c = TDF/3TC/DTG	3		2021-01-11	Pregnant	2021-07-08	178	3-5 months	2	180	180	0	Yes	1	Suppressed	1	2022-01-26	202	380
125	IMPORTA-0373	1	2022-09-05	Asega Philip Poru	Juba Teaching Hospital	1	2021-01-18	38	Gudele	Married Monogamous	2	Student	1	2		44366			Known Pos on ART	2	1 visit	1	1	At Health Facility	1	Live Birth-LB	1	Already on ART	1	2020-01-23	1c = TDF/3TC/DTG	3		2021-01-18	Pregnant	2021-07-15	178	3-5 months	2	180	180	0	Yes	1	Suppressed	1	2021-12-17	155	333
126	IMPORTA-0374	1	2022-09-05	Asega Philip Poru	Juba Teaching Hospital	1	2021-01-11	20	Sherikat	Married Monogamous	2	Housewife	1	1	2	44320	19	2	Newly tested at ANC	1	4 or more visits	4	3	At Health Facility	1	Live Birth-LB	1	New on ART -- in pregnancy	2	2021-01-11	1c = TDF/3TC/DTG	3		2021-01-11	Pregnant	2021-07-08	178	3-5 months	2	180	180	0	Yes	1	Suppressed	1	2021-12-17	162	340
127	IMPORTA-0375	1	2022-09-05	Asega Philip Poru	Juba Teaching Hospital	1	2022-01-13	29	Nyakuron	Married Polygamous	2	Housewife	1	3	3	44557	38	2	Newly tested at ANC	1	3 visits	3	3	At Health Facility	1	Live Birth-LB	1	New on ART -- in pregnancy	2	2021-01-13	1c = TDF/3TC/DTG	3		2021-01-13	Pregnant	2021-07-13	181	6+ months	3	180	180	0	No	2	NA	3	2021-07-10	-3	178
128	IMPORTA-0376	1	2022-09-05	Asega Philip Poru	Juba Teaching Hospital	1	2021-01-19	32	Gurei	Married Polygamous	2	Housewife	1	3	3	44341	18	2	Newly tested at ANC	1	1 visit	1	1	At Health Facility	1	Live Birth-LB	1	New on ART -- in pregnancy	2	2021-01-19	1c = TDF/3TC/DTG	3		2021-01-19	Pregnant	2021-07-16	178	3-5 months	2	180	180	0	No	2	NA	3	2021-07-22	6	184
129	IMPORTA-0377	1	2022-09-05	Asega Philip Poru	Juba Teaching Hospital	1	2021-01-20	24	Mauna	Married Monogamous	2	Business (Man/Women)/trader	2	1	2	44367	16	2	Newly tested at ANC	1	4 or more visits	4	3	At Health Facility	1	Live Birth-LB	1	New on ART -- in pregnancy	2	2021-01-20	1c = TDF/3TC/DTG	3		2021-01-20	Pregnant	2021-07-19	180	6+ months	3	180	180	0	No	2	NA	3	2021-07-19	0	180
130	IMPORTA-0378	1	2022-09-05	Asega Philip Poru	Juba Teaching Hospital	1	2021-01-27	27	Jebel	Married Polygamous	2	Housewife	1	3		44290	28	2	Newly tested at ANC	1	3 visits	3	3	At home	2	Live Birth-LB	1	New on ART -- in pregnancy	2	2021-01-27	1c = TDF/3TC/DTG	3		2021-01-27	Pregnant	2021-07-26	180	6+ months	3	180	180	0	Yes	1	Suppressed	1	2021-07-14	-12	168
131	IMPORTA-0379	1	2022-09-05	Asega Philip Poru	Juba Teaching Hospital	1	2021-02-01	32	Gudele	Married Monogamous	2	Housewife	1	3		44380	16	2	Known Pos on ART	2	2 visits	2	2	At Health Facility	1	Live Birth-LB	1	Already on ART	1	2020-12-02	1c = TDF/3TC/DTG	3		2021-02-01	Pregnant	2021-07-23	172	3-5 months	2	180	180	0	No	2	NA	3	2021-07-31	8	180
132	IMPORTA-0380	1	2022-09-05	Asega Philip Poru	Juba Teaching Hospital	1	2021-02-10	33	Munuki	Married Polygamous	2	Housewife	1	3	3	44310	32	2	Known Pos on ART	2	2 visits	2	2	At Health Facility	1	Live Birth-LB	1	Already on ART	1	2018-03-15	1c = TDF/3TC/DTG	3		2021-02-10	Pregnant	2021-08-09	180	6+ months	3	180	180	0	Yes	1	Suppressed	1	2021-09-06	28	208
133	IMPORTA-0381	1	2022-09-05	Asega Philip Poru	Juba Teaching Hospital	1	2021-02-19	26	Sherikat	Married Polygamous	2	Military Personnel	2	3	3	44384	16	2	Known Pos on ART	2				At Health Facility	1	Live Birth-LB	1	Already on ART	1	2014-02-06	1c = TDF/3TC/DTG	3		2021-02-19	Pregnant	2021-07-16	147	3-5 months	2	150	150	0	Yes	1	Suppressed	1	2021-07-15	-1	146
134	IMPORTA-0382	1	2022-09-05	Asega Philip Poru	Juba Teaching Hospital	1	2021-03-01	31	Gumbo Sherikat	Married Polygamous	2	Housewife	1		3	44430	16	2	Known Pos on ART	2	4 or more visits	4	3	At Health Facility	1	Live Birth-LB	1	Already on ART	1	2018-05-14	1c = TDF/3TC/DTG	3		2021-03-01	Pregnant	2021-08-19	171	3-5 months	2	180	180	0	Yes	1	Suppressed	1	2022-01-02	136	307
135	IMPORTA-0383	1	2022-09-05	Asega Philip Poru	Juba Teaching Hospital	1	2021-03-11	29	Sherikat	Married Polygamous	2	Housewife	1	3	3	44331	28	2	Known Pos on ART	2	1 visit	1	1	At Health Facility	1	Live Birth-LB	1	Already on ART	1	2016-03-25	1c = TDF/3TC/DTG	3		2021-03-11	Pregnant	2021-09-10	183	6+ months	3	180	180	0	Yes	1	Suppressed	1	2021-09-03	-7	176
136	IMPORTA-0384	1	2022-09-05	Asega Philip Poru	Juba Teaching Hospital	1	2021-04-20	38	Referudum	Married Monogamous	2	Housewife	1	3	3	44527	8	1	Newly tested at ANC	1	2 visits	2	2	At Health Facility	1	Live Birth-LB	1	New on ART -- in pregnancy	2	2021-04-20	1c = TDF/3TC/DTG	3		2021-04-20	Pregnant	2021-11-19	213	6+ months	3	210	210	0	Yes	1	Suppressed	1	2021-11-11	-8	205
137	IMPORTA-0385	1	2022-09-05	Asega Philip Poru	Juba Teaching Hospital	1	2021-04-26	30	Tongpiny	Married Monogamous	2	Business (Man/Women)/trader	2	1	2	44412	22	2	Newly tested at ANC	1				At Health Facility	1	Live Birth-LB	1	New on ART -- in pregnancy	2	2021-04-26	1c = TDF/3TC/DTG	3		2022-04-26	Pregnant	2021-10-26				180	180	0	Yes	1	Suppressed	1	2021-10-12	-14
138	IMPORTA-0386	1	2022-09-05	Asega Philip Poru	Juba Teaching Hospital	1	2021-05-10	40	Gumbo	Married Monogamous	2	Business (Man/Women)/trader	2	2	3	44691	16	2	Newly tested at ANC	1				At Health Facility	1	Live Birth-LB	1	New on ART -- in pregnancy	2		1c = TDF/3TC/DTG	3		2021-05-10	Pregnant	2021-11-09	183	6+ months	3	180	180	0	Yes	1	Suppressed	1	2021-11-10	1	184
139	IMPORTA-0387	1	2022-09-05	Asega Philip Poru	Juba Teaching Hospital	1	2021-05-20	25	Jebel	Married Monogamous	2	Housewife	1	3	3	44402	26	2	Newly tested at ANC	1	2 visits	2	2	At Health Facility	1	Live Birth-LB	1	New on ART -- in pregnancy	2	2021-05-20	1c = TDF/3TC/DTG	3		2021-05-20	Pregnant	2021-11-19	183	6+ months	3	180	180	0	Yes	1	Unsuppressed	2	2021-11-19	0	183
140	IMPORTA-0388	1	2022-09-05	Asega Philip Poru	Juba Teaching Hospital	1	2021-07-14	22	Hai Gabat	Married Monogamous	2	Unemployed	1	4	1	44577	12	1	Newly tested at ANC	1	4 or more visits	4	3	At Health Facility	1	Live Birth-LB	1	New on ART -- in pregnancy	2	2021-07-14	1c = TDF/3TC/DTG	3		2021-07-14	Pregnant	2021-10-14	92	3-5 months	2	90	90	0	Yes	1	Suppressed	1	2021-10-08	-6	86
141	IMPORTA-0389	1	2022-09-05	Asega Philip Poru	Juba Teaching Hospital	1	2021-07-28	21	Lemon Gaba	Married Monogamous	2	Housewife	1	1	2	44455	28	2	Known Pos on ART	2				At Health Facility	1	Live Birth-LB	1	Already on ART	1	2017-02-12	1c = TDF/3TC/DTG	3		2021-07-28	Pregnant	2022-01-27	183	6+ months	3	180	180	0	Yes	1	Suppressed	1	2022-01-26	-1	182
142	IMPORTA-0390	1	2022-09-05	Asega Philip Poru	Juba Teaching Hospital	1	2021-08-05	24	Gudele	Married Monogamous	2	Salaried Employee	2	4	1	44522			Known Pos on ART	2	2 visits	2	2	At Health Facility	1	Live Birth-LB	1	Already on ART	1	2021-08-05	1c = TDF/3TC/DTG	3		2021-08-05	Pregnant	2022-02-02	181	6+ months	3	180	180	0	Yes	1	Suppressed	1	2022-02-02	0	181
143	IMPORTA-0391	1	2022-09-05	Asega Philip Poru	Juba Teaching Hospital	1	2021-08-13	24	Giada	Married Monogamous	2	Student	1	3		44504			Newly tested at ANC	1	3 visits	3	3	At Health Facility	1	Live Birth-LB	1	New on ART -- in pregnancy	2	2021-08-13	1c = TDF/3TC/DTG	3		2021-08-13	Pregnant	2022-02-10	181	6+ months	3	180	180	0	No	2	NA	3	2022-01-17	-24	157
144	IMPORTA-0392	1	2022-09-05	Asega Philip Poru	Juba Teaching Hospital	1	2021-09-13	20	Nyakuron	Married Monogamous	2	Business (Man/Women)/trader	2	1	1	44629	12	1	Known Pos on ART	2	4 or more visits	4	3	At Health Facility	1	Live Birth-LB	1	Already on ART	1	2019-03-01	1c = TDF/3TC/DTG	3		2021-09-13	Pregnant	2022-03-04	172	3-5 months	2	180	180	0	Yes	1	Suppressed	1	2022-03-22	18	190
145	IMPORTA-0393	1	2022-09-05	Asega Philip Poru	Juba Teaching Hospital	1	2021-09-23	32	Gudele	Married Monogamous	2	Business (Man/Women)/trader	2	3	3	44644	12	1	Known Pos on ART	2	1 visit	1	1	At Health Facility	1	Live Birth-LB	1	Already on ART	1	2017-06-15	1c = TDF/3TC/DTG	3		2021-09-23	Pregnant	2022-03-23	181	6+ months	3	180	180	0	No	2	NA	3	2022-04-08	16	197
146	IMPORTA-0394	1	2022-09-05	Asega Philip Poru	Juba Teaching Hospital	1	2021-12-14	21	Hai Jalaba	Married Monogamous	2	Housewife	1	1	1	44749	12	1	Newly tested at ANC	1	4 or more visits	4	3	At Health Facility	1	Live Birth-LB	1	New on ART -- in pregnancy	2	2021-12-14	1c = TDF/3TC/DTG	3		2021-12-14	Pregnant	2022-03-14	90	3-5 months	2	90	90	0	No	2	NA	3	2022-03-15	1	91
148	IMPORTA-0396	1	2022-09-06	Asega Philip Poru	Juba Teaching Hospital	1	2021-06-11	30	Darelsalam	Married Monogamous	2	Housewife	1	3	3	44468	22	2	Known Pos on ART	2	4 or more visits	4	3	At Health Facility	1	Live Birth-LB	1	Already on ART	1	2019-08-05	1c = TDF/3TC/DTG	3		2021-06-11	Pregnant	2021-12-10	182	6+ months	3	180	180	0	Yes	1	Suppressed	1	2022-01-10	31	213
149	IMPORTA-0397	1	2022-09-06	Asega Philip Poru	Juba Teaching Hospital	1	2021-06-14	27	Check Point	Married Monogamous	2	Housewife	1		3	44394	32	2	Known Pos on ART	2	4 or more visits	4	3	At Health Facility	1	Live Birth-LB	1	Already on ART	1	2021-02-21	1c = TDF/3TC/DTG	3		2021-06-14	Pregnant	2021-11-18	157	3-5 months	2	150	150	0	No	2	NA	3	2022-03-21	123	280
150	IMPORTA-0398	1	2022-09-06	Asega Philip Poru	Juba Teaching Hospital	1	2021-09-06	29	Gudele	Married Monogamous	2	Housewife	1	3	3	44539	24	2	Known Pos on ART	2	1 visit	1	1	At Health Facility	1	Live Birth-LB	1	Already on ART	1	2017-02-07	1c = TDF/3TC/DTG	3		2022-09-06	Pregnant	2022-03-03				180	180	0	Yes	1	Suppressed	1	2022-03-03	0
151	IMPORTA-0399	1	2022-09-06	Asega Philip Poru	Juba Teaching Hospital	1	2021-10-01	33	Gumbo	Married Monogamous	2	Business (Man/Women)/trader	2	3	3	44557	26	2	Known Pos on ART	2				At Health Facility	1	Live Birth-LB	1	Already on ART	1	2013-03-31	1c = TDF/3TC/DTG	3		2021-10-01	Pregnant	2022-05-30	241	6+ months	3	240	240	0	No	2	NA	3	2022-06-07	8	249
152	IMPORTA-0400	1	2022-09-06	Asega Philip Poru	Juba Teaching Hospital	1	2021-10-11	23	Mauna	Married Monogamous	2	Housewife	1		1	44618	20	2	Newly tested at ANC	1	1 visit	1	1	At Health Facility	1	Live Birth-LB	1	Already on ART	1	2021-10-11	1c = TDF/3TC/DTG	3		2021-10-11	Pregnant	2022-01-12	93	3-5 months	2	90	90	0	No	2	NA	3	2022-01-08	-4	89
153	IMPORTA-0401	1	2022-09-06	Asega Philip Poru	Juba Teaching Hospital	1	2021-10-11	25	Gudele 2	Married Monogamous	2	Military Personnel	2	3	3	44625	20	2	Known Pos on ART	2	1 visit	1	1	At Health Facility	1	Live Birth-LB	1	Already on ART	1	2019-07-16	1c = TDF/3TC/DTG	3		2021-10-11	Pregnant	2022-04-11	182	6+ months	3	180	180	0	Yes	1	Suppressed	1	2022-04-11	0	182
154	IMPORTA-0402	1	2022-09-06	Asega Philip Poru	Juba Teaching Hospital	1	2021-10-14	32	Gumbo	Married Monogamous	2	Housewife	1	3	3	44631	16	2	Newly tested at ANC	1	1 visit	1	1	At Health Facility	1	Live Birth-LB	1	Already on ART	1	2021-10-14	1c = TDF/3TC/DTG	3		2021-10-14	Pregnant	2022-04-19	187	6+ months	3	180	180	0	Yes	1	Suppressed	1	2022-04-15	-4	183
155	IMPORTA-0403	1	2022-09-06	Asega Philip Poru	Juba Teaching Hospital	1	2021-10-28	24	Hai Jalaba	Married Monogamous	2	Housewife	1	3	1	44617	34	2	Newly tested at ANC	1	1 visit	1	1	At Health Facility	1	Live Birth-LB	1	New on ART -- in pregnancy	2	2021-10-28	1c = TDF/3TC/DTG	3		2021-10-28	Pregnant	2022-01-26	90	3-5 months	2	90	90	0	No	2	NA	3	2022-01-27	1	91
156	IMPORTA-0404	1	2022-09-06	Asega Philip Poru	Juba Teaching Hospital	1	2021-11-09	22	Gondororo	Married Monogamous	2	Housewife	1	1	2	44663			Known Pos on ART	2	3 visits	3	3	At Health Facility	1	Live Birth-LB	1	Already on ART	1	2021-06-08	1c = TDF/3TC/DTG	3		2021-11-09	Pregnant	2022-03-03	114	3-5 months	2	120	120	0	No	2	NA	3	2022-04-28	56	170
157	IMPORTA-0405	1	2022-09-06	Asega Philip Poru	Juba Teaching Hospital	1	2021-11-16	38	Managaten	Married Monogamous	2	Housewife	1	3	3	44705			Newly tested at ANC	1	1 visit	1	1	At Health Facility	1	Live Birth-LB	1	New on ART -- in pregnancy	2	2021-11-16	1c = TDF/3TC/DTG	3		2021-11-16	Pregnant	2022-02-15	91	3-5 months	2	90	90	0	No	2	NA	3	2022-02-14	-1	90
158	IMPORTA-0406	1	2022-09-06	Asega Philip Poru	Juba Teaching Hospital	1	2021-11-24	33	Kator	Married Monogamous	2	Housewife	1	3	3	44706	18	2	Known Pos on ART	2				At Health Facility	1	Live Birth-LB	1	Already on ART	1	2014-04-23	1c = TDF/3TC/DTG	3		2021-11-24	Pregnant	2022-05-23	180	6+ months	3	180	180	0	Yes	1	Suppressed	1	2022-06-12	20	200
159	IMPORTA-0407	1	2022-09-06	Asega Philip Poru	Juba Teaching Hospital	1	2021-12-02	29	Gudele	Married Monogamous	2	Housewife	1	2	3	44675	16	2	Known Pos on ART	2	4 or more visits	4	3	At Health Facility	1	Live Birth-LB	1	Already on ART	1	2013-11-26	1c = TDF/3TC/DTG	3		2021-12-02	Pregnant	2022-03-02	90	3-5 months	2	90	90	0	No	2	NA	3	2022-03-13	11	101
160	IMPORTA-0408	1	2022-09-06	Asega Philip Poru	Juba Teaching Hospital	1	2021-12-06	35	Nyakuron	Married Polygamous	2	Housewife	1	3	3	44693			Newly tested at ANC	1	4 or more visits	4	3	At Health Facility	1	Live Birth-LB	1	New on ART -- in pregnancy	2	2021-12-06	1c = TDF/3TC/DTG	3		2021-12-06	Pregnant	2022-03-04	88	<3 months	1	90	90	0	No	2	NA	3	2022-03-11	7	95
161	IMPORTA-0409	1	2022-09-06	Asega Philip Poru	Juba Teaching Hospital	1	2021-12-08	20	Jebel Nyoka	Married Monogamous	2	Housewife	1	1	2	44563	32	2	Newly tested at ANC	1	1 visit	1	1	At Health Facility	1	Live Birth-LB	1	New on ART -- in pregnancy	2	2021-12-08	1c = TDF/3TC/DTG	3		2021-12-08	Pregnant	2022-03-08	90	3-5 months	2	90	90	0	No	2	NA	3	2022-03-18	10	100
162	IMPORTA-0410	1	2022-09-06	Asega Philip Poru	Juba Teaching Hospital	1	2022-01-04	21	Gudele	Married Monogamous	2	Housewife	1	6	1	44683	20	2	Newly tested at ANC	1	1 visit	1	1	At Health Facility	1	Live Birth-LB	1	New on ART -- in pregnancy	2	2022-01-04	1c = TDF/3TC/DTG	3		2022-01-04	Pregnant	2022-04-07	93	3-5 months	2	90	90	0	Yes	1	Suppressed	1	2022-03-20	-18	75
163	IMPORTA-0411	1	2022-09-06	Asega Philip Poru	Juba Teaching Hospital	1	2022-01-05	33	Hai Gabat	Married Monogamous	2	Housewife	1	3	3	44794	8	1	Known Pos on ART	2				At Health Facility	1	Live Birth-LB	1	Already on ART	1	2020-06-01	1c = TDF/3TC/DTG	3		2022-01-05	Pregnant	2022-07-04	180	6+ months	3	180	180	0	Yes	1	Suppressed	1	2022-07-21	17	197
164	IMPORTA-0412	1	2022-09-06	Asega Philip Poru	Juba Teaching Hospital	1	2022-01-12	17	Joppa	Married Monogamous	2	Housewife	1	3	3	44687	20	2	Known Pos on ART	2	4 or more visits	4	3	At Health Facility	1	Live Birth-LB	1	Already on ART	1	2021-07-12	1c = TDF/3TC/DTG	3		2022-01-12	Pregnant	2022-04-11	89	<3 months	1	90	90	0	Yes	1	Suppressed	1	2022-06-20	70	159
165	IMPORTA-0413	1	2022-09-06	Asega Philip Poru	Juba Teaching Hospital	1	2022-01-14	24	Gudele 2	Married Monogamous	2	Housewife	1	1	2	44800	8	1	Newly tested at ANC	1	4 or more visits	4	3	At Health Facility	1	Live Birth-LB	1	New on ART -- in pregnancy	2	2022-01-14	1c = TDF/3TC/DTG	3		2022-01-14	Pregnant	2022-04-14	90	3-5 months	2	90	90	0	No	2	NA	3	2022-04-29	15	105
55	IMPORTA-0414	1	2022-08-30	Okori John	Nimule Hospital	3	2020-03-19	22	Elegu	Married Monogamous	2	Housewife	1	5	1				Known Pos on ART	2	2 visits	2	2	At Health Facility	1	Live Birth-LB	1	New on ART -- in pregnancy	2		1c = TDF/3TC/DTG	3		2020-03-19	Pregnant	2020-09-18	183	6+ months	3	180	180	0	No	2	NA	3	2020-09-17	-1	182
56	IMPORTA-0415	1	2022-08-30	Okori John	Nimule Hospital	3	2020-03-30	30	Rock City	Married Polygamous	2	Housewife	1		3	44039			Known Pos on ART	2				At Health Facility	1	Live Birth-LB	1	Already on ART	1	2017-11-10	1c = TDF/3TC/DTG	3		2020-03-30	Pregnant	2020-05-30	61	<3 months	1	60	60	0	No	2	NA	3	2020-05-14	-16	45
57	IMPORTA-0416	1	2022-08-30	Okori John	Nimule Hospital	3	2020-03-30	27	Malakia	Married Polygamous	2	Housewife	1	1		44060			Known Pos on ART	2	2 visits	2	2	At Health Facility	1			Already on ART	1	2017-11-14	1c = TDF/3TC/DTG	3		2020-03-09	Pregnant	2020-09-09	184	6+ months	3	180	180	0	No	2	NA	3	2020-09-09	0	184
58	IMPORTA-0417	1	2022-08-31	Okori John	Nimule Hospital	3	2021-07-02	28	Malakia	Married Polygamous	2	Housewife	1	3	3	44554	24	2	Newly tested at ANC	1	4 or more visits	4	3	At Health Facility	1	Neonatal Death-ND	3	New on ART -- in pregnancy	2	2021-07-02	1c = TDF/3TC/DTG	3		2021-07-02	Pregnant	2021-01-03				180	180	0	Yes	1	Suppressed	1	2021-12-30	361	181
59	IMPORTA-0418	1	2022-08-31	Okori John	Nimule Hospital	3	2021-04-26	30	Bibia	Married Monogamous	2	Housewife	1			44435	32	2	Newly tested at ANC	1						Live Birth-LB	1	New on ART -- in pregnancy	2	2021-04-26	1c = TDF/3TC/DTG	3		2021-04-26	Pregnant	2021-10-26	183	6+ months	3	180	180	0	Yes	1	Unsuppressed	2	2021-11-01	6	189
60	IMPORTA-0419	1	2022-08-31	Okori John	Nimule Hospital	3	2021-06-01	28	Elegu	Married Monogamous	2	Housewife	1	2		44515	16	2	Known Pos on ART	2	1 visit	1	1	At Health Facility	1	Live Birth-LB	1	Already on ART	1	2010-01-20	1c = TDF/3TC/DTG	3		2021-03-11	Pregnant	2021-09-22	195	6+ months	3	180	180	0	Yes	1	Suppressed	1	2021-09-22	0	195
61	IMPORTA-0420	1	2022-08-31	Okori John	Nimule Hospital	3	2021-03-29	24	Nimule c	Married Monogamous	2	Housewife	1				20	2	Known Pos on ART	2	4 or more visits	4	3	At Health Facility	1			Already on ART	1	2018-11-15	1c = TDF/3TC/DTG	3		2021-02-17	Pregnant	2021-08-17	181	6+ months	3	180	180	0	Yes	1	Suppressed	1	2021-08-17	0	181
62	IMPORTA-0421	1	2022-08-31	Okori John	Nimule Hospital	3	2021-07-13	27	Mugali			Housewife	1	1			22	2	Known Pos on ART	2				At home	2	Live Birth-LB	1			2018-06-19	1c = TDF/3TC/DTG	3		2021-07-13	Pregnant	2022-01-13	184	6+ months	3	180	180	0	Yes	1	Suppressed	1	2022-01-13	0	184
63	IMPORTA-0422	1	2022-08-31	Okori John	Nimule Hospital	3	2021-03-12	39	Elegu	Married Polygamous	2	Housewife	1		4				Known Pos on ART	2	1 visit	1	1	At Health Facility	1	Live Birth-LB	1	Already on ART	1	2009-01-19	1c = TDF/3TC/DTG	3		2021-03-03	Pregnant	2021-09-03	184	6+ months	3	180	180	0	Yes	1	Suppressed	1	2022-03-02	180	364
64	IMPORTA-0423	1	2022-09-01	Okori John	Nimule Hospital	3	2021-03-15	25	Elegu	Married Monogamous	2	Housewife	1	5	3		22	2	Known Pos on ART	2	2 visits	2	2	At Health Facility	1	Live Birth-LB	1	Already on ART	1	2012-07-20	1c = TDF/3TC/DTG	3		2021-03-17	Pregnant	2021-09-17	184	6+ months	3	180	180	0	Yes	1	Suppressed	1	2021-09-24	7	191
65	IMPORTA-0424	1	2022-09-01	Okori John	Nimule Hospital	3	2021-08-17	27	Elegu	Married Monogamous	2	Housewife	1	5	4				Newly tested at ANC	1	2 visits	2	2	At Health Facility	1	Live Birth-LB	1	New on ART -- in pregnancy	2	2021-08-17	1c = TDF/3TC/DTG	3		2021-08-17	Pregnant	2022-02-17	184	6+ months	3	180	180	0	No	2	NA	3	2022-02-25	8	192
66	IMPORTA-0425	1	2022-09-01	Okori John	Nimule Hospital	3	2021-01-14	28	Malakia			Housewife	1			44340	24	2	Known Pos on ART	2	3 visits	3	3	At Health Facility	1	Live Birth-LB	1	Already on ART	1	2020-08-17	1c = TDF/3TC/DTG	3		2021-01-15	Pregnant	2021-07-15	181	6+ months	3	180	180	0	No	2	NA	3	2021-07-19	4	185
67	IMPORTA-0426	1	2022-09-01	Okori John	Nimule Hospital	3	2021-07-05	29	Elegu	Married Monogamous	2	Housewife	1	3		44572	18	2	Newly tested at ANC	1	4 or more visits	4	3	At Health Facility	1	Live Birth-LB	1	New on ART -- in pregnancy	2	2021-07-05	1c = TDF/3TC/DTG	3		2021-07-05	Pregnant	2022-01-05	184	6+ months	3	180	180	0	No	2	NA	3	2022-01-06	1	185
68	IMPORTA-0427	1	2022-09-01	Okori John	Nimule Hospital	3	2021-02-25	36	Hai Kenisa			Other Uniformed forces (Police, Wildlife, Prisons, Fire Brigade)	2	6	1	44404	18	2	Known Pos on ART	2	4 or more visits	4	3	At Health Facility	1	Still Birth-MSB or FSB	2	Already on ART	1		1c = TDF/3TC/DTG	3		2020-12-23	Pregnant	2021-06-23	182	6+ months	3	180	180	0	No	2	NA	3	2021-06-24	1	183
69	IMPORTA-0428	1	2022-08-31	Okori John	Nimule Hospital	3	2021-06-26	21	Motoyo	Divorced/separated	3	Housewife	1						Known Pos on ART	2	2 visits	2	2	At Health Facility	1	Live Birth-LB	1	Already on ART	1	2019-05-28	1c = TDF/3TC/DTG	3		2020-06-26	Breastfeeding	2020-12-18	175	3-5 months	2	180	180	0	Yes	1	Suppressed	1	2020-12-16	-2	173
70	IMPORTA-0429	1	2022-09-01	Okori John	Nimule Hospital	3	2021-02-12	34	Abila	Widowed	3	Housewife	1		4		20	2	Known Pos on ART	2	2 visits	2	2	At Health Facility	1	Live Birth-LB	1	Already on ART	1	2015-01-05	1c = TDF/3TC/DTG	3		2020-11-18	Breastfeeding	2021-05-18	181	6+ months	3	180	180	0	No	2	NA	3	2021-05-18	0	181
71	IMPORTA-0430	1	2022-09-01	Okori John	Nimule Hospital	3	2021-08-11	33	Motoyo	Divorced/separated	3	Housewife	1	3	3	44533			Known Pos on ART	2	3 visits	3	3	At Health Facility	1	Live Birth-LB	1	Already on ART	1	2019-07-23	1c = TDF/3TC/DTG	3		2021-08-11	Pregnant	2022-04-14	246	6+ months	3	180	180	0	Yes	1	Unsuppressed	2	2022-04-15	1	247
72	IMPORTA-0431	1	2022-09-01	Okori John	Nimule Hospital	3	2021-08-03	28	Malakia	Married Monogamous	2	Business (Man/Women)/trader	2	3	3	44578	18	2	Known Pos on ART	2	1 visit	1	1	At Health Facility	1	Live Birth-LB	1	Already on ART	1	2020-10-23	1c = TDF/3TC/DTG	3		2021-04-23	Pregnant	2021-10-22	182	6+ months	3	180	180	0	Yes	1	Suppressed	1	2021-10-22	0	182
73	IMPORTA-0432	1	2022-08-31	Okori John	Nimule Hospital	3	2021-05-27	28	Abila	Married Polygamous	2	Housewife	1	5			30	2	Known Pos on ART	2	2 visits	2	2	At Health Facility	1	Live Birth-LB	1	Already on ART	1	2018-04-13	1c = TDF/3TC/DTG	3		2021-05-27	Breastfeeding	2021-11-26	183	6+ months	3	180	180	0	Yes				2021-11-26	0	183
74	IMPORTA-0433	1	2022-08-31	Okori John	Nimule Hospital	3	2021-07-16	27	Abila	Widowed	3	Housewife	1			44548	20	2	Newly tested at ANC	1	1 visit	1	1	At Health Facility	1	Live Birth-LB	1	New on ART -- in pregnancy	2	2021-07-16	1c = TDF/3TC/DTG	3		2021-07-16	Pregnant	2022-01-17	185	6+ months	3	180	180	0	No	2	NA	3	2022-01-26	9	194
75	IMPORTA-0434	1	2022-08-31	Okori John	Nimule Hospital	3	2021-01-27	42	Elegu	Widowed	3	Housewife	1	5			11	1	Known Pos on ART	2	1 visit	1	1	At Health Facility	1	Live Birth-LB	1	Already on ART	1	2014-08-13	1c = TDF/3TC/DTG	3		2020-08-06	Pregnant	2021-02-05	183	6+ months	3	180	180	0	Yes	1	Suppressed	1	2021-02-05	0	183
76	IMPORTA-0435	1	2022-09-02	Okori John	Nimule Hospital	3	2021-10-05	26	Rei	Married Monogamous	2	Housewife	1	2	3	44545	21	2	Newly tested at ANC	1						Live Birth-LB	1	New on ART -- in pregnancy	2	2021-10-05	1c = TDF/3TC/DTG	3		2021-10-05	Pregnant	2022-04-05	182	6+ months	3	180	180	0	Yes	1	Suppressed	1	2022-04-06	1	183
77	IMPORTA-0436	1	2022-09-02	Okori John	Nimule Hospital	3	2021-12-06	31	Elegu	Married Polygamous	2	Housewife	1	1	5		25	2	Known Pos on ART	2	1 visit	1	1	At Health Facility	1	Live Birth-LB	1	Already on ART	1	2018-01-04	1c = TDF/3TC/DTG	3		2021-12-01	Breastfeeding	2022-06-01	182	6+ months	3	180	180	0	Yes				2022-06-17	16	198
78	IMPORTA-0437	1	2022-09-02	Okori John	Nimule Hospital	3	2021-03-08	37	Motoyo	Single (never married)	1	Salaried Employee	2	3		44338	28	2	Known Pos on ART	2	3 visits	3	3	At Health Facility	1	Live Birth-LB	1	Already on ART	1	2017-06-19	1c = TDF/3TC/DTG	3		2020-11-30	Pregnant	2021-05-28	179	3-5 months	2	180	180	0	No	2	NA	3	2021-06-11	14	193
79	IMPORTA-0438	1	2022-09-02	Okori John	Nimule Hospital	3	2021-09-07	18	Malakia	Married Polygamous	2	Housewife	1	6	1	44859	14	1	Known Pos on ART	2	4 or more visits	4	3	At Health Facility	1	Live Birth-LB	1	Already on ART	1	2021-07-08	1c = TDF/3TC/DTG	3		2021-07-08	Pregnant	2021-10-27	111	3-5 months	2	90	90	0	No	2	NA	3	2021-10-29	2	113
80	IMPORTA-0439	1	2022-09-02	Okori John	Nimule Hospital	3	2021-10-21	23	Motoyo	Widowed	3	Housewife	1		4	44652	12	1	Newly tested at ANC	1	3 visits	3	3	At Health Facility	1	Live Birth-LB	1	New on ART -- in pregnancy	2	2021-10-21	1c = TDF/3TC/DTG	3		2021-10-21	Pregnant	2022-04-21	182	6+ months	3	180	180	0	No	2	NA	3	2022-04-21	0	182
81	IMPORTA-0440	1	2022-09-02	Okori John	Nimule Hospital	3	2021-10-11	27	Abila	Married Polygamous	2	Housewife	1	3	3		28	2	Newly tested at ANC	1	1 visit	1	1	At Health Facility	1	Live Birth-LB	1	New on ART -- in pregnancy	2	2021-10-11	1c = TDF/3TC/DTG	3		2021-10-11	Pregnant	2022-04-11	182	6+ months	3	180	180	0	No	2	NA	3	2022-04-11	0	182
82	IMPORTA-0441	1	2022-09-02	Okori John	Nimule Hospital	3	2021-10-19	33	Rei	Divorced/separated	3	Housewife	1				25	2	Newly tested at ANC	1	1 visit	1	1	At Health Facility	1			New on ART -- in pregnancy	2	2021-10-19	1c = TDF/3TC/DTG	3		2021-10-19	Breastfeeding	2022-04-19	182	6+ months	3	180	180	0	No	2	NA	3	2022-04-19	0	182
83	IMPORTA-0442	1	2022-09-02	Okori John	Nimule Hospital	3	2021-06-11	28	Motoyo	Married Monogamous	2	Housewife	1	1	2	44418	32	2	Known Pos on ART	2	3 visits	3	3	At Health Facility	1	Live Birth-LB	1	Already on ART	1	2020-11-02	1c = TDF/3TC/DTG	3		2021-06-11	Pregnant	2021-12-10	182	6+ months	3	180	180	0	Yes	1	Suppressed	1	2021-12-13	3	185
84	IMPORTA-0443	1	2022-09-01	Okori John	Nimule Hospital	3	2021-04-29	27	Abila	Married Polygamous	2	Housewife	1		3	44504			Known Pos on ART	2				At Health Facility	1	Live Birth-LB	1	Already on ART	1	2021-02-09	1c = TDF/3TC/DTG	3		2021-08-27	Pregnant	2022-02-27	184	6+ months	3	180	180	0	Yes	1	Suppressed	1	2022-04-27	59	243
85	IMPORTA-0444	1	2022-09-01	Okori John	Nimule Hospital	3	2021-06-14	29	Rei	Married Monogamous	2	Housewife	1	3	3	44554	8	1	Known Pos on ART	2				At Health Facility	1	Live Birth-LB	1	New on ART -- in pregnancy	2	2021-07-17	1c = TDF/3TC/DTG	3		2021-05-01	Pregnant	2021-11-30	213	6+ months	3	180	180	0	Yes	1	Suppressed	1	2021-11-30	0	213
86	IMPORTA-0445	1	2022-08-04	Okori John	Nimule Hospital	3		30	Elegu	Widowed	3	Housewife	1	5					Known Pos on ART	2	2 visits	2	2	At Health Facility	1	Live Birth-LB	1	Already on ART	1	2017-12-07	1c = TDF/3TC/DTG	3		2021-08-03	Breastfeeding	2022-02-03	184	6+ months	3	180	180	0	Yes	1	Suppressed	1	2022-02-04	1	185
87	IMPORTA-0446	1	2022-09-01	Okori John	Nimule Hospital	3	2021-08-09	32	Motoyo	Married Monogamous	2	Housewife	1	4	3	44904	20	2	Known Pos on ART	2	1 visit	1	1	At Health Facility	1	Live Birth-LB	1	Already on ART	1	2019-04-12	1c = TDF/3TC/DTG	3		2021-08-09	Pregnant	2021-11-09	92	3-5 months	2	180	180	0	No	2	NA	3	2021-11-17	8	100
88	IMPORTA-0447	1	2022-09-01	Okori John	Nimule Hospital	3	2021-03-25	23	Elegu	Married Polygamous	2	Housewife	1	1			11	1	Newly tested at ANC	1	2 visits	2	2			Live Birth-LB	1	New on ART -- in pregnancy	2	2021-03-25	1c = TDF/3TC/DTG	3		2021-03-25	Breastfeeding	2021-09-25	184	6+ months	3	180	180	0	No	2	NA	3	2021-09-24	-1	183
89	IMPORTA-0448	1	2022-09-01	Okori John	Nimule Hospital	3	2021-02-09	29	Malakia	Married Monogamous	2	Housewife	1		6		22	2	Known Pos on ART	2	2 visits	2	2	At Health Facility	1	Live Birth-LB	1	Already on ART	1	2014-01-13	1c = TDF/3TC/DTG	3		2021-02-09	Pregnant	2021-08-02	174	3-5 months	2	180	180	0	Yes				2021-08-02	0	174
90	IMPORTA-0449	1	2022-09-01	Okori John	Nimule Hospital	3	2021-07-26	23	Abila	Married Polygamous	2	Unemployed	1	2	3	44548	20	2	Known Pos on ART	2	1 visit	1	1	At Health Facility	1	Live Birth-LB	1	Already on ART	1	2021-01-18	1c = TDF/3TC/DTG	3		2021-07-12	Pregnant	2022-01-12	184	6+ months	3	180	180	0	Yes	1	Suppressed	1	2022-01-27	15	199
91	IMPORTA-0450	1	2022-09-01	Okori John	Nimule Hospital	3	2021-03-17	32	Abila	Single (never married)	1	Housewife	1	1	4	44394			Known Pos on ART	2				At Health Facility	1	Live Birth-LB	1	Already on ART	1	2020-09-03	1c = TDF/3TC/DTG	3		2021-03-17	Pregnant	2021-09-17	184	6+ months	3	180	180	0	Yes	1	Suppressed	1	2022-07-05	291	475
92	IMPORTA-0451	1	2022-09-01	Okori John	Nimule Hospital	3	2021-07-13	26	Motoyo	Single (never married)	1	Housewife	1		1				Known Pos on ART	2	1 visit	1	1	At Health Facility	1	Live Birth-LB	1	Already on ART	1	2020-11-13	1c = TDF/3TC/DTG	3		2021-05-14	Breastfeeding	2021-11-14	184	6+ months	3	180	180	0	Yes	1	Suppressed	1	2021-11-15	1	185
93	IMPORTA-0452	1	2022-09-01	Okori John	Nimule Hospital	3	2021-01-27	35	Malakia	Divorced/separated	3	Housewife	1	3	4		22	2	Newly tested at ANC	1	1 visit	1	1	At Health Facility	1	Live Birth-LB	1	New on ART -- in pregnancy	2	2021-01-27	1c = TDF/3TC/DTG	3		2021-01-27	Breastfeeding	2021-07-27	181	6+ months	3	180	180	0	NA	3	NA	3	2021-07-30	3	184
94	IMPORTA-0453	1	2022-09-01	Okori John	Nimule Hospital	3	2021-08-03	28	Elegu	Married Polygamous	2	Housewife	1	1			18	2	Newly tested at ANC	1	4 or more visits	4	3	At Health Facility	1	Live Birth-LB	1	Already on ART	1	2020-01-27	1c = TDF/3TC/DTG	3		2021-08-04	Pregnant	2022-03-04	212	6+ months	3	180	180	0	Yes	1	Suppressed	1	2022-03-02	-2	210
95	IMPORTA-0454	1	2022-09-02	Okori John	Nimule Hospital	3	2021-12-20	35	Abila	Married Monogamous	2	Housewife	1	3	3	44758	18	2	Known Pos on ART	2				At Health Facility	1	Live Birth-LB	1	Already on ART	1	2020-06-29	1c = TDF/3TC/DTG	3		2020-12-29	Pregnant	2021-06-29	182	6+ months	3	180	180	0	Yes	1	Suppressed	1	2021-06-29	0	182
96	IMPORTA-0455	1	2022-09-01	Okori John	Nimule Hospital	3	2021-07-26	25	Elegu	Married Polygamous	2	Housewife	1	4	4		25	2	Known Pos on ART	2	2 visits	2	2	At Health Facility	1	Live Birth-LB	1	Already on ART	1	2020-01-16	1c = TDF/3TC/DTG	3		2021-04-15	Breastfeeding	2021-10-15	183	6+ months	3	180	180	0	Yes	1	Suppressed	1	2021-10-29	14	197
97	IMPORTA-0456	1	2022-09-01	Okori John	Nimule Hospital	3	2021-02-09	32	Pageri	Divorced/separated	3	Housewife	1	5		44246	38	2	Known Pos on ART	2	1 visit	1	1	At Health Facility	1	Live Birth-LB	1	Already on ART	1	2020-09-09	1c = TDF/3TC/DTG	3		2020-09-09	Pregnant	2021-03-09	181	6+ months	3	180	180	0	Yes	1	Suppressed	1	2021-03-08	-1	180
98	IMPORTA-0457	1	2022-09-01	Okori John	Nimule Hospital	3	2021-04-12	34	Elegu	Single (never married)	1	Housewife	1		3	44465	10	1	Known Pos on ART	2	2 visits	2	2	At Health Facility	1	Live Birth-LB	1	Already on ART	1	2019-02-12	1c = TDF/3TC/DTG	3		2019-02-12	Pregnant	2021-10-15	976	6+ months	3	180	180	0	Yes	1	Suppressed	1	2021-10-06	-9	967
99	IMPORTA-0458	1	2022-09-09	Okori John	Nimule Hospital	3	2021-08-05	31	Abila	Married Monogamous	2	Housewife	1	3	3	44574	25	2	Known Pos on ART	2	2 visits	2	2	At Health Facility	1			Already on ART	1	2020-01-08	1c = TDF/3TC/DTG	3		2021-04-14	Pregnant	2021-10-14	183	6+ months	3	180	180	0	Yes	1	Suppressed	1	2021-10-15	1	184
100	IMPORTA-0459	1	2022-09-01	Okori John	Nimule Hospital	3	2021-04-29	27	Elegu	Married Polygamous	2	Business (Man/Women)/trader	2		3	44447			Newly tested at ANC	1	1 visit	1	1	At Health Facility	1	Live Birth-LB	1	New on ART -- in pregnancy	2	2021-04-29	1c = TDF/3TC/DTG	3		2021-04-29	Pregnant	2021-10-29	183	6+ months	3	180	180	0	NA	3	NA	3	2021-10-29	0	183
101	IMPORTA-0460	1	2022-09-02	Okori John	Nimule Hospital	3	2021-11-01	30	Motoyo	Married Polygamous	2	Housewife	1	1		44708			Known Pos on ART	2	4 or more visits	4	3	At Health Facility	1	Live Birth-LB	1	Already on ART	1	2018-07-24	1c = TDF/3TC/DTG	3		2021-11-01	Pregnant	2022-05-02	182	6+ months	3	180	180	0	Yes	1	Suppressed	1	2022-08-26	116	298
102	IMPORTA-0461	1	2022-09-02	Okori John	Nimule Hospital	3	2021-09-15	22	Malakia	Married Monogamous	2	Housewife	1	2	3	44799	12	1	Known Pos on ART	2	1 visit	1	1	At Health Facility	1	Live Birth-LB	1	Already on ART	1	2018-08-31	1c = TDF/3TC/DTG	3		2021-06-25	Pregnant	2022-01-12	201	6+ months	3	180	180	0	Yes	1	Suppressed	1	2022-01-12	0	201
103	IMPORTA-0462	1	2022-09-02	Okori John	Nimule Hospital	3	2021-12-06	33	Motoyo	Married Polygamous	2	Business (Man/Women)/trader	2	3	3	44733	18	2	Known Pos on ART	2	4 or more visits	4	3	At Health Facility	1	Live Birth-LB	1	Already on ART	1	2016-05-07	1c = TDF/3TC/DTG	3		2021-12-06	Pregnant	2022-06-06	182	6+ months	3	180	180	0	Yes	1	Suppressed	1	2022-06-06	0	182
104	IMPORTA-0463	1	2022-09-02	Okori John	Nimule Hospital	3	2021-12-21	32	Abila	Married Monogamous	2	Housewife	1	3	3	44695	18	2	Known Pos on ART	2	4 or more visits	4	3	At Health Facility	1	Live Birth-LB	1	Already on ART	1	2015-03-16	1c = TDF/3TC/DTG	3		2021-09-22	Pregnant	2022-03-22	181	6+ months	3	180	180	0	Yes	1	Suppressed	1	2022-03-22	0	181
105	IMPORTA-0464	1	2022-09-02	Okori John	Nimule Hospital	3	2021-11-30	34	Malakia	Married Monogamous	2	Housewife	1	3		44756	16	2	Known Pos on ART	2				At Health Facility	1	Live Birth-LB	1	Already on ART	1	2018-01-15	1c = TDF/3TC/DTG	3		2021-11-30	Pregnant	2022-05-30	181	6+ months	3	180	180	0	NA	3	NA	3	2022-05-30	0	181
106	IMPORTA-0465	1	2022-09-02	Okori John	Nimule Hospital	3	2021-05-07	30	Abila	Married Polygamous	2	Housewife	1	3	3	44473			Known Pos on ART	2				At Health Facility	1	Live Birth-LB	1	Already on ART	1	2016-01-14	1c = TDF/3TC/DTG	3		2021-05-07	Pregnant	2021-11-05	182	6+ months	3	180	180	0	Yes	1	Suppressed	1	2021-11-22	17	199
107	IMPORTA-0466	1	2022-09-02	Okori John	Nimule Hospital	3	2021-11-01	26	Elegu			Housewife	1		3	44616	16	2	Known Pos on ART	2	4 or more visits	4	3	At Health Facility	1	Live Birth-LB	1	Already on ART	1	2018-12-18	1c = TDF/3TC/DTG	3		2021-05-06	Pregnant	2022-05-05	364	6+ months	3	180	180	0	Yes	1	Suppressed	1	2022-09-05	184	548
108	IMPORTA-0467	1	2022-09-02	Okori John	Nimule Hospital	3	2021-07-02	28	Malakia	Widowed	3	Housewife	1	4	2	44379			Known Pos on ART	2	2 visits	2	2	At Health Facility	1	Live Birth-LB	1	Already on ART	1	2021-07-02	1c = TDF/3TC/DTG	3		2021-07-02	Breastfeeding	2021-01-03				180	180	0	Yes	1	Suppressed	1	2022-01-03	365	185
109	IMPORTA-0468	1	2022-09-02	Okori John	Nimule Hospital	3	2022-08-26	29	Malakia	Married Monogamous	2	Housewife	1	3	3	44557	18	2	Known Pos on ART	2	4 or more visits	4	3	At Health Facility	1	Live Birth-LB	1	Already on ART	1	2021-07-22	1c = TDF/3TC/DTG	3		2022-01-06	Pregnant	2022-07-06	181	6+ months	3	180	180	0	Yes	1	Suppressed	1	2022-07-06	0	181
110	IMPORTA-0469	1	2022-09-02	Okori John	Nimule Hospital	3	2021-10-25	23	Motoyo	Divorced/separated	3	Housewife	1	5		44603	28	2	Known Pos on ART	2	2 visits	2	2	At Health Facility	1	Live Birth-LB	1	Already on ART	1	2020-12-31	1c = TDF/3TC/DTG	3		2020-09-25	Pregnant	2021-03-25	181	6+ months	3	180	180	0	NA	3	NA	3	2021-03-26	1	182
154	IMPORTA-0470	1	2022-09-02	Arach Maker Arach	Rumbek Hospital	2	2022-01-27	29	Kharil			Housewife	1	6		44764	16	2	Newly tested at ANC	1	2 visits	2	2	At Health Facility	1	Live Birth-LB	1	New on ART -- in pregnancy	2	2022-01-27	1c = TDF/3TC/DTG	3		2022-01-27	Pregnant	2022-07-27	181	6+ months	3	180	184	-4	No	2	NA	3		44769
145	IMPORTA-0472	1	2022-09-02	Arach Maker Arach	Rumbek Hospital	2	2021-11-29	29	Rongo	Single (never married)	1	Housewife	1	5	5		25	2	Known Pos not on ART	2	2 visits	2	2	At Health Facility	1	Live Birth-LB	1	New on ART -- in pregnancy	2	2021-11-29	1c = TDF/3TC/DTG	3		2021-11-29	Breastfeeding	2022-05-29	181	6+ months	3	180	242	-62	No	2	NA	3		44710
146	IMPORTA-0473	1	2022-09-09	Arach Maker Arach	Rumbek Hospital	2	2021-12-07	30	Motor ngap	Married Polygamous	2	Housewife	1	3		44665	21	2	Known Pos on ART	2	2 visits	2	2	At Health Facility	1	Live Birth-LB	1	Already on ART	1	2019-09-26	1c = TDF/3TC/DTG	3		2021-12-07	Pregnant	2022-06-07	182	6+ months	3	180	223	-43	Yes	1	Suppressed	1		44719
	IMPORTA-0474	1	2022-08-29	Sarah Auma	Torit Hospital	2	2019-10-25	35	Adisababa	Married Monogamous	2	Housewife	1	3	3	43845	36	2	Known Pos on ART	2	2 visits	2	2	At Health Facility	1	Live Birth-LB	1	Already on ART	1	2019-10-25	1f = TDF/3TC/EFV	6		2019-10-25	Breastfeeding	2020-04-24	182	6+ months	3	180	180	0	Yes				2020-04-27	3	185
	IMPORTA-0475	1	2022-08-29	Sarah Auma	Torit Hospital	2	2019-10-28	28	Hai Lotuko	Married Monogamous	2	Salaried Employee	2	3	2		25	2	Known Pos on ART	2	2 visits	2	2	At home	2	Live Birth-LB	1	Already on ART	1	2015-10-05	1f = TDF/3TC/EFV	6		2019-10-28	Pregnant	2020-01-28	92	3-5 months	2	90	90	0	Yes				2020-07-28	182	274
	IMPORTA-0476	1	2022-08-29	Sarah Auma	Torit Hospital	2	2019-10-28	29	Hai Engif	Married Polygamous	2	Unemployed	1		3	43905			Known Pos on ART	2	3 visits	3	3	At Health Facility	1	Live Birth-LB	1	Already on ART	1	2018-02-09	1f = TDF/3TC/EFV	6		2019-10-28	Pregnant	2020-01-28	92	3-5 months	2	90	90	0	NA	3	NA	3	2020-01-27	-1	91
	IMPORTA-0477	1	2022-08-29	Sarah Auma	Torit Hospital	2	2019-10-29	36	Askal	Married Polygamous	2	Other Uniformed forces (Police, Wildlife, Prisons, Fire Brigade)	2	3	3				Known Pos on ART	2	3 visits	3	3					Already on ART	1	2019-07-03	1f = TDF/3TC/EFV	6		2019-10-29	Pregnant	2020-01-28	91	3-5 months	2	90	90	0	Yes	1	Suppressed	1	2020-01-08	-20	71
	IMPORTA-0478	1	2022-08-29	Sarah Auma	Torit Hospital	2	2019-11-05	27	Gumbo	Married Monogamous	2	Other Uniformed forces (Police, Wildlife, Prisons, Fire Brigade)	2		3	43892	23	2	Known Pos on ART	2	3 visits	3	3	At Health Facility	1	Live Birth-LB	1	New on ART -- in pregnancy	2	2018-12-27	1f = TDF/3TC/EFV	6		2019-11-05	Pregnant	2019-12-05	30	<3 months	1	30	30	0	NA	3	NA	3	2019-12-06	1	31
	IMPORTA-0479	1	2022-08-30	Sarah Auma	Torit Hospital	2	2019-11-11	30	Hai Lotuko	Married Polygamous	2			3	3	43966	16	2			3 visits	3	3	At Health Facility	1	Live Birth-LB	1	Already on ART	1	2012-03-05	1f = TDF/3TC/EFV	6		2019-11-11	Pregnant	2020-02-12	93	3-5 months	2	90	90	0	Yes	1	Suppressed	1	2020-02-18	6	99
	IMPORTA-0480	1	2022-08-30	Sarah Auma	Torit Hospital	2	2019-11-12	32	Hai Kuku	Married Polygamous	2	Housewife	1		1	43860			Known Pos on ART	2	1 visit	1	1	At Health Facility	1	Live Birth-LB	1			2018-02-05	1f = TDF/3TC/EFV	6		2019-11-12	Breastfeeding	2020-05-20	190	6+ months	3	180	180	0	Yes	1	Suppressed	1	2020-06-03	14	204
	IMPORTA-0481	1	2021-06-15	Sarah Auma	Torit Hospital	2	2019-11-13	29	Engif	Married Polygamous	2	Housewife	1	2	3				Known Pos on ART	2	1 visit	1	1	At home	2			Already on ART	1	2018-08-27	1f = TDF/3TC/EFV	6		2019-11-13	Pregnant	2020-03-13	121	3-5 months	2	90	90	0	NA	3	NA	3	2020-03-13	0	121
	IMPORTA-0482	1	2022-08-30	Sarah Auma	Torit Hospital	2	2019-11-18	35	Hiyala	Married Polygamous	2	Housewife	1	2	2		18	2	Known Pos on ART	2	3 visits	3	3	At Health Facility	1	Live Birth-LB	1			2019-11-18	1c = TDF/3TC/DTG	3		2019-11-18	Pregnant	2019-02-14				90	90	0	Yes	1	Suppressed	1	2020-03-04	384	107
	IMPORTA-0483	1	2022-08-30	Sarah Auma	Torit Hospital	2	2019-11-18	25	Hai Korolon	Single (never married)	1	Unemployed	1	1	3	44027	8	1	Known Pos on ART	2	3 visits	3	3	At Health Facility	1	Neonatal Death-ND	3	Already on ART	1		1f = TDF/3TC/EFV	6		2019-12-18	Pregnant	2020-02-17	61	<3 months	1	60	60	0	Yes	1	Suppressed	1	2019-02-18	-364
	IMPORTA-0484	1	2022-08-30	Sarah Auma	Torit Hospital	2	2020-01-20	33	Askal	Married Polygamous	2	Housewife	1	3	3				Known Pos on ART	2	2 visits	2	2	At Health Facility	1	Live Birth-LB	1	New on ART -- in pregnancy	2	2020-01-20	1c = TDF/3TC/DTG	3		2020-01-20	Pregnant	2020-07-15	177	3-5 months	2	180	180	0	NA	3	NA	3	2020-07-15	0	177
	IMPORTA-0485	1	2020-08-30	Sarah Auma	Torit Hospital	2	2020-01-23	25	llangi	Married Polygamous	2	Housewife	1	2	3	44097	12	1	Newly tested at ANC	1						Live Birth-LB	1	New on ART -- in pregnancy	2		1c = TDF/3TC/DTG	3		2020-01-23	Pregnant	2020-04-22	90	3-5 months	2	90	90	0	NA	3	NA	3	2020-04-24	2	92
	IMPORTA-0486	1	2022-08-30	Sarah Auma	Torit Hospital	2	2020-01-27	29	Askak	Married Monogamous	2	Salaried Employee	2		3		24	2	Known Pos on ART	2	4 or more visits	4	3	At Health Facility	1	Live Birth-LB	1	Already on ART	1	2017-10-13	1f = TDF/3TC/EFV	6		2020-01-27	Pregnant	2020-07-24	179	3-5 months	2	180	180	0	Yes	1	Suppressed	1	2020-07-24	0	179
	IMPORTA-0487	1	2022-08-30	Sarah Auma	Torit Hospital	2	2020-01-30	30	Hai Battery	Married Polygamous	2	Housewife	1	3	3	44025	8	1	Known Pos on ART	2	1 visit	1	1	At Health Facility	1	Live Birth-LB	1	Already on ART	1	2013-05-11	1f = TDF/3TC/EFV	6		2020-01-30	Pregnant	2020-07-29	181	6+ months	3	180	180	0	Yes	1	Suppressed	1	2020-07-28	-1	180
	IMPORTA-0488	1	2022-08-31	Sarah Auma	Torit Hospital	2	2020-01-31	28	Morwami lmoti	Married Polygamous	2	Housewife	1	3	3	44070	12	1	Known Pos on ART	2	4 or more visits	4	3	At Health Facility	1	Still Birth-MSB or FSB	2	New on ART -- in pregnancy	2	2020-01-31	1c = TDF/3TC/DTG	3		2020-01-31	Breastfeeding	2020-04-30	90	3-5 months	2	90	90	0	NA	3	NA	3	2020-05-12	12	102
	IMPORTA-0489	1	2022-08-30	Sarah Auma	Torit Hospital	2	2020-02-06	33	Hai Battery	Married Monogamous	2	Housewife	1		3	44027	20	2	Newly tested at ANC	1	3 visits	3	3	At Health Facility	1	Live Birth-LB	1	Already on ART	1	2016-06-22	1f = TDF/3TC/EFV	6		2020-02-06	Breastfeeding	2020-08-05	181	6+ months	3	180	180	0	Yes	1	Suppressed	1	2020-09-04	30	211
	IMPORTA-0490	1	2022-09-02	Sarah Auma	Torit Hospital	2	2020-02-24	33	Askal	Married Polygamous	2	Housewife	1	2	2		28	2	Newly tested at ANC	1	1 visit	1	1	At home	2	Live Birth-LB	1	New on ART -- postpartum	2		1c = TDF/3TC/DTG	3		2020-02-24	Breastfeeding	2020-08-24	182	6+ months	3	180	180	0	Yes	1	Suppressed	1	2020-04-24	-122	60
	IMPORTA-0491	1	2022-09-02	Sarah Auma	Torit Hospital	2	2020-03-20	34	Hai Melakie	Married Monogamous	2	Housewife	1	3	3	44154	14	1	Known Pos on ART	2	3 visits	3	3	At Health Facility	1	Live Birth-LB	1	Already on ART	1	2012-10-02	1f = TDF/3TC/EFV	6		2020-03-20	Pregnant	2020-07-17	119	3-5 months	2	180	180	0	Yes	1	Suppressed	1	2020-08-12	26	145
	IMPORTA-0492	1	2022-08-31	Sarah Auma	Torit Hospital	2	2020-04-11	38	Hai Longute	Married Monogamous	2	Housewife	1	3	3	44007	8	1	Known Pos on ART	2	4 or more visits	4	3	At Health Facility	1	Live Birth-LB	1	Already on ART	1	2018-10-09	1f = TDF/3TC/EFV	6		2020-04-01	Pregnant	2020-10-01	183	6+ months	3	180	180	0	Yes	1	Suppressed	1	2020-10-07	6	189
	IMPORTA-0493	1	2022-09-01	Sarah Auma	Torit Hospital	2	2020-04-30	30	Hai Kuku	Married Polygamous	2	Housewife	1	3	3	44058	24	2	Known Pos on ART	2	4 or more visits	4	3	At Health Facility	1	Live Birth-LB	1	Already on ART	1	2019-12-20	1f = TDF/3TC/EFV	6		2020-04-30	Pregnant	2020-10-29	182	6+ months	3	180	180	0	Yes	1	Suppressed	1	2020-12-21	53	235
	IMPORTA-0494	1	2022-08-30	Sarah Auma	Torit Hospital	2	2020-04-30	30	Gumbo	Married Polygamous	2	Housewife	1	3	3	44027	20	2	Known Pos on ART	2	1 visit	1	1	At Health Facility	1	Live Birth-LB	1	Already on ART	1	2016-04-12	1c = TDF/3TC/DTG	3		2020-02-12	Pregnant	2020-08-05	175	3-5 months	2	180	180	0	NA	3	NA	3	2021-01-04	152	327
	IMPORTA-0495	1	2022-08-30	Sarah Auma	Torit Hospital	2	2020-05-05	27	Hai Battery	Married Monogamous	2	Housewife	1	3	3	43978			Known Pos on ART	2	1 visit	1	1					New on ART -- in pregnancy	2		1c = TDF/3TC/DTG	3		2020-05-05	Pregnant	2020-11-04	183	6+ months	3	180	180	0	NA	3	NA	3	2020-11-04	0	183
	IMPORTA-0496	1	2022-08-30	Sarah Auma	Torit Hospital	2	2020-05-18	32	Hai Koroton	Married Monogamous	2	Housewife	1	3	3	44088	36	2	Known Pos on ART	2				At Health Facility	1	Live Birth-LB	1	New on ART -- in pregnancy	2	2020-05-18	1c = TDF/3TC/DTG	3		2020-05-21	Pregnant	2020-11-18	181	6+ months	3	180	180	0	Yes	1	Suppressed	1	2021-11-18	365	546
	IMPORTA-0497	1	2022-09-30	Sarah Auma	Torit Hospital	2	2020-05-18	23	Askal	Married Polygamous	2	Housewife	1	1	1	44195			Newly tested at ANC	1	1 visit	1	1	At Health Facility	1	Live Birth-LB	1	New on ART -- in pregnancy	2	2020-05-18	1c = TDF/3TC/DTG	3		2020-05-18	Pregnant	2020-08-17	91	3-5 months	2	90	90	0	NA	3	NA	3	2020-08-25	8	99
	IMPORTA-0498	1	2022-08-30	Sarah Auma	Torit Hospital	2	2020-05-28	25	Hai Battery	Married Polygamous	2	Housewife	1	2	3	44079	20	2	Known Pos on ART	2	1 visit	1	1	At Health Facility	1	Live Birth-LB	1	Already on ART	1		1f = TDF/3TC/EFV	6		2020-08-14	Pregnant	2021-02-12	182	6+ months	3	180	180	0	Yes	1	Suppressed	1	2021-02-14	2	184
	IMPORTA-0499	1	2022-08-31	Sarah Auma	Torit Hospital	2	2020-05-28	21	Hai Kuku	Married Monogamous	2	Housewife	1	1	3		32	2	Breastfeeding	1	4 or more visits	4	3	At Health Facility	1	Live Birth-LB	1				1f = TDF/3TC/EFV	6		2021-02-22	Breastfeeding	2021-11-19	270	6+ months	3	180	180	0	Yes	1	Suppressed	1	2021-11-19	0	270
	IMPORTA-0500	1	2022-08-30	Sarah Auma	Torit Hospital	2	2020-07-16	30	Hai Kuku	Single (never married)	1	Housewife	1		3	44180	12	1	Known Pos on ART	2	4 or more visits	4	3	At Health Facility	1	Live Birth-LB	1	New on ART -- postpartum	2	2016-02-10	1f = TDF/3TC/EFV	6		2020-10-28	Pregnant	2021-04-22	176	3-5 months	2	180	180	0	NA	3	NA	3	2021-03-24	-29	147
	IMPORTA-0501	1	2022-08-30	Sarah Auma	Torit Hospital	2	2020-08-07	24	Dar-Salam	Married Polygamous	2	Salaried Employee	2		3	44154	20	2	Known Pos on ART	2	4 or more visits	4	3			Live Birth-LB	1	Already on ART	1	2014-08-31	1f = TDF/3TC/EFV	6		2020-09-15	Pregnant	2021-03-12	178	3-5 months	2	180	180	0	Yes	1	Suppressed	1	2021-03-16	4	182
	IMPORTA-0502	1	2022-08-30	Sarah Auma	Torit Hospital	2	2020-08-21	21	Potopoto	Married Polygamous	2	Housewife	1	2	3	44159	18	2	Known Pos on ART	2	4 or more visits	4	3	At Health Facility	1	Live Birth-LB	1	Already on ART	1	2016-06-22	1f = TDF/3TC/EFV	6		2020-03-14	Pregnant	2020-09-14	184	6+ months	3	180	180	0	Yes	1	Suppressed	1	2020-09-11	-3	181
	IMPORTA-0503	1	2022-08-30	Sarah Auma	Torit Hospital	2	2020-09-02	20	Langairo	Married Polygamous	2	Housewife	1	3	2	44270	5	1	Newly tested at ANC	1	4 or more visits	4	3	At Health Facility	1	Live Birth-LB	1	New on ART -- in pregnancy	2	2020-09-02	1c = TDF/3TC/DTG	3		2020-09-02	Pregnant	2021-03-01	180	6+ months	3	180	180	0	NA	3	NA	3	2021-03-05	4	184
	IMPORTA-0504	1	2022-08-31	Sarah Auma	Torit Hospital	2	2020-09-14	35		Single (never married)	1	Farming	2	2	2		38	2	Breastfeeding	1	1 visit	1	1	At home	2	Live Birth-LB	1	New on ART -- in pregnancy	2	2020-09-14	1c = TDF/3TC/DTG	3		2020-09-14	Breastfeeding	2021-03-10	177	3-5 months	2	180	180	0	NA	3	NA	3	2021-03-10	0	177
	IMPORTA-0505	1	2022-08-31	Sarah Auma	Torit Hospital	2	2020-10-07	19	Moti	Married Polygamous	2	Housewife	1	1	2	44267	16	2	Known Pos on ART	2	4 or more visits	4	3	At Health Facility	1	Live Birth-LB	1	Already on ART	1	2020-01-31	1c = TDF/3TC/DTG	3		2020-10-07	Pregnant	2020-11-09	33	<3 months	1	30	30	0	Yes	1	Suppressed	1	2020-11-11	2	35
	IMPORTA-0506	1	2022-08-31	Sarah Auma	Torit Hospital	2	2020-10-19	29	Hai Battery	Married Monogamous	2	Housewife	1	2	3	44291	18	2	Known Pos on ART	2	4 or more visits	4	3	At Health Facility	1	Neonatal Death-ND	3	Already on ART	1	2019-05-02	1c = TDF/3TC/DTG	3		2020-11-18	Pregnant	2021-05-17	180	6+ months	3	180	180	0	Yes	1	Suppressed	1	2021-05-06	-11	169
	IMPORTA-0507	1	2022-08-31	Sarah Auma	Torit Hospital	2	2020-11-04	22	Naivasa	Married Polygamous	2	Housewife	1		1	44286	9	1	Newly tested at ANC	1	4 or more visits	4	3	At Health Facility	1	Neonatal Death-ND	3	New on ART -- postpartum	2	2020-11-04	1c = TDF/3TC/DTG	3		2020-11-04	Pregnant	2021-05-30	207	6+ months	3	180	180	0	Yes	1	Suppressed	1	2021-05-28	-2	205
	IMPORTA-0508	1	2022-08-31	Sarah Auma	Torit Hospital	2	2020-11-30	35	Hai Neem	Married Polygamous	2	Housewife	1	3	3	44346	9	1	Known Pos on ART	2	4 or more visits	4	3	At home	2	Live Birth-LB	1	Already on ART	1		1f = TDF/3TC/EFV	6		2020-11-30	Pregnant	2021-10-05	309	6+ months	3	360	360	0	Yes	1	Suppressed	1	2021-10-21	16	325
	IMPORTA-0509	1	2022-08-31	Sarah Auma	Torit Hospital	2		30	Gumbo	Married Polygamous	2	Housewife	1		3		25	2	Breastfeeding	1				At home	2	Live Birth-LB	1	New on ART -- postpartum	2	2020-12-07	1c = TDF/3TC/DTG	3		2020-12-07	Breastfeeding	2021-06-07	182	6+ months	3	180	180	0	NA	3	NA	3	2021-06-09	2	184
	IMPORTA-0510	1	2020-11-08	Sarah Auma	Torit Hospital	2	2020-12-08	30		Married Monogamous	2	Housewife	1	3	3	44269			Breastfeeding	1	1 visit	1	1	At Health Facility	1	Live Birth-LB	1	Already on ART	1	2014-09-09	1f = TDF/3TC/EFV	6		2021-02-17	Pregnant	2021-08-16	180	6+ months	3	180	180	0	NA	3	NA	3	2021-08-18	2	182
	IMPORTA-0511	1	2022-08-31	Sarah Auma	Torit Hospital	2	2020-12-11	21	Hai Police	Married Monogamous	2	Housewife	1		3	44337	16	2	Newly tested at ANC	1	1 visit	1	1	At Health Facility	1	Live Birth-LB	1	New on ART -- in pregnancy	2	2020-12-04	1c = TDF/3TC/DTG	3		2020-12-04	Pregnant	2021-06-03	181	6+ months	3	180	180	0	NA	3	NA	3	2021-06-03	0	181
	IMPORTA-0512	1	2022-08-31	Sarah Auma	Torit Hospital	2	2021-01-04	38	Pototopo	Married Monogamous	2	Housewife	1	3	2	44414	8	1	Known Pos on ART	2	1 visit	1	1	At Health Facility	1	Live Birth-LB	1	Already on ART	1	2018-09-29	1f = TDF/3TC/EFV	6		2021-06-21	Pregnant	2021-12-02	164	3-5 months	2	180	180	0	NA	3	NA	3	2021-11-29	-3	161
	IMPORTA-0513	1	2022-08-31	Sarah Auma	Torit Hospital	2	2021-01-11	21	Inkas	Married Polygamous	2	Housewife	1	2	3	44388	12	1	Known Pos on ART	2	1 visit	1	1	At Health Facility	1	Live Birth-LB	1	Already on ART	1		1f = TDF/3TC/EFV	6		2021-01-11	Pregnant	2021-07-08	178	3-5 months	2	180	180	0	Yes	1	Suppressed	1	2021-07-15	7	185
	IMPORTA-0514	1	2022-08-31	Sarah Auma	Torit Hospital	2	2021-01-15	25	Limokong	Married Polygamous	2	Housewife	1	3	3		8	1	Breastfeeding	1	2 visits	2	2	At home	2	Live Birth-LB	1				1c = TDF/3TC/DTG	3		2021-01-15	Breastfeeding	2021-07-17	183	6+ months	3	180	180	0	NA	3	NA	3	2021-07-20	3	186
	IMPORTA-0515	1	2022-08-31	Sarah Auma	Torit Hospital	2	2021-03-04	16	Hai Naivasa	Married Monogamous	2	Housewife	1	1	1	44401			Known Pos on ART	2	4 or more visits	4	3	At Health Facility	1	Live Birth-LB	1	Already on ART	1	2020-02-07	1c = TDF/3TC/DTG	3		2021-05-25	Pregnant	2021-11-24	183	6+ months	3	180	180	0	NA	3	NA	3	2021-11-24	0	183
	IMPORTA-0516	1	2022-08-31	Sarah Auma	Torit Hospital	2	2021-03-18	28	Uluhun	Married Polygamous	2	Housewife	1	2	3	44349	28	2	Known Pos not on ART	2	1 visit	1	1	At Health Facility	1	Live Birth-LB	1	Already on ART	1	2018-08-23	1f = TDF/3TC/EFV	6		2021-03-18	Pregnant	2021-09-09	175	3-5 months	2	180	180	0	NA	3	NA	3	2021-09-09	0	175
	IMPORTA-0517	1	2022-08-31	Sarah Auma	Torit Hospital	2	2021-03-24	24	Angawuro	Married Polygamous	2	Salaried Employee	2	1	1	44375			Newly tested at ANC	1				At Health Facility	1			New on ART -- in pregnancy	2		1c = TDF/3TC/DTG	3		2021-03-24	Pregnant	2021-09-23	183	6+ months	3	180	180	0	Yes	1	Suppressed	1	2021-09-23	0	183
	IMPORTA-0518	1	2022-08-31	Sarah Auma	Torit Hospital	2	2021-04-16	29	Hai Koroton	Married Monogamous	2	Housewife	1	1	2	44422	32	2	Known Pos on ART	2	4 or more visits	4	3	At Health Facility	1	Live Birth-LB	1	Already on ART	1	2018-03-13	1f = TDF/3TC/EFV	6		2021-04-16	Pregnant	2021-10-15	182	6+ months	3	180	180	0	Yes	1	Suppressed	1	2021-10-14	-1	181
	IMPORTA-0519	1	2022-08-31	Sarah Auma	Torit Hospital	2	2021-05-04	21	Hai battery	Married Monogamous	2	Housewife	1	1	2	44390	24	2	Newly tested at ANC	1	1 visit	1	1	At Health Facility	1	Live Birth-LB	1	New on ART -- in pregnancy	2	2021-05-05	1c = TDF/3TC/DTG	3		2021-05-04	Pregnant	2021-08-03	91	3-5 months	2	90	90	0	NA	3	NA	3	2021-08-09	6	97
	IMPORTA-0520	1	2022-08-31	Sarah Auma	Torit Hospital	2	2021-05-17	23	Shrikat	Married Polygamous	2	Housewife	1	2	3	44570	2	1	Newly tested at ANC	1	4 or more visits	4	3	At Health Facility	1	Live Birth-LB	1	New on ART -- in pregnancy	2	2021-05-12	1c = TDF/3TC/DTG	3		2021-05-17	Pregnant	2021-11-17	184	6+ months	3	180	180	0	NA	3	NA	3	2021-11-24	7	191
	IMPORTA-0521	1	2022-08-31	Sarah Auma	Torit Hospital	2	2021-06-14	20	Torit State Hospital	Married Polygamous	2	Other Uniformed forces (Police, Wildlife, Prisons, Fire Brigade)	2		3	44319	9	1	Breastfeeding	1	1 visit	1	1	At home	2	Live Birth-LB	1	Already on ART	1	2019-06-11	1f = TDF/3TC/EFV	6		2021-10-19	Breastfeeding	2022-04-19	182	6+ months	3	180	180	0	Yes	1	Suppressed	1	2022-04-19	0	182
	IMPORTA-0522	1	2022-08-31	Sarah Auma	Torit Hospital	2	2021-06-15	29	Gumbo	Married Polygamous	2	Housewife	1		3	44508	12	1	Breastfeeding	1	4 or more visits	4	3	At Health Facility	1	Live Birth-LB	1	New on ART -- postpartum	2	2021-06-15	1c = TDF/3TC/DTG	3		2021-06-15	Breastfeeding	2021-12-14	182	6+ months	3	180	180	0	Yes	1	Suppressed	1	2022-01-13	30	212
	IMPORTA-0523	1	2022-08-31	Sarah Auma	Torit Hospital	2	2021-07-28	26		Married Polygamous	2	Housewife	1	2	2				Breastfeeding	1	1 visit	1	1	At Health Facility	1	Live Birth-LB	1	Already on ART	1	2019-06-19	1f = TDF/3TC/EFV	6		2021-07-28	Pregnant	2022-01-27	183	6+ months	3	180	180	0	NA	3	NA	3	2022-01-27	0	183
	IMPORTA-0524	1	2022-09-01	Sarah Auma	Torit Hospital	2	2021-08-05	26	Hai Matara	Married Polygamous	2	Housewife	1	2	3	44541			Known Pos on ART	2	1 visit	1	1	At Health Facility	1	Live Birth-LB	1	Already on ART	1	2015-11-23	1f = TDF/3TC/EFV	6		2021-08-03	Pregnant	2022-02-01	182	6+ months	3	180	180	0	NA	3	NA	3	2021-11-09	-84	98
	IMPORTA-0525	1	2022-09-01	Sarah Auma	Torit Hospital	2	2021-08-06	30	Hai lotuko	Married Monogamous	2	Housewife	1	1	2	44416	20	2	Newly tested at ANC	1	4 or more visits	4	3	At Health Facility	1	Live Birth-LB	1	New on ART -- in pregnancy	2	2021-08-06	1c = TDF/3TC/DTG	3		2021-08-06	Pregnant	2021-11-05	91	3-5 months	2	90	90	0	NA	3	NA	3	2021-11-05	0	91
	IMPORTA-0526	1	2022-08-31	Sarah Auma	Torit Hospital	2	2021-08-10	22	Inkas	Married Monogamous	2	Housewife	1	1	1	44409			Breastfeeding	1	2 visits	2	2	At Health Facility	1						1c = TDF/3TC/DTG	3		2021-08-20	Breastfeeding	2021-11-18	90	3-5 months	2	90	90	0	NA	3	NA	3	2021-11-18	0	90
	IMPORTA-0527	1	2022-08-31	Sarah Auma	Torit Hospital	2	2021-08-10	19	Hai Shrikat	Married Polygamous	2	Housewife	1	1	2	44492	28	2	Known Pos on ART	2	4 or more visits	4	3	At Health Facility	1	Live Birth-LB	1	Already on ART	1	2019-09-12	1f = TDF/3TC/EFV	6		2021-08-10	Pregnant	2022-02-08	182	6+ months	3	180	180	0	Yes	1	Suppressed	1	2022-08-08	181	363
	IMPORTA-0528	1	2022-08-31	Sarah Auma	Torit Hospital	2	2021-08-23	32	Hai Police	Married Monogamous	2	Housewife	1	3	3	44590	18	2	Known Pos on ART	2	4 or more visits	4	3	At Health Facility	1	Live Birth-LB	1	Already on ART	1	2018-06-21	1f = TDF/3TC/EFV	6		2021-10-01	Pregnant	2022-04-01	182	6+ months	3	180	180	0	NA	3	NA	3	2022-04-01	0	182
	IMPORTA-0529	1	2022-09-01	Sarah Auma	Torit Hospital	2	2021-08-24	20	Hai Police	Married Polygamous	2	Housewife	1	1	2		18	2	Breastfeeding	1	4 or more visits	4	3	At Health Facility	1	Live Birth-LB	1	Already on ART	1	2015-09-09	1f = TDF/3TC/EFV	6		2021-08-08	Breastfeeding	2022-04-11	246	6+ months	3	180	180	0	Yes	1	Suppressed	1	2022-04-12	1	247
	IMPORTA-0530	1	2022-09-01	Sarah Auma	Torit Hospital	2	2021-09-20	32	Hai Gumbo	Married Polygamous	2	Housewife	1	3	3	44585	24	2	Newly tested at ANC	1	4 or more visits	4	3	At Health Facility	1	Live Birth-LB	1	New on ART -- in pregnancy	2	2021-09-20	1c = TDF/3TC/DTG	3		2021-09-20	Pregnant	2021-12-18	89	<3 months	1	90	90	0	NA	3	NA	3	2021-12-17	-1	88
	IMPORTA-0531	1	2022-09-01	Sarah Auma	Torit Hospital	2	2021-09-28	23	Hai Malakia	Married Monogamous	2	Housewife	1		3	44571	24	2	Known Pos on ART	2	1 visit	1	1	At Health Facility	1	Live Birth-LB	1	Already on ART	1	2020-01-21	1c = TDF/3TC/DTG	3		2022-01-13	Pregnant	2022-07-13	181	6+ months	3	180	180	0	Yes	1	Suppressed	1	2022-07-13	0	181
	IMPORTA-0532	1	2022-09-01	Sarah Auma	Torit Hospital	2	2021-09-29	25	Hai Malakia	Married Monogamous	2	Housewife	1	3	3	44549	28	2	Known Pos on ART	2	1 visit	1	1	At Health Facility	1	Live Birth-LB	1	Already on ART	1	2015-06-19	1f = TDF/3TC/EFV	6		2021-10-27	Breastfeeding	2022-04-26	181	6+ months	3	180	180	0					2022-04-26	0	181
	IMPORTA-0533	1	2022-09-01	Sarah Auma	Torit Hospital	2	2021-09-30	30	Hai Malakia	Married Polygamous	2	Housewife	1	3	3	44668	8	1	Known Pos on ART	2	1 visit	1	1	At Health Facility	1	Live Birth-LB	1	Already on ART	1	2015-05-19	1f = TDF/3TC/EFV	6		2021-09-15	Pregnant	2022-03-16	182	6+ months	3	180	180	0	Yes	1	Suppressed	1	2022-03-16	0	182
	IMPORTA-0534	1	2022-09-01	Sarah Auma	Torit Hospital	2	2021-10-01	32	Hai Malakia	Married Polygamous	2	Housewife	1	3	3	44551	20	2	Known Pos on ART	2	4 or more visits	4	3	At Health Facility	1	Live Birth-LB	1	Already on ART	1	2018-06-12	1f = TDF/3TC/EFV	6		2021-12-13	Pregnant	2022-06-10	179	3-5 months	2	180	180	0	NA	3	NA	3	2022-04-06	-65	114
	IMPORTA-0535	1	2022-09-01	Sarah Auma	Torit Hospital	2	2021-10-22	30	Hai Battery	Married Polygamous	2	Housewife	1	3	3	44703	12	1	Known Pos on ART	2	4 or more visits	4	3	At Health Facility	1	Live Birth-LB	1	Already on ART	1	2015-09-09	1f = TDF/3TC/EFV	6		2021-10-14	Pregnant	2022-04-13	181	6+ months	3	180	180	0	NA	3	NA	3	2022-04-13	0	181
	IMPORTA-0537	1	2022-09-01	Sarah Auma	Torit Hospital	2	2021-11-02	24	Hai Mission	Married Polygamous	2	Housewife	1	3	3	44727	8	1	Known Pos on ART	2	4 or more visits	4	3	At Health Facility	1	Live Birth-LB	1	Already on ART	1	2018-09-03	1f = TDF/3TC/EFV	6		2021-07-05	Pregnant	2022-01-04	183	6+ months	3	180	180	0	Yes	1	Suppressed	1	2022-01-04	0	183
	IMPORTA-0538	1	2022-09-01	Sarah Auma	Torit Hospital	2	2021-11-04	20	Hai Battery	Married Polygamous	2	Housewife	1	1	3	44740	28	2	Known Pos on ART	2	3 visits	3	3	At Health Facility	1			Already on ART	1		1c = TDF/3TC/DTG	3		2021-09-17	Pregnant	2022-03-17	181	6+ months	3	180	180	0	Yes	1	Suppressed	1	2022-03-17	0	181
	IMPORTA-0539	1	2021-09-01	Sarah Auma	Torit Hospital	2	2021-11-15	26	Hai Battery	Single (never married)	1	Business (Man/Women)/trader	2	1	2	44685	16	2	Known Pos on ART	2	1 visit	1	1	At Health Facility	1	Live Birth-LB	1	Already on ART	1	2021-05-25	1c = TDF/3TC/DTG	3		2021-11-26	Pregnant	2022-05-25	180	6+ months	3	180	180	0	NA	3	NA	3	2022-05-25	0	180
	IMPORTA-0540	1	2022-08-31	Sarah Auma	Torit Hospital	2		38	Murwari	Married Monogamous	2	Housewife	1	3	3	44309	16	2	Known Pos on ART	2	1 visit	1	1	At home	2	Live Birth-LB	1	Already on ART	1	2017-01-25	1f = TDF/3TC/EFV	6		2020-11-16	Pregnant	2022-05-03	533	6+ months	3	180	180	0	Yes	1	Suppressed	1	2022-02-22	-70	463
	IMPORTA-0541	1	2022-09-01	Sarah Auma	Torit Hospital	2	2021-11-16	38	Morwari	Married Monogamous	2	Housewife	1	3	3	44673	16	2	Known Pos on ART	2	3 visits	3	3	At Health Facility	1	Live Birth-LB	1	Already on ART	1	2017-01-23	1f = TDF/3TC/EFV	6		2021-10-26	Pregnant	2022-04-25	181	6+ months	3	180	180	0	Yes	1	Suppressed	1	2022-04-26	1	182
	IMPORTA-0543	1	2022-09-01	Sarah Auma	Torit Hospital	2		40	Enyit	Married Polygamous	2	Housewife	1	3	3				Known Pos on ART	2	3 visits	3	3	At Health Facility	1	Live Birth-LB	1	Already on ART	1	2015-04-24	1f = TDF/3TC/EFV	6		2022-01-20	Pregnant	2022-06-10	141	3-5 months	2	180	180	0	NA	3	NA	3	2022-06-10	0	141
	IMPORTA-0544	1	2022-09-01	Sarah Auma	Torit Hospital	2		31	Hai Battery	Married Polygamous	2	Housewife	1	3	3	44685	20	2	Known Pos on ART	2	1 visit	1	1	At Health Facility	1	Live Birth-LB	1	Already on ART	1	2013-05-06	1f = TDF/3TC/EFV	6		2021-11-18	Pregnant	2022-05-17	180	6+ months	3	180	180	0	NA	3	NA	3	2022-05-17	0	180
	IMPORTA-0545	1	2022-09-01	Sarah Auma	Torit Hospital	2	2021-12-16	29	Hai Longute	Married Monogamous	2	Housewife	1		3	44635	24	2	Known Pos on ART	2	3 visits	3	3	At Health Facility	1	Live Birth-LB	1	Already on ART	1	2017-10-13	1f = TDF/3TC/EFV	6		2022-12-16	Pregnant	2022-07-21				180	180	0	Yes	1	Suppressed	1	2022-06-21	-30
	IMPORTA-0546	1	2022-08-31	Sarah Auma	Torit Hospital	2		21	Camp 15	Married Polygamous	2	Housewife	1		3		32	2	Known Pos on ART	2	4 or more visits	4	3	At Health Facility	1	Live Birth-LB	1	Already on ART	1	2019-10-24	1f = TDF/3TC/EFV	6		2022-02-07	Pregnant	2021-08-08				180	180	0	Yes	1	Suppressed	1	2022-08-08	365	182
	IMPORTA-0547	1	2022-09-01	Sarah Auma	Torit Hospital	2	2022-01-18	22	Ilangi	Married Polygamous	2	Housewife	1	1	2	44623	32	2	Known Pos on ART	2	3 visits	3	3	At Health Facility	1	Live Birth-LB	1	Already on ART	1	2022-01-18	1c = TDF/3TC/DTG	3		2022-01-18	Pregnant	2022-07-18	181	6+ months	3	180	180	0	NA	3	NA	3	2022-07-18	0	181
	IMPORTA-0548	1	2022-09-01	Sarah Auma	Torit Hospital	2	2022-01-18	25	Inkas	Married Monogamous	2	Housewife	1	3	3	44637	28	2	Known Pos on ART	2	3 visits	3	3	At Health Facility	1	Live Birth-LB	1	Already on ART	1		1f = TDF/3TC/EFV	6		2022-01-18	Pregnant	2022-06-16	149	3-5 months	2	180	180	0					2022-06-16	0	149
	IMPORTA-0549	1	2020-08-30	Sarah Auma	Torit Hospital	2	2022-02-12	31	Hai !otumo	Married Polygamous	2	Housewife	1	3	3	44053	24	2	Known Pos on ART	2	4 or more visits	4	3	At Health Facility	1	Live Birth-LB	1	Already on ART	1	2015-09-07	1f = TDF/3TC/EFV	6		2020-02-12	Pregnant	2020-05-13	91	3-5 months	2	90	90	0	Yes	1	Suppressed	1	2020-05-13	0	91
	IMPORTA-0551	1	2022-09-01	Sarah Auma	Torit Hospital	2	2022-02-01	25	Naivasa	Married Monogamous	2	Housewife	1	1	3	44755			Newly tested at ANC	1	4 or more visits	4	3	At Health Facility	1	Live Birth-LB	1	New on ART -- in pregnancy	2	2022-02-01	1c = TDF/3TC/DTG	3		2022-02-01	Pregnant	2022-07-01	150	3-5 months	2	180	180	0	NA	3	NA	3	2022-07-01	0	150
	IMPORTA-0552	1	2022-08-31	Amoko Denis	Kator PHCC	1	2019-10-24	28	Kator PHCC	Married Monogamous	2	Housewife	1	3	3		24	2	Newly tested at ANC	1	3 visits	3	3	At Health Facility	1	Live Birth-LB	1	New on ART -- in pregnancy	2	2019-10-29	1c = TDF/3TC/DTG	3		2019-10-29	Pregnant	2020-04-27	181	6+ months	3	180	180	0					2020-04-21	-6	175
2	IMPORTA-0553	1	2022-06-19	Amoko Denis	Kator PHCC	1	2019-11-26	29	Sherikat	Married Monogamous	2	Housewife	1	2	3		24	2	Newly tested at ANC	1	1 visit	1	1	At Health Facility	1			Already on ART	1		1c = TDF/3TC/DTG	3		2019-11-26	Pregnant	2020-02-21	87	<3 months	1	90	90	0					2020-02-26	5	92
	IMPORTA-0554	1	2022-08-19	Amoko Denis	Kator PHCC	1	2019-11-07	27	Sherikat								26	2	Newly tested at ANC	1	1 visit	1	1					New on ART -- in pregnancy	2	2019-11-07	1c = TDF/3TC/DTG	3		2019-11-07	Pregnant	2020-02-05	90	3-5 months	2	90	90	0	NA	3	NA	3	2020-02-03	-2	88
	IMPORTA-0555	1	2022-08-31	Amoko Denis	Kator PHCC	1	2019-11-07	20	Gumbo	Married Monogamous	2	Housewife	1		3	43922			Newly tested at ANC	1				At Health Facility	1	Live Birth-LB	1	New on ART -- in pregnancy	2	2019-11-07	1c = TDF/3TC/DTG	3		2019-11-12	Pregnant	2020-02-10	90	3-5 months	2	90	90	0	NA	3	NA	3	2020-02-20	10	100
	IMPORTA-0556	1	2022-08-31	Amoko Denis	Kator PHCC	1	2019-11-26	30	Sherikat	Married Monogamous	2	Housewife	1	3	3		28	2	Newly tested at ANC	1				At Health Facility	1	Live Birth-LB	1	New on ART -- in pregnancy	2	2019-11-26	1c = TDF/3TC/DTG	3		2019-11-26	Pregnant	2019-02-26				90	90	0					2020-03-10	378	105
	IMPORTA-0557	1	2022-08-31	Amoko Denis	Kator PHCC	1	2020-01-23	20	Kator	Married Monogamous	2								Known Pos on ART	2	4 or more visits	4	3	At Health Facility	1	Live Birth-LB	1	Already on ART	1	2019-03-04	1c = TDF/3TC/DTG	3		2020-01-23	Pregnant	2020-03-20	57	<3 months	1	90	90	0					2020-03-23	3	60
	IMPORTA-0558	1	2022-09-01	Amoko Denis	Kator PHCC	1	2020-04-20	35	Khor William					2	2				Newly tested at ANC	1	2 visits	2	2	At Health Facility	1	Live Birth-LB	1			2020-04-20	1c = TDF/3TC/DTG	3		2020-04-20	Pregnant	2020-10-20	183	6+ months	3	180	180	0					2020-08-24	-57	126
	IMPORTA-0559	1	2022-09-01	Amoko Denis	Kator PHCC	1	2020-04-22	28	Kator	Single (never married)	1	Farming	2			44075	20	2	Known Pos on ART	2	1 visit	1	1	At Health Facility	1			Already on ART	1	2019-10-01	1c = TDF/3TC/DTG	3		2019-10-01	Pregnant	2019-12-29	89	<3 months	1	90	90	0					2019-12-30	1	90
	IMPORTA-0560	1	2020-09-01	Amoko Denis	Kator PHCC	1	2020-03-03	22	Gudele 2	Single (never married)	1	Farming	2		3	43966	8	1	Newly tested at ANC	1	1 visit	1	1	At Health Facility	1	Live Birth-LB	1	Already on ART	1	2020-03-03	1c = TDF/3TC/DTG	3		2020-03-09	Pregnant	2020-06-07	90	3-5 months	2	180	180	0					2020-07-23	46	136
	IMPORTA-0561	1	2022-09-01	Amoko Denis	Kator PHCC	1	2020-10-15	31	Konyo konyo	Single (never married)	1	Farming	2	1	4	44218	28	2	Newly tested at ANC	1				At Health Facility	1	Live Birth-LB	1	New on ART -- in pregnancy	2	2020-10-15	1c = TDF/3TC/DTG	3		2020-10-15	Pregnant	2021-04-13	180	6+ months	3	180	180	0					2021-04-15	2	182
	IMPORTA-0562	1	2022-09-01	Amoko Denis	Kator PHCC	1	2020-02-20	24	Kasava	Single (never married)	1	Farming	2	1	2		16	2	Newly tested at ANC	1	2 visits	2	2	At Health Facility	1	Live Birth-LB	1	New on ART -- in pregnancy	2	2020-02-20	1c = TDF/3TC/DTG	3		2020-02-20	Pregnant	2020-05-18	88	<3 months	1	90	90	0					2020-08-13	87	175
	IMPORTA-0563	1	2022-09-01	Amoko Denis	Kator PHCC	1	2020-04-30	37	Lologo	Single (never married)	1	Farming	2	2	2	44107	16	2	Newly tested at ANC	1	3 visits	3	3			Live Birth-LB	1	New on ART -- in pregnancy	2	2020-04-30	1c = TDF/3TC/DTG	3		2020-04-23	Pregnant	2020-07-23	91	3-5 months	2	90	90	0	NA	3	NA	3	2020-07-24	1	92
	IMPORTA-0564	1	2022-09-01	Amoko Denis	Kator PHCC	1	2020-08-11	21	Konyo konyo	Single (never married)	1	Farming	2	5	5	44272	24	2	Newly tested at ANC	1				At Health Facility	1	Live Birth-LB	1	New on ART -- in pregnancy	2	2020-08-11	1c = TDF/3TC/DTG	3		2020-08-11	Pregnant	2021-02-09	182	6+ months	3	180	180	0					2021-03-18	37	219
	IMPORTA-0565	1	2022-09-01	Amoko Denis	Kator PHCC	1	2020-11-03	31	Kator	Single (never married)	1			3	4	44279	24	2	Known Pos on ART	2	1 visit	1	1	At Health Facility	1	Live Birth-LB	1	New on ART -- in pregnancy	2	2016-02-18	1f = TDF/3TC/EFV	6		2020-11-03	Pregnant	2021-05-03	181	6+ months	3	180	180	0					2021-04-22	-11	170
	IMPORTA-0566	1	2022-09-01	Amoko Denis	Kator PHCC	1	2020-01-02	26	Gudele	Single (never married)	1	Farming	2	2	3				Known Pos on ART	2				At Health Facility	1	Live Birth-LB	1	Already on ART	1	2017-11-28	1c = TDF/3TC/DTG	3		2020-01-02	Pregnant	2020-04-02	91	3-5 months	2	90	90	0					2020-04-08	6	97
	IMPORTA-0567	1	2022-09-01	Amoko Denis	Kator PHCC	1	2020-11-13	31	Sherikat					5			24	2	Known Pos on ART	2	1 visit	1	1	At Health Facility	1	Live Birth-LB	1	Already on ART	1	2013-09-13	1c = TDF/3TC/DTG	3		2020-11-12	Pregnant	2021-05-11	180	6+ months	3	180	180	0					2021-05-16	5	185
	IMPORTA-0568	1	2022-09-01	Amoko Denis	Kator PHCC	1	2020-01-23	19	Kator	Married Polygamous	2	Housewife	1	2			12	1	Known Pos on ART	2				At Health Facility	1	Live Birth-LB	1	Already on ART	1	2019-06-12	1c = TDF/3TC/DTG	3		2020-01-23	Pregnant	2020-03-20	57	<3 months	1	90	90	0					2020-03-23	3	60
	IMPORTA-0569	1	2022-09-01	Amoko Denis	Kator PHCC	1	2020-04-27	24	Kasava	Single (never married)	1	Farming	2		3	44033	24	2	Newly tested at ANC	1	2 visits	2	2	At Health Facility	1	Live Birth-LB	1	New on ART -- in pregnancy	2	2020-04-27	1c = TDF/3TC/DTG	3		2020-04-27	Pregnant	2020-07-24	88	<3 months	1	90	90	0	NA	3	NA	3	2020-08-11	18	106
	IMPORTA-0570	1	2022-09-01	Amoko Denis	Kator PHCC	1	2020-12-09	23	Atlabara	Single (never married)	1			4					Known Pos on ART	2	1 visit	1	1	At Health Facility	1			Already on ART	1	2020-12-09	1f = TDF/3TC/EFV	6		2019-10-24	Pregnant	2020-01-24	92	3-5 months	2	90	90	0					2020-01-15	-9	83
	IMPORTA-0571	1	2022-09-01	Amoko Denis	Kator PHCC	1	2020-06-08	25		Single (never married)	1	Farming	2		6	44209	8	1	Newly tested at ANC	1	3 visits	3	3	At Health Facility	1	Live Birth-LB	1	New on ART -- in pregnancy	2	2020-06-09	1c = TDF/3TC/DTG	3		2020-06-08	Pregnant	2020-12-06	181	6+ months	3	180	180	0	NA	3	NA	3	2021-01-18	43	224
	IMPORTA-0572	1	2022-09-01	Amoko Denis	Kator PHCC	1	2020-06-08	26	Konyokonyo	Single (never married)	1	Farming	2	2	3	44027	32	2	Newly tested at ANC	1				At Health Facility	1	Live Birth-LB	1	New on ART -- in pregnancy	2	2020-06-08	1c = TDF/3TC/DTG	3		2020-06-08	Pregnant	2020-12-06	181	6+ months	3	180	180	0					2021-01-06	31	212
	IMPORTA-0573	1	2022-09-01	Amoko Denis	Kator PHCC	1	2020-10-23	32		Single (never married)	1	Farming	2			43885	28	2	Known Pos on ART	2	1 visit	1	1	At Health Facility	1	Live Birth-LB	1	Already on ART	1	2019-02-07	1c = TDF/3TC/DTG	3		2019-09-27	Pregnant	2020-01-27	122	3-5 months	2	120	120	0					2020-01-27	0	122
	IMPORTA-0574	1	2022-09-01	Amoko Denis	Kator PHCC	1	2020-02-17	35	Gumbo	Married Polygamous	2	Farming	2	3	5	43996	20	2	Known Pos on ART	2	2 visits	2	2	At Health Facility	1	Live Birth-LB	1	Already on ART	1	2019-11-04	1c = TDF/3TC/DTG	3		2020-02-14	Pregnant	2020-05-12	88	<3 months	1	180	180	0					2020-05-18	6	94
	IMPORTA-0575	1	2022-09-01	Amoko Denis	Kator PHCC	1	2020-11-05	32	Hai Mayo	Single (never married)	1	Farming	2	4			24	2	Newly tested at ANC	1	2 visits	2	2	At Health Facility	1	Live Birth-LB	1	New on ART -- in pregnancy	2	2020-11-05	1c = TDF/3TC/DTG	3		2020-11-05	Pregnant	2021-05-03	179	3-5 months	2	180	180	0					2021-04-26	-7	172
	IMPORTA-0576	1	2022-09-01	Amoko Denis	Kator PHCC	1	2020-03-10	26	Lologo	Single (never married)	1	Farming	2	5	6		32	2	Newly tested at ANC	1				At Health Facility	1	Live Birth-LB	1	New on ART -- in pregnancy	2		1c = TDF/3TC/DTG	3		2020-03-10	Pregnant	2020-09-10	184	6+ months	3	180	180	0					2020-09-17	7	191
	IMPORTA-0577	1	2022-09-01	Amoko Denis	Kator PHCC	1	2020-03-27	35	Sherikat	Single (never married)	1	Farming	2		3		16	2	Newly tested at ANC	1	1 visit	1	1	At home	2	Live Birth-LB	1	Already on ART	1	2020-03-27	1c = TDF/3TC/DTG	3		2020-03-27	Pregnant	2020-09-28	185	6+ months	3	180	180	0					2020-10-02	4	189
	IMPORTA-0578	1	2022-09-01	Amoko Denis	Kator PHCC	1	2020-03-06	29	Lologo	Single (never married)	1	Farming	2	4	4		12	1	Known Pos on ART	2				At Health Facility	1	Live Birth-LB	1	Already on ART	1	2016-12-08	1c = TDF/3TC/DTG	3		2020-03-06	Pregnant	2020-09-04	182	6+ months	3	180	180	0	NA	3	NA	3	2020-09-16	12	194
	IMPORTA-0579	1	2022-09-01	Amoko Denis	Kator PHCC	1	2020-04-16	30	Lologo	Widowed	3	Farming	2	4	4		15	1	Known Pos on ART	2	1 visit	1	1	At Health Facility	1	Live Birth-LB	1	Already on ART	1	2017-10-23	1c = TDF/3TC/DTG	3		2020-04-16	Pregnant	2020-10-16	183	6+ months	3	180	180	0					2020-11-02	17	200
	IMPORTA-0580	1	2022-09-01	Amoko Denis	Kator PHCC	1	2020-08-27	20	Kator	Married Polygamous	2	Housewife	1				36	2	Newly tested at ANC	1	1 visit	1	1	At home	2	Live Birth-LB	1	New on ART -- in pregnancy	2	2020-08-28	1c = TDF/3TC/DTG	3		2020-08-27	Pregnant	2021-03-26	211	6+ months	3	180	180	0					2021-03-08	-18	193
	IMPORTA-0581	1	2022-09-01	Amoko Denis	Kator PHCC	1	2020-01-09	30	Konyokonyo	Married Monogamous	2			3	5		12	1	Known Pos on ART	2	1 visit	1	1	At Health Facility	1	Live Birth-LB	1	Already on ART	1	2015-11-19	1c = TDF/3TC/DTG	3		2020-01-09	Pregnant	2020-07-09	182	6+ months	3	180	180	0					2020-08-09	31	213
	IMPORTA-0582	1	2022-09-01	Amoko Denis	Kator PHCC	1	2020-08-25	20	Sherikat	Single (never married)	1	Housewife	1	1	2		8	1	Newly tested at ANC	1	1 visit	1	1	At Health Facility	1	Live Birth-LB	1	New on ART -- in pregnancy	2	2020-08-24	1c = TDF/3TC/DTG	3		2020-08-25	Pregnant	2021-02-25	184	6+ months	3	180	180	0					2021-03-30	33	217
	IMPORTA-0583	1	2022-09-01	Amoko Denis	Kator PHCC	1	2020-09-25	32	Gumbo	Single (never married)	1	Farming	2	5		44531			Newly tested at ANC	1	2 visits	2	2	At Health Facility	1	Live Birth-LB	1	New on ART -- in pregnancy	2	2020-09-25	1c = TDF/3TC/DTG	3		2020-09-25	Pregnant	2021-03-25	181	6+ months	3	180	180	0					2021-04-02	8	189
	IMPORTA-0584	1	2022-09-01	Amoko Denis	Kator PHCC	1	2020-08-11	19	Hai Joilyo	Single (never married)	1	Farming	2	2	3	44136			Newly tested at ANC	1	1 visit	1	1	At home	2	Live Birth-LB	1	New on ART -- in pregnancy	2	2020-08-22	1c = TDF/3TC/DTG	3		2020-08-11	Pregnant	2020-11-11	92	3-5 months	2	90	90	0					2020-12-14	33	125
	IMPORTA-0585	1	2022-09-01	Amoko Denis	Kator PHCC	1	2020-06-22	30	Rajaf					5	5		24	2	Newly tested at ANC	1				At Health Facility	1	Live Birth-LB	1	New on ART -- in pregnancy	2	2020-06-22	1c = TDF/3TC/DTG	3		2020-06-22	Pregnant	2021-12-22	548	6+ months	3	180	180	0					2020-12-30	-357	191
	IMPORTA-0586	1	2022-09-01	Amoko Denis	Kator PHCC	1	2020-05-19	27	Sherikat	Single (never married)	1	Farming	2	4		44130	30	2	Newly tested at ANC	1	2 visits	2	2	At Health Facility	1	Live Birth-LB	1	New on ART -- in pregnancy	2	2020-05-18	1c = TDF/3TC/DTG	3		2020-05-19	Pregnant	2020-11-19	184	6+ months	3	180	180	0					2020-11-30	11	195
	IMPORTA-0587	1	2022-09-09	Amoko Denis	Kator PHCC	1	2021-03-19	24	Kadoro	Single (never married)	1	Farming	2		4	44471	12	1	Known Pos on ART	2				At home	2	Live Birth-LB	1	Already on ART	1	2020-06-29	1c = TDF/3TC/DTG	3		2020-06-29	Pregnant	2021-12-29	548	6+ months	3	180	180	0					2020-12-22	-372	176
	IMPORTA-0588	1	2022-09-02	Amoko Denis	Kator PHCC	1	2021-02-11	30	lologo	Single (never married)	1			7	7	44336	12	1	Known Pos on ART	2	2 visits	2	2	At Health Facility	1					2018-05-07	1c = TDF/3TC/DTG	3		2021-02-11	Pregnant	2021-08-09	179	3-5 months	2	180	180	0	NA	3	NA	3	2021-09-21	43	222
	IMPORTA-0589	1	2022-09-02	Amoko Denis	Kator PHCC	1	2021-02-15	35	Kasava	Single (never married)	1	Farming	2	2	4	44344	20	2	Known Pos on ART	2	1 visit	1	1	At Health Facility	1	Live Birth-LB	1	Already on ART	1	2018-03-29	1c = TDF/3TC/DTG	3		2021-02-15	Pregnant	2021-08-13	179	3-5 months	2	180	180	0					2021-09-09	27	206
	IMPORTA-0590	1	2022-09-02	Amoko Denis	Kator PHCC	1	2021-04-27	20	Sherikat	Single (never married)	1				6	44484	12	1	Known Pos on ART	2				At Health Facility	1	Live Birth-LB	1	Already on ART	1	2021-04-27	1c = TDF/3TC/DTG	3		2021-04-27	Pregnant	2021-10-04	160	3-5 months	2	180	180	0	Yes	1	Suppressed	1	2021-10-11	7	167
	IMPORTA-0591	1	2022-09-02	Amoko Denis	Kator PHCC	1	2021-05-04	32	Kator	Married Polygamous	2	Farming	2	3		44484	12	1	Known Pos on ART	2	2 visits	2	2	At Health Facility	1	Live Birth-LB	1	Already on ART	1	2020-05-04	1c = TDF/3TC/DTG	3		2020-01-20	Pregnant	2020-04-18	89	<3 months	1	90	90	0					2020-10-02	167	256
	IMPORTA-0592	1	2022-09-02	Amoko Denis	Kator PHCC	1	2021-06-10	33	Lologo	Single (never married)	1	Farming	2			44391	32	2	Known Pos on ART	2	2 visits	2	2	At Health Facility	1	Live Birth-LB	1	Already on ART	1	2019-09-18	1c = TDF/3TC/DTG	3		2021-06-10	Pregnant	2021-12-10	183	6+ months	3	180	180	0					2021-10-11	-60	123
	IMPORTA-0593	1	2022-09-02	Amoko Denis	Kator PHCC	1	2021-06-24	29	Kator	Single (never married)	1	Farming	2	3	4	44375	24	2	Known Pos on ART	2	1 visit	1	1	At home	2	Live Birth-LB	1	Already on ART	1	2020-06-15	1c = TDF/3TC/DTG	3		2020-06-15	Pregnant	2020-12-15	183	6+ months	3	180	180	0					2020-11-25	-20	163
	IMPORTA-0594	1	2022-09-02	Amoko Denis	Kator PHCC	1	2021-08-05	28	Sherikat	Single (never married)	1	Farming	2	4		44361	8	1	Known Pos on ART	2	1 visit	1	1	At Health Facility	1	Live Birth-LB	1	Already on ART	1	2019-08-05	1c = TDF/3TC/DTG	3		2020-10-28	Pregnant	2021-04-24	178	3-5 months	2	180	180	0	NA	3	NA	3	2021-05-04	10	188
	IMPORTA-0595	1	2022-09-02	Amoko Denis	Kator PHCC	1	2021-09-01	25	Sherikat	Single (never married)	1	Farming	2	2	2	44525	20	2	Known Pos on ART	2	1 visit	1	1	At Health Facility	1	Live Birth-LB	1	Already on ART	1	2021-09-01	1c = TDF/3TC/DTG	3		2020-01-25	Pregnant	2020-06-25	152	3-5 months	2	180	180	0					2021-01-15	204	356
	IMPORTA-0596	1	2022-09-02	Amoko Denis	Kator PHCC	1	2021-09-29	28	Tongping	Single (never married)	1	Farming	2	1		44564	24	2	Known Pos on ART	2	3 visits	3	3	At Health Facility	1			Already on ART	1	2019-02-18	1c = TDF/3TC/DTG	3		2021-09-29	Pregnant	2021-12-22	84	<3 months	1	90	90	0	NA	3	NA	3	2022-09-03	346	430
	IMPORTA-0597	1	2022-09-02	Amoko Denis	Kator PHCC	1	2021-03-10	25	Lafa Sherikat	Single (never married)	1	Farming	2	5	6	43937	12	1	Newly tested at ANC	1	2 visits	2	2	At Health Facility	1	Live Birth-LB	1	Already on ART	1	2021-03-10	1c = TDF/3TC/DTG	3		2020-02-10	Pregnant	2020-05-11	91	3-5 months	2	90	90	0					2020-05-29	18	109
	IMPORTA-0598	1	2022-09-02	Amoko Denis	Kator PHCC	1	2021-04-07	34	Nimir talata	Single (never married)	1	Farming	2	5		44216	4	1	Newly tested at ANC	1				At Health Facility	1	Live Birth-LB	1	New on ART -- in pregnancy	2		1c = TDF/3TC/DTG	3		2021-04-07	Pregnant	2021-10-04	180	6+ months	3	180	180	0					2021-09-22	-12	168
	IMPORTA-0599	1	2022-09-02	Amoko Denis	Kator PHCC	1	2021-04-21	25	Jondoru	Single (never married)	1	Farming	2	6		44540	4	1	Newly tested at ANC	1				At Health Facility	1	Live Birth-LB	1	New on ART -- in pregnancy	2	2021-04-21	1c = TDF/3TC/DTG	3		2021-04-21	Pregnant	2021-10-21	183	6+ months	3	180	180	0	NA	3	NA	3	2021-10-18	-3	180
	IMPORTA-0600	1	2022-09-02	Amoko Denis	Kator PHCC	1	2021-04-08	18	Sherikat	Single (never married)	1			6	6	44348	24	2	Known Pos on ART	2	1 visit	1	1	At Health Facility	1			Already on ART	1	2021-04-07	1c = TDF/3TC/DTG	3		2020-03-20	Pregnant	2020-05-19	60	<3 months	1	90	90	0					2020-05-19	0	60
	IMPORTA-0601	1	2022-09-02	Amoko Denis	Kator PHCC	1	2021-04-27	32	Konyokonyo	Single (never married)	1			3	3	44308	40	2	Known Pos on ART	2	2 visits	2	2	At home	2	Live Birth-LB	1	Already on ART	1	2020-04-27	1c = TDF/3TC/DTG	3		2020-06-08	Pregnant	2020-12-08	183	6+ months	3	180	180	0	NA	3	NA	3	2021-04-27	140	323
	IMPORTA-0602	1	2022-09-02	Amoko Denis	Kator PHCC	1	2021-01-12	18	Kator			Farming	2	2	3				Known Pos on ART	2	1 visit	1	1	At Health Facility	1	Live Birth-LB	1	Already on ART	1	2019-10-14	1c = TDF/3TC/DTG	3		2019-10-14	Pregnant	2020-01-14	92	3-5 months	2	90	90	0	NA	3	NA	3	2020-02-05	22	114
	IMPORTA-0603	1	2022-09-02	Amoko Denis	Kator PHCC	1	2021-05-28	32	Gumbo Bridge	Single (never married)	1			7	7	44448			Known Pos on ART	2	1 visit	1	1	At Health Facility	1	Live Birth-LB	1	Already on ART	1	2019-05-28	1c = TDF/3TC/DTG	3		2021-05-28	Pregnant	2021-08-28	92	3-5 months	2	180	180	0					2021-08-28	0	92
	IMPORTA-0604	1	2022-09-02	Amoko Denis	Kator PHCC	1	2021-06-09	32	Lologo	Single (never married)	1	Farming	2				12	1	Known Pos on ART	2				At Health Facility	1	Live Birth-LB	1	Already on ART	1	2021-06-09	1c = TDF/3TC/DTG	3		2021-06-09	Pregnant	2021-12-09	183	6+ months	3	180	180	0					2022-01-24	46	229
	IMPORTA-0605	1	2022-09-02	Amoko Denis	Kator PHCC	1	2021-06-24	33	Giada	Single (never married)	1	Farming	2	2		44610	8	1	Newly tested at ANC	1				At home	2	Live Birth-LB	1	Already on ART	1	2021-06-24	1c = TDF/3TC/DTG	3		2021-06-24	Pregnant	2021-12-23	182	6+ months	3	180	180	0					2021-12-27	4	186
	IMPORTA-0606	1	2022-09-02	Amoko Denis	Kator PHCC	1	2021-05-28	28	Nyakuron west			Farming	2		6	44456	28	2	Known Pos on ART	2	1 visit	1	1	At Health Facility	1			Already on ART	1	2020-06-28	1c = TDF/3TC/DTG	3		2021-05-28	Pregnant	2021-11-29	185	6+ months	3	180	180	0	Yes	1	Suppressed	1	2021-11-05	-24	161
	IMPORTA-0607	1	2022-09-02	Amoko Denis	Kator PHCC	1	2021-05-03	22	Gumbo Sherikat	Single (never married)	1	Farming	2	2	3	44419	24	2	Newly tested at ANC	1	2 visits	2	2	At Health Facility	1	Live Birth-LB	1	New on ART -- in pregnancy	2	2021-05-03	1c = TDF/3TC/DTG	3		2021-05-03	Pregnant	2021-11-03	184	6+ months	3	180	180	0	NA	3	NA	3	2021-12-08	35	219
	IMPORTA-0608	1	2022-09-02	Amoko Denis	Kator PHCC	1	2021-01-08	23	Jebel	Single (never married)	1	Farming	2	1	2	44281	28	2	Known Pos on ART	2	2 visits	2	2	At Health Facility	1	Live Birth-LB	1	Already on ART	1	2017-06-20	1c = TDF/3TC/DTG	3		2021-01-08	Pregnant	2021-05-07	119	3-5 months	2	180	180	0	Yes	1	Suppressed	1	2021-05-14	7	126
	IMPORTA-0609	1	2022-09-02	Amoko Denis	Kator PHCC	1	2021-05-15	38	Jondoro	Single (never married)	1	Farming	2	4	5	44336	20	2	Newly tested at ANC	1	1 visit	1	1	At Health Facility	1	Live Birth-LB	1	New on ART -- in pregnancy	2	2021-02-16	1c = TDF/3TC/DTG	3		2021-02-15	Pregnant	2021-08-16	182	6+ months	3	180	180	0					2021-09-02	17	199
	IMPORTA-0610	1	2022-09-02	Amoko Denis	Kator PHCC	1	2021-04-23	26	Lologo	Single (never married)	1	Farming	2	3		44545			Known Pos on ART	2	2 visits	2	2	At Health Facility	1	Live Birth-LB	1	Already on ART	1	2021-04-23	1c = TDF/3TC/DTG	3		2021-04-23	Pregnant	2021-11-23	214	6+ months	3	180	180	0	Yes	1	Suppressed	1	2021-11-30	7	221
	IMPORTA-0611	1	2022-08-09	Mawa Mark	Gurei PHCC	1	2021-11-23	35	Suk Zande	Married Polygamous	2	Housewife	1	3	3	44689	8	1	Newly tested at ANC	1	4 or more visits	4	3	At Health Facility	1	Live Birth-LB	1	New on ART -- in pregnancy	2	2021-11-23	1c = TDF/3TC/DTG	3		2021-11-23	Pregnant	2022-02-22	91	3-5 months	2	90	90	0	NA	3	NA	3	2022-02-21	-1	90
	IMPORTA-0612	1	2022-08-29	Mawa Mark	Gurei PHCC	1	2019-10-24	28	Gurie	Married Polygamous	2	Housewife	1	5	2	43907	16	2	Newly tested at ANC	1	1 visit	1	1	At Health Facility	1	Live Birth-LB	1	Already on ART	1		1c = TDF/3TC/DTG	3		2019-10-24	Pregnant	2019-12-22	59	<3 months	1	60	60	0					2020-01-20	29	88
	IMPORTA-0613	1	2022-08-29	Mawa Mark	Gurei PHCC	1	2021-11-09	28	Hai Battery	Married Monogamous	2	Housewife	1	2		44562	28	2	Newly tested at ANC	1	3 visits	3	3	At Health Facility	1	Live Birth-LB	1	New on ART -- in pregnancy	2	2021-11-09	1c = TDF/3TC/DTG	3		2021-11-09	Pregnant	2022-02-08	91	3-5 months	2	90	90	0	No	2	NA	3	2022-03-15	35	126
	IMPORTA-0614	1	2022-08-29	Mawa Mark	Gurei PHCC	1		38	Battery			Housewife	1		3	43831	24	2	Known Pos on ART	2	4 or more visits	4	3	At Health Facility	1	Live Birth-LB	1	Already on ART	1	2016-12-15	1c = TDF/3TC/DTG	3		2020-09-08	Pregnant	2021-03-08	181	6+ months	3	180	180	0					2021-09-25	201	382
	IMPORTA-0615	1	2022-08-29	Mawa Mark	Gurei PHCC	1	2019-11-11	26	Gudele	Married Polygamous	2	Housewife	1	3		43902	13	1	Newly tested at ANC	1	1 visit	1	1	At Health Facility	1	Live Birth-LB	1	New on ART -- in pregnancy	2	2019-11-12	1c = TDF/3TC/DTG	3		2019-11-12	Pregnant	2019-11-29	17	<3 months	1	90	90	0					2019-11-29	0	17
	IMPORTA-0616	1	2022-08-29	Mawa Mark	Gurei PHCC	1	2021-11-02	30	Lemon Gaba	Single (never married)	1	Farming	2		3	44593	20	2	Known Pos on ART	2	4 or more visits	4	3	At Health Facility	1	Live Birth-LB	1	Already on ART	1	2018-07-23	1c = TDF/3TC/DTG	3		2021-11-02	Pregnant	2021-02-02				90	90	0	NA	3	NA	3	2022-01-31	363	90
	IMPORTA-0617	1	2022-08-29	Mawa Mark	Gurei PHCC	1	2021-11-02	23	Gurie	Married Monogamous	2	Housewife	1	3		44647	28	2	Newly tested at ANC	1				At home	2	Live Birth-LB	1			2022-11-02	1c = TDF/3TC/DTG	3		2021-11-02	Pregnant	2022-01-31	90	3-5 months	2	90	90	0	NA	3	NA	3	2021-01-09	-387
	IMPORTA-0618	1	2022-08-29	Mawa Mark	Gurei PHCC	1	2019-12-16	19	Kapuri	Married Monogamous	2	Housewife	1		5		18	2	Known Pos on ART	2	4 or more visits	4	3	At Health Facility	1	Live Birth-LB	1	Already on ART	1	2018-07-24	1c = TDF/3TC/DTG	3		2019-12-16	Pregnant	2020-03-23	98	3-5 months	2	90	90	0					2020-03-23	0	98
	IMPORTA-0619	1	2022-08-29	Mawa Mark	Gurei PHCC	1	2019-12-03	25	Gudele	Married Monogamous	2	Housewife	1	2	3	43973	16	2	Newly tested at ANC	1	1 visit	1	1	At Health Facility	1	Live Birth-LB	1	New on ART -- in pregnancy	2	2019-12-03	1c = TDF/3TC/DTG	3		2019-12-03	Pregnant	2020-03-02	90	3-5 months	2	90	90	0					2020-03-03	1	91
	IMPORTA-0620	1	2022-08-29	Mawa Mark	Gurei PHCC	1	2019-12-10	26	Rovuru	Married Monogamous	2	Housewife	1	3	3	43922	20	2	Newly tested at ANC	1	4 or more visits	4	3	At Health Facility	1			New on ART -- in pregnancy	2	2019-12-10	1c = TDF/3TC/DTG	3		2019-12-10	Pregnant	2019-08-06				90	90	0					2020-05-07	275	149
	IMPORTA-0622	1	2022-08-29	Mawa Mark	Gurei PHCC	1	2022-01-14	21	Gudele	Single (never married)	1	Farming	2	2	3	44596	32	2	Newly tested at ANC	1				At Health Facility	1	Live Birth-LB	1	New on ART -- in pregnancy	2		1c = TDF/3TC/DTG	3		2022-01-14	Pregnant	2022-04-14	90	3-5 months	2	90	90	0	NA	3	NA	3	2022-04-14	0	90
	IMPORTA-0623	1		Mawa Mark	Gurei PHCC	1	2020-01-21	24	Gudele2	Married Monogamous	2	Housewife	1	2	3	43932	24	2	Newly tested at ANC	1	3 visits	3	3	At Health Facility	1	Live Birth-LB	1	New on ART -- in pregnancy	2	2020-01-21	1c = TDF/3TC/DTG	3		2020-01-21	Pregnant	2020-03-17	56	<3 months	1	90	90	0					2020-04-17	31	87
	IMPORTA-0624	1	2022-08-29	Mawa Mark	Gurei PHCC	1	2022-01-14	24	Hai Baraka	Single (never married)	1	Farming	2	7		44756	10	1	Known Pos on ART	2	1 visit	1	1	At Health Facility	1	Live Birth-LB	1	Already on ART	1	2017-11-02	1c = TDF/3TC/DTG	3		2022-01-14	Pregnant	2022-07-13	180	6+ months	3	180	120	60	Yes	1	Suppressed	1	2022-05-17	-57	123
	IMPORTA-0625	1	2022-08-29	Mawa Mark	Gurei PHCC	1	2023-01-11	21	New Down	Married Monogamous	2	Housewife	1	4		44693	20	2	Newly tested at ANC	1	1 visit	1	1	At Health Facility	1	Live Birth-LB	1	Already on ART	1	2022-01-11	1c = TDF/3TC/DTG	3		2022-01-11	Pregnant	2022-04-08	87	<3 months	1	90	90	0	NA	3	NA	3	2022-05-25	47	134
	IMPORTA-0626	1	2022-08-29	Mawa Mark	Gurei PHCC	1	2020-10-04	20	Lemon Gaba			Housewife	1	2	3	44686	24	2	Newly tested at ANC	1				At Health Facility	1	Live Birth-LB	1	New on ART -- in pregnancy	2	2022-01-04	1c = TDF/3TC/DTG	3		2022-01-04	Pregnant	2022-04-01	87	<3 months	1	90	90	0	NA	3	NA	3	2022-06-07	67	154
	IMPORTA-0627	1	2022-08-29	Mawa Mark	Gurei PHCC	1	2020-02-20	33	Gudele2	Married Monogamous	2	Housewife	1			44008	20	2	Newly tested at ANC	1	1 visit	1	1	At Health Facility	1	Live Birth-LB	1	New on ART -- in pregnancy	2	2020-02-20	1c = TDF/3TC/DTG	3		2020-02-20	Pregnant	2020-05-20	90	3-5 months	2	90	90	0					2020-08-17	89	179
	IMPORTA-0628	1	2022-08-29	Mawa Mark	Gurei PHCC	1	2020-03-02	20	Joppa	Married Monogamous	2	Housewife	1	1	2	43899	36	2	Known Pos on ART	2	1 visit	1	1	At Health Facility	1	Live Birth-LB	1	Already on ART	1	2019-05-02	1c = TDF/3TC/DTG	3		2020-03-20	Pregnant	2020-06-28	100	3-5 months	2	90	90	0					2020-06-15	-13	87
	IMPORTA-0629	1	2022-08-29	Mawa Mark	Gurei PHCC	1	2020-03-24	27	Jebel Dinka	Married Monogamous	2	Housewife	1	3	3	43990	24	2	Known Pos on ART	2	3 visits	3	3	At Health Facility	1	Live Birth-LB	1	Already on ART	1	2015-12-17	1c = TDF/3TC/DTG	3		2020-05-13	Pregnant	2020-11-13	184	6+ months	3	180	180	0	Yes	1	Suppressed	1	2020-11-19	6	190
	IMPORTA-0630	1	2022-08-29	Mawa Mark	Gurei PHCC	1	2020-04-03	26	Kaburi	Married Monogamous	2	Housewife	1		3	43902	36	2	Known Pos on ART	2	1 visit	1	1	At home	2			Already on ART	1	2017-08-16	1c = TDF/3TC/DTG	3		2020-04-08	Pregnant	2020-09-08	153	3-5 months	2	90	90	0	Yes	1	Suppressed	1	2020-10-08	30	183
	IMPORTA-0631	1	2022-08-29	Mawa Mark	Gurei PHCC	1	2020-04-17	20	Gudele2	Married Monogamous	2	Housewife	1		3	44014	24	2	Known Pos on ART	2	1 visit	1	1	At Health Facility	1	Live Birth-LB	1	Already on ART	1	2017-09-11	1c = TDF/3TC/DTG	3		2020-04-17	Pregnant	2020-07-16	90	3-5 months	2	90	90	0	Yes	1	Suppressed	1	2020-07-23	7	97
	IMPORTA-0632	1	2022-08-29	Mawa Mark	Gurei PHCC	1	2020-04-16	21	Gurie	Married Monogamous	2	Housewife	1	2	3	43983	12	1	Newly tested at ANC	1	1 visit	1	1	At Health Facility	1	Live Birth-LB	1	Already on ART	1	2020-04-16	1c = TDF/3TC/DTG	3		2020-04-16	Pregnant	2020-07-15	90	3-5 months	2	90	90	0					2020-08-11	27	117
	IMPORTA-0633	1	2022-08-29	Mawa Mark	Gurei PHCC	1	2020-04-28	35	Gudele2	Married Monogamous	2	Housewife	1	1	2	44118	20	2	Newly tested at ANC	1	4 or more visits	4	3	At Health Facility	1	Live Birth-LB	1	New on ART -- in pregnancy	2	2020-04-28	1c = TDF/3TC/DTG	3		2020-04-28	Pregnant	2020-07-24	87	<3 months	1	90	90	0					2020-08-23	30	117
	IMPORTA-0634	1	2022-08-29	Mawa Mark	Gurei PHCC	1		35	Gudele2	Married Monogamous	2	Housewife	1	1	2	44118	20	2	Newly tested at ANC	1	4 or more visits	4	3	At Health Facility	1	Live Birth-LB	1	New on ART -- in pregnancy	2		1c = TDF/3TC/DTG	3		2020-04-28	Pregnant	2020-07-24	87	<3 months	1	90	90	0					2020-07-23	-1	86
	IMPORTA-0635	1	2022-09-01	Mawa Mark	Gurei PHCC	1	2020-05-19	24	Hai Baraka	Married Monogamous	2	Housewife	1	1	2	44039	28	2	Known Pos on ART	2	3 visits	3	3	At Health Facility	1			Already on ART	1		1c = TDF/3TC/DTG	3		2020-03-19	Pregnant	2020-06-19	92	3-5 months	2	90	90	0					2020-06-19	0	92
	IMPORTA-0636	1	2022-09-01	Mawa Mark	Gurei PHCC	1	2020-05-08	35	Hai Gudele	Married Monogamous	2	Housewife	1	2		44032	36	2	Known Pos on ART	2	1 visit	1	1	At home	2	Live Birth-LB	1	Already on ART	1		1c = TDF/3TC/DTG	3		2020-05-28	Pregnant	2020-11-27	183	6+ months	3	180	180	0	Yes	1	Suppressed	1	2021-01-03	37	220
	IMPORTA-0637	1	2020-05-07	Mawa Mark	Gurei PHCC	1	2020-05-07	30	Gudele	Married Monogamous	2	Housewife	1	3	3	44094	16	2	Newly tested at ANC	1	4 or more visits	4	3	At Health Facility	1	Live Birth-LB	1	New on ART -- in pregnancy	2	2020-05-07	1c = TDF/3TC/DTG	3		2020-05-07	Pregnant	2020-08-07	92	3-5 months	2	90	90	0					2020-08-26	19	111
	IMPORTA-0638	1	2022-08-31	Mawa Mark	Gurei PHCC	1	2020-05-29	20	Jabor			Housewife	1	1	2	44135	16	2	Newly tested at ANC	1	4 or more visits	4	3	At Health Facility	1	Live Birth-LB	1			2020-05-29	1c = TDF/3TC/DTG	3		2020-05-29	Pregnant	2020-11-27	182	6+ months	3	180	180	0	Yes	1	Suppressed	1	2020-11-27	0	182
	IMPORTA-0639	1	2022-08-31	Mawa Mark	Gurei PHCC	1	2020-06-09	26	Gudele2	Married Monogamous	2	Housewife	1	1		44131	18	2	Known Pos on ART	2	3 visits	3	3	At Health Facility	1	Live Birth-LB	1	Already on ART	1		1c = TDF/3TC/DTG	3		2020-06-09	Pregnant	2020-08-21	73	<3 months	1	90	90	0	Yes	1	Suppressed	1	2020-08-03	-18	55
	IMPORTA-0640	1	2022-08-31	Mawa Mark	Gurei PHCC	1	2020-06-22	27	Gudele2	Married Monogamous	2	Housewife	1	2	3	44120	20	2	Known Pos on ART	2	4 or more visits	4	3	At Health Facility	1	Live Birth-LB	1	Already on ART	1	2018-05-15	1c = TDF/3TC/DTG	3		2020-06-22	Pregnant	2020-12-20	181	6+ months	3	180	180	0					2020-12-18	-2	179
	IMPORTA-0641	1	2022-08-31	Mawa Mark	Gurei PHCC	1	2020-07-02	24	Suk Zande	Married Monogamous	2	Housewife	1	2	3	44159	20	2	Newly tested at ANC	1	1 visit	1	1	At Health Facility	1	Live Birth-LB	1	New on ART -- in pregnancy	2	2020-07-02	1c = TDF/3TC/DTG	3		2020-07-02	Pregnant	2021-01-01	183	6+ months	3	180	180	0					2020-12-21	-11	172
	IMPORTA-0642	1	2022-08-31	Mawa Mark	Gurei PHCC	1	2020-07-21	24	Gudele2	Married Monogamous	2	Housewife	1	1	2	44117	24	2	Newly tested at ANC	1	3 visits	3	3	At Health Facility	1	Live Birth-LB	1	New on ART -- in pregnancy	2	2020-07-21	1c = TDF/3TC/DTG	3		2020-07-21	Pregnant	2021-01-20	183	6+ months	3	180	180	0					2021-01-21	1	184
	IMPORTA-0643	1	2022-08-31	Mawa Mark	Gurei PHCC	1	2020-08-04	34	Jebel	Married Monogamous	2	Housewife	1	1	2	44155	20	2	Known Pos not on ART	2	4 or more visits	4	3	At Health Facility	1	Live Birth-LB	1	New on ART -- in pregnancy	2	2020-08-04	1c = TDF/3TC/DTG	3		2020-08-04	Pregnant	2021-02-03	183	6+ months	3	180	100	80					2021-01-25	-9	174
	IMPORTA-0644	1	2022-09-01	Mawa Mark	Gurei PHCC	1	2020-08-25	26	Gudele	Married Monogamous	2	Housewife	1	5	3	44156	20	2	Known Pos on ART	2	1 visit	1	1	At home	2	Live Birth-LB	1	New on ART -- in pregnancy	2	2019-09-18	1c = TDF/3TC/DTG	3		2020-08-25	Pregnant	2021-02-24	183	6+ months	3	180	180	0					2022-02-22	363	546
	IMPORTA-0645	1	2022-09-01	Mawa Mark	Gurei PHCC	1	2020-09-11	21	Jebel Dinka	Married Monogamous	2	Housewife	1		3	44250	16	2	Known Pos on ART	2	1 visit	1	1	At Health Facility	1	Live Birth-LB	1	Already on ART	1	2019-03-20	1c = TDF/3TC/DTG	3		2020-09-03	Pregnant	2021-03-02	180	6+ months	3	180	180	0	Yes	1	Suppressed	1	2021-01-08	-53	127
	IMPORTA-0646	1	2022-09-01	Mawa Mark	Gurei PHCC	1	2020-09-16	27	Gurie	Married Monogamous	2	Housewife	1		3	44105	34	2	Known Pos on ART	2	1 visit	1	1	At Health Facility	1	Live Birth-LB	1	Already on ART	1	2017-02-17	1c = TDF/3TC/DTG	3		2020-09-16	Pregnant	2021-03-15	180	6+ months	3	180	180	0	Yes	1	Suppressed	1	2021-03-12	-3	177
	IMPORTA-0647	1	2022-09-01	Mawa Mark	Gurei PHCC	1	2020-09-22	23	Gude6	Married Polygamous	2	Housewife	1	1	1	44308	12	1	Newly tested at ANC	1				At Health Facility	1	Live Birth-LB	1	New on ART -- postpartum	2	2020-09-22	1c = TDF/3TC/DTG	3		2020-09-22	Pregnant	2021-03-22	181	6+ months	3	180	180	0					2021-03-01	-21	160
	IMPORTA-0648	1	2022-09-01	Mawa Mark	Gurei PHCC	1	2020-10-06	28	Gudele2	Single (never married)	1	Housewife	1	5	1	44252	16	2	Known Pos on ART	2	4 or more visits	4	3	At Health Facility	1	Live Birth-LB	1	Already on ART	1	2017-08-17	1c = TDF/3TC/DTG	3		2020-10-06	Pregnant	2021-04-12	188	6+ months	3	180	180	0					2021-04-15	3	191
	IMPORTA-0649	1	2022-09-01	Mawa Mark	Gurei PHCC	1	2020-10-06	18	Jebel	Married Monogamous	2	Housewife	1		3	43948	20	2	Newly tested at ANC	1	4 or more visits	4	3	At Health Facility	1	Live Birth-LB	1	New on ART -- in pregnancy	2	2020-10-06	1c = TDF/3TC/DTG	3		2020-10-06	Pregnant	2021-04-06	182	6+ months	3	180	180	0					2021-04-12	6	188
	IMPORTA-0650	1	2022-09-01	Mawa Mark	Gurei PHCC	1	2020-10-14	25	Gurie	Married Monogamous	2	Housewife	1		1	44272	18	2	Newly tested at ANC	1	1 visit	1	1	At Health Facility	1	Live Birth-LB	1	New on ART -- in pregnancy	2	2020-10-14	1c = TDF/3TC/DTG	3		2020-10-14	Pregnant	2021-04-14	182	6+ months	3	180	180	0	Yes	1	Suppressed	1	2021-04-14	0	182
	IMPORTA-0651	1	2022-09-01	Mawa Mark	Gurei PHCC	1	2020-11-03	33	Gurie	Married Monogamous	2	Unemployed	1	3		44228	14	1	Known Pos on ART	2	2 visits	2	2	At Health Facility	1	Live Birth-LB	1	Already on ART	1	2016-12-07	1c = TDF/3TC/DTG	3		2020-10-08	Pregnant	2021-04-28	202	6+ months	3	180	180	0	Yes	1	Suppressed	1	2021-04-15	-13	189
	IMPORTA-0652	1	2022-09-01	Mawa Mark	Gurei PHCC	1	2020-11-09	36	Battery	Married Monogamous	2	Other Uniformed forces (Police, Wildlife, Prisons, Fire Brigade)	2	2	3	44388	20	2	Newly tested at ANC	1	3 visits	3	3	At Health Facility	1	Live Birth-LB	1	Already on ART	1	2020-11-09	1c = TDF/3TC/DTG	3		2020-11-09	Pregnant	2021-05-07	179	3-5 months	2	180	180	0	Yes	1	Suppressed	1	2021-05-07	0	179
	IMPORTA-0653	1	2022-09-01	Mawa Mark	Gurei PHCC	1	2020-11-17	25	Kapuri	Married Monogamous	2	Housewife	1	2	3	44268	20	2	Newly tested at ANC	1	1 visit	1	1	At Health Facility	1	Live Birth-LB	1			2020-11-17	1c = TDF/3TC/DTG	3		2020-11-17	Pregnant	2021-05-17	181	6+ months	3	180	180	0	NA	3	NA	3	2021-11-03	170	351
	IMPORTA-0654	1	2022-09-01	Mawa Mark	Gurei PHCC	1	2020-11-17	22	Gurie	Married Monogamous	2	Other Uniformed forces (Police, Wildlife, Prisons, Fire Brigade)	2	1	2	44269	20	2	Known Pos on ART	2	1 visit	1	1	At Health Facility	1	Live Birth-LB	1	Already on ART	1	2020-08-18	1c = TDF/3TC/DTG	3		2020-08-18	Pregnant	2021-02-17	183	6+ months	3	180	180	0	Yes	1	Suppressed	1	2021-02-05	-12	171
	IMPORTA-0655	1	2022-09-01	Mawa Mark	Gurei PHCC	1	2020-12-17	30	Jebel	Married Monogamous	2	Housewife	1	1	3	44143	30	2	Known Pos on ART	2	1 visit	1	1	At Health Facility	1	Live Birth-LB	1	Already on ART	1	2018-06-16	1c = TDF/3TC/DTG	3		2020-11-17	Pregnant	2021-05-04	168	3-5 months	2	180	180	0					2021-05-20	16	184
	IMPORTA-0656	1	2022-09-01	Mawa Mark	Gurei PHCC	1	2020-12-15	32	Hai Battery	Widowed	3	Housewife	1	3	3	44013	12	1	Newly tested at ANC	1	2 visits	2	2	At Health Facility	1	Live Birth-LB	1	New on ART -- in pregnancy	2	2020-12-15	1c = TDF/3TC/DTG	3		2020-12-15	Pregnant	2021-06-14	181	6+ months	3	180	180	0					2021-06-28	14	195
	IMPORTA-0657	1	2022-09-01	Mawa Mark	Gurei PHCC	1	2020-12-15	38	Suk Zande	Married Monogamous	2	Housewife	1	3	3	44322	16	2	Newly tested at ANC	1	3 visits	3	3	At Health Facility	1	Live Birth-LB	1	New on ART -- in pregnancy	2	2020-12-15	1c = TDF/3TC/DTG	3		2020-12-15	Pregnant	2021-06-14	181	6+ months	3	180	180	0					2021-06-02	-12	169
	IMPORTA-0658	1	2022-09-01	Mawa Mark	Gurei PHCC	1		20	Hai Baraka	Married Polygamous	2	Housewife	1		2		12	1	Known Pos on ART	2	1 visit	1	1	At Health Facility	1	Live Birth-LB	1	Already on ART	1	2019-10-01	1c = TDF/3TC/DTG	3		2020-11-19	Breastfeeding	2021-05-19	181	6+ months	3	180	180	0					2021-05-11	-8	173
	IMPORTA-0659	1	2022-09-01	Mawa Mark	Gurei PHCC	1	2021-01-04	24	Gurie			Housewife	1		3	44098	36	2	Known Pos on ART	2	1 visit	1	1	At Health Facility	1	Live Birth-LB	1	Already on ART	1	2015-12-20	1c = TDF/3TC/DTG	3		2021-01-04	Breastfeeding	2021-06-03	150	3-5 months	2	180	180	0	Yes	1	Suppressed	1	2021-07-06	33	183
	IMPORTA-0660	1	2022-09-01	Mawa Mark	Gurei PHCC	1	2021-01-13	21	Gudele2	Married Monogamous	2	Housewife	1		1	44311	24	2	Known Pos on ART	2	1 visit	1	1	At Health Facility	1	Live Birth-LB	1	Already on ART	1	2020-04-14	1c = TDF/3TC/DTG	3		2021-01-13	Pregnant	2021-07-12	180	6+ months	3	180	180	0	Yes	1	Suppressed	1	2021-07-12	0	180
	IMPORTA-0661	1	2022-09-01	Mawa Mark	Gurei PHCC	1	2021-01-18	30	Gudele2	Married Polygamous	2	Housewife	1	2	3	44169	34	2	Known Pos on ART	2	1 visit	1	1	At Health Facility	1	Live Birth-LB	1	Already on ART	1	2014-10-16	1c = TDF/3TC/DTG	3		2021-01-18	Breastfeeding	2021-07-19	182	6+ months	3	180	180	0	Yes	1	Suppressed	1	2021-07-19	0	182
	IMPORTA-0662	1	2022-09-01	Mawa Mark	Gurei PHCC	1	2021-01-18	26	Gudele2	Married Monogamous	2	Housewife	1	1	2	44256	24	2	Known Pos on ART	2	2 visits	2	2	At Health Facility	1	Live Birth-LB	1	Already on ART	1	2016-01-15	1c = TDF/3TC/DTG	3		2020-02-25	Breastfeeding	2020-08-25	182	6+ months	3	180	180	0					2020-08-27	2	184
	IMPORTA-0663	1	2022-08-31	Arach Maker Arach	Rumbek Hospital	2	2019-11-27	35	Malual Bab	Single (never married)	1				3		11	1	Known Pos on ART	2	2 visits	2	2	At home	2	Live Birth-LB	1	Already on ART	1		1f = TDF/3TC/EFV	6		2019-11-27	Breastfeeding	2020-03-27	121	3-5 months	2	180	182	-2	NA	3	NA	3	2020-05-29	63	184
	IMPORTA-0664	1	2022-08-30	Mawa Mark	Gurei PHCC	1		20	Akuach	Single (never married)	1	Housewife	1	4			12	1	Known Pos on ART	2	1 visit	1	1	At Health Facility	1	Live Birth-LB	1	Already on ART	1	2018-07-16	1f = TDF/3TC/EFV	6		2019-11-10	Pregnant	2020-02-10	92	3-5 months	2	90	90	0	NA	3	NA	3	2020-02-10	0	92
57	IMPORTA-0665	1	2022-08-30	Arach Maker Arach	Rumbek Hospital	2	2019-11-12	20	Malual bab	Single (never married)	1	Housewife	1	2	3		8	1	Known Pos on ART	2	1 visit	1	1	At home	2	Live Birth-LB	1	Already on ART	1		1c = TDF/3TC/DTG	3		2019-11-12	Pregnant	2020-02-12	92	3-5 months	2	90	187	-97	Yes	1	Suppressed	1	2020-05-19	97	189
	IMPORTA-0666	1	2022-08-30	Mawa Mark	Gurei PHCC	1	2019-11-07	20	Malual bab	Single (never married)	1	Housewife	1	5	5	43870	12	1	Known Pos on ART	2	1 visit	1	1	At Health Facility	1	Live Birth-LB	1	Already on ART	1	2017-07-18	1f = TDF/3TC/EFV	6		2017-07-18	Pregnant	2017-08-18	31	<3 months	1	180	180	0	NA	3	NA	3	2019-11-07	811	842
	IMPORTA-0667	1	2022-08-30	Arach Maker Arach	Rumbek Hospital	2	2019-11-04	25	Ager-Uum	Single (never married)	1	Farming	2		3	43891	8	1			2 visits	2	2	At Health Facility	1	Live Birth-LB	1	Already on ART	1	2019-11-04	1c = TDF/3TC/DTG	3		2019-11-04	Pregnant	2020-02-04	92	3-5 months	2	90	90	0	NA	3	NA	3		43865
	IMPORTA-0668	1	2022-08-30	Arach Maker Arach	Rumbek Hospital	2	2019-11-04	30	Pacong	Single (never married)	1	Housewife	1	1	2				Newly tested at ANC	1						Live Birth-LB	1			2019-11-14	1c = TDF/3TC/DTG	3		2019-11-11	Pregnant	2020-02-04	85	<3 months	1	90	90	0	No	2	NA	3		43865
	IMPORTA-0669	1	2022-08-30	Arach Maker Arach	Rumbek Hospital	2	2019-01-04	30		Single (never married)	1	Housewife	1				18	2	Known Pos on ART	2	1 visit	1	1	At Health Facility	1	Live Birth-LB	1			2017-10-12	1f = TDF/3TC/EFV	6		2019-11-04	Pregnant	2020-04-04	152	3-5 months	2	90	90	0	Yes	1	Suppressed	1	2019-02-04	-425
	IMPORTA-0670	1	2022-08-30	Arach Maker Arach	Rumbek Hospital	2	2019-10-31	19	Acuar	Single (never married)	1	Housewife	1	1	2		12	1	Known Pos on ART	2	3 visits	3	3	At home	2	Live Birth-LB	1	Already on ART	1		1f = TDF/3TC/EFV	6		2019-10-31	Pregnant	2020-04-30	182	6+ months	3	180	144	36	Yes	1	Suppressed	1	2020-03-25	-36	146
	IMPORTA-0671	1	2022-08-30	Arach Maker Arach	Rumbek Hospital	2	2019-10-31	22	Malakia	Single (never married)	1	Housewife	1				32	2	Known Pos on ART	2				At Health Facility	1	Live Birth-LB	1	Already on ART	1	2018-06-16	1c = TDF/3TC/DTG	3		2019-10-31	Breastfeeding	2020-01-31	92	3-5 months	2	90	90	0	Yes	1	Suppressed	1	2020-01-30	-1	91
	IMPORTA-0672	1	2022-08-30	Arach Maker Arach	Rumbek Hospital	2	2019-10-31	26	Akual	Single (never married)	1	Housewife	1	3	3		12	1	Known Pos on ART	2	1 visit	1	1	At Health Facility	1	Live Birth-LB	1	Already on ART	1		1c = TDF/3TC/DTG	3		2019-10-31	Breastfeeding	2020-01-31	92	3-5 months	2	90	90	0	Yes	1	Suppressed	1	2020-01-30	-1	91
	IMPORTA-0673	1	2022-08-30	Arach Maker Arach	Rumbek Hospital	2	2019-10-30	31	Malakia	Single (never married)	1	Housewife	1		6		38	2						At Health Facility	1	Live Birth-LB	1	Already on ART	1		1c = TDF/3TC/DTG	3		2019-10-30	Pregnant	2020-01-30	92	3-5 months	2	90	90	0	Yes	1	Suppressed	1	2020-01-30	0	92
	IMPORTA-0675	1	2022-08-30	Arach Maker Arach	Rumbek Hospital	2	2019-10-29	23	Malual kodi	Single (never married)	1	Housewife	1	3	3		38	2	Known Pos on ART	2	2 visits	2	2	At Health Facility	1	Live Birth-LB	1	Already on ART	1		1f = TDF/3TC/EFV	6		2019-10-29	Pregnant	2020-06-13	228	6+ months	3	90	54	36	Yes	1	Suppressed	1	2019-12-13	-183	45
	IMPORTA-0676	1	2022-08-30	Arach Maker Arach	Rumbek Hospital	2	2019-10-29	20		Single (never married)	1			6					Known Pos on ART	2				At home	2			New on ART -- postpartum	2		1f = TDF/3TC/EFV	6		2019-10-29	Breastfeeding	2020-01-29	92	3-5 months	2	90	164	-74	No	2	NA	3		43859
	IMPORTA-0677	1	2022-08-30	Arach Maker Arach	Rumbek Hospital	2	2020-10-22	28	Akual	Single (never married)	1	Housewife	1	6	6		13	1	Known Pos on ART	2	2 visits	2	2	At home	2	Live Birth-LB	1	Already on ART	1	2016-04-05	1f = TDF/3TC/EFV	6		2019-10-22	Pregnant	2020-01-22	92	3-5 months	2	90	90	0	Yes	1	Suppressed	1	2020-01-22	0	92
	IMPORTA-0678	1	2022-09-01	Arach Maker Arach	Rumbek Hospital	2	2021-03-04	30	Malual bab	Single (never married)	1	Housewife	1	3		44409	12	1	Newly tested at ANC	1	1 visit	1	1	At Health Facility	1	Live Birth-LB	1			2021-03-04	1c = TDF/3TC/DTG	3		2021-03-04	Pregnant	2021-09-04	184	6+ months	3	180	199	-19	NA	3	NA	3	2021-09-01	-3	181
	IMPORTA-0679	1	2022-09-01	Arach Maker Arach	Rumbek Hospital	2	2020-08-28	25	Malualakan	Single (never married)	1	Farming	2	4	4	44256			Newly tested at ANC	1	2 visits	2	2	At home	2	Live Birth-LB	1			2020-08-28	1c = TDF/3TC/DTG	3		2020-08-28	Pregnant	2021-02-28	184	6+ months	3	180	180	0	NA	3	NA	3	2021-02-28	0	184
	IMPORTA-0680	1	2022-09-01	Arach Maker Arach	Rumbek Hospital	2	2021-02-26	25	Makuirie	Married Polygamous	2	Housewife	1	2	3		9	1	Known Pos on ART	2	1 visit	1	1	At Health Facility	1	Live Birth-LB	1	Already on ART	1		1c = TDF/3TC/DTG	3		2021-02-26	Breastfeeding	2021-08-26	181	6+ months	3	180	185	-5	Yes	1	Suppressed	1	2021-08-31	5	186
	IMPORTA-0681	1	2022-09-01	Arach Maker Arach	Rumbek Hospital	2	2020-08-27	30	Malual bab	Single (never married)	1	Farming	2	5	6	44317			Newly tested at ANC	1	1 visit	1	1	At home	2	Live Birth-LB	1	New on ART -- in pregnancy	2	2020-08-27	1c = TDF/3TC/DTG	3		2020-08-27	Pregnant	2021-02-27	184	6+ months	3	180	180	0	No	2	NA	3	2021-02-27	0	184
	IMPORTA-0682	1	2022-09-01	Arach Maker Arach	Rumbek Hospital	2	2020-08-05	30	Malual bab	Single (never married)	1			6		44287	38	2	Newly tested at ANC	1				At home	2	Live Birth-LB	1	New on ART -- in pregnancy	2	2020-08-05	1c = TDF/3TC/DTG	3		2020-08-05	Pregnant	2021-02-05	184	6+ months	3	180	180	0	NA	3	NA	3	2021-02-05	0	184
	IMPORTA-0683	1	2022-09-01	Arach Maker Arach	Rumbek Hospital	2	2020-08-04	19	PDU	Single (never married)	1	Farming	2		4		8	1	Newly tested at ANC	1	1 visit	1	1	At home	2	Live Birth-LB	1	New on ART -- in pregnancy	2	2020-08-04	1c = TDF/3TC/DTG	3		2020-08-04	Pregnant	2022-02-04	549	6+ months	3	180	180	0	NA	3	NA	3	2021-04-04	-306	243
	IMPORTA-0684	1	2022-09-01	Arach Maker Arach	Rumbek Hospital	2	2020-08-04	31	Malual Akan	Single (never married)	1	Farming	2	6	6		12	1	Newly tested at ANC	1	1 visit	1	1	At home	2	Live Birth-LB	1	New on ART -- in pregnancy	2	2020-08-04	1a = AZT/3TC+EFV	1		2020-08-04	Pregnant	2021-02-04	184	6+ months	3	180	180	0	No	2	NA	3	2021-02-04	0	184
	IMPORTA-0685	1	2022-09-01	Arach Maker Arach	Rumbek Hospital	2	2021-02-11	30	Malual Kodi	Single (never married)	1	Farming	2	5	5	44256	12	1	Newly tested at ANC	1	1 visit	1	1	At Health Facility	1	Live Birth-LB	1	Already on ART	1	2019-08-07	1c = TDF/3TC/DTG	3		2021-02-01	Pregnant	2021-08-11	191	6+ months	3	180	114	66	Yes	1	Suppressed	1	2021-06-17	-55	136
	IMPORTA-0686	1	2022-09-01	Arach Maker Arach	Rumbek Hospital	2	2021-01-27	37	Akan-alueny	Single (never married)	1	Housewife	1			44409	38	2	Known Pos on ART	2	1 visit	1	1	At Health Facility	1	Live Birth-LB	1	Already on ART	1		1c = TDF/3TC/DTG	3		2021-01-27	Pregnant	2021-07-27	181	6+ months	3	180	200	-20	Yes	1	Suppressed	1	2022-08-16	385	566
	IMPORTA-0687	1	2022-09-01	Arach Maker Arach	Rumbek Hospital	2	2021-01-21	32	Malakia	Single (never married)	1	Housewife	1	2	3	44287	18	2	Newly tested at ANC	1	2 visits	2	2			Live Birth-LB	1	New on ART -- in pregnancy	2	2021-01-21	1c = TDF/3TC/DTG	3		2020-01-21	Pregnant	2021-07-21	547	6+ months	3	180	450	-270	No	2	NA	3		44398
80	IMPORTA-0688	1	2022-09-01	Arach Maker Arach	Rumbek Hospital	2	2021-01-19	31	Pachong	Single (never married)	1	Housewife	1	1			18	2	Newly tested at ANC	1	2 visits	2	2	At Health Facility	1	Live Birth-LB	1	New on ART -- in pregnancy	2	2021-01-19	1c = TDF/3TC/DTG	3		2021-01-19	Pregnant	2021-07-19	181	6+ months	3	180	177	3	NA	3	NA	3	2021-07-16	-3	178
	IMPORTA-0689	1	2022-09-01	Arach Maker Arach	Rumbek Hospital	2	2020-12-17	29	Cuei Arol	Married Polygamous	2	Housewife	1	2	3		14	1	Newly tested at ANC	1	1 visit	1	1	At Health Facility	1			New on ART -- in pregnancy	2	2020-12-17	1c = TDF/3TC/DTG	3		2020-12-17	Pregnant	2021-06-17	182	6+ months	3	180	187	-7	No	2	NA	3	2021-05-24	-24	158
	IMPORTA-0690	1	2022-09-01	Arach Maker Arach	Rumbek Hospital	2	2020-12-21	23	Aduel	Single (never married)	1	Housewife	1	6	7		32	2	Known Pos on ART	2	2 visits	2	2	At home	2	Live Birth-LB	1	Already on ART	1		1c = TDF/3TC/DTG	3		2020-12-21	Breastfeeding	2021-06-21	182	6+ months	3	180	189	-9	Yes	1	Suppressed	1	2021-06-30	9	191
	IMPORTA-0691	1	2022-09-01	Arach Maker Arach	Rumbek Hospital	2		32	Waan	Single (never married)	1	Housewife	1			44409	18	2	Newly tested at ANC	1				At Health Facility	1	Live Birth-LB	1	New on ART -- in pregnancy	2	2020-11-05	1c = TDF/3TC/DTG	3		2021-11-05	Pregnant	2021-05-05				180	200	-20	No	2	NA	3	2021-05-25	20
	IMPORTA-0692	1	2022-09-01	Arach Maker Arach	Rumbek Hospital	2	2020-11-23	34	Makoi	Single (never married)	1	Housewife	1	6	7	44277	14	1	Newly tested at ANC	1	2 visits	2	2	At home	2	Live Birth-LB	1	Already on ART	1		1c = TDF/3TC/DTG	3		2020-11-28	Pregnant	2021-05-21	174	3-5 months	2	180	464	-284	NA	3	NA	3	2022-03-09	292	466
	IMPORTA-0693	1	2022-09-01	Arach Maker Arach	Rumbek Hospital	2	2020-11-06	23	Malual-Kodi	Single (never married)	1	Housewife	1	4	4	44197	28	2	Newly tested at ANC	1	2 visits	2	2	At Health Facility	1	Live Birth-LB	1	New on ART -- in pregnancy	2	2018-10-11	1c = TDF/3TC/DTG	3		2020-11-06	Pregnant	2021-05-06	181	6+ months	3	180	205	-25	Yes	1	Suppressed	1	2021-06-01	26	207
	IMPORTA-0694	1	2022-09-01	Arach Maker Arach	Rumbek Hospital	2	2020-10-27	27	Akot	Single (never married)	1						28	2	Known Pos on ART	2	2 visits	2	2	At Health Facility	1	Live Birth-LB	1	Already on ART	1	2020-10-27	1c = TDF/3TC/DTG	3		2020-10-27	Pregnant	2021-04-27	182	6+ months	3	180	352	-172	Yes	1	Suppressed	1	2021-10-19	175	357
	IMPORTA-0695	1	2022-09-01	Arach Maker Arach	Rumbek Hospital	2	2020-05-17	26	Akuea	Married Monogamous	2	Housewife	1	6	6	44501	12	1	Newly tested at ANC	1				At home	2	Live Birth-LB	1	Already on ART	1	2021-05-17	1c = TDF/3TC/DTG	3		2021-05-17	Pregnant	2021-11-17	184	6+ months	3	180	98	82	Yes	1	Suppressed	1	2021-08-20	-89	95
	IMPORTA-0696	1	2022-09-01	Arach Maker Arach	Rumbek Hospital	2	2021-05-27	45	Abiriu	Single (never married)	1	Housewife	1		3	44531	14	1	Newly tested at ANC	1	1 visit	1	1	At home	2	Live Birth-LB	1	Already on ART	1	2021-05-27	1c = TDF/3TC/DTG	3		2021-05-27	Pregnant	2021-11-27	184	6+ months	3	180	296	-116	NA	3	NA	3	2022-03-23	116	300
	IMPORTA-0698	1	2022-09-01	Arach Maker Arach	Rumbek Hospital	2	2021-05-05	20	Chalak police	Married Polygamous	2	Housewife	1	2		44409			Known Pos on ART	2	2 visits	2	2	At home	2	Live Birth-LB	1	Already on ART	1	2019-04-16	1f = TDF/3TC/EFV	6		2021-05-10	Breastfeeding	2021-10-10	153	3-5 months	2	180	187	-7	Yes	1	Suppressed	1	2021-11-17	38	191
	IMPORTA-0699	1	2022-09-01	Arach Maker Arach	Rumbek Hospital	2	2021-04-08	30	Akual	Single (never married)	1	Housewife	1		3		12	1	Known Pos on ART	2	1 visit	1	1	At Health Facility	1	Live Birth-LB	1	Already on ART	1	2020-02-11	1c = TDF/3TC/DTG	3		2021-04-08	Breastfeeding	2021-10-08	183	6+ months	3	180	170	10	Yes	1	Suppressed	1	2021-09-28	-10	173
	IMPORTA-0700	1	2022-09-01	Arach Maker Arach	Rumbek Hospital	2	2021-04-30	25	Aduel	Single (never married)	1	Housewife	1	2	2				Known Pos on ART	2	2 visits	2	2	At home	2	Live Birth-LB	1	Already on ART	1	2019-06-23	1c = TDF/3TC/DTG	3		2021-04-30	Pregnant	2021-10-30	183	6+ months	3	180	242	-62	Yes	1	Unsuppressed	2	2022-01-03	65	248
	IMPORTA-0701	1	2022-09-01	Arach Maker Arach	Rumbek Hospital	2	2021-04-27	29	Akuach	Single (never married)	1			2	2		8	1	Known Pos on ART	2				At home	2	Live Birth-LB	1	New on ART -- postpartum	2		1c = TDF/3TC/DTG	3		2021-04-27	Breastfeeding	2021-10-27	183	6+ months	3	180	150	30	Yes	1	Suppressed	1	2021-10-06	-21	162
	IMPORTA-0702	1	2022-09-01	Arach Maker Arach	Rumbek Hospital	2	2021-05-05	32	Malakia	Married Monogamous	2	Housewife	1	1		44470	4	1	Newly tested at ANC	1	1 visit	1	1	At home	2	Live Birth-LB	1	New on ART -- in pregnancy	2	2021-05-07	1c = TDF/3TC/DTG	3		2021-05-07	Pregnant	2021-11-07	184	6+ months	3	180	192	-12	Yes	1	Suppressed	1	2021-11-19	12	196
	IMPORTA-0703	1	2022-09-01	Arach Maker Arach	Rumbek Hospital	2	2021-05-03	22	Makurie	Married Monogamous	2	Housewife	1	2	2	44561	12	1	Known Pos on ART	2	1 visit	1	1	At home	2	Live Birth-LB	1	Already on ART	1	2020-06-17	1c = TDF/3TC/DTG	3		2021-05-03	Pregnant	2021-11-03	184	6+ months	3	180	277	-97	NA	3	NA	3	2022-02-02	91	275
	IMPORTA-0704	1	2022-09-01	Arach Maker Arach	Rumbek Hospital	2	2021-03-23	23	Akuach	Single (never married)	1	Housewife	1	3	4	44441	8	1	Known Pos on ART	2	3 visits	3	3	At home	2	Live Birth-LB	1	Already on ART	1		1c = TDF/3TC/DTG	3		2021-03-23	Pregnant	2021-09-23	184	6+ months	3	180	187	-7	Yes	1	Suppressed	1	2021-10-01	8	192
	IMPORTA-0705	1	2022-09-01	Arach Maker Arach	Rumbek Hospital	2	2021-08-15	26	Nyotik-anguish	Single (never married)	1	Housewife	1	5	6	44538	24	2	Known Pos on ART	2	1 visit	1	1	At Health Facility	1	Live Birth-LB	1	Already on ART	1	2020-08-14	1c = TDF/3TC/DTG	3		2021-08-15	Pregnant	2022-02-15	184	6+ months	3	180	197	-17	Yes	1	Suppressed	1	2022-03-04	17	201
	IMPORTA-0706	1	2022-09-01	Arach Maker Arach	Rumbek Hospital	2	2021-08-05	30	Akuach	Single (never married)	1	Housewife	1	2	3	44516	38	2	Newly tested at ANC	1	2 visits	2	2	At Health Facility	1	Live Birth-LB	1	New on ART -- in pregnancy	2	2021-08-05	1c = TDF/3TC/DTG	3		2022-08-05	Pregnant	2022-02-05				180	182	-2	NA	3	NA	3	2022-08-08	184	3
	IMPORTA-0707	1	2022-09-01	Arach Maker Arach	Rumbek Hospital	2	2021-08-04	26	Malakia	Married Polygamous	2			2		44471	28	2	Newly tested at ANC	1	3 visits	3	3	At Health Facility	1			New on ART -- in pregnancy	2	2021-08-04	1c = TDF/3TC/DTG	3		2021-08-04	Pregnant	2022-02-04	184	6+ months	3	180	178	2	Yes	1	Suppressed	1	2022-02-08	4	188
	IMPORTA-0708	1	2022-09-01	Arach Maker Arach	Rumbek Hospital	2	2021-08-04	37	Akuach	Single (never married)	1	Housewife	1	3	3	44511			Known Pos on ART	2	3 visits	3	3	At Health Facility	1	Live Birth-LB	1	Already on ART	1	2021-04-16	1c = TDF/3TC/DTG	3		2021-08-04	Pregnant	2022-02-04	184	6+ months	3	180	72	108	Yes	1	Suppressed	1	2021-10-16	-111	73
	IMPORTA-0709	1	2022-09-01	Arach Maker Arach	Rumbek Hospital	2	2021-08-03	24	Malith	Single (never married)	1	Housewife	1		4	44593			Newly tested at ANC	1	2 visits	2	2			Live Birth-LB	1			2021-08-03	1c = TDF/3TC/DTG	3		2021-08-03	Pregnant	2022-02-03	184	6+ months	3	180	159	21	NA	3	NA	3	2022-01-13	-21	163
101	IMPORTA-0710	1	2022-09-01	Arach Maker Arach	Rumbek Hospital	2	2021-07-28	34		Single (never married)	1	Housewife	1	2			38	2	Newly tested at ANC	1	1 visit	1	1	At home	2	Live Birth-LB	1	New on ART -- in pregnancy	2	2021-07-28	1c = TDF/3TC/DTG	3		2021-08-28	Breastfeeding	2022-01-28	153	3-5 months	2	180	176	4	NA	3	NA	3	2022-01-01	-27	126
102	IMPORTA-0711	1	2022-09-01	Arach Maker Arach	Rumbek Hospital	2	2021-07-29	23	Adol Aduel	Single (never married)	1	Housewife	1	3	3		28	2	Newly tested at ANC	1				At home	2	Live Birth-LB	1	New on ART -- postpartum	2	2021-07-29	1c = TDF/3TC/DTG	3		2021-07-29	Breastfeeding	2022-06-23	329	6+ months	3	180	225	-45	NA	3	NA	3	2022-03-16	-99	230
	IMPORTA-0712	1	2022-09-01	Arach Maker Arach	Rumbek Hospital	2	2021-06-16	30	Malakia	Single (never married)	1	Housewife	1	2	2		38	2	Known Pos not on ART	2				At Health Facility	1	Live Birth-LB	1	New on ART -- postpartum	2	2021-06-16	1c = TDF/3TC/DTG	3		2021-06-16	Breastfeeding	2021-11-16	153	3-5 months	2	180	186	-6	No	2	NA	3	2021-12-04	18	171
	IMPORTA-0713	1	2022-09-01	Arach Maker Arach	Rumbek Hospital	2	2021-06-11	27	Akoi Ayang	Single (never married)	1	Housewife	1	1			12	1	Known Pos on ART	2	3 visits	3	3	At home	2	Live Birth-LB	1	Already on ART	1	2021-06-16	1c = TDF/3TC/DTG	3		2021-06-16	Breastfeeding	2021-12-11	178	3-5 months	2	180	147	33	Yes	1	Suppressed	1	2021-11-08	-33	145
	IMPORTA-0714	1	2022-09-01	Arach Maker Arach	Rumbek Hospital	2	2021-06-15	30	Malith	Single (never married)	1	Farming	2			44440			Newly tested at ANC	1	1 visit	1	1	At home	2	Live Birth-LB	1	Already on ART	1	2021-06-15	1c = TDF/3TC/DTG	3		2021-06-15	Pregnant	2021-12-15	183	6+ months	3	180	182	-2	NA	3	NA	3	2021-12-17	2	185
	IMPORTA-0715	1	2022-09-01	Arach Maker Arach	Rumbek Hospital	2	2021-06-10	16	Malual Bab	Single (never married)	1	Housewife	1	1	2	44531			Newly tested at ANC	1	2 visits	2	2	At Health Facility	1	Live Birth-LB	1	Already on ART	1	2021-06-10	1c = TDF/3TC/DTG	3		2021-06-10	Pregnant	2021-12-10	183	6+ months	3	180	147	33	NA	3	NA	3	2021-11-07	-33	150
	IMPORTA-0716	1	2022-09-01	Arach Maker Arach	Rumbek Hospital	2	2021-05-31	30	Mabor-Ngap	Married Polygamous	2	Housewife	1	3	4	44542	16	2	Known Pos on ART	2				At home	2	Live Birth-LB	1	Already on ART	1	2017-02-27	1c = TDF/3TC/DTG	3		2021-05-03	Pregnant	2021-11-30	211	6+ months	3	180	180	0	Yes	1	Suppressed	1	2021-11-30	0	211
	IMPORTA-0717	1	2022-09-01	Arach Maker Arach	Rumbek Hospital	2	2020-10-27	25	Malual bab	Single (never married)	1	Housewife	1	4		44228	13	1	Known Pos on ART	2	1 visit	1	1	At Health Facility	1	Live Birth-LB	1	Already on ART	1	2020-05-18	1c = TDF/3TC/DTG	3		2020-10-27	Pregnant	2021-04-27	182	6+ months	3	180	429	-249	Yes	1	Suppressed	1		44313
	IMPORTA-0718	1	2022-09-01	Arach Maker Arach	Rumbek Hospital	2	2021-05-31	27	Maloui	Single (never married)	1	Housewife	1	5	5	44501			Newly tested at ANC	1	1 visit	1	1	At home	2	Live Birth-LB	1	New on ART -- in pregnancy	2	2021-05-31	1c = TDF/3TC/DTG	3		2021-05-31	Pregnant	2021-12-01	184	6+ months	3	180	292	-112	NA	3	NA	3		44531
	IMPORTA-0719	1	2022-08-30	Lodu Moses Wole	Nyong PHCC	3	2019-10-01	20	Hai Gwanya	Married Polygamous	2	Housewife	1	3	3	43873	20	2	Newly tested at ANC	1	2 visits	2	2	At Health Facility	1	Live Birth-LB	1	New on ART -- in pregnancy	2	2019-09-30	1c = TDF/3TC/DTG	3		2019-09-30	Pregnant	2020-01-01	93	3-5 months	2	90	90	0	Yes	1	Suppressed	1	2020-01-12	11	104
	IMPORTA-0720	1	2022-09-01	Lodu Moses Wole	Nyong PHCC	3	2019-12-02	18	Hai Askal	Married Monogamous	2	Housewife	1	5	1	43938			Known Pos not on ART	2	4 or more visits	4	3	At Health Facility	1	Live Birth-LB	1	Already on ART	1	2019-04-09	1f = TDF/3TC/EFV	6		2019-04-09	Pregnant	2019-05-08	29	<3 months	1	30	30	0	Yes	1	Unsuppressed	2	2019-05-09	1	30
	IMPORTA-0721	1	2022-09-01	Lodu Moses Wole	Nyong PHCC	3	2019-07-29	30	Hai Malakia	Married Monogamous	2	Housewife	1		1		11	1	Newly tested at ANC	1	3 visits	3	3	At Health Facility	1	Live Birth-LB	1	New on ART -- in pregnancy	2	2019-07-29	1c = TDF/3TC/DTG	3		2019-07-29	Pregnant	2019-08-27	29	<3 months	1	30	30	0	Yes	1	Suppressed	1	2019-08-27	0	29
	IMPORTA-0722	1	2022-09-01	Lodu Moses Wole	Nyong PHCC	3	2019-12-09	35	Hai Gumbo	Married Monogamous	2	Housewife	1	3	3				Newly tested at ANC	1	1 visit	1	1	At home	2	Live Birth-LB	1	New on ART -- postpartum	2	2019-12-09	1c = TDF/3TC/DTG	3		2019-12-09	Pregnant	2020-03-09	91	3-5 months	2	90	90	0	Yes	1	Suppressed	1	2020-05-22	74	165
	IMPORTA-0723	1	2022-09-01	Lodu Moses Wole	Nyong PHCC	3	2019-12-11	22	Hai Angaur	Married Monogamous	2	Unemployed	1		1	43958			Newly tested at ANC	1				At Health Facility	1	Live Birth-LB	1	New on ART -- in pregnancy	2	2019-12-10	1c = TDF/3TC/DTG	3		2019-12-10	Pregnant	2020-03-10	91	3-5 months	2	90	90	0	Yes	1	Suppressed	1	2020-03-20	10	101
	IMPORTA-0724	1	2022-09-01	Lodu Moses Wole	Nyong PHCC	3	2020-01-07	24	Hai Korton	Married Monogamous	2	Housewife	1	2	4	43981	18	2	Newly tested at ANC	1	2 visits	2	2	At Health Facility	1	Live Birth-LB	1	New on ART -- in pregnancy	2		1f = TDF/3TC/EFV	6		2020-01-07	Pregnant	2020-03-06	59	<3 months	1	90	90	0	Yes	1	Suppressed	1	2020-03-06	0	59
	IMPORTA-0725	1	2022-09-01	Lodu Moses Wole	Nyong PHCC	3	2020-05-21	35	Hai Malakia	Married Monogamous	2	Housewife	1		3	44087	24	2	Newly tested at ANC	1	1 visit	1	1	At Health Facility	1	Live Birth-LB	1	New on ART -- in pregnancy	2	2020-05-21	1c = TDF/3TC/DTG	3		2020-05-21	Pregnant	2020-11-20	183	6+ months	3	180	180	0	Yes	1	Suppressed	1	2020-11-20	0	183
	IMPORTA-0726	1	2022-09-01	Lodu Moses Wole	Nyong PHCC	3	2020-06-19	23	Hai Gwanya	Single (never married)	1	Unemployed	1	2	1	44202			Newly tested at ANC	1				At Health Facility	1	Live Birth-LB	1	New on ART -- in pregnancy	2		1c = TDF/3TC/DTG	3		2020-06-19	Pregnant	2020-12-19	183	6+ months	3	180	180	0	Yes	1	Suppressed	1	2020-12-19	0	183
	IMPORTA-0727	1	2022-10-01	Lodu Moses Wole	Nyong PHCC	3	2020-07-27	26	Ifwotu	Married Polygamous	2	Housewife	1	3	3	44220	12	1	Newly tested at ANC	1	2 visits	2	2	At home	2	Neonatal Death-ND	3	New on ART -- in pregnancy	2	2020-07-27	1c = TDF/3TC/DTG	3		2020-07-27	Pregnant	2021-01-27	184	6+ months	3	180	180	0	Yes	1	Suppressed	1	2021-03-19	51	235
	IMPORTA-0728	1	2022-09-01	Lodu Moses Wole	Nyong PHCC	3	2020-10-26	22	Ifwanyak	Married Monogamous	2	Salaried Employee	2	1	2	44256	20	2	Known Pos on ART	2	1 visit	1	1	At Health Facility	1	Live Birth-LB	1	Already on ART	1	2019-03-30	1c = TDF/3TC/DTG	3		2020-07-20	Pregnant	2021-01-20	184	6+ months	3	180	180	0	Yes	1	Suppressed	1	2021-02-25	36	220
	IMPORTA-0729	1	2022-09-01	Lodu Moses Wole	Nyong PHCC	3	2020-11-02	30	Islak	Married Monogamous	2	Housewife	1	2	3	44197			Known Pos on ART	2	1 visit	1	1	At home	2	Live Birth-LB	1	Already on ART	1	2017-06-26	1c = TDF/3TC/DTG	3		2021-01-07	Pregnant	2021-07-07	181	6+ months	3	180	180	0	Yes	1	Suppressed	1	2021-07-13	6	187
	IMPORTA-0730	1	2022-09-01	Lodu Moses Wole	Nyong PHCC	3	2021-01-19	19	Hai Inkas	Married Monogamous	2	Housewife	1	2	3	44390	36	2	Newly tested at ANC	1				At Health Facility	1	Live Birth-LB	1	New on ART -- in pregnancy	2	2021-01-19	1c = TDF/3TC/DTG	3		2021-01-19	Pregnant	2021-04-19	90	3-5 months	2	9	90	-81	Yes	1	Suppressed	1	2021-04-19	0	90
	IMPORTA-0731	1	2022-09-01	Lodu Moses Wole	Nyong PHCC	3	2021-02-01	30	Hai Longute	Married Monogamous	2	Housewife	1	3	3		32	2	Breastfeeding	1	2 visits	2	2	At home	2	Live Birth-LB	1	New on ART -- postpartum	2		1c = TDF/3TC/DTG	3		2021-02-05	Breastfeeding	2021-08-02	178	3-5 months	2	180	180	0	Yes	1	Suppressed	1	2021-08-02	0	178
	IMPORTA-0732	1	2022-09-01	Lodu Moses Wole	Nyong PHCC	3	2021-03-01	20	Ilugum	Married Monogamous	2	Unemployed	1	1	2	44471	8	1	Known Pos on ART	2	1 visit	1	1	At Health Facility	1	Live Birth-LB	1	Already on ART	1	2019-03-05	1c = TDF/3TC/DTG	3		2020-12-17	Pregnant	2021-06-17	182	6+ months	3	180	180	0	Yes	1	Suppressed	1	2021-06-17	0	182
	IMPORTA-0733	1	2022-09-01	Lodu Moses Wole	Nyong PHCC	3	2021-03-01	25	Lopa	Married Monogamous	2	Housewife	1	2	3				Newly tested at ANC	1	1 visit	1	1	At Health Facility	1	Live Birth-LB	1	New on ART -- postpartum	2	2021-03-20	1c = TDF/3TC/DTG	3		2021-03-20	Breastfeeding	2021-09-20	184	6+ months	3	180	180	0	Yes	1	Suppressed	1	2021-03-20	-184	0
	IMPORTA-0734	1	2022-09-01	Lodu Moses Wole	Nyong PHCC	3	2021-03-24	24	Hai Matara	Divorced/separated	3	Unemployed	1	3	3		8	1	Newly tested at ANC	1	1 visit	1	1	At Health Facility	1	Live Birth-LB	1	New on ART -- postpartum	2	2021-03-24	1c = TDF/3TC/DTG	3		2021-03-24	Breastfeeding	2021-09-24	184	6+ months	3	180	180	0	Yes	1	Suppressed	1	2021-09-16	-8	176
	IMPORTA-0735	1	2021-04-12	Lodu Moses Wole	Nyong PHCC	3	2021-04-12	26	Hai Islak	Married Monogamous	2	Housewife	1		3	44378	32	2	Known Pos on ART	2	2 visits	2	2	At home	2	Live Birth-LB	1	Already on ART	1	2021-04-12	1c = TDF/3TC/DTG	3		2019-07-04	Pregnant	2019-08-02	29	<3 months	1	30	30	0	Yes	1	Suppressed	1	2019-08-26	24	53
	IMPORTA-0736	1	2022-09-01	Lodu Moses Wole	Nyong PHCC	3	2021-04-30	30	Ilugum	Married Monogamous	2	Housewife	1	3	3		8	1	Newly tested at ANC	1	1 visit	1	1	At Health Facility	1	Live Birth-LB	1	New on ART -- postpartum	2		1c = TDF/3TC/DTG	3		2021-04-30	Pregnant	2021-10-29	182	6+ months	3	180	180	0	Yes	1	Suppressed	1	2021-10-29	0	182
	IMPORTA-0737	1	2022-09-01	Lodu Moses Wole	Nyong PHCC	3	2021-04-13	18	Omolika Market	Married Monogamous	2	Housewife	1	2	1		28	2	Newly tested at ANC	1				At Health Facility	1	Live Birth-LB	1	New on ART -- in pregnancy	2	2021-04-13	1c = TDF/3TC/DTG	3		2021-04-13	Pregnant	2021-10-13	183	6+ months	3	180	180	0	Yes	1	Suppressed	1	2021-09-13	-30	153
	IMPORTA-0738	1	2022-09-01	Lodu Moses Wole	Nyong PHCC	3	2021-06-16	28	Hai Lotuko	Married Monogamous	2	Housewife	1		2		8	1	Known Pos on ART	2	2 visits	2	2	At home	2	Live Birth-LB	1	Already on ART	1	2021-06-14	1c = TDF/3TC/DTG	3		2021-06-14	Pregnant	2021-12-14	183	6+ months	3	180	180	0	Yes	1	Suppressed	1	2021-11-14	-30	153
	IMPORTA-0739	1	2022-09-01	Lodu Moses Wole	Nyong PHCC	3	2021-06-18	28	Hai Matara	Married Monogamous	2	Housewife	1	3	3	44400	38	2	Known Pos on ART	2	2 visits	2	2	At Health Facility	1	Live Birth-LB	1	New on ART -- in pregnancy	2	2019-02-04	1c = TDF/3TC/DTG	3		2020-02-23	Pregnant	2020-08-23	182	6+ months	3	180	180	0	Yes	1	Suppressed	1	2020-08-23	0	182
	IMPORTA-0740	1	2022-09-01	Lodu Moses Wole	Nyong PHCC	3	2021-09-20	29	Ilangi	Married Polygamous	2	Business (Man/Women)/trader	2		3	44667			Known Pos on ART	2	4 or more visits	4	3	At Health Facility	1	Live Birth-LB	1	Already on ART	1	2017-05-15	1c = TDF/3TC/DTG	3		2021-08-02	Pregnant	2022-02-02	184	6+ months	3	180	180	0	Yes	1	Suppressed	1	2022-02-02	0	184
	IMPORTA-0741	1	2022-09-01	Lodu Moses Wole	Nyong PHCC	3	2021-11-04	36		Married Monogamous	2	Housewife	1	3	3	44685	36	2	Newly tested at ANC	1				At Health Facility	1	Live Birth-LB	1	New on ART -- in pregnancy	2	2021-11-04	1c = TDF/3TC/DTG	3		2021-11-04	Pregnant	2022-05-04	181	6+ months	3	180	180	0	Yes	1	Suppressed	1	2022-05-04	0	181
	IMPORTA-0742	1	2022-09-01	Lodu Moses Wole	Nyong PHCC	3		25	Hai Battery	Married Monogamous	2	Housewife	1	2	3	44656	18	2	Known Pos on ART	2	4 or more visits	4	3	At Health Facility	1	Live Birth-LB	1	Already on ART	1	2019-03-23	1c = TDF/3TC/DTG	3		2021-03-23	Pregnant	2021-09-23	184	6+ months	3	180	180	0	Yes	1	Suppressed	1		44462
	IMPORTA-0743	1	2022-09-01	Lodu Moses Wole	Nyong PHCC	3	2021-11-19	21	Dumarm	Married Monogamous	2	Housewife	1	2	3	44682	9	1	Known Pos on ART	2	3 visits	3	3	At Health Facility	1	Live Birth-LB	1	Already on ART	1		1c = TDF/3TC/DTG	3		2021-08-02	Pregnant	2022-02-02	184	6+ months	3	180	180	0	Yes	1	Suppressed	1	2022-02-02	0	184
	IMPORTA-0744	1	2022-09-01	Lodu Moses Wole	Nyong PHCC	3	2021-11-24	28	Inkas	Married Polygamous	2	Business (Man/Women)/trader	2	1	2	44684	12	1	Known Pos on ART	2				At Health Facility	1	Live Birth-LB	1	New on ART -- in pregnancy	2	2017-07-13	1c = TDF/3TC/DTG	3			Pregnant	2022-02-17	44609	6+ months	3	180	180	0	Yes	1	Suppressed	1	2022-08-16	180	44789
	IMPORTA-0745	1	2022-09-01	Lodu Moses Wole	Nyong PHCC	3	2021-11-24	30	Hai	Divorced/separated	3	Unemployed	1	2	3	44617	19	2	Newly tested at ANC	1	2 visits	2	2	At Health Facility	1	Live Birth-LB	1	Already on ART	1	2021-11-24	1c = TDF/3TC/DTG	3		2021-11-24	Pregnant	2022-05-24	181	6+ months	3	180	180	0	Yes	1	Unsuppressed	2	2022-05-24	0	181
	IMPORTA-0748	1	2022-09-01	Arach Maker Arach	Rumbek Hospital	2	2022-01-18	26	Aduel	Married Polygamous	2	Housewife	1	5	5	44743			Known Pos on ART	2				At Health Facility	1			Already on ART	1	2018-05-16	1c = TDF/3TC/DTG	3		2022-01-18	Pregnant	2022-07-18	181	6+ months	3	180	180	0	NA	3	NA	3		44760
	IMPORTA-0749	1	2022-09-02	Arach Maker Arach	Rumbek Hospital	2	2021-09-17	36	Malual kodi	Single (never married)	1	Housewife	1	6	6		18	2	Known Pos not on ART	2	3 visits	3	3	At Health Facility	1	Live Birth-LB	1	Already on ART	1	2022-01-17	1c = TDF/3TC/DTG	3		2022-01-17	Pregnant	2022-07-17	181	6+ months	3	180	196	-16	NA	3	NA	3		44759
	IMPORTA-0750	1	2022-09-02	Arach Maker Arach	Rumbek Hospital	2	2021-12-28	19	Akuach	Single (never married)	1	Housewife	1	6		44287	20	2	Known Pos on ART	2	1 visit	1	1	At Health Facility	1	Live Birth-LB	1	Already on ART	1	2021-04-20	1c = TDF/3TC/DTG	3		2021-12-28	Pregnant	2022-06-28	182	6+ months	3	180	135	45	Yes	1	Suppressed	1		44740
1	IMPORTA-0751	1	2022-08-29	Jessry Pasquali	Yambio Hospital	2		24	Akorobodi	Single (never married)	1	Unemployed	1	2	2		32	2	Breastfeeding	1	2 visits	2	2	At Health Facility	1	Live Birth-LB	1	New on ART -- postpartum	2	2019-10-28	1c = TDF/3TC/DTG	3		2019-10-28	Breastfeeding	2019-11-28	31	<3 months	1	30	30	0	NA	3	NA	3	2019-11-11	-17	14
2	IMPORTA-0752	1	2022-08-29	Jessry Pasquali	Yambio Hospital	2	2019-11-06	19	Napere	Single (never married)	1	Housewife	1		1	43949			Newly tested at ANC	1	1 visit	1	1	At home	2	Live Birth-LB	1	New on ART -- in pregnancy	2	2019-11-06	1c = TDF/3TC/DTG	3		2019-11-06	Pregnant	2019-12-06	30	<3 months	1	30	30	0	NA	3	NA	3	2019-12-06	0	30
3	IMPORTA-0753	1	2022-08-29	Jessry Pasquali	Yambio Hospital	2	2019-10-22	30	Naduru	Single (never married)	1	Unemployed	1		2	43932	8	1	Newly tested at ANC	1	1 visit	1	1	At Health Facility	1	Live Birth-LB	1	New on ART -- in pregnancy	2	2019-10-22	1c = TDF/3TC/DTG	3		2019-10-22	Pregnant	2019-11-22	31	<3 months	1	30	30	0	NA	3	NA	3	2019-11-20	-2	29
4	IMPORTA-0754	1	2022-08-29	Jessry Pasquali	Yambio Hospital	2		24	kuzee			Unemployed	1				8	1	Breastfeeding	1	2 visits	2	2	At home	2	Live Birth-LB	1	New on ART -- postpartum	2	2019-11-04	1c = TDF/3TC/DTG	3		2019-11-04	Breastfeeding	2019-12-04	30	<3 months	1	30	30	0	NA	3	NA	3	2020-01-13	40	70
5	IMPORTA-0755	1	2022-08-29	Jessry Pasquali	Yambio Hospital	2	2019-12-16	35	Hai kokora	Married Monogamous	2	Housewife	1	3	3	43868			Newly tested at ANC	1				At Health Facility	1	Live Birth-LB	1	New on ART -- in pregnancy	2	2019-12-16	1c = TDF/3TC/DTG	3		2019-12-16	Pregnant	2020-01-16	31	<3 months	1	30	30	0	NA	3	NA	3	2019-11-15	-62
6	IMPORTA-0756	1	2022-08-29	Jessry Pasquali	Yambio Hospital	2	2020-01-21	21	zambago	Married Monogamous	2	Housewife	1			44081	8	1	Newly tested at ANC	1				At Health Facility	1	Live Birth-LB	1	New on ART -- in pregnancy	2	2020-01-21	1c = TDF/3TC/DTG	3		2020-01-21	Pregnant	2020-02-21	31	<3 months	1	30	30	0	NA	3	NA	3	2020-02-06	-15	16
7	IMPORTA-0757	1	2022-08-29	Jessry Pasquali	Yambio Hospital	2	2020-01-23	23	Nagori	Married Monogamous	2	Housewife	1		3		34	2	Newly tested at ANC	1	1 visit	1	1	At Health Facility	1	Live Birth-LB	1	New on ART -- in pregnancy	2	2020-01-23	1c = TDF/3TC/DTG	3		2020-01-23	Pregnant	2020-02-24	32	<3 months	1	30	30	0	NA	3	NA	3	2020-02-03	-21	11
9	IMPORTA-0759	1	2022-08-29	Jessry Pasquali	Yambio Hospital	2	2020-01-31	31	Akorogbodi			Other Uniformed forces (Police, Wildlife, Prisons, Fire Brigade)	2		3	44003	16	2	Newly tested at ANC	1	1 visit	1	1	At Health Facility	1	Live Birth-LB	1	New on ART -- in pregnancy	2	2020-01-31	1c = TDF/3TC/DTG	3		2020-01-31	Pregnant	2020-02-29	29	<3 months	1	30	30	0	NA	3	NA	3	2020-02-28	-1	28
10	IMPORTA-0760	1	2022-08-29	Jessry Pasquali	Yambio Hospital	2	2020-02-12	16	Hai kisanga	Single (never married)	1	All other professions	2	2	1		28	2	Newly tested at ANC	1	1 visit	1	1	At home	2	Live Birth-LB	1	New on ART -- in pregnancy	2	2020-02-12	1c = TDF/3TC/DTG	3		2020-02-12	Pregnant	2020-03-12	29	<3 months	1	30	30	0	NA	3	NA	3	2020-08-10	151	180
11	IMPORTA-0761	1	2022-08-29	Jessry Pasquali	Yambio Hospital	2	2020-02-17	24	Hai Tarawa	Married Polygamous	2	Housewife	1	2	3	44096	8	1	Newly tested at ANC	1	1 visit	1	1	At Health Facility	1	Live Birth-LB	1	New on ART -- in pregnancy	2	2020-02-17	1c = TDF/3TC/DTG	3		2020-02-17	Pregnant	2020-03-13	25	<3 months	1	30	30	0	NA	3	NA	3	2020-05-09	57	82
12	IMPORTA-0762	1	2022-08-29	Jessry Pasquali	Yambio Hospital	2	2020-02-20	18	Hai kuba	Single (never married)	1	Unemployed	1	2	1	43994	20	2	Newly tested at ANC	1	1 visit	1	1	At Health Facility	1	Live Birth-LB	1	New on ART -- in pregnancy	2	2020-02-20	1c = TDF/3TC/DTG	3		2020-02-20	Pregnant	2020-03-20	29	<3 months	1	30	38	-8	NA	3	NA	3	2020-05-05	46	75
13	IMPORTA-0763	1	2022-08-29	Jessry Pasquali	Yambio Hospital	2	2020-03-16	16	Nagori	Single (never married)	1	Farming	2	2	3	44034	24	2	Newly tested at ANC	1	1 visit	1	1	At home	2	Live Birth-LB	1			2020-03-16	1c = TDF/3TC/DTG	3		2020-03-16	Pregnant	2019-04-16				30	30	0	NA	3	NA	3	2020-04-16	366	31
14	IMPORTA-0764	1	2022-08-29	Jessry Pasquali	Yambio Hospital	2	2020-03-19	32	mukongo	Married Monogamous	2	Housewife	1		3		21	2	Newly tested at ANC	1	1 visit	1	1	At Health Facility	1	Live Birth-LB	1	New on ART -- in pregnancy	2	2020-03-19	1c = TDF/3TC/DTG	3		2020-03-19	Pregnant	2020-04-20	32	<3 months	1	30	30	0	NA	3	NA	3	2020-03-30	-21	11
15	IMPORTA-0765	1	2022-08-29	Jessry Pasquali	Yambio Hospital	2	2020-04-15	27	kuzee	Single (never married)	1	Unemployed	1		2	44016	8	1	Newly tested at ANC	1	2 visits	2	2	At Health Facility	1	Live Birth-LB	1	New on ART -- in pregnancy	2	2020-04-15	1c = TDF/3TC/DTG	3		2020-04-15	Pregnant	2020-10-15	183	6+ months	3	180	180	0	NA	3	NA	3		44119
16	IMPORTA-0766	1	2022-08-29	Jessry Pasquali	Yambio Hospital	2	2020-04-22	20	Hai Stadium	Single (never married)	1	Housewife	1	3	4		16	2	Newly tested at ANC	1				At Health Facility	1	Live Birth-LB	1	New on ART -- in pregnancy	2	2020-04-22	1c = TDF/3TC/DTG	3		2020-04-22	Pregnant	2020-10-22	183	6+ months	3	180	180	0	NA	3	NA	3		44126
17	IMPORTA-0767	1	2022-08-29	Jessry Pasquali	Yambio Hospital	2	2020-04-03	31		Single (never married)	1	Housewife	1						Newly tested at ANC	1				At home	2	Live Birth-LB	1	New on ART -- postpartum	2	2020-04-03	1c = TDF/3TC/DTG	3		2020-04-03	Pregnant	2020-07-03	91	3-5 months	2	90	90	0	NA	3	NA	3	2020-09-02	61	152
18	IMPORTA-0768	1	2022-08-30	Jessry Pasquali	Yambio Hospital	2	2020-06-11	21	mamenze	Married Monogamous	2	Farming	2	3		44095	28	2	Newly tested at ANC	1	1 visit	1	1	At Health Facility	1	Live Birth-LB	1	New on ART -- in pregnancy	2		1c = TDF/3TC/DTG	3		2020-06-11	Pregnant	2020-12-11	183	6+ months	3	180	180	0	No	2	NA	3	2020-11-13	-28	155
19	IMPORTA-0769	1	2022-08-30	Jessry Pasquali	Yambio Hospital	2		29	duduma	Divorced/separated	3	Farming	2		3				Breastfeeding	1				At Health Facility	1	Live Birth-LB	1	New on ART -- postpartum	2		1c = TDF/3TC/DTG	3		2020-07-14	Breastfeeding	2020-07-14	0	<3 months	1	180	180	0	No	2	NA	3	2020-11-23	132	132
20	IMPORTA-0770	1	2022-08-30	Jessry Pasquali	Yambio Hospital	2	2020-07-16	31	napere	Married Monogamous	2	Unemployed	1	3	3	44218	18	2	Newly tested at ANC	1	2 visits	2	2	At Health Facility	1	Live Birth-LB	1	New on ART -- in pregnancy	2		1c = TDF/3TC/DTG	3		2020-07-16	Pregnant	2020-01-15				180	180	0	Yes	1	Suppressed	1	2020-11-11	301	118
21	IMPORTA-0771	1	2022-08-30	Jessry Pasquali	Yambio Hospital	2	2020-08-27	18	ikpiro	Married Monogamous	2	Housewife	1	2		44187	20	2	Newly tested at ANC	1	1 visit	1	1	At home	2	Live Birth-LB	1	Already on ART	1	2020-08-27	1c = TDF/3TC/DTG	3		2020-08-27	Pregnant	2021-02-26	183	6+ months	3	180	180	0	No	2	NA	3	2021-02-25	-1	182
22	IMPORTA-0772	1	2022-08-30	Jessry Pasquali	Yambio Hospital	2	2020-09-08	35	makpara	Single (never married)	1	Farming	2	3	3	44354			Newly tested at ANC	1	2 visits	2	2	At home	2	Live Birth-LB	1	New on ART -- in pregnancy	2		1c = TDF/3TC/DTG	3		2020-09-08	Pregnant	2021-03-08	181	6+ months	3	180	180	0	Yes	1	Unsuppressed	2	2021-07-02	116	297
23	IMPORTA-0773	1	2022-08-30	Jessry Pasquali	Yambio Hospital	2	2020-09-15	17	azaza	Married Monogamous	2	Farming	2	2	1	43832	20	2	Newly tested at ANC	1	2 visits	2	2	At home	2	Live Birth-LB	1	New on ART -- in pregnancy	2	2020-09-15	1c = TDF/3TC/DTG	3		2020-09-15	Pregnant	2021-03-15	181	6+ months	3	180	180	0	Yes	1	Suppressed	1	2021-02-22	-21	160
24	IMPORTA-0774	1	2022-08-30	Jessry Pasquali	Yambio Hospital	2	2020-09-25	20	kuzze	Single (never married)	1	Business (Man/Women)/trader	2	1	2	44308	8	1	Newly tested at ANC	1	1 visit	1	1	At home	2	Still Birth-MSB or FSB	2	New on ART -- in pregnancy	2	2020-09-25	1c = TDF/3TC/DTG	3		2020-09-25	Pregnant	2021-03-25	181	6+ months	3	180	180	0	Yes	1	Suppressed	1	2021-09-25	184	365
25	IMPORTA-0775	1	2022-08-30	Jessry Pasquali	Yambio Hospital	2	2020-10-09	24	kpirabe	Single (never married)	1	Unemployed	1	1	3	44235	20	2	Newly tested at ANC	1	3 visits	3	3	At Health Facility	1	Live Birth-LB	1	New on ART -- in pregnancy	2		1c = TDF/3TC/DTG	3		2020-10-09	Pregnant	2021-04-09	182	6+ months	3	180	180	0	Yes	1	Suppressed	1		44295
26	IMPORTA-0776	1	2022-08-30	Jessry Pasquali	Yambio Hospital	2	2020-11-09	20	asanza	Married Monogamous	2	Farming	2	1	2		20	2	Newly tested at ANC	1	1 visit	1	1	At home	2	Live Birth-LB	1	New on ART -- in pregnancy	2	2020-11-09	1c = TDF/3TC/DTG	3		2020-11-09	Pregnant	2021-05-10	182	6+ months	3	180	180	0	Yes	1	Suppressed	1	2021-03-11	-60	122
27	IMPORTA-0777	1	2022-08-30	Jessry Pasquali	Yambio Hospital	2	2020-11-30	23	kpirabe			Business (Man/Women)/trader	2	1	2	44246			Newly tested at ANC	1	4 or more visits	4	3	At Health Facility	1	Live Birth-LB	1	New on ART -- in pregnancy	2		1c = TDF/3TC/DTG	3		2020-11-30	Pregnant	2021-05-31	182	6+ months	3	180	180	0	No	2	NA	3	2021-02-22	-98	84
28	IMPORTA-0778	1	2022-08-30	Jessry Pasquali	Yambio Hospital	2	2020-11-30	19	timbiro	Married Monogamous	2	Business (Man/Women)/trader	2	1	1		28	2	Newly tested at ANC	1	1 visit	1	1	At home	2	Live Birth-LB	1	New on ART -- in pregnancy	2	2020-11-30	1c = TDF/3TC/DTG	3		2020-11-30	Pregnant	2021-05-31	182	6+ months	3	180	180	0	NA	3	NA	3		44347
29	IMPORTA-0779	1	2022-08-30	Jessry Pasquali	Yambio Hospital	2	2021-01-04	39	mukongo	Married Monogamous	2	Housewife	1	3	3	44401			Newly tested at ANC	1				At Health Facility	1	Live Birth-LB	1	New on ART -- in pregnancy	2	2021-01-04	1c = TDF/3TC/DTG	3		2021-01-04	Pregnant	2021-07-05	182	6+ months	3	180	180	0						44382
30	IMPORTA-0780	1	2022-08-30	Jessry Pasquali	Yambio Hospital	2	2021-01-27	23	napere	Married Monogamous	2	Housewife	1	1	2	44351	16	2	Newly tested at ANC	1	1 visit	1	1	At Health Facility	1	Live Birth-LB	1	New on ART -- in pregnancy	2	2021-01-27	1c = TDF/3TC/DTG	3		2021-01-27	Pregnant	2021-07-27	181	6+ months	3	180	180	0	Yes	1	Suppressed	1	2021-07-07	-20	161
31	IMPORTA-0781	1	2022-08-30	Jessry Pasquali	Yambio Hospital	2	2021-02-02	29	akorogbodi	Married Monogamous	2	Farming	2	3	3		20	2	Newly tested at ANC	1	1 visit	1	1	At home	2	Live Birth-LB	1	New on ART -- in pregnancy	2	2021-02-02	1c = TDF/3TC/DTG	3		2021-02-02	Pregnant	2021-08-02	181	6+ months	3	180	180	0	Yes	1	Suppressed	1	2021-07-14	-19	162
32	IMPORTA-0782	1	2022-08-30	Jessry Pasquali	Yambio Hospital	2	2021-02-17	33	naagori	Married Monogamous	2	Housewife	1	2	2	44323	13	1	Newly tested at ANC	1	2 visits	2	2	At home	2	Live Birth-LB	1	New on ART -- in pregnancy	2	2021-02-17	1c = TDF/3TC/DTG	3		2021-02-17	Pregnant	2021-08-17	181	6+ months	3	270	180	90	No	2	NA	3	2021-11-04	79	260
33	IMPORTA-0783	1	2022-08-30	Jessry Pasquali	Yambio Hospital	2	2022-03-03	34	baiparu	Married Monogamous	2	Business (Man/Women)/trader	2	3	4	44412	17	2	Newly tested at ANC	1	1 visit	1	1	At Health Facility	1	Live Birth-LB	1	New on ART -- in pregnancy	2	2021-03-03	1c = TDF/3TC/DTG	3		2021-03-03	Pregnant	2021-09-03	184	6+ months	3	180	180	0	Yes	1	Suppressed	1	2021-09-06	3	187
34	IMPORTA-0784	1	2022-08-30	Jessry Pasquali	Yambio Hospital	2	2021-03-10	20	kuzze	Married Monogamous	2	Housewife	1		3		21	2	Newly tested at ANC	1	1 visit	1	1	At Health Facility	1	Live Birth-LB	1	New on ART -- in pregnancy	2		1c = TDF/3TC/DTG	3		2021-03-10	Pregnant	2021-09-10	184	6+ months	3	190	180	10	No	2	NA	3	2021-10-20	40	224
35	IMPORTA-0785	1	2022-08-31	Jessry Pasquali	Yambio Hospital	2	2020-09-10	30	bureangburu	Married Monogamous	2	Housewife	1	3		44203	24	2	Newly tested at ANC	1				At home	2	Live Birth-LB	1	New on ART -- in pregnancy	2	2020-09-10	1c = TDF/3TC/DTG	3		2020-09-10	Pregnant	2021-03-10	181	6+ months	3	180	180	0	No	2	NA	3	2021-03-05	-5	176
36	IMPORTA-0786	1	2022-08-31	Jessry Pasquali	Yambio Hospital	2	2020-12-10	19	kpirabe	Married Monogamous	2	Student	1				20	2	Newly tested at ANC	1	1 visit	1	1	At Health Facility	1	Live Birth-LB	1	New on ART -- in pregnancy	2	2020-12-10	1c = TDF/3TC/DTG	3		2020-12-10	Pregnant	2022-06-10	547	6+ months	3	180	180	0	Yes	1	Suppressed	1	2021-06-17	-358	189
37	IMPORTA-0787	1	2022-08-31	Jessry Pasquali	Yambio Hospital	2	2021-01-05	23	ikpiru	Married Monogamous	2	Housewife	1	3	3	44310	24	2	Newly tested at ANC	1				At home	2	Live Birth-LB	1	New on ART -- in pregnancy	2	2021-01-05	1c = TDF/3TC/DTG	3		2021-01-05	Pregnant	2021-07-05	181	6+ months	3	180	180	0	Yes	1	Suppressed	1	2021-06-16	-19	162
38	IMPORTA-0788	1	2022-08-31	Jessry Pasquali	Yambio Hospital	2	2021-01-12	22	asanza	Single (never married)	1	Unemployed	1			44293	24	2	Newly tested at ANC	1	1 visit	1	1	At home	2	Live Birth-LB	1	New on ART -- in pregnancy	2	2021-01-12	1c = TDF/3TC/DTG	3		2021-01-12	Pregnant	2021-07-12	181	6+ months	3	180	180	0	No	2	NA	3	2021-07-14	2	183
39	IMPORTA-0789	1	2022-08-31	Jessry Pasquali	Yambio Hospital	2	2022-02-03	30	G/emilia	Married Monogamous	2	Housewife	1	3		44297	28	2	Newly tested at ANC	1	1 visit	1	1	At home	2	Live Birth-LB	1	New on ART -- in pregnancy	2	2021-02-03	1c = TDF/3TC/DTG	3		2022-02-03	Pregnant	2021-08-03				180	180	0	Yes	1	Suppressed	1	2021-07-13	-21
40	IMPORTA-0790	1	2022-08-31	Jessry Pasquali	Yambio Hospital	2	2021-02-09	20	nakpangau	Single (never married)	1	Business (Man/Women)/trader	2	2	3				Newly tested at ANC	1	1 visit	1	1	At Health Facility	1	Live Birth-LB	1	New on ART -- in pregnancy	2	2021-02-09	1c = TDF/3TC/DTG	3		2021-02-09	Pregnant	2021-08-09	181	6+ months	3	180	180	0	No	2	NA	3	2021-08-31	22	203
41	IMPORTA-0791	1	2022-08-31	Jessry Pasquali	Yambio Hospital	2	2021-03-25	16	Hai sujun	Married Monogamous	2	All other professions	2	1	2		32	2	Newly tested at ANC	1	1 visit	1	1	At home	2	Live Birth-LB	1	New on ART -- in pregnancy	2	2021-03-25	1c = TDF/3TC/DTG	3		2021-03-25	Pregnant	2021-09-24	183	6+ months	3	180	180	0	No	2	NA	3	2021-11-02	39	222
42	IMPORTA-0792	1	2022-08-31	Jessry Pasquali	Yambio Hospital	2	2021-04-06	21	baiparu	Married Monogamous	2	Housewife	1	1					Newly tested at ANC	1	1 visit	1	1	At Health Facility	1	Live Birth-LB	1	New on ART -- in pregnancy	2	2021-04-06	1c = TDF/3TC/DTG	3		2021-04-06	Pregnant	2021-10-06	183	6+ months	3	180	180	0	No	2	NA	3	2021-10-06	0	183
43	IMPORTA-0793	1	2022-08-31	Jessry Pasquali	Yambio Hospital	2	2021-04-23	19	kuzee	Married Monogamous	2	Unemployed	1		2	44123	12	1	Newly tested at ANC	1	1 visit	1	1	At home	2	Live Birth-LB	1	New on ART -- in pregnancy	2	2021-04-23	1c = TDF/3TC/DTG	3		2021-04-23	Pregnant	2021-10-22	182	6+ months	3	180	180	0	No	2	NA	3	2021-10-05	-17	165
44	IMPORTA-0794	1	2022-08-31	Jessry Pasquali	Yambio Hospital	2		21	timbiro	Married Monogamous	2	Housewife	1	2					Breastfeeding	1	2 visits	2	2	At home	2	Live Birth-LB	1	New on ART -- postpartum	2	2022-04-26	1c = TDF/3TC/DTG	3		2021-04-26	Breastfeeding	2021-10-26	183	6+ months	3	180	180	0	No	2	NA	3	2021-09-14	-42	141
45	IMPORTA-0795	1	2022-08-31	Jessry Pasquali	Yambio Hospital	2	2021-05-17	36	napere	Married Monogamous	2	Business (Man/Women)/trader	2	3	3	44438	24	2	Newly tested at ANC	1	1 visit	1	1	At Health Facility	1	Live Birth-LB	1	New on ART -- in pregnancy	2	2021-05-17	1c = TDF/3TC/DTG	3		2021-05-17	Pregnant	2021-11-17	184	6+ months	3	180	180	0	NA	3	NA	3	2021-11-04	-13	171
46	IMPORTA-0796	1	2022-08-31	Jessry Pasquali	Yambio Hospital	2	2021-05-26	27	baiparu	Married Polygamous	2	Salaried Employee	2	2	3	44468	24	2	Newly tested at ANC	1	1 visit	1	1	At Health Facility	1	Live Birth-LB	1	New on ART -- in pregnancy	2	2021-05-26	1c = TDF/3TC/DTG	3		2021-05-26	Pregnant	2021-11-26	184	6+ months	3	180	180	0	No	2	NA	3	2021-11-25	-1	183
47	IMPORTA-0797	1	2022-08-31	Jessry Pasquali	Yambio Hospital	2	2021-06-08	25	napere	Married Monogamous	2	Business (Man/Women)/trader	2		3	44478	18	2	Newly tested at ANC	1	1 visit	1	1	At Health Facility	1	Live Birth-LB	1	New on ART -- in pregnancy	2	2021-06-08	1c = TDF/3TC/DTG	3		2022-06-08	Pregnant	2021-12-08				180	180	0	Yes	1	Suppressed	1	2021-12-07	-1
48	IMPORTA-0798	1	2022-08-31	Jessry Pasquali	Yambio Hospital	2	2021-07-06	19	akorogbodi	Married Monogamous	2	Housewife	1	1	2	44437	38	2	Newly tested at ANC	1	4 or more visits	4	3	At Health Facility	1	Live Birth-LB	1	New on ART -- in pregnancy	2	2021-07-06	1c = TDF/3TC/DTG	3		2021-07-06	Pregnant	2022-01-06	184	6+ months	3	180	180	0	Yes	1	Suppressed	1	2022-01-05	-1	183
49	IMPORTA-0799	1	2022-08-31	Jessry Pasquali	Yambio Hospital	2	2021-07-19	25	kada	Married Polygamous	2	Farming	2		3	44481	24	2	Newly tested at ANC	1				At Health Facility	1	Live Birth-LB	1	New on ART -- in pregnancy	2	2021-07-19	1c = TDF/3TC/DTG	3		2021-07-19	Pregnant	2022-01-19	184	6+ months	3	180	180	0	No	2	NA	3	2022-02-23	35	219
50	IMPORTA-0800	1	2022-08-31	Jessry Pasquali	Yambio Hospital	2	2021-07-26	27	baiparu	Divorced/separated	3	Farming	2	3	3		38	2	Newly tested at ANC	1	1 visit	1	1	At home	2	Still Birth-MSB or FSB	2	Already on ART	1	2021-07-26	1c = TDF/3TC/DTG	3		2021-07-26	Pregnant	2022-01-26	184	6+ months	3	180	180	0	No	2	NA	3	2022-01-28	2	186
51	IMPORTA-0801	1	2022-08-31	Jessry Pasquali	Yambio Hospital	2	2021-08-12	23	G/Emilia	Married Monogamous	2	Business (Man/Women)/trader	2	3		44659	4	1	Newly tested at ANC	1	1 visit	1	1	At home	2	Live Birth-LB	1	New on ART -- in pregnancy	2	2021-08-12	1c = TDF/3TC/DTG	3		2021-08-12	Pregnant	2022-02-11	183	6+ months	3	180	180	0	No	2	NA	3	2022-07-29	168	351
52	IMPORTA-0802	1	2022-08-31	Jessry Pasquali	Yambio Hospital	2	2021-08-20	20	G/Emilia	Married Monogamous	2	Housewife	1	2		44620	20	2	Newly tested at ANC	1				At home	2	Live Birth-LB	1	New on ART -- in pregnancy	2	2021-08-20	1c = TDF/3TC/DTG	3		2021-08-20	Pregnant	2022-02-21	185	6+ months	3	180	180	0	Yes	1	Suppressed	1	2022-02-21	0	185
53	IMPORTA-0803	1	2022-08-31	Jessry Pasquali	Yambio Hospital	2	2021-08-23	22	nadaru	Married Monogamous	2	Housewife	1	3	3	44583	16	2	Newly tested at ANC	1	1 visit	1	1	At Health Facility	1	Live Birth-LB	1	New on ART -- in pregnancy	2	2021-08-23	1c = TDF/3TC/DTG	3		2021-08-23	Breastfeeding	2022-02-23	184	6+ months	3	180	180	0	Yes	1	Unsuppressed	2	2022-01-13	-41	143
54	IMPORTA-0804	1	2022-08-04	Jessry Pasquali	Yambio Hospital	2	2021-09-10	19	VTC	Married Monogamous	2	Housewife	1	2	1	44520	28	2	Newly tested at ANC	1	2 visits	2	2	At Health Facility	1	Live Birth-LB	1	New on ART -- in pregnancy	2	2021-09-10	1c = TDF/3TC/DTG	3		2021-09-10	Pregnant	2022-03-10	181	6+ months	3	180	180	0	No	2	NA	3	2022-03-02	-8	173
55	IMPORTA-0805	1	2022-08-31	Jessry Pasquali	Yambio Hospital	2	2021-09-03	24	zambago	Married Monogamous	2	Housewife	1	3	3	44513			Newly tested at ANC	1	1 visit	1	1	At home	2	Live Birth-LB	1	New on ART -- in pregnancy	2	2021-09-03	1c = TDF/3TC/DTG	3		2021-09-13	Pregnant	2022-03-14	182	6+ months	3	180	180	0	Yes	1	Suppressed	1	2022-02-15	-27	155
56	IMPORTA-0806	1	2022-08-31	Jessry Pasquali	Yambio Hospital	2		20	yaborigo	Married Monogamous	2	Business (Man/Women)/trader	2	4	4		14	1	Breastfeeding	1	1 visit	1	1	At Health Facility	1	Live Birth-LB	1	New on ART -- postpartum	2	2021-10-15	1c = TDF/3TC/DTG	3		2021-10-15	Breastfeeding	2022-04-15	182	6+ months	3	180	180	0	Yes	1	Suppressed	1	2022-03-28	-18	164
59	IMPORTA-0809	1	2022-08-31	Jessry Pasquali	Yambio Hospital	2	2020-05-21	25	naduru	Married Monogamous	2	Farming	2	3	4	44000	11	1	Newly tested at ANC	1	1 visit	1	1	At Health Facility	1	Live Birth-LB	1	New on ART -- in pregnancy	2	2020-05-21	1c = TDF/3TC/DTG	3		2020-05-21	Pregnant	2020-11-20	183	6+ months	3	180	180	0	No	2	NA	3	2020-12-09	19	202
60	IMPORTA-0810	1	2022-08-04	Jessry Pasquali	Yambio Hospital	2	2021-06-07	23	mameze	Married Polygamous	2	Unemployed	1		3	44525	16	2	Newly tested at ANC	1	1 visit	1	1	At home	2	Live Birth-LB	1	New on ART -- in pregnancy	2	2021-06-07	1c = TDF/3TC/DTG	3		2021-06-07	Pregnant	2021-12-07	183	6+ months	3	180	180	0	Yes	1	Suppressed	1	2021-11-23	-14	169
1	IMPORTA-0811	1	2022-09-07	Maleth Maker Manyiel	Mary Immaculate Mapourdit Hospital	3	2019-10-29	26	magaya	Married Monogamous	2	Housewife	1	2	3		24	2	Newly tested at ANC	1	3 visits	3	3	At home	2	Live Birth-LB	1	New on ART -- in pregnancy	2	2019-10-29	1c = TDF/3TC/DTG	3		2019-10-29	Pregnant	2020-01-27	90	3-5 months	2	90	90	0	NA	3	NA	3	2019-11-28	-60	30
2	IMPORTA-0812	1	2022-09-07	Maleth Maker Manyiel	Mary Immaculate Mapourdit Hospital	3	2020-11-03	20	mapuordit	Married Polygamous	2	Housewife	1	1	2		20	2	Known Pos on ART	2	2 visits	2	2	At Health Facility	1	Live Birth-LB	1	Already on ART	1	2020-01-17	1c = TDF/3TC/DTG	3		2020-11-03	Pregnant	2021-02-03	92	3-5 months	2	90	270	-180	NA	3	NA	3	2021-08-31	209	301
3	IMPORTA-0813	1	2022-09-07	Maleth Maker Manyiel	Mary Immaculate Mapourdit Hospital	3	2020-11-19	28	mangeng	Married Monogamous	2	Housewife	1	3	3				Newly tested at ANC	1	2 visits	2	2	At home	2	Live Birth-LB	1	New on ART -- in pregnancy	2	2020-11-19	1c = TDF/3TC/DTG	3		2021-11-19	Pregnant	2021-05-21				180	365	-185	NA	3	NA	3	2022-05-21	365	183
4	IMPORTA-0814	1	2022-09-07	Maleth Maker Manyiel	Mary Immaculate Mapourdit Hospital	3		28	wouwou	Married Monogamous	2	Housewife	1		3				Known Pos on ART	2	1 visit	1	1	At home	2	Live Birth-LB	1	Already on ART	1	2015-06-29	1f = TDF/3TC/EFV	6		2020-11-11	Pregnant	2022-02-24	470	6+ months	3	90	276	-186	NA	3	NA	3	2021-11-01	-115	355
5	IMPORTA-0815	1	2022-09-07	Maleth Maker Manyiel	Mary Immaculate Mapourdit Hospital	3		23	imok	Married Polygamous	2	Housewife	1	1	2				Known Pos on ART	2	2 visits	2	2					Already on ART	1	2020-07-06	1c = TDF/3TC/DTG	3			Pregnant	2021-04-19	44305	6+ months	3	180	180	0	No	2	NA	3	2021-04-19	0	44305
6	IMPORTA-0816	1	2022-09-07	Maleth Maker Manyiel	Mary Immaculate Mapourdit Hospital	3	2020-12-17	28	pulameth	Married Monogamous	2	Housewife	1		3				Newly tested at ANC	1	1 visit	1	1			Live Birth-LB	1	New on ART -- in pregnancy	2		1c = TDF/3TC/DTG	3		2020-12-17	Pregnant	2021-03-16	89	<3 months	1	90	90	0	NA	3	NA	3	2020-02-28	-382
7	IMPORTA-0817	1	2022-09-07	Maleth Maker Manyiel	Mary Immaculate Mapourdit Hospital	3		28	kouic	Married Polygamous	2	Housewife	1		3		16	2	Known Pos on ART	2	2 visits	2	2	At home	2	Live Birth-LB	1	Already on ART	1	2015-11-10	1f = TDF/3TC/EFV	6			Pregnant	2021-03-18	44273	6+ months	3	90	98	-8	No	2	NA	3	2021-03-18	0	44273
8	IMPORTA-0818	1	2022-09-07	Maleth Maker Manyiel	Mary Immaculate Mapourdit Hospital	3	2020-12-01	23	muorlueth	Married Monogamous	2	Housewife	1	1	2		20	2	Known Pos on ART	2	2 visits	2	2	At Health Facility	1			Already on ART	1	2014-12-16	1f = TDF/3TC/EFV	6		2020-12-01	Pregnant	2021-04-23	143	3-5 months	2	90	90	0	No	2	NA	3	2021-04-23	0	143
9	IMPORTA-0819	1	2022-08-07	Maleth Maker Manyiel	Mary Immaculate Mapourdit Hospital	3	2021-01-04	24	ilai	Married Polygamous	2	Housewife	1		2		24	2	Known Pos on ART	2	1 visit	1	1	At Health Facility	1	Live Birth-LB	1	Already on ART	1	2017-07-28	1f = TDF/3TC/EFV	6		2021-01-04	Pregnant	2021-07-06	183	6+ months	3	180	180	0	No	2	NA	3	2021-07-06	0	183
10	IMPORTA-0820	1	2022-09-07	Maleth Maker Manyiel	Mary Immaculate Mapourdit Hospital	3		33	luengjier	Married Polygamous	2	Housewife	1	3	3		8	1	Known Pos on ART	2	1 visit	1	1	At home	2	Live Birth-LB	1	Already on ART	1	2018-04-17	1f = TDF/3TC/EFV	6			Pregnant	2021-05-01	44317	6+ months	3	90	90	0					2021-05-01	0	44317
11	IMPORTA-0821	1	2022-08-07	Maleth Maker Manyiel	Mary Immaculate Mapourdit Hospital	3		30	pulameth	Married Monogamous	2	Housewife	1	3	3		12	1	Known Pos on ART	2	2 visits	2	2					Already on ART	1	2015-06-30	1f = TDF/3TC/EFV	6			Pregnant	2021-07-26	44403	6+ months	3	180	180	0	No	2	NA	3	2021-07-26	0	44403
12	IMPORTA-0822	1	2022-09-07	Maleth Maker Manyiel	Mary Immaculate Mapourdit Hospital	3		38	mapuordit	Married Polygamous	2	Housewife	1	3	3		6	1	Known Pos on ART	2	2 visits	2	2	At Health Facility	1	Live Birth-LB	1	Already on ART	1	2015-07-07	1f = TDF/3TC/EFV	6			Pregnant	2021-06-05	44352	6+ months	3	180	180	0					2021-06-05	0	44352
13	IMPORTA-0823	1	2022-09-07	Maleth Maker Manyiel	Mary Immaculate Mapourdit Hospital	3	2021-02-05	34	kouic	Married Polygamous	2	Housewife	1	3	3		24	2	Newly tested at ANC	1	1 visit	1	1	At Health Facility	1	Live Birth-LB	1	New on ART -- in pregnancy	2	2021-02-05	1c = TDF/3TC/DTG	3		2021-02-05	Pregnant	2021-08-06	182	6+ months	3	180	180	0	NA	3	NA	3	2021-08-06	0	182
14	IMPORTA-0824	1	2022-09-07	Maleth Maker Manyiel	Mary Immaculate Mapourdit Hospital	3	2021-01-04	18	atemwei	Married Monogamous	2	Housewife	1	3	1		24	2	Known Pos on ART	2	1 visit	1	1	At home	2	Live Birth-LB	1	Already on ART	1		1c = TDF/3TC/DTG	3		2021-01-04	Pregnant	2021-07-26	203	6+ months	3	180	200	-20	No	2	NA	3	2021-09-03	39	242
15	IMPORTA-0825	1	2022-09-07	Maleth Maker Manyiel	Mary Immaculate Mapourdit Hospital	3	2021-01-12	20	panamat	Married Monogamous	2	Housewife	1	3	3		18	2	Known Pos on ART	2	1 visit	1	1	At home	2	Live Birth-LB	1	Already on ART	1	2020-06-01	1c = TDF/3TC/DTG	3		2021-01-12	Pregnant	2021-07-13	182	6+ months	3	180	180	0	No	2	NA	3	2022-02-20	222	404
16	IMPORTA-0826	1	2022-09-09	Maleth Maker Manyiel	Mary Immaculate Mapourdit Hospital	3	2021-02-05	17	majok	Married Monogamous	2	Housewife	1	1	1		32	2	Newly tested at ANC	1	1 visit	1	1			Live Birth-LB	1	New on ART -- in pregnancy	2	2021-02-02	1c = TDF/3TC/DTG	3		2021-02-02	Pregnant	2021-07-30	178	3-5 months	2	180	183	-3	NA	3	NA	3	2021-08-02	3	181
17	IMPORTA-0827	1	2022-09-09	Maleth Maker Manyiel	Mary Immaculate Mapourdit Hospital	3	2021-02-09	21	nyaliel	Married Polygamous	2	Housewife	1	2	3		20	2	Known Pos on ART	2	2 visits	2	2	At home	2	Live Birth-LB	1	Already on ART	1	2019-03-20	1c = TDF/3TC/DTG	3		2021-02-09	Pregnant	2021-07-12	153	3-5 months	2	180	180	0	Yes	1	Suppressed	1	2021-05-26	-47	106
18	IMPORTA-0828	1	2022-09-09	Maleth Maker Manyiel	Mary Immaculate Mapourdit Hospital	3	2020-09-29	25	mapuordit	Married Polygamous	2	Housewife	1	2	3		28	2	Known Pos on ART	2	1 visit	1	1	At Health Facility	1	Live Birth-LB	1	Already on ART	1	2020-01-29	1c = TDF/3TC/DTG	3		2020-09-29	Pregnant	2021-03-23	175	3-5 months	2	180	180	0					2021-08-22	152	327
19	IMPORTA-0829	1	2022-09-09	Maleth Maker Manyiel	Mary Immaculate Mapourdit Hospital	3	2020-08-20	30	Dhiailguek	Married Monogamous	2	Housewife	1	3	3		8	1	Newly tested at ANC	1	3 visits	3	3	At Health Facility	1	Live Birth-LB	1	Already on ART	1	2020-08-20	1c = TDF/3TC/DTG	3		2020-08-20	Pregnant	2020-11-18	90	3-5 months	2	90	114	-24					2020-12-01	13	103
20	IMPORTA-0830	1	2022-09-09	Maleth Maker Manyiel	Mary Immaculate Mapourdit Hospital	3	2021-02-18	27	Alee	Married Polygamous	2	Housewife	1	3	3		12	1	Known Pos on ART	2	1 visit	1	1					Already on ART	1	2018-12-18	1c = TDF/3TC/DTG	3		2021-02-18	Pregnant	2021-07-22	154	3-5 months	2	180	210	-30	Yes	1	Suppressed	1	2021-08-23	32	186
21	IMPORTA-0831	1	2022-09-09	Maleth Maker Manyiel	Mary Immaculate Mapourdit Hospital	3	2020-08-18	25	majok	Married Monogamous	2	Housewife	1		3		36	2	Known Pos on ART	2	1 visit	1	1	At Health Facility	1			Already on ART	1	2018-07-18	1f = TDF/3TC/EFV	6		2020-08-18	Pregnant	2020-11-18	92	3-5 months	2	90	270	-180					2021-03-23	125	217
22	IMPORTA-0832	1	2022-09-09	Maleth Maker Manyiel	Mary Immaculate Mapourdit Hospital	3	2021-02-18	20	Alee	Married Monogamous	2	Housewife	1	3	3				Known Pos on ART	2	2 visits	2	2	At home	2	Live Birth-LB	1	Already on ART	1	2015-06-04	1c = TDF/3TC/DTG	3		2021-02-18	Pregnant	2021-06-08	110	3-5 months	2	180	150	30	Yes	1	Suppressed	1	2021-06-08	0	110
23	IMPORTA-0833	1	2022-09-09	Maleth Maker Manyiel	Mary Immaculate Mapourdit Hospital	3	2018-03-16	30	mapuordit	Married Polygamous	2	Housewife	1		3		32	2	Known Pos on ART	2	2 visits	2	2	At Health Facility	1	Live Birth-LB	1	Already on ART	1	2014-11-15	1f = TDF/3TC/EFV	6		2020-03-16	Pregnant	2020-09-16	184	6+ months	3	180	330	-150					2021-02-28	165	349
24	IMPORTA-0834	1	2022-09-09	Maleth Maker Manyiel	Mary Immaculate Mapourdit Hospital	3	2021-02-22	19	Alee	Married Monogamous	2	Housewife	1	1	2				Known Pos on ART	2	2 visits	2	2	At Health Facility	1	Live Birth-LB	1	Already on ART	1	2016-01-21	1c = TDF/3TC/DTG	3		2021-02-22	Pregnant	2021-06-22	120	3-5 months	2	150	150	0	Yes	1	Unsuppressed	2	2021-06-22	0	120
25	IMPORTA-0835	1	2022-09-09	Maleth Maker Manyiel	Mary Immaculate Mapourdit Hospital	3	2020-07-14	22	mapuordit	Married Monogamous	2	Housewife	1		2		14	1	Known Pos on ART	2	3 visits	3	3	At home	2	Live Birth-LB	1	Already on ART	1	2018-02-18	1f = TDF/3TC/EFV	6		2020-07-14	Pregnant	2020-12-29	168	3-5 months	2	180	180	0					2020-12-29	0	168
26	IMPORTA-0836	1	2022-09-09	Maleth Maker Manyiel	Mary Immaculate Mapourdit Hospital	3	2021-03-21	20	wouwou	Married Polygamous	2	Housewife	1	2	3		32	2	Newly tested at ANC	1				At Health Facility	1	Live Birth-LB	1	New on ART -- in pregnancy	2		1c = TDF/3TC/DTG	3		2021-03-21	Pregnant	2021-08-26	158	3-5 months	2	150	150	0	NA	3	NA	3	2021-08-26	0	158
27	IMPORTA-0837	1	2022-09-09	Maleth Maker Manyiel	Mary Immaculate Mapourdit Hospital	3	2021-04-19	20	palingjir	Married Polygamous	2	Housewife	1	3	3		16	2	Newly tested at ANC	1	2 visits	2	2	At home	2	Live Birth-LB	1	New on ART -- in pregnancy	2		1c = TDF/3TC/DTG	3		2021-04-19	Pregnant	2021-07-19	91	3-5 months	2	90	90	0	No	2	NA	3	2021-06-18	-31	60
28	IMPORTA-0838	1	2022-09-09	Maleth Maker Manyiel	Mary Immaculate Mapourdit Hospital	3	2020-06-25	22	pokich	Married Polygamous	2	Housewife	1	1	2		16	2	Known Pos on ART	2	2 visits	2	2	At Health Facility	1	Live Birth-LB	1	Already on ART	1		1c = TDF/3TC/DTG	3		2020-06-25	Pregnant	2020-12-21	179	3-5 months	2	180	227	-47					2021-02-08	49	228
29	IMPORTA-0839	1	2022-09-09	Maleth Maker Manyiel	Mary Immaculate Mapourdit Hospital	3	2021-04-19	19	majok	Married Polygamous	2	Housewife	1	2	3				Known Pos on ART	2	1 visit	1	1	At home	2	Live Birth-LB	1	Already on ART	1	2018-11-02	1c = TDF/3TC/DTG	3		2021-04-19	Pregnant	2021-07-19	91	3-5 months	2	90	180	-90					2021-11-19	123	214
30	IMPORTA-0840	1	2022-09-09	Maleth Maker Manyiel	Mary Immaculate Mapourdit Hospital	3	2020-06-22	19	Aluakluak	Married Monogamous	2	Housewife	1		1		14	1	Newly tested at ANC	1	1 visit	1	1	At home	2	Live Birth-LB	1	New on ART -- in pregnancy	2	2020-06-22	1c = TDF/3TC/DTG	3		2020-06-22	Pregnant	2020-09-22	92	3-5 months	2	90	240	-150					2022-05-19	604	696
31	IMPORTA-0841	1	2022-09-09	Maleth Maker Manyiel	Mary Immaculate Mapourdit Hospital	3	2021-05-05	37	poric	Married Polygamous	2	Housewife	1	3	3				Known Pos on ART	2	2 visits	2	2	At home	2	Live Birth-LB	1	Already on ART	1		1c = TDF/3TC/DTG	3		2021-05-05	Pregnant	2021-10-04	152	3-5 months	2	180	210	-30	No	2	NA	3		44473
32	IMPORTA-0842	1	2022-09-09	Maleth Maker Manyiel	Mary Immaculate Mapourdit Hospital	3	2020-04-08	23	Aluakluak	Married Polygamous	2	Housewife	1	1	2		22	2	Known Pos on ART	2	1 visit	1	1	At home	2			Already on ART	1	2017-10-26	1f = TDF/3TC/EFV	6		2020-04-08	Pregnant	2020-11-25	231	6+ months	3	180	175	5					2020-10-15	-41	190
33	IMPORTA-0843	1	2022-09-09	Maleth Maker Manyiel	Mary Immaculate Mapourdit Hospital	3	2020-04-02	19	Lungjier	Married Monogamous	2	Housewife	1		1		20	2	Newly tested at ANC	1	1 visit	1	1	At home	2	Live Birth-LB	1	New on ART -- in pregnancy	2	2020-04-02	1c = TDF/3TC/DTG	3		2020-04-02	Pregnant	2020-09-28	179	3-5 months	2	180	257	-77					2021-04-15	199	378
34	IMPORTA-0844	1	2022-09-09	Maleth Maker Manyiel	Mary Immaculate Mapourdit Hospital	3	2021-05-24	20	mapuordit	Married Polygamous	2	Housewife	1	1	2				Newly tested at ANC	1				At home	2	Live Birth-LB	1	New on ART -- in pregnancy	2		1c = TDF/3TC/DTG	3		2021-05-24	Pregnant	2021-11-24	184	6+ months	3	180	180	0	NA	3	NA	3	2021-11-24	0	184
35	IMPORTA-0845	1	2022-09-09	Maleth Maker Manyiel	Mary Immaculate Mapourdit Hospital	3	2020-03-10	22	majok	Married Monogamous	2	Housewife	1		2		20	2	Known Pos on ART	2	2 visits	2	2	At home	2	Live Birth-LB	1	Already on ART	1	2018-07-05	1f = TDF/3TC/EFV	6		2020-03-10	Pregnant	2020-06-19	101	3-5 months	2	90	120	-30					2020-07-23	34	135
36	IMPORTA-0846	1	2022-09-09	Maleth Maker Manyiel	Mary Immaculate Mapourdit Hospital	3	2022-05-06	37	mapuordit	Married Polygamous	2	Housewife	1	3	3				Known Pos on ART	2	2 visits	2	2	At Health Facility	1	Live Birth-LB	1	Already on ART	1	2014-12-19	1c = TDF/3TC/DTG	3		2021-05-06	Pregnant	2021-11-05	183	6+ months	3	180	180	0	Yes	1	Suppressed	1	2021-10-01	-35	148
37	IMPORTA-0847	1	2022-09-09	Maleth Maker Manyiel	Mary Immaculate Mapourdit Hospital	3	2020-03-12	35	Iiyou	Married Polygamous	2	Housewife	1	3	3		18	2	Known Pos on ART	2	1 visit	1	1	At home	2	Live Birth-LB	1	Already on ART	1	2015-10-21	1f = TDF/3TC/EFV	6		2020-08-10	Pregnant	2020-11-09	91	3-5 months	2	90	390	-300					2021-10-08	333	424
38	IMPORTA-0848	1	2022-09-09	Maleth Maker Manyiel	Mary Immaculate Mapourdit Hospital	3	2020-03-06	29	mapuordit	Married Polygamous	2	Housewife	1	3	3		20	2	Known Pos on ART	2	1 visit	1	1			Live Birth-LB	1	Already on ART	1	2019-07-02	1c = TDF/3TC/DTG	3		2020-03-06	Pregnant	2020-09-06	184	6+ months	3	180	180	0					2020-09-06	0	184
39	IMPORTA-0849	1	2022-09-09	Maleth Maker Manyiel	Mary Immaculate Mapourdit Hospital	3	2020-03-05	21	mapuordit	Married Monogamous	2	Housewife	1	1	2		32	2	Newly tested at ANC	1	1 visit	1	1	At home	2	Live Birth-LB	1	New on ART -- in pregnancy	2	2020-03-05	1c = TDF/3TC/DTG	3		2020-03-05	Pregnant	2020-06-05	92	3-5 months	2	90	90	0					2020-06-05	0	92
40	IMPORTA-0850	1	2022-09-09	Maleth Maker Manyiel	Mary Immaculate Mapourdit Hospital	3	2020-10-24	31	mabui	Married Polygamous	2	Housewife	1	3	3				Known Pos on ART	2	3 visits	3	3	At home	2	Live Birth-LB	1	Already on ART	1	2014-10-31	1f = TDF/3TC/EFV	6		2019-10-24	Pregnant	2020-01-21	89	<3 months	1	90	90	0					2019-11-21	-61	28
41	IMPORTA-0851	1	2022-09-09	Maleth Maker Manyiel	Mary Immaculate Mapourdit Hospital	3	2021-05-20	31	pingyic	Married Polygamous	2	Housewife	1	3	3		25	2	Newly tested at ANC	1	1 visit	1	1			Live Birth-LB	1	New on ART -- in pregnancy	2		1c = TDF/3TC/DTG	3		2021-05-20	Pregnant	2021-11-18	182	6+ months	3	180	142	38	NA	3	NA	3	2022-01-20	63	245
42	IMPORTA-0852	1	2022-09-09	Maleth Maker Manyiel	Mary Immaculate Mapourdit Hospital	3	2019-10-24	26	pulameth	Married Polygamous	2	Housewife	1	2	3		33	2	Known Pos on ART	2	3 visits	3	3	At Health Facility	1	Live Birth-LB	1	Already on ART	1	2014-10-31	1f = TDF/3TC/EFV	6		2019-10-24	Pregnant	2020-01-21	89	<3 months	1	90	79	11					2019-12-19	-33	56
43	IMPORTA-0853	1	2022-09-09	Maleth Maker Manyiel	Mary Immaculate Mapourdit Hospital	3	2019-06-07	20	majok	Married Monogamous	2	Housewife	1	5	1				Known Pos on ART	2	2 visits	2	2	At home	2	Live Birth-LB	1	Already on ART	1	2017-08-10	1f = TDF/3TC/EFV	6		2019-06-07	Pregnant	2019-12-02	178	3-5 months	2	180	177	3					2019-10-27	-36	142
44	IMPORTA-0854	1	2022-09-09	Maleth Maker Manyiel	Mary Immaculate Mapourdit Hospital	3	2021-05-26	23	mapuordit	Married Monogamous	2	Housewife	1	2	3				Newly tested at ANC	1				At home	2	Live Birth-LB	1	New on ART -- in pregnancy	2		1c = TDF/3TC/DTG	3		2021-05-26	Pregnant	2021-11-24	182	6+ months	3	180	180	0	NA	3	NA	3	2021-11-24	0	182
45	IMPORTA-0855	1	2022-09-09	Maleth Maker Manyiel	Mary Immaculate Mapourdit Hospital	3	2019-10-11	34	Aluakluak	Married Monogamous	2	Housewife	1	3	3		8	1	Known Pos on ART	2	2 visits	2	2	At Health Facility	1	Live Birth-LB	1	Already on ART	1	2017-05-08	1f = TDF/3TC/EFV	6		2019-10-11	Pregnant	2020-05-11	213	6+ months	3	180	180	0					2020-05-11	0	213
46	IMPORTA-0856	1	2022-09-09	Maleth Maker Manyiel	Mary Immaculate Mapourdit Hospital	3	2021-07-30	26	Ilai	Married Monogamous	2	Housewife	1	3	3		12	1	Newly tested at ANC	1	1 visit	1	1			Live Birth-LB	1	New on ART -- in pregnancy	2		1c = TDF/3TC/DTG	3		2021-07-30	Pregnant	2022-02-01	186	6+ months	3	180	180	0	NA	3	NA	3	2021-12-06	-57	129
47	IMPORTA-0857	1	2022-09-09	Maleth Maker Manyiel	Mary Immaculate Mapourdit Hospital	3	2019-10-08	26	mapuordit	Married Polygamous	2	Housewife	1		3				Newly tested at ANC	1				At home	2	Live Birth-LB	1	New on ART -- in pregnancy	2		1c = TDF/3TC/DTG	3		2021-10-08	Pregnant	2020-01-07				90	90	0					2020-01-28	21
48	IMPORTA-0858	1	2022-09-09	Maleth Maker Manyiel	Mary Immaculate Mapourdit Hospital	3	2021-09-18	36	mapuordit	Married Polygamous	2	Housewife	1	3	3		13	1	Known Pos on ART	2	2 visits	2	2	At home	2	Live Birth-LB	1	Already on ART	1	2015-08-20	1c = TDF/3TC/DTG	3		2021-05-26	Pregnant	2021-11-25	183	6+ months	3	180	190	-10	No	2	NA	3	2021-12-06	11	194
49	IMPORTA-0859	1	2022-09-09	Maleth Maker Manyiel	Mary Immaculate Mapourdit Hospital	3	2019-10-10	23	aluakluak	Married Monogamous	2	Housewife	1	1	2		20	2	Newly tested at ANC	1	2 visits	2	2	At home	2	Live Birth-LB	1	New on ART -- in pregnancy	2	2019-10-10	1c = TDF/3TC/DTG	3		2019-10-10	Pregnant	2020-01-16	98	3-5 months	2	90	101	-11					2020-01-30	14	112
50	IMPORTA-0860	1	2022-09-09	Maleth Maker Manyiel	Mary Immaculate Mapourdit Hospital	3	2021-06-26	20	mapuordit	Married Monogamous	2	Housewife	1	2	3		20	2	Known Pos on ART	2	2 visits	2	2	At Health Facility	1			Already on ART	1	2018-11-02	1c = TDF/3TC/DTG	3		2021-01-24	Pregnant	2021-08-24	212	6+ months	3	60	90	-30	No	2	NA	3	2021-08-24	0	212
51	IMPORTA-0861	1	2022-09-10	Maleth Maker Manyiel	Mary Immaculate Mapourdit Hospital	3	2021-06-18	19	mapuordit	Married Monogamous	2	Housewife	1	1	2		20	2	Known Pos on ART	2	1 visit	1	1	At home	2	Live Birth-LB	1	Already on ART	1	2020-09-30	1c = TDF/3TC/DTG	3		2021-06-15	Pregnant	2021-12-14	182	6+ months	3	180	231	-51	Yes	1	Unsuppressed	2	2022-02-04	52	234
52	IMPORTA-0862	1	2022-09-10	Maleth Maker Manyiel	Mary Immaculate Mapourdit Hospital	3	2021-06-15	21	mapuordit	Married Monogamous	2	Housewife	1		3		8	1	Known Pos on ART	2	2 visits	2	2	At Health Facility	1	Live Birth-LB	1	Already on ART	1	2018-06-01	1c = TDF/3TC/DTG	3		2021-12-06	Pregnant	2021-12-14	8	<3 months	1	180	190	-10	Yes	1	Suppressed	1	2022-02-10	58	66
53	IMPORTA-0863	1	2022-09-10	Maleth Maker Manyiel	Mary Immaculate Mapourdit Hospital	3	2021-06-18	23	rokbet	Widowed	3	Housewife	1	3	3		24	2	Known Pos not on ART	2	1 visit	1	1	At home	2	Live Birth-LB	1	New on ART -- in pregnancy	2	2021-06-18	1c = TDF/3TC/DTG	3		2021-06-18	Pregnant	2021-12-17	182	6+ months	3	180	180	0	No	2	NA	3	2021-12-14	-3	179
54	IMPORTA-0864	1	2022-09-10	Maleth Maker Manyiel	Mary Immaculate Mapourdit Hospital	3	2022-06-18	21	Anuol	Married Monogamous	2	Housewife	1	2	3		11	1	Newly tested at ANC	1	2 visits	2	2	At home	2	Live Birth-LB	1	New on ART -- in pregnancy	2	2021-06-03	1c = TDF/3TC/DTG	3		2021-06-18	Pregnant	2021-12-17	182	6+ months	3	180	210	-30	No	2	NA	3	2022-01-21	35	217
55	IMPORTA-0865	1	2022-09-10	Maleth Maker Manyiel	Mary Immaculate Mapourdit Hospital	3	2021-07-16	25	mapuordit	Married Monogamous	2	Housewife	1	3	3		12	1	Newly tested at ANC	1	1 visit	1	1	At Health Facility	1	Live Birth-LB	1	New on ART -- in pregnancy	2	2021-07-16	1c = TDF/3TC/DTG	3		2021-07-16	Pregnant	2022-01-14	182	6+ months	3	180	191	-11	No	2	NA	3	2022-01-25	11	193
56	IMPORTA-0866	1	2022-09-10	Maleth Maker Manyiel	Mary Immaculate Mapourdit Hospital	3	2021-07-01	31	mapuordit	Married Polygamous	2	Housewife	1	3	3		32	2	Known Pos on ART	2	2 visits	2	2			Live Birth-LB	1	Already on ART	1	2014-10-31	1c = TDF/3TC/DTG	3		2021-07-01	Pregnant	2021-12-30	182	6+ months	3	180	180	0	Yes	1	Suppressed	1	2021-12-30	0	182
57	IMPORTA-0867	1	2022-09-10	Maleth Maker Manyiel	Mary Immaculate Mapourdit Hospital	3	2021-07-12	30	mapuordit	Married Polygamous	2	Housewife	1	3	3		8	1	Newly tested at ANC	1	1 visit	1	1	At home	2	Live Birth-LB	1	New on ART -- in pregnancy	2	2021-07-12	1c = TDF/3TC/DTG	3		2021-07-12	Pregnant	2022-01-10	182	6+ months	3	180	255	-75	No	2	NA	3	2022-04-04	84	266
58	IMPORTA-0868	1	2022-09-10	Maleth Maker Manyiel	Mary Immaculate Mapourdit Hospital	3	2021-07-16	30	mapuordit	Married Polygamous	2	Housewife	1	3	3				Newly tested at ANC	1	1 visit	1	1	At home	2			New on ART -- in pregnancy	2	2021-07-16	1c = TDF/3TC/DTG	3		2021-07-16	Pregnant	2022-01-14	182	6+ months	3	180	180	0	No	2	NA	3	2022-01-14	0	182
59	IMPORTA-0869	1	2022-09-10	Maleth Maker Manyiel	Mary Immaculate Mapourdit Hospital	3	2021-06-14	28	pokic	Married Monogamous	2	Housewife	1	2	3		12	1	Newly tested at ANC	1	1 visit	1	1	At home	2	Live Birth-LB	1	New on ART -- in pregnancy	2	2021-06-14	1c = TDF/3TC/DTG	3		2021-06-14	Pregnant	2021-12-13	182	6+ months	3	180	180	0	No	2	NA	3	2021-12-13	0	182
60	IMPORTA-0870	1	2022-09-10	Maleth Maker Manyiel	Mary Immaculate Mapourdit Hospital	3	2021-08-10	34	ngop	Married Polygamous	2	Housewife	1	3	3				Known Pos not on ART	2	1 visit	1	1					New on ART -- in pregnancy	2		1c = TDF/3TC/DTG	3		2021-08-10	Pregnant	2022-02-10	184	6+ months	3	180	180	0	No	2	NA	3	2022-02-10	0	184
61	IMPORTA-0871	1	2022-09-10	Maleth Maker Manyiel	Mary Immaculate Mapourdit Hospital	3	2021-08-10	30	majok	Married Polygamous	2	Housewife	1	3	3		23	2	Newly tested at ANC	1	1 visit	1	1	At Health Facility	1	Live Birth-LB	1	New on ART -- in pregnancy	2	2021-08-10	1c = TDF/3TC/DTG	3		2021-08-10	Pregnant	2022-02-10	184	6+ months	3	180	228	-48	No	2	NA	3	2022-03-30	48	232
62	IMPORTA-0872	1	2022-09-10	Maleth Maker Manyiel	Mary Immaculate Mapourdit Hospital	3	2021-08-10	20	wouwou	Married Monogamous	2	Housewife	1	3	3				Known Pos on ART	2	1 visit	1	1	At home	2			Already on ART	1	2019-02-08	1c = TDF/3TC/DTG	3		2021-08-10	Pregnant	2022-02-11	185	6+ months	3	180	180	0	No	2	NA	3	2022-02-11	0	185
63	IMPORTA-0873	1	2022-09-10	Maleth Maker Manyiel	Mary Immaculate Mapourdit Hospital	3	2021-08-12	22	aluakluak	Married Monogamous	2	Housewife	1	1	2		22	2	Newly tested at ANC	1	1 visit	1	1	At Health Facility	1	Live Birth-LB	1	New on ART -- in pregnancy	2	2022-08-12	1c = TDF/3TC/DTG	3		2021-08-12	Pregnant	2022-02-11	183	6+ months	3	180	180	0	No	2	NA	3	2022-01-05	-37	146
64	IMPORTA-0874	1	2022-09-10	Maleth Maker Manyiel	Mary Immaculate Mapourdit Hospital	3	2021-08-17	24	mapuordit	Married Monogamous	2	Housewife	1	3	3				Newly tested at ANC	1	1 visit	1	1	At home	2	Live Birth-LB	1	New on ART -- in pregnancy	2	2021-08-17	1c = TDF/3TC/DTG	3		2021-08-17	Pregnant	2022-02-15	182	6+ months	3	180	284	-104	No	2	NA	3	2022-05-30	104	286
65	IMPORTA-0875	1	2022-09-10	Maleth Maker Manyiel	Mary Immaculate Mapourdit Hospital	3	2021-08-16	38	ngop	Widowed	3	Housewife	1	3	3		25	2	Known Pos on ART	2	2 visits	2	2	At home	2	Live Birth-LB	1	Already on ART	1	2015-12-12	1c = TDF/3TC/DTG	3		2021-08-16	Pregnant	2022-02-14	182	6+ months	3	180	225	-45	NA	3	NA	3	2022-03-31	45	227
66	IMPORTA-0876	1	2022-09-10	Maleth Maker Manyiel	Mary Immaculate Mapourdit Hospital	3	2021-08-19	21	ngop	Married Monogamous	2	Housewife	1	2	3		12	1	Known Pos on ART	2	1 visit	1	1	At home	2	Live Birth-LB	1	Already on ART	1	2020-04-30	1c = TDF/3TC/DTG	3		2021-08-19	Pregnant	2021-02-18				180	220	-40	Yes	1	Suppressed	1	2022-04-01	407	225
67	IMPORTA-0877	1	2022-09-10	Maleth Maker Manyiel	Mary Immaculate Mapourdit Hospital	3	2021-08-13	29	ngop	Married Monogamous	2	Housewife	1	3	3				Known Pos not on ART	2	1 visit	1	1			Live Birth-LB	1	New on ART -- in pregnancy	2	2018-08-09	1c = TDF/3TC/DTG	3		2021-08-13	Pregnant	2022-02-10	181	6+ months	3	180	195	-15	NA	3	NA	3	2022-02-25	15	196
68	IMPORTA-0878	1	2022-09-10	Maleth Maker Manyiel	Mary Immaculate Mapourdit Hospital	3	2021-08-13	37	aluakluak	Married Polygamous	2	Housewife	1	3	3		14	1	Known Pos not on ART	2	2 visits	2	2	At Health Facility	1	Live Birth-LB	1	New on ART -- in pregnancy	2	2019-08-26	1c = TDF/3TC/DTG	3		2021-08-13	Pregnant	2022-02-10	181	6+ months	3	180	195	-15	No	2	NA	3	2022-02-25	15	196
69	IMPORTA-0879	1	2022-09-10	Maleth Maker Manyiel	Mary Immaculate Mapourdit Hospital	3	2021-08-13	21	pokic	Married Monogamous	2	Housewife	1	2	3		14	1	Known Pos on ART	2	1 visit	1	1	At home	2	Live Birth-LB	1	Already on ART	1		1c = TDF/3TC/DTG	3		2021-08-13	Pregnant	2022-02-10	181	6+ months	3	180	310	-130	No	2	NA	3	2022-06-22	132	313
70	IMPORTA-0880	1	2022-09-10	Maleth Maker Manyiel	Mary Immaculate Mapourdit Hospital	3	2022-08-02	22	maboradhiak	Married Monogamous	2	Housewife	1	3	3		13	1	Known Pos on ART	2	2 visits	2	2	At Health Facility	1	Live Birth-LB	1	Already on ART	1	2018-07-12	1c = TDF/3TC/DTG	3		2022-08-02	Pregnant	2022-01-31				180	185	-5	No	2	NA	3	2022-02-05	5
71	IMPORTA-0881	1	2022-09-11	Maleth Maker Manyiel	Mary Immaculate Mapourdit Hospital	3	2021-09-14	29	majok	Married Polygamous	2	Housewife	1	3	3		15	1	Newly tested at ANC	1	1 visit	1	1	At home	2	Live Birth-LB	1	New on ART -- in pregnancy	2	2021-09-13	1c = TDF/3TC/DTG	3		2021-09-14	Pregnant	2022-03-14	181	6+ months	3	180	239	-59	NA	3	NA	3	2022-05-13	60	241
72	IMPORTA-0882	1	2022-09-11	Maleth Maker Manyiel	Mary Immaculate Mapourdit Hospital	3	2021-09-14	18	maboradhiak	Married Monogamous	2	Student	1	3	1	44630			Newly tested at ANC	1	1 visit	1	1	At home	2	Live Birth-LB	1	New on ART -- in pregnancy	2	2021-09-14	1c = TDF/3TC/DTG	3		2021-09-14	Pregnant	2022-03-14	181	6+ months	3	180	200	-20	NA	3	NA	3	2022-03-04	-10	171
74	IMPORTA-0884	1	2022-09-11	Maleth Maker Manyiel	Mary Immaculate Mapourdit Hospital	3	2021-09-08	26	mapuordit	Married Polygamous	2	Housewife	1	3	3		8	1	Known Pos on ART	2	1 visit	1	1	At Health Facility	1	Live Birth-LB	1	Already on ART	1	2021-08-19	1c = TDF/3TC/DTG	3		2021-09-08	Pregnant	2021-04-08				180	223	-43	Yes	1	Suppressed	1	2022-05-27	414	261
75	IMPORTA-0885	1	2022-09-11	Maleth Maker Manyiel	Mary Immaculate Mapourdit Hospital	3	2021-09-21	23	mapuordit	Married Monogamous	2	Housewife	1	2	3		8	1	Newly tested at ANC	1	1 visit	1	1	At Health Facility	1	Live Birth-LB	1	New on ART -- in pregnancy	2	2021-09-21	1c = TDF/3TC/DTG	3		2021-09-21	Pregnant	2022-03-22	182	6+ months	3	180	216	-36	NA	3	NA	3	2022-04-28	37	219
76	IMPORTA-0886	1	2022-09-11	Maleth Maker Manyiel	Mary Immaculate Mapourdit Hospital	3	2021-09-06	17	ngop	Married Monogamous	2	Housewife	1	4	1		14	1	Newly tested at ANC	1	2 visits	2	2	At Health Facility	1	Live Birth-LB	1	New on ART -- in pregnancy	2	2021-09-06	1c = TDF/3TC/DTG	3		2022-09-06	Pregnant	2021-03-07				180	180	0	NA	3	NA	3	2022-03-07	365
77	IMPORTA-0887	1	2022-09-11	Maleth Maker Manyiel	Mary Immaculate Mapourdit Hospital	3	2022-09-08	23	ifuel	Married Monogamous	2	Housewife	1	2	3		20	2	Newly tested at ANC	1	1 visit	1	1	At home	2	Live Birth-LB	1	New on ART -- in pregnancy	2	2021-09-08	1c = TDF/3TC/DTG	3		2021-09-08	Pregnant	2022-03-08	181	6+ months	3	180	206	-26	NA	3	NA	3	2022-04-04	27	208
78	IMPORTA-0888	1	2022-09-11	Maleth Maker Manyiel	Mary Immaculate Mapourdit Hospital	3	2021-09-21	20	Ahiauguek	Married Monogamous	2	Housewife	1	2	3		15	1	Newly tested at ANC	1	2 visits	2	2					New on ART -- in pregnancy	2	2021-09-21	1c = TDF/3TC/DTG	3		2021-09-21	Pregnant	2022-03-22	182	6+ months	3	180	180	0	NA	3	NA	3	2022-02-15	-35	147
79	IMPORTA-0889	1	2022-09-11	Maleth Maker Manyiel	Mary Immaculate Mapourdit Hospital	3	2021-09-09	31	aluakluak	Married Polygamous	2	Housewife	1	3	3		25	2	Known Pos on ART	2	1 visit	1	1			Live Birth-LB	1	Already on ART	1	2018-09-13	1c = TDF/3TC/DTG	3		2021-09-09	Pregnant	2022-03-08	180	6+ months	3	180	210	-30	Yes	1	Unsuppressed	2	2022-04-07	30	210
80	IMPORTA-0890	1	2022-09-11	Maleth Maker Manyiel	Mary Immaculate Mapourdit Hospital	3	2021-11-02	20	Atiriu	Married Monogamous	2	Housewife	1	2	3		8	1	Newly tested at ANC	1	1 visit	1	1	At home	2	Live Birth-LB	1	New on ART -- in pregnancy	2	2021-11-02	1c = TDF/3TC/DTG	3		2021-11-02	Pregnant	2022-05-02	181	6+ months	3	180	180	0	NA	3	NA	3	2022-04-12	-20	161
81	IMPORTA-0891	1	2022-09-11	Maleth Maker Manyiel	Mary Immaculate Mapourdit Hospital	3	2021-10-14	30	kathier	Married Polygamous	2	Housewife	1	3	3		24	2	Known Pos on ART	2	1 visit	1	1	At home	2	Live Birth-LB	1	Already on ART	1	2014-10-15	1c = TDF/3TC/DTG	3		2021-10-14	Pregnant	2022-04-14	182	6+ months	3	180	180	0	Yes	1	Suppressed	1	2022-03-15	-30	152
82	IMPORTA-0892	1	2022-09-11	Maleth Maker Manyiel	Mary Immaculate Mapourdit Hospital	3		31	aluakluak	Widowed	3	Housewife	1	3	3		25	2	Known Pos on ART	2	2 visits	2	2	At Health Facility	1	Live Birth-LB	1	Already on ART	1	2015-08-28	1c = TDF/3TC/DTG	3			Pregnant	2022-05-31	44712	6+ months	3	180	180	0	Yes	1	Suppressed	1	2022-04-26	-35	44677
83	IMPORTA-0893	1	2022-09-11	Maleth Maker Manyiel	Mary Immaculate Mapourdit Hospital	3	2021-08-15	30	majok	Married Polygamous	2	Housewife	1	3	3		25	2	Known Pos on ART	2	2 visits	2	2	At Health Facility	1	Live Birth-LB	1	Already on ART	1	2015-10-08	1c = TDF/3TC/DTG	3		2021-08-15	Pregnant	2022-02-15	184	6+ months	3	180	204	-24	Yes	1	Unsuppressed	2	2022-03-11	24	208
84	IMPORTA-0894	1	2022-09-11	Maleth Maker Manyiel	Mary Immaculate Mapourdit Hospital	3	2021-07-26	22	paduiny	Married Monogamous	2	Housewife	1	3	3		24	2	Known Pos on ART	2	1 visit	1	1	At Health Facility	1	Live Birth-LB	1	Already on ART	1	2019-05-10	1c = TDF/3TC/DTG	3		2021-07-26	Pregnant	2022-01-23	181	6+ months	3	180	180	0	Yes	1	Unsuppressed	2	2022-01-23	0	181
85	IMPORTA-0895	1	2022-09-11	Maleth Maker Manyiel	Mary Immaculate Mapourdit Hospital	3		37	Ramawan	Married Polygamous	2	Housewife	1	3	3		20	2	Known Pos on ART	2	1 visit	1	1	At home	2	Live Birth-LB	1	Already on ART	1	2019-12-05	1c = TDF/3TC/DTG	3			Pregnant	2022-04-06	44657	6+ months	3	180	180	0	No	2	NA	3	2022-02-02	-63	44594
86	IMPORTA-0896	1	2022-09-11	Maleth Maker Manyiel	Mary Immaculate Mapourdit Hospital	3	2021-06-23	23	majok	Married Monogamous	2	Housewife	1	3	3				Known Pos on ART	2	1 visit	1	1	At home	2	Live Birth-LB	1	Already on ART	1	2019-09-04	1c = TDF/3TC/DTG	3		2021-06-23	Pregnant	2021-12-20	180	6+ months	3	180	180	0	Yes	1	Unsuppressed	2	2021-12-20	0	180
88	IMPORTA-0898	1	2022-09-11	Maleth Maker Manyiel	Mary Immaculate Mapourdit Hospital	3	2021-11-29	25	imor	Married Monogamous	2	Housewife	1	3	3				Newly tested at ANC	1	2 visits	2	2	At Health Facility	1			New on ART -- in pregnancy	2	2021-11-29	1c = TDF/3TC/DTG	3		2021-11-29	Pregnant	2022-05-27	179	3-5 months	2	180	180	0	NA	3	NA	3	2022-04-25	-32	147
89	IMPORTA-0899	1	2022-09-11	Maleth Maker Manyiel	Mary Immaculate Mapourdit Hospital	3		30	hor	Married Polygamous	2	Housewife	1	3	3		20	2	Known Pos on ART	2	1 visit	1	1	At home	2	Live Birth-LB	1	Already on ART	1	2014-10-31	1c = TDF/3TC/DTG	3			Pregnant	2022-04-06	44657	6+ months	3	120	120	0	Yes	1	Suppressed	1	2022-04-06	0	44657
90	IMPORTA-0900	1	2022-09-11	Maleth Maker Manyiel	Mary Immaculate Mapourdit Hospital	3		22	muolueth	Married Monogamous	2	Housewife	1	2	3		18	2	Known Pos on ART	2	1 visit	1	1	At home	2			Already on ART	1	2020-01-02	1c = TDF/3TC/DTG	3		2021-12-21	Pregnant	2022-06-21	182	6+ months	3	180	180	0	No	2	NA	3		44733
91	IMPORTA-0901	1	2022-09-11	Maleth Maker Manyiel	Mary Immaculate Mapourdit Hospital	3	2021-12-07	20	Alel	Married Monogamous	2	Housewife	1	3	3				Newly tested at ANC	1	1 visit	1	1	At Health Facility	1	Live Birth-LB	1	New on ART -- in pregnancy	2	2021-12-07	1c = TDF/3TC/DTG	3		2021-12-07	Pregnant	2022-06-06	181	6+ months	3	180	270	-90	NA	3	NA	3		44718
92	IMPORTA-0902	1	2022-09-11	Maleth Maker Manyiel	Mary Immaculate Mapourdit Hospital	3	2021-12-13	21	paduinir	Married Monogamous	2	Housewife	1	2	3		18	2	Known Pos on ART	2	2 visits	2	2	At home	2	Live Birth-LB	1	Already on ART	1	2018-09-27	1c = TDF/3TC/DTG	3		2021-12-13	Pregnant	2022-02-14	63	<3 months	1	60	90	-30	No	2	NA	3	2022-03-14	28	91
93	IMPORTA-0903	1	2022-09-11	Maleth Maker Manyiel	Mary Immaculate Mapourdit Hospital	3	2021-12-13	30	majok	Married Polygamous	2	Housewife	1	3	3		28	2	Known Pos on ART	2	1 visit	1	1	At Health Facility	1			Already on ART	1	2016-10-03	1c = TDF/3TC/DTG	3		2021-12-13	Pregnant	2022-06-28	197	6+ months	3	180	180	0	No	2	NA	3	2022-06-28	0	197
94	IMPORTA-0904	1	2022-09-11	Maleth Maker Manyiel	Mary Immaculate Mapourdit Hospital	3	2021-08-09	30	diocese	Married Monogamous	2	Housewife	1	3	3		25	2	Newly tested at ANC	1	1 visit	1	1	At home	2	Live Birth-LB	1	New on ART -- in pregnancy	2	2021-08-09	1c = TDF/3TC/DTG	3		2021-08-09	Pregnant	2022-02-07	182	6+ months	3	180	385	-205	NA	3	NA	3		44599
95	IMPORTA-0905	1	2022-09-11	Maleth Maker Manyiel	Mary Immaculate Mapourdit Hospital	3	2021-10-19	35	ngop	Married Monogamous	2	Housewife	1	3	3		11	1	Newly tested at ANC	1	1 visit	1	1			Live Birth-LB	1	New on ART -- in pregnancy	2	2021-10-19	1c = TDF/3TC/DTG	3		2021-10-19	Pregnant	2022-04-19	182	6+ months	3	180	325	-145	No	2	NA	3		44670
96	IMPORTA-0906	1	2022-09-11	Maleth Maker Manyiel	Mary Immaculate Mapourdit Hospital	3	2021-11-11	23	Akot	Married Monogamous	2	Housewife	1	3	3		17	2	Newly tested at ANC	1	1 visit	1	1	At home	2	Live Birth-LB	1	New on ART -- in pregnancy	2	2021-11-11	1c = TDF/3TC/DTG	3		2021-11-11	Pregnant	2021-05-11				180	300	-120	NA	3	NA	3		44327
97	IMPORTA-0907	1	2022-08-04	Maleth Maker Manyiel	Mary Immaculate Mapourdit Hospital	3	2021-11-11	24	ameth	Married Monogamous	2	Housewife	1	3	3		12	1	Newly tested at ANC	1	1 visit	1	1	At Health Facility	1	Live Birth-LB	1	New on ART -- in pregnancy	2	2021-11-11	1c = TDF/3TC/DTG	3		2021-11-11	Pregnant	2022-05-11	181	6+ months	3	180	300	-120	NA	3	NA	3		44692
98	IMPORTA-0908	1	2022-09-11	Maleth Maker Manyiel	Mary Immaculate Mapourdit Hospital	3	2021-11-29	20	aduel	Married Monogamous	2	Housewife	1	2	5		17	2	Newly tested at ANC	1	2 visits	2	2	At Health Facility	1	Live Birth-LB	1	New on ART -- postpartum	2	2021-11-29	1c = TDF/3TC/DTG	3		2021-11-29	Breastfeeding	2022-05-27	179	3-5 months	2	180	284	-104	NA	3	NA	3		44708
99	IMPORTA-0909	1	2022-08-11	Maleth Maker Manyiel	Mary Immaculate Mapourdit Hospital	3	2021-11-02	22	rokbet	Married Monogamous	2	Housewife	1	2	3				Newly tested at ANC	1	1 visit	1	1	At home	2	Live Birth-LB	1	New on ART -- in pregnancy	2	2021-11-02	1c = TDF/3TC/DTG	3		2021-11-02	Pregnant	2022-05-02	181	6+ months	3	180	300	-120	NA	3	NA	3		44683
100	IMPORTA-0910	1	2022-09-11	Maleth Maker Manyiel	Mary Immaculate Mapourdit Hospital	3	2021-11-15	30	majok	Widowed	3	Housewife	1	3	3				Newly tested at ANC	1	1 visit	1	1	At Health Facility	1	Live Birth-LB	1	New on ART -- in pregnancy	2	2021-11-15	1c = TDF/3TC/DTG	3		2021-11-15	Pregnant	2022-05-13	179	3-5 months	2	180	298	-118	NA	3	NA	3		44694
101	IMPORTA-0911	1	2022-09-12	Maleth Maker Manyiel	Mary Immaculate Mapourdit Hospital	3	2021-11-15	28	Ameth	Married Monogamous	2	Housewife	1	3	3		24	2	Newly tested at ANC	1	1 visit	1	1			Live Birth-LB	1	New on ART -- in pregnancy	2	2021-11-15	1c = TDF/3TC/DTG	3		2021-11-15	Pregnant	2022-05-13	179	3-5 months	2	180	302	-122	NA	3	NA	3		44694
102	IMPORTA-0912	1	2022-09-12	Maleth Maker Manyiel	Mary Immaculate Mapourdit Hospital	3	2021-10-05	22	Gunganyier	Widowed	3	Housewife	1	3	3		9	1	Newly tested at ANC	1	1 visit	1	1	At Health Facility	1	Live Birth-LB	1	Already on ART	1	2021-10-05	1c = TDF/3TC/DTG	3		2021-10-05	Pregnant	2022-04-05	182	6+ months	3	180	340	-160	NA	3	NA	3		44656
103	IMPORTA-0913	1	2022-09-12	Maleth Maker Manyiel	Mary Immaculate Mapourdit Hospital	3	2021-08-12	22	jielic	Married Polygamous	2	Housewife	1	2	3		20	2	Newly tested at ANC	1	1 visit	1	1	At Health Facility	1			New on ART -- in pregnancy	2		1c = TDF/3TC/DTG	3		2021-10-12	Pregnant	2022-04-12	182	6+ months	3	180	330	-150	NA	3	NA	3		44663
104	IMPORTA-0914	1	2022-09-12	Maleth Maker Manyiel	Mary Immaculate Mapourdit Hospital	3	2021-11-05	30	mapuordit	Married Polygamous	2	Housewife	1	3	3				Known Pos on ART	2	1 visit	1	1	At home	2	Live Birth-LB	1	Already on ART	1	2019-08-14	1c = TDF/3TC/DTG	3		2021-11-05	Pregnant	2022-05-05	181	6+ months	3	180	240	-60	Yes	1	Unsuppressed	2	2022-07-05	61	242
106	IMPORTA-0916	1	2022-09-12	Maleth Maker Manyiel	Mary Immaculate Mapourdit Hospital	3	2021-09-16	16	Tuomyrak	Married Monogamous	2	Housewife	1	1	1		20	2	Newly tested at ANC	1	1 visit	1	1	At Health Facility	1	Live Birth-LB	1	New on ART -- in pregnancy	2	2021-09-16	1c = TDF/3TC/DTG	3		2021-09-16	Pregnant	2022-03-17	182	6+ months	3	180	358	-178	NA	3	NA	3		44637
107	IMPORTA-0917	1	2022-09-12	Maleth Maker Manyiel	Mary Immaculate Mapourdit Hospital	3	2021-08-03	20	Anuol	Married Monogamous	2	Housewife	1	1	2		10	1	Newly tested at ANC	1	1 visit	1	1	At Health Facility	1	Live Birth-LB	1	New on ART -- in pregnancy	2	2021-08-03	1c = TDF/3TC/DTG	3		2021-08-03	Pregnant	2022-02-01	182	6+ months	3	180	434	-254	NA	3	NA	3		44593
108	IMPORTA-0918	1	2022-09-12	Maleth Maker Manyiel	Mary Immaculate Mapourdit Hospital	3	2021-08-27	35	golyiel	Married Polygamous	2	Housewife	1	3	3		19	2	Newly tested at ANC	1	1 visit	1	1	At Health Facility	1	Live Birth-LB	1	New on ART -- in pregnancy	2	2021-08-08	1c = TDF/3TC/DTG	3		2022-08-27	Pregnant	2022-02-25				180	420	-240	NA	3	NA	3		44617
110	IMPORTA-0920	1	2022-09-12	Maleth Maker Manyiel	Mary Immaculate Mapourdit Hospital	3	2021-08-19	43	jieric	Married Polygamous	2	Housewife	1	3	3		25	2	Known Pos on ART	2	1 visit	1	1	At Health Facility	1	Live Birth-LB	1	Already on ART	1	2018-08-13	1c = TDF/3TC/DTG	3		2021-08-19	Pregnant	2022-02-18	183	6+ months	3	180	386	-206	No	2	NA	3		44610
111	IMPORTA-0921	1	2022-09-12	Maleth Maker Manyiel	Mary Immaculate Mapourdit Hospital	3	2021-08-19	19	ngop	Married Monogamous	2	Housewife	1	1	2	44597	15	1	Newly tested at ANC	1	1 visit	1	1	At Health Facility	1	Live Birth-LB	1	New on ART -- in pregnancy	2	2021-08-18	1c = TDF/3TC/DTG	3		2021-08-19	Pregnant	2022-02-16	181	6+ months	3	180	380	-200	NA	3	NA	3		44608
112	IMPORTA-0922	1	2022-09-12	Maleth Maker Manyiel	Mary Immaculate Mapourdit Hospital	3	2022-01-11	20	ngop	Married Monogamous	2	Housewife	1	2	3				Newly tested at ANC	1	1 visit	1	1	At home	2	Live Birth-LB	1	New on ART -- in pregnancy	2	2022-01-11	1c = TDF/3TC/DTG	3		2022-01-11	Pregnant	2022-07-12	182	6+ months	3	180	200	-20	NA	3	NA	3	2022-08-02	21	203
113	IMPORTA-0923	1	2022-09-12	Maleth Maker Manyiel	Mary Immaculate Mapourdit Hospital	3	2021-03-02	25	Ahiauajuek	Married Monogamous	2	Housewife	1	3	3		8	1	Known Pos on ART	2	1 visit	1	1	At home	2	Live Birth-LB	1	Already on ART	1	2021-03-02	1c = TDF/3TC/DTG	3		2021-03-02	Pregnant	2021-09-02	184	6+ months	3	180	269	-89	NA	3	NA	3	2021-09-11	9	193
114	IMPORTA-0924	1	2022-09-12	Maleth Maker Manyiel	Mary Immaculate Mapourdit Hospital	3	2022-01-25	38	pokic	Married Polygamous	2	Housewife	1	3	3		25	2	Known Pos not on ART	2	2 visits	2	2	At home	2	Live Birth-LB	1	Already on ART	1	2016-06-14	1c = TDF/3TC/DTG	3		2022-01-25	Breastfeeding	2022-07-22	178	3-5 months	2	180	180	0	No	2	NA	3	2022-07-29	7	185
115	IMPORTA-0925	1	2022-09-12	Maleth Maker Manyiel	Mary Immaculate Mapourdit Hospital	3	2021-10-14	17	kacpar	Married Monogamous	2	Housewife	1	4	1				Newly tested at ANC	1	2 visits	2	2	At home	2	Live Birth-LB	1	New on ART -- in pregnancy	2	2020-02-18	1c = TDF/3TC/DTG	3		2021-10-14	Pregnant	2021-08-13				180	225	-45	NA	3	NA	3	2022-05-30	290	228
116	IMPORTA-0926	1	2022-09-12	Maleth Maker Manyiel	Mary Immaculate Mapourdit Hospital	3	2022-08-16	22	pulkar	Married Monogamous	2	Housewife	1	3	3		2	1	Known Pos on ART	2	1 visit	1	1	At home	2	Live Birth-LB	1	Already on ART	1	2020-07-14	1c = TDF/3TC/DTG	3		2021-08-16	Pregnant	2022-02-15	183	6+ months	3	180	187	-7	No	2	NA	3	2022-02-22	7	190
117	IMPORTA-0927	1	2022-09-12	Maleth Maker Manyiel	Mary Immaculate Mapourdit Hospital	3	2022-01-29	22	mapuordit	Married Polygamous	2	Housewife	1	1	2		15	1	Known Pos on ART	2	1 visit	1	1	At Health Facility	1			Already on ART	1	2021-05-15	1c = TDF/3TC/DTG	3		2022-01-29	Pregnant	2022-07-27	179	3-5 months	2	180	180	0	NA	3	NA	3	2022-06-20	-37	142
119	IMPORTA-0928	1	2022-09-12	Maleth Maker Manyiel	Mary Immaculate Mapourdit Hospital	3	2022-01-27	30	mapuordit	Married Monogamous	2	Housewife	1	3	3				Known Pos on ART	2	1 visit	1	1	At Health Facility	1	Live Birth-LB	1	Already on ART	1	2019-07-11	1c = TDF/3TC/DTG	3		2022-01-27	Pregnant	2022-07-28	182	6+ months	3	180	112	68	Yes	1	Suppressed	1	2022-05-20	-69	113
119	IMPORTA-0929	1	2022-09-12	Maleth Maker Manyiel	Mary Immaculate Mapourdit Hospital	3	2021-12-21	28	majok	Married Monogamous	2	Housewife	1	3	3		25	2	Newly tested at ANC	1	2 visits	2	2	At home	2	Live Birth-LB	1	New on ART -- postpartum	2	2021-12-21	1c = TDF/3TC/DTG	3		2021-12-21	Breastfeeding	2022-06-21	182	6+ months	3	180	260	-80	NA	3	NA	3		44733
120	IMPORTA-0930	1	2022-09-12	Maleth Maker Manyiel	Mary Immaculate Mapourdit Hospital	3	2022-01-11	25	Aluakluak	Married Monogamous	2	Housewife	1	3	4		25	2	Newly tested at ANC	1	2 visits	2	2	At home	2	Live Birth-LB	1	New on ART -- postpartum	2	2022-01-11	1c = TDF/3TC/DTG	3		2022-01-11	Breastfeeding	2022-07-11	181	6+ months	3	180	243	-63	NA	3	NA	3		44753
121	IMPORTA-0931	1	2022-09-12	Maleth Maker Manyiel	Mary Immaculate Mapourdit Hospital	3	2022-01-17	41	Ahiauajuek	Married Polygamous	2	Housewife	1	3	3		25	2	Known Pos on ART	2	1 visit	1	1	At home	2	Live Birth-LB	1	Already on ART	1	2018-06-04	1c = TDF/3TC/DTG	3		2022-01-17	Pregnant	2022-07-17	181	6+ months	3	180	188	-8	No	2	NA	3	2022-07-25	8	189
126	IMPORTA-0936	1	2022-09-12	Maleth Maker Manyiel	Mary Immaculate Mapourdit Hospital	3	2021-07-22	25	Aluakluak	Married Monogamous	2	Housewife	1	3	3		14	1	Newly tested at ANC	1	1 visit	1	1	At home	2	Live Birth-LB	1	New on ART -- in pregnancy	2	2021-07-22	1c = TDF/3TC/DTG	3		2021-07-22	Pregnant	2022-01-20	182	6+ months	3	180	261	-81	NA	3	NA	3	2022-04-11	81	263
127	IMPORTA-0937	1	2022-09-12	Maleth Maker Manyiel	Mary Immaculate Mapourdit Hospital	3	2021-07-01	19	mapuordit	Married Monogamous	2	Housewife	1	1	2				Newly tested at ANC	1	1 visit	1	1	At Health Facility	1	Live Birth-LB	1	New on ART -- in pregnancy	2	2021-07-01	1c = TDF/3TC/DTG	3		2021-07-01	Pregnant	2021-12-31	183	6+ months	3	180	229	-49	NA	3	NA	3	2022-08-19	231	414
128	IMPORTA-0938	1	2022-09-12	Maleth Maker Manyiel	Mary Immaculate Mapourdit Hospital	3	2021-08-27	38	Ameth	Widowed	3	Housewife	1	3	3		15	1	Newly tested at ANC	1	1 visit	1	1	At home	2	Live Birth-LB	1	New on ART -- in pregnancy	2	2021-07-27	1c = TDF/3TC/DTG	3		2021-07-27	Pregnant	2022-01-25	182	6+ months	3	180	292	-112	NA	3	NA	3	2022-05-17	112	294
129	IMPORTA-0939	1	2022-09-12	Maleth Maker Manyiel	Mary Immaculate Mapourdit Hospital	3	2021-07-01	33	mageng	Married Monogamous	2	Housewife	1	3	3		20	2	Newly tested at ANC	1	1 visit	1	1	At Health Facility	1	Live Birth-LB	1	New on ART -- in pregnancy	2	2021-07-01	1c = TDF/3TC/DTG	3		2021-07-01	Pregnant	2021-12-31	183	6+ months	3	180	252	-72	NA	3	NA	3		44561
130	IMPORTA-0940	1	2022-09-12	Maleth Maker Manyiel	Mary Immaculate Mapourdit Hospital	3	2021-07-28	24	mapuordit	Divorced/separated	3	Housewife	1	2	3		14	1	Newly tested at ANC	1	1 visit	1	1	At home	2	Live Birth-LB	1	New on ART -- in pregnancy	2	2021-07-28	1c = TDF/3TC/DTG	3		2021-07-28	Pregnant	2022-01-26	182	6+ months	3	180	394	-214	NA	3	NA	3		44587
131	IMPORTA-0941	1	2022-09-12	Maleth Maker Manyiel	Mary Immaculate Mapourdit Hospital	3	2021-05-03	20	mapuordit	Married Monogamous	2	Housewife	1	1	2		20	2	Newly tested at ANC	1	1 visit	1	1	At home	2	Live Birth-LB	1	New on ART -- in pregnancy	2	2021-05-03	1c = TDF/3TC/DTG	3		2021-05-03	Pregnant	2021-11-03	184	6+ months	3	180	490	-310	NA	3	NA	3		44503
132	IMPORTA-0942	1	2022-09-12	Maleth Maker Manyiel	Mary Immaculate Mapourdit Hospital	3	2021-05-06	20	Anuol	Married Monogamous	2	Housewife	1	2	3		20	2	Newly tested at ANC	1	1 visit	1	1			Live Birth-LB	1	New on ART -- in pregnancy	2	2021-05-06	1c = TDF/3TC/DTG	3		2021-05-06	Pregnant	2021-11-05	183	6+ months	3	180	488	-308	NA	3	NA	3		44505
1	IMPORTA-0943	1	2022-08-30	Akech David Awan	Kiir Mayardit Hospital	2	2019-08-18	25	guei adukam	Married Monogamous	2	Housewife	1	2	3		8	1	Newly tested at ANC	1	1 visit	1	1	At Health Facility	1	Live Birth-LB	1	New on ART -- in pregnancy	2	2022-10-18	1c = TDF/3TC/DTG	3		2019-10-18	Pregnant	2020-04-18	183	6+ months	3	180	180	0	NA	3	NA	3	2021-06-21	429	612
2	IMPORTA-0944	1	2022-08-30	Akech David Awan	Kiir Mayardit Hospital	2	2019-11-11	39	akuac	Married Monogamous	2	Housewife	1				18	2	Newly tested at ANC	1	1 visit	1	1	At home	2	Live Birth-LB	1	New on ART -- in pregnancy	2	2019-11-11	1c = TDF/3TC/DTG	3		2019-11-11	Pregnant	2020-02-11	92	3-5 months	2	180	180	0					2022-05-06	815	907
3	IMPORTA-0945	1	2022-08-30	Akech David Awan	Kiir Mayardit Hospital	2	2019-12-26	20	Akuac	Married Monogamous	2	Housewife	1	1					Breastfeeding	1	1 visit	1	1	At Health Facility	1			New on ART -- postpartum	2	2019-12-26	1c = TDF/3TC/DTG	3		2020-12-26	Breastfeeding	2020-06-26				180	180	0					2020-09-25	91
4	IMPORTA-0946	1	2022-08-30	Akech David Awan	Kiir Mayardit Hospital	2	2019-12-30	18	maborngap	Married Monogamous	2	Housewife	1		1		8	1	Newly tested at ANC	1	2 visits	2	2			Live Birth-LB	1	New on ART -- in pregnancy	2		1c = TDF/3TC/DTG	3		2019-12-30	Pregnant	2020-06-30	183	6+ months	3	180	180	0					2021-01-21	205	388
5	IMPORTA-0947	1	2020-08-10	Akech David Awan	Kiir Mayardit Hospital	2	2020-08-10	33	Akuac	Married Polygamous	2	Housewife	1				8	1	Newly tested at ANC	1	1 visit	1	1	At Health Facility	1	Live Birth-LB	1	New on ART -- in pregnancy	2		1c = TDF/3TC/DTG	3		2020-08-10	Pregnant	2021-02-10	184	6+ months	3	180	180	0	Yes				2021-08-16	187	371
6	IMPORTA-0948	1	2022-08-30	Akech David Awan	Kiir Mayardit Hospital	2	2020-11-10	26	makurinric	Married Monogamous	2	Housewife	1	3			28	2	Newly tested at ANC	1	1 visit	1	1			Live Birth-LB	1	New on ART -- in pregnancy	2	2020-11-10	1c = TDF/3TC/DTG	3		2020-11-10	Pregnant	2020-05-10				180	180	0	NA	3	NA	3	2020-05-07	-3
7	IMPORTA-0949	1	2022-08-30	Akech David Awan	Kiir Mayardit Hospital	2	2020-08-26	18	akuac	Married Monogamous	2	Housewife	1	2	2				Newly tested at ANC	1				At Health Facility	1			New on ART -- in pregnancy	2	2020-08-28	1c = TDF/3TC/DTG	3		2020-08-26	Pregnant	2021-02-26	184	6+ months	3	180	180	0	NA	3	NA	3	2021-02-17	-9	175
8	IMPORTA-0950	1	2022-08-20	Akech David Awan	Kiir Mayardit Hospital	2	2020-08-20	24	maborngaap	Married Monogamous	2	Housewife	1				38	2	Newly tested at ANC	1				At Health Facility	1	Live Birth-LB	1	New on ART -- in pregnancy	2		1c = TDF/3TC/DTG	3		2020-08-20	Pregnant	2021-02-19	183	6+ months	3	180	180	0	No	2	NA	3	2021-02-19	0	183
9	IMPORTA-0951	1	2022-08-30	Akech David Awan	Kiir Mayardit Hospital	2	2021-02-11	30	madol Akoc	Married Polygamous	2	Farming	2	5	4				Newly tested at ANC	1	2 visits	2	2	At home	2	Live Birth-LB	1	New on ART -- in pregnancy	2	2021-02-11	1c = TDF/3TC/DTG	3		2021-02-11	Pregnant	2021-08-11	181	6+ months	3	180	180	0					2022-01-01	143	324
10	IMPORTA-0952	1	2022-08-30	Akech David Awan	Kiir Mayardit Hospital	2	2021-02-25	27	luak mayual	Married Polygamous	2	Housewife	1	4	6		18	2	Newly tested at ANC	1	1 visit	1	1	At home	2	Live Birth-LB	1	New on ART -- in pregnancy	2		1c = TDF/3TC/DTG	3		2021-02-25	Pregnant	2021-08-25	181	6+ months	3	180	180	0	Yes	1	Suppressed	1	2021-08-09	-16	165
11	IMPORTA-0953	1	2021-03-09	Akech David Awan	Kiir Mayardit Hospital	2	2021-03-09	26	atiaba/cumcok	Married Monogamous	2	Housewife	1	1	1		38	2	Newly tested at ANC	1	1 visit	1	1	At home	2	Live Birth-LB	1	New on ART -- in pregnancy	2		1c = TDF/3TC/DTG	3		2021-03-09	Pregnant	2021-09-09	184	6+ months	3	180	180	0	No	2	NA	3	2021-09-09	0	184
11	IMPORTA-0954	1	2022-08-30	Akech David Awan	Kiir Mayardit Hospital	2	2021-04-06	38	akuac	Married Monogamous	2	Housewife	1	6			18	2	Newly tested at ANC	1	2 visits	2	2			Live Birth-LB	1	New on ART -- postpartum	2	2021-04-06	1c = TDF/3TC/DTG	3		2021-04-06	Pregnant	2021-10-06	183	6+ months	3	180	180	0	NA	3	NA	3	2022-04-01	177	360
13	IMPORTA-0955	1	2022-08-30	Akech David Awan	Kiir Mayardit Hospital	2	2021-04-13	20	akuac	Married Monogamous	2	Housewife	1	1	3		32	2	Newly tested at ANC	1	1 visit	1	1	At home	2			New on ART -- in pregnancy	2	2021-04-13	1c = TDF/3TC/DTG	3		2021-04-13	Pregnant	2021-10-13	183	6+ months	3	180	180	0	NA	3	NA	3	2021-10-13	0	183
14	IMPORTA-0956	1	2022-08-30	Akech David Awan	Kiir Mayardit Hospital	2	2021-09-20	20	PDU	Married Monogamous	2	Housewife	1	1	5				Newly tested at ANC	1	1 visit	1	1	At home	2	Still Birth-MSB or FSB	2	New on ART -- in pregnancy	2		1c = TDF/3TC/DTG	3		2021-09-20	Pregnant	2022-03-21	182	6+ months	3	180	180	0					2022-07-14	115	297
15	IMPORTA-0957	1	2022-08-30	Akech David Awan	Kiir Mayardit Hospital	2	2021-11-08	26	malual akam	Married Polygamous	2	Housewife	1	5	2		14	1	Newly tested at ANC	1	2 visits	2	2			Neonatal Death-ND	3	New on ART -- in pregnancy	2	2021-11-08	1c = TDF/3TC/DTG	3		2021-11-08	Pregnant	2022-05-06	179	3-5 months	2	180	180	0	NA	3	NA	3	2022-05-06	0	179
16	IMPORTA-0958	1	2022-08-30	Akech David Awan	Kiir Mayardit Hospital	2	2021-11-22	38	Akuac	Married Monogamous	2	Housewife	1	3					Newly tested at ANC	1						Live Birth-LB	1	New on ART -- in pregnancy	2		1c = TDF/3TC/DTG	3		2021-11-22	Pregnant	2022-05-22	181	6+ months	3	180	180	0	NA	3	NA	3	2022-06-13	22	203
17	IMPORTA-0959	1	2022-08-30	Akech David Awan	Kiir Mayardit Hospital	2	2020-05-21	35	malual akam	Married Polygamous	2	Housewife	1		2		13	1	Newly tested at ANC	1				At home	2	Neonatal Death-ND	3	New on ART -- in pregnancy	2		1c = TDF/3TC/DTG	3		2020-05-21	Pregnant	2020-11-20	183	6+ months	3	180	180	0	NA	3	NA	3	2021-08-06	259	442
18	IMPORTA-0960	1	2021-02-01	Akech David Awan	Kiir Mayardit Hospital	2	2021-02-01	19	PDU	Married Monogamous	2	Housewife	1		7		17	2	Newly tested at ANC	1	1 visit	1	1	At Health Facility	1			New on ART -- in pregnancy	2		1c = TDF/3TC/DTG	3		2021-02-01	Pregnant	2021-07-01	150	3-5 months	2	180	180	0	NA	3	NA	3	2021-08-26	56	206
19	IMPORTA-0961	1	2022-08-30	Akech David Awan	Kiir Mayardit Hospital	2	2020-11-24	34	panawac	Married Polygamous	2	Housewife	1	3					Known Pos on ART	2	2 visits	2	2	At Health Facility	1			Already on ART	1		1c = TDF/3TC/DTG	3		2020-11-20	Pregnant	2021-08-20	273	6+ months	3	180	180	0					2021-05-24	-88	185
20	IMPORTA-0962	1	2022-08-30	Akech David Awan	Kiir Mayardit Hospital	2	2021-01-26	38	culicok	Married Monogamous	2	Housewife	1		2		11	1	Newly tested at ANC	1	3 visits	3	3	At home	2	Live Birth-LB	1	New on ART -- postpartum	2		1c = TDF/3TC/DTG	3		2021-01-26	Pregnant	2021-07-26	181	6+ months	3	180	180	0	NA	3	NA	3	2021-07-26	0	181
76	IMPORTA-0963	1	2022-08-03	Wani Moses Yanga	Munuki PHCC	1	2020-09-09	24	munuki bb	Married Monogamous	2	Housewife	1	2	3	44198	24	2	Known Pos on ART	2	1 visit	1	1	At Health Facility	1	Neonatal Death-ND	3	Already on ART	1	2019-08-19	1c = TDF/3TC/DTG	3		2020-09-09	Pregnant	2021-03-08	180	6+ months	3	180	180	0	NA	3	NA	3	2021-06-05	89	269
77	IMPORTA-0964	1	2022-08-03	Wani Moses Yanga	Munuki PHCC	1	2020-09-04	22	munuki bb	Married Monogamous	2	Business (Man/Women)/trader	2	3	3	44254			Newly tested at ANC	1	4 or more visits	4	3	At Health Facility	1	Live Birth-LB	1	New on ART -- in pregnancy	2	2020-09-04	1c = TDF/3TC/DTG	3		2020-09-04	Pregnant	2021-03-04	181	6+ months	3	180	180	0	NA	3	NA	3	2021-03-04	0	181
78	IMPORTA-0965	1	2022-08-03	Wani Moses Yanga	Munuki PHCC	1	2020-09-07	30	Rock city					3	3	44216	20	2	Newly tested at ANC	1	1 visit	1	1	At Health Facility	1	Live Birth-LB	1	New on ART -- in pregnancy	2	2022-09-07	1c = TDF/3TC/DTG	3		2020-09-07	Pregnant	2021-03-05	179	3-5 months	2	180	180	0	NA	3	NA	3	2021-03-05	0	179
79	IMPORTA-0966	1	2022-08-03	Wani Moses Yanga	Munuki PHCC	1	2020-09-26	28	munuki bb	Single (never married)	1	Unemployed	1	3	3	44171	24	2	Known Pos on ART	2	3 visits	3	3	At Health Facility	1	Live Birth-LB	1	Already on ART	1	2022-02-15	1c = TDF/3TC/DTG	3		2020-09-25	Pregnant	2021-03-22	178	3-5 months	2	180	180	0	Yes	1	Suppressed	1	2021-03-23	1	179
80	IMPORTA-0967	1	2022-08-03	Wani Moses Yanga	Munuki PHCC	1	2020-10-20	24	lologo	Married Monogamous	2	Housewife	1	2	3	44250			Newly tested at ANC	1	3 visits	3	3	At Health Facility	1	Live Birth-LB	1	New on ART -- in pregnancy	2	2020-10-20	1c = TDF/3TC/DTG	3		2020-10-20	Pregnant	2021-04-20	182	6+ months	3	180	180	0	Yes	1	Suppressed	1	2021-03-03	-48	134
81	IMPORTA-0968	1	2022-08-03	Wani Moses Yanga	Munuki PHCC	1	2020-10-15	21	Hai lokulili	Widowed	3	Student	1	1	2	44240	20	2	Known Pos on ART	2				At Health Facility	1	Live Birth-LB	1	Already on ART	1	2016-01-20	1c = TDF/3TC/DTG	3		2020-10-15	Pregnant	2021-04-12	179	3-5 months	2	180	180	0	Yes	1	Suppressed	1	2021-04-12	0	179
82	IMPORTA-0969	1	2022-08-03	Wani Moses Yanga	Munuki PHCC	1	2020-10-14	19	Newsite	Single (never married)	1			1	1		38	2	Known Pos on ART	2	1 visit	1	1	At Health Facility	1	Live Birth-LB	1	Already on ART	1	2020-04-27	1c = TDF/3TC/DTG	3		2020-10-14	Pregnant	2021-04-14	182	6+ months	3	180	180	0	Yes	1	Suppressed	1	2021-04-23	9	191
83	IMPORTA-0970	1	2022-08-31	Wani Moses Yanga	Munuki PHCC	1	2020-10-23	23	gudele 2			Housewife	1	1	2	44255			Known Pos on ART	2	1 visit	1	1	At Health Facility	1	Live Birth-LB	1	Already on ART	1	2019-06-03	1c = TDF/3TC/DTG	3		2020-10-23	Pregnant	2021-08-03	284	6+ months	3	180	180	0	NA	3	NA	3	2021-03-02	-154	130
84	IMPORTA-0971	1	2022-08-31	Wani Moses Yanga	Munuki PHCC	1	2020-10-22	25	gudele	Married Monogamous	2	Housewife	1	3	3		13	1	Known Pos on ART	2	2 visits	2	2	At Health Facility	1	Live Birth-LB	1	Already on ART	1	2017-06-05	1c = TDF/3TC/DTG	3		2020-10-22	Pregnant	2021-04-15	175	3-5 months	2	180	180	0	NA	3	NA	3	2021-04-29	14	189
85	IMPORTA-0972	1	2022-08-31	Wani Moses Yanga	Munuki PHCC	1	2020-10-15	28	newsite	Married Monogamous	2			2	2	44114	36	2	Known Pos on ART	2				At Health Facility	1	Live Birth-LB	1	Already on ART	1	2016-06-14	1c = TDF/3TC/DTG	3		2020-10-15	Pregnant	2021-04-15	182	6+ months	3	180	180	0	NA	3	NA	3	2020-11-17	-149	33
86	IMPORTA-0973	1	2020-11-02	Wani Moses Yanga	Munuki PHCC	1	2020-11-02	20	newsite	Married Monogamous	2	Housewife	1	1	2	44299	12	1	Newly tested at ANC	1				At home	2	Live Birth-LB	1	New on ART -- in pregnancy	2	2020-11-02	1c = TDF/3TC/DTG	3		2020-11-02	Pregnant	2021-05-02	181	6+ months	3	180	180	0	Yes	1	Unsuppressed	2	2021-06-14	43	224
87	IMPORTA-0974	1	2022-08-31	Wani Moses Yanga	Munuki PHCC	1	2020-11-03	28	jokoki			Housewife	1	2	3		39	2	Known Pos on ART	2	1 visit	1	1	At Health Facility	1	Live Birth-LB	1	Already on ART	1	2019-03-12	1c = TDF/3TC/DTG	3		2020-11-03	Pregnant	2021-05-03	181	6+ months	3	180	180	0	Yes	1	Suppressed	1	2021-04-08	-25	156
88	IMPORTA-0975	1	2022-08-31	Wani Moses Yanga	Munuki PHCC	1	2020-11-06	28	gudele 2	Married Monogamous	2	Housewife	1	2	3	44160			Known Pos on ART	2	1 visit	1	1	At Health Facility	1	Live Birth-LB	1	Already on ART	1	2018-10-29	1c = TDF/3TC/DTG	3		2020-11-06	Pregnant	2020-04-30				180	180	0	Yes	1	Suppressed	1	2021-09-21	509	319
89	IMPORTA-0976	1	2022-08-31	Wani Moses Yanga	Munuki PHCC	1	2020-11-09	29	mauna	Married Monogamous	2	Housewife	1	3	3				Newly tested at ANC	1	1 visit	1	1	At Health Facility	1	Live Birth-LB	1	New on ART -- in pregnancy	2	2020-11-09	1c = TDF/3TC/DTG	3		2020-11-09	Pregnant	2021-02-09	92	3-5 months	2	90	90	0	NA	3	NA	3	2021-02-04	-5	87
90	IMPORTA-0977	1	2022-08-31	Wani Moses Yanga	Munuki PHCC	1	2020-11-09	21	mauna	Married Monogamous	2	Housewife	1	2	3	44270			Known Pos on ART	2	1 visit	1	1	At Health Facility	1	Live Birth-LB	1	Already on ART	1	2017-10-30	1c = TDF/3TC/DTG	3		2020-06-29	Pregnant	2020-12-29	183	6+ months	3	180	180	0	NA	3	NA	3	2021-01-13	15	198
91	IMPORTA-0978	1	2022-08-31	Wani Moses Yanga	Munuki PHCC	1	2020-11-11	29	munuki bb	Married Monogamous	2	Business (Man/Women)/trader	2	3	3		20	2	Newly tested at ANC	1	2 visits	2	2	At Health Facility	1	Live Birth-LB	1	New on ART -- in pregnancy	2	2020-11-11	1c = TDF/3TC/DTG	3		2020-11-11	Pregnant	2021-05-11	181	6+ months	3	180	180	0	Yes	1	Suppressed	1	2021-05-10	-1	180
92	IMPORTA-0979	1	2022-08-31	Wani Moses Yanga	Munuki PHCC	1	2020-11-27	21	munuki bb	Married Monogamous	2	Housewife	1	1	2		12	1	Known Pos on ART	2	1 visit	1	1	At Health Facility	1	Live Birth-LB	1	New on ART -- postpartum	2	2019-02-28	1c = TDF/3TC/DTG	3		2020-11-27	Pregnant	2021-05-27	181	6+ months	3	180	180	0	NA	3	NA	3	2021-05-27	0	181
93	IMPORTA-0980	1	2022-08-31	Wani Moses Yanga	Munuki PHCC	1	2020-12-14	30	jebel ladu	Married Monogamous	2	Housewife	1	1	2		12	1	Known Pos on ART	2	2 visits	2	2	At Health Facility	1	Still Birth-MSB or FSB	2	Already on ART	1	2018-05-11	1c = TDF/3TC/DTG	3		2020-12-14	Pregnant	2021-06-14	182	6+ months	3	180	180	0	NA	3	NA	3	2021-06-14	0	182
94	IMPORTA-0981	1	2022-08-31	Wani Moses Yanga	Munuki PHCC	1	2020-12-14	20	munuki bb	Married Monogamous	2			1	2		16	2	Newly tested at ANC	1				At home	2	Live Birth-LB	1	New on ART -- in pregnancy	2	2020-12-14	1c = TDF/3TC/DTG	3		2020-12-14	Pregnant	2021-03-12	88	<3 months	1	90	90	0	NA	3	NA	3	2021-03-10	-2	86
95	IMPORTA-0982	1	2022-08-31	Wani Moses Yanga	Munuki PHCC	1	2020-12-14	28	munuki 107	Married Monogamous	2	Housewife	1	3	3	44277	24	2	Newly tested at ANC	1	2 visits	2	2	At Health Facility	1	Live Birth-LB	1	New on ART -- in pregnancy	2	2020-12-14	1c = TDF/3TC/DTG	3		2020-12-14	Pregnant	2021-06-14	182	6+ months	3	180	180	0	Yes	1	Suppressed	1	2021-06-17	3	185
96	IMPORTA-0983	1	2022-08-31	Wani Moses Yanga	Munuki PHCC	1	2020-12-16	25	kabu	Married Monogamous	2	Housewife	1	3	3		12	1	Known Pos on ART	2	1 visit	1	1	At Health Facility	1	Live Birth-LB	1	Already on ART	1	2021-12-09	1c = TDF/3TC/DTG	3		2020-02-16	Breastfeeding	2021-06-07	477	6+ months	3	180	180	0					2021-06-07	0	477
97	IMPORTA-0984	1	2022-08-31	Wani Moses Yanga	Munuki PHCC	1	2020-12-23	25	munuki bb	Married Monogamous	2	Housewife	1	2	3	44290			Newly tested at ANC	1	2 visits	2	2	At Health Facility	1	Live Birth-LB	1	New on ART -- in pregnancy	2	2020-12-23	1c = TDF/3TC/DTG	3		2020-12-23	Pregnant	2021-06-15	174	3-5 months	2	180	180	0	Yes	1	Suppressed	1	2021-06-25	10	184
98	IMPORTA-0985	1		Wani Moses Yanga	Munuki PHCC	1	2021-01-08	35	newsite	Married Monogamous	2	Housewife	1	3	3	44363	16	2	Newly tested at ANC	1	3 visits	3	3	At Health Facility	1	Live Birth-LB	1	New on ART -- in pregnancy	2	2021-01-08	1c = TDF/3TC/DTG	3		2021-01-08	Pregnant	2021-07-05	178	3-5 months	2	180	180	0	NA	3	NA	3	2021-07-05	0	178
99	IMPORTA-0986	1	2022-08-31	Wani Moses Yanga	Munuki PHCC	1	2021-01-11	30	gudele	Married Monogamous	2	Housewife	1	1	2				Known Pos on ART	2	1 visit	1	1	At Health Facility	1	Live Birth-LB	1	Already on ART	1	2017-08-23	1c = TDF/3TC/DTG	3		2021-01-11	Pregnant	2021-07-08	178	3-5 months	2	180	180	0	NA	3	NA	3	2021-07-05	-3	175
100	IMPORTA-0987	1	2022-08-31	Wani Moses Yanga	Munuki PHCC	1	2021-01-12	28	Hai seminary	Married Monogamous	2	Housewife	1	3	3		28	2	Known Pos on ART	2	2 visits	2	2	At Health Facility	1	Live Birth-LB	1	Already on ART	1	2017-01-30	1c = TDF/3TC/DTG	3		2021-01-12	Pregnant	2021-07-13	182	6+ months	3	180	180	0	NA	3	NA	3	2021-07-13	0	182
101	IMPORTA-0988	1	2022-08-31	Wani Moses Yanga	Munuki PHCC	1	2021-01-12	30	gudele	Married Monogamous	2	Housewife	1	3	3	44336	20	2	Newly tested at ANC	1	1 visit	1	1	At Health Facility	1	Live Birth-LB	1	New on ART -- in pregnancy	2	2021-01-12	1c = TDF/3TC/DTG	3		2021-01-12	Pregnant	2021-07-12	181	6+ months	3	180	180	0	NA	3	NA	3	2021-07-13	1	182
102	IMPORTA-0989	1	2022-08-31	Wani Moses Yanga	Munuki PHCC	1	2021-01-25	20	munuki	Married Monogamous	2	Unemployed	1	1	2	44343	20	2	Newly tested at ANC	1	3 visits	3	3	At Health Facility	1	Live Birth-LB	1	New on ART -- in pregnancy	2	2021-01-25	1c = TDF/3TC/DTG	3		2021-01-25	Pregnant	2022-07-23	544	6+ months	3	180	180	0	Yes	1	Suppressed	1	2021-07-27	-361	183
103	IMPORTA-0990	1	2022-08-31	Wani Moses Yanga	Munuki PHCC	1	2021-01-25	25	munuki			All other professions	2	1	2	44399	13	1	Newly tested at ANC	1	2 visits	2	2	At Health Facility	1	Live Birth-LB	1	New on ART -- in pregnancy	2	2021-07-25	1c = TDF/3TC/DTG	3		2021-01-25	Pregnant	2021-07-23	179	3-5 months	2	180	180	0	NA	3	NA	3	2021-07-23	0	179
104	IMPORTA-0991	1	2022-08-31	Wani Moses Yanga	Munuki PHCC	1	2021-01-29	30	gida	Married Monogamous	2	Business (Man/Women)/trader	2	3	3				Known Pos on ART	2				At home	2	Live Birth-LB	1	Already on ART	1	2018-11-07	1c = TDF/3TC/DTG	3		2021-01-29	Pregnant	2021-07-27	179	3-5 months	2	180	180	0	NA	3	NA	3	2021-09-02	37	216
105	IMPORTA-0992	1	2022-08-31	Wani Moses Yanga	Munuki PHCC	1	2021-02-01	26	munuki b	Married Monogamous	2	Business (Man/Women)/trader	2	3	3	44371	12	1	Known Pos on ART	2	1 visit	1	1	At Health Facility	1	Live Birth-LB	1	Already on ART	1	2018-02-22	1c = TDF/3TC/DTG	3		2021-02-01	Pregnant	2021-06-18	137	3-5 months	2	180	180	0	NA	3	NA	3	2021-06-18	0	137
106	IMPORTA-0993	1	2022-08-31	Wani Moses Yanga	Munuki PHCC	1	2021-02-18	31	Gudele	Married Monogamous	2	Business (Man/Women)/trader	2	3	3	44295			Known Pos on ART	2				At home	2	Live Birth-LB	1	Already on ART	1	2011-08-20	1f = TDF/3TC/EFV	6		2021-02-18	Pregnant	2021-08-17	180	6+ months	3	180	180	0	NA	3	NA	3	2021-08-17	0	180
107	IMPORTA-0994	1	2022-08-31	Wani Moses Yanga	Munuki PHCC	1	2021-02-19	27	amora	Married Monogamous	2	Housewife	1	3	3	44291	35	2	Known Pos on ART	2	1 visit	1	1	At Health Facility	1	Live Birth-LB	1	New on ART -- in pregnancy	2	2018-07-17	1f = TDF/3TC/EFV	6		2021-02-19	Pregnant	2021-08-18	180	6+ months	3	180	180	0	NA	3	NA	3	2021-08-18	0	180
108	IMPORTA-0995	1	2022-08-31	Wani Moses Yanga	Munuki PHCC	1	2021-02-23	30	gudele 2	Married Monogamous	2	Housewife	1	3	3	44560	28	2	Known Pos on ART	2	1 visit	1	1	At Health Facility	1	Live Birth-LB	1	Already on ART	1	2015-11-07	1c = TDF/3TC/DTG	3		2021-02-23	Pregnant	2021-09-20	209	6+ months	3	180	180	0	NA	3	NA	3		44459
109	IMPORTA-0996	1	2022-08-31	Wani Moses Yanga	Munuki PHCC	1	2021-02-26	29	mauna	Widowed	3	Unemployed	1	3	3		16	2	Newly tested at ANC	1	4 or more visits	4	3	At Health Facility	1	Live Birth-LB	1	New on ART -- in pregnancy	2	2021-12-26	1c = TDF/3TC/DTG	3		2021-02-26	Pregnant	2021-08-24	179	3-5 months	2	180	180	0	NA	3	NA	3	2021-08-23	-1	178
110	IMPORTA-0997	1	2022-08-31	Wani Moses Yanga	Munuki PHCC	1	2021-03-15	22	newsite	Married Monogamous	2	Salaried Employee	2	3	3	44436	16	2	Newly tested at ANC	1	3 visits	3	3	At Health Facility	1	Live Birth-LB	1	New on ART -- in pregnancy	2	2021-03-15	1c = TDF/3TC/DTG	3		2021-02-27	Pregnant	2021-08-29	183	6+ months	3	180	180	0	NA	3	NA	3	2021-08-24	-5	178
111	IMPORTA-0998	1	2022-08-31	Wani Moses Yanga	Munuki PHCC	1	2021-03-24	30	gudele 1	Married Monogamous	2	Business (Man/Women)/trader	2	2	3	44413	20	2	Known Pos on ART	2	2 visits	2	2	At Health Facility	1	Live Birth-LB	1	Already on ART	1	2016-08-23	1c = TDF/3TC/DTG	3		2021-03-24	Pregnant	2022-05-04	406	6+ months	3	60	60	0	NA	3	NA	3	2021-05-04	-365	41
112	IMPORTA-0999	1	2022-08-31	Wani Moses Yanga	Munuki PHCC	1	2021-04-01	24	thonyping	Married Monogamous	2	Housewife	1	3	3	44409	20	2	Known Pos on ART	2	2 visits	2	2	At Health Facility	1	Live Birth-LB	1	Already on ART	1	2017-04-18	1c = TDF/3TC/DTG	3		2021-04-01	Pregnant	2021-10-01	183	6+ months	3	180	180	0	NA	3	NA	3	2021-10-01	0	183
113	IMPORTA-1000	1	2022-08-31	Wani Moses Yanga	Munuki PHCC	1	2021-04-06	26	Hai Tarawa	Married Monogamous	2	Housewife	1	1	2	44442	20	2	Newly tested at ANC	1	2 visits	2	2	At Health Facility	1	Live Birth-LB	1	New on ART -- in pregnancy	2	2021-04-06	1c = TDF/3TC/DTG	3		2021-04-06	Pregnant	2021-10-04	181	6+ months	3	180	180	0	NA	3	NA	3	2021-10-04	0	181
114	IMPORTA-1001	1	2022-08-31	Wani Moses Yanga	Munuki PHCC	1	2021-04-09	27	Hai referendum	Married Monogamous	2	Housewife	1	2	3	44371	28	2	Newly tested at ANC	1	1 visit	1	1	At Health Facility	1	Still Birth-MSB or FSB	2	New on ART -- in pregnancy	2	2021-04-09	1c = TDF/3TC/DTG	3		2021-04-09	Pregnant	2021-10-07	181	6+ months	3	180	180	0	NA	3	NA	3	2021-10-07	0	181
115	IMPORTA-1002	1	2022-08-31	Wani Moses Yanga	Munuki PHCC	1	2021-04-13	24	munuki	Married Monogamous	2	Housewife	1	1	2	44412	24	2	Newly tested at ANC	1	1 visit	1	1	At Health Facility	1	Live Birth-LB	1	New on ART -- in pregnancy	2	2021-04-13	1c = TDF/3TC/DTG	3		2021-04-13	Pregnant	2021-10-12	182	6+ months	3	180	180	0	NA	3	NA	3	2021-10-12	0	182
116	IMPORTA-1003	1	2022-08-31	Wani Moses Yanga	Munuki PHCC	1	2021-05-05	28	mangten	Married Polygamous	2	Business (Man/Women)/trader	2	3	3	44349			Newly tested at ANC	1				At Health Facility	1	Live Birth-LB	1	New on ART -- in pregnancy	2	2021-05-05	1c = TDF/3TC/DTG	3		2021-05-05	Pregnant	2021-11-04	183	6+ months	3	180	180	0					2022-02-12	100	283
118	IMPORTA-1005	1	2022-08-31	Wani Moses Yanga	Munuki PHCC	1	2021-05-31	30	newsite	Married Monogamous	2	Housewife	1	3	3	44778	12	1	Known Pos on ART	2	1 visit	1	1	At Health Facility	1	Live Birth-LB	1	Already on ART	1	2020-02-20	1c = TDF/3TC/DTG	3		2021-05-31	Pregnant	2021-11-30	183	6+ months	3	180	180	0	NA	3	NA	3	2021-11-20	-10	173
119	IMPORTA-1006	1	2022-08-31	Wani Moses Yanga	Munuki PHCC	1	2021-05-31	24	munuki	Married Monogamous	2	Housewife	1	2	3	44846	16	2	Known Pos on ART	2	1 visit	1	1	At Health Facility	1	Live Birth-LB	1	Already on ART	1	2018-06-26	1c = TDF/3TC/DTG	3		2021-05-31	Pregnant	2021-11-30	183	6+ months	3	180	180	0	NA	3	NA	3	2022-01-09	40	223
120	IMPORTA-1007	1	2022-08-31	Wani Moses Yanga	Munuki PHCC	1	2021-06-18	22	thonyping	Married Monogamous	2	Housewife	1	2	3	44543	12	1	Newly tested at ANC	1	1 visit	1	1	At Health Facility	1	Live Birth-LB	1	New on ART -- in pregnancy	2	2021-06-18	1c = TDF/3TC/DTG	3		2021-08-18	Pregnant	2021-12-16	120	3-5 months	2	180	180	0	NA	3	NA	3	2021-12-16	0	120
121	IMPORTA-1008	1	2022-08-31	Wani Moses Yanga	Munuki PHCC	1	2021-06-21	27	thongping	Married Polygamous	2	Housewife	1	3	3	44471	24	2	Newly tested at ANC	1	1 visit	1	1	At home	2	Live Birth-LB	1	New on ART -- in pregnancy	2	2021-06-21	1c = TDF/3TC/DTG	3		2021-06-21	Pregnant	2021-08-16	56	<3 months	1	180	180	0	NA	3	NA	3	2021-12-16	122	178
122	IMPORTA-1009	1		Wani Moses Yanga	Munuki PHCC	1	2021-06-28	22	mangaten	Married Monogamous	2	Business (Man/Women)/trader	2	1	2	44539	12	1	Newly tested at ANC	1	1 visit	1	1	At home	2	Live Birth-LB	1	New on ART -- in pregnancy	2	2021-06-28	1c = TDF/3TC/DTG	3		2021-06-28	Pregnant	2021-12-28	183	6+ months	3	180	180	0	Yes	1	Suppressed	1	2021-06-28	-183	0
123	IMPORTA-1010	1		Wani Moses Yanga	Munuki PHCC	1	2021-07-12	28	Gudele	Married Monogamous	2	All other professions	2	3	3	44557	16	2	Known Pos on ART	2	2 visits	2	2	At Health Facility	1	Live Birth-LB	1	Already on ART	1	2021-01-15	1c = TDF/3TC/DTG	3		2021-06-12	Pregnant	2022-01-20	222	6+ months	3	180	180	0	NA	3	NA	3	2022-02-20	31	253
124	IMPORTA-1011	1	2022-08-31	Wani Moses Yanga	Munuki PHCC	1	2022-07-26	24		Married Monogamous	2	Housewife	1	2	3		12	1	Newly tested at ANC	1	1 visit	1	1	At Health Facility	1	Live Birth-LB	1	New on ART -- in pregnancy	2	2021-07-26	1c = TDF/3TC/DTG	3		2021-06-26	Breastfeeding	2022-01-25	213	6+ months	3	180	180	0	NA	3	NA	3	2022-01-25	0	213
125	IMPORTA-1012	1	2022-08-31	Wani Moses Yanga	Munuki PHCC	1	2021-07-26	28		Married Monogamous	2	Housewife	1	3	3	44583	12	1	Newly tested at ANC	1	1 visit	1	1	At Health Facility	1	Live Birth-LB	1	New on ART -- in pregnancy	2	2021-07-26	1c = TDF/3TC/DTG	3		2021-07-26	Pregnant	2022-01-25	183	6+ months	3	180	180	0	NA	3	NA	3	2022-03-26	60	243
126	IMPORTA-1013	1	2022-08-31	Wani Moses Yanga	Munuki PHCC	1	2021-07-19	27	munuki b	Married Polygamous	2	Housewife	1	3	3	44564	16	2	Newly tested at ANC	1				At Health Facility	1	Live Birth-LB	1	New on ART -- in pregnancy	2	2021-07-19	1c = TDF/3TC/DTG	3		2021-07-19	Pregnant	2022-01-15	180	6+ months	3	180	180	0	NA	3	NA	3	2022-01-15	0	180
127	IMPORTA-1014	1	2022-08-31	Wani Moses Yanga	Munuki PHCC	1	2021-08-03	22	jebel suk	Married Monogamous	2	Business (Man/Women)/trader	2	3	3		38	2	Known Pos on ART	2				At home	2	Live Birth-LB	1	Already on ART	1	2021-08-03	1c = TDF/3TC/DTG	3		2021-08-03	Breastfeeding	2022-02-03	184	6+ months	3	180	180	0	NA	3	NA	3	2022-02-03	0	184
128	IMPORTA-1015	1	2022-08-31	Wani Moses Yanga	Munuki PHCC	1	2021-08-06	28	munuki 107	Married Monogamous	2	Housewife	1	3	3	44614	10	1	Newly tested at ANC	1				At Health Facility	1	Live Birth-LB	1	New on ART -- in pregnancy	2	2021-08-06	1c = TDF/3TC/DTG	3		2021-08-06	Pregnant	2022-02-03	181	6+ months	3	180	180	0	NA	3	NA	3	2022-02-03	0	181
129	IMPORTA-1016	1	2022-08-31	Wani Moses Yanga	Munuki PHCC	1	2021-08-10	28	hai kuwait	Married Polygamous	2	Business (Man/Women)/trader	2	1	2	44446	24	2	Newly tested at ANC	1	1 visit	1	1	At Health Facility	1	Live Birth-LB	1	New on ART -- in pregnancy	2	2021-08-10	1c = TDF/3TC/DTG	3		2021-08-10	Pregnant	2022-02-08	182	6+ months	3	180	180	0	NA	3	NA	3	2022-02-08	0	182
130	IMPORTA-1017	1	2022-08-31	Wani Moses Yanga	Munuki PHCC	1	2021-08-10	30	thongping	Married Monogamous	2	Housewife	1	3	3		8	1	Known Pos on ART	2	2 visits	2	2	At Health Facility	1	Live Birth-LB	1	Already on ART	1	2019-02-18	1c = TDF/3TC/DTG	3		2021-08-10	Pregnant	2021-12-22	134	3-5 months	2	180	180	0	Yes	1	Unsuppressed	2	2021-12-22	0	134
131	IMPORTA-1018	1	2022-08-31	Wani Moses Yanga	Munuki PHCC	1	2021-08-27	26	newsite	Married Monogamous	2	Housewife	1	3	3	44603	12	1	Newly tested at ANC	1	3 visits	3	3	At Health Facility	1	Live Birth-LB	1	New on ART -- in pregnancy	2	2021-08-27	1c = TDF/3TC/DTG	3		2021-08-27	Breastfeeding	2022-02-24	181	6+ months	3	180	180	0	NA	3	NA	3	2022-02-24	0	181
132	IMPORTA-1019	1	2022-08-31	Wani Moses Yanga	Munuki PHCC	1	2021-09-03	23	thongping	Married Polygamous	2	Housewife	1	3	3	44642	10	1	Newly tested at ANC	1				At Health Facility	1	Live Birth-LB	1	New on ART -- in pregnancy	2	2011-09-03	1c = TDF/3TC/DTG	3		2021-09-03	Pregnant	2022-03-03	181	6+ months	3	180	180	0	NA	3	NA	3	2022-03-03	0	181
133	IMPORTA-1020	1	2022-08-31	Wani Moses Yanga	Munuki PHCC	1	2021-09-13	20	hai tarawa	Married Polygamous	2	Housewife	1	2	1	44690	5	1	Known Pos on ART	2				At Health Facility	1	Live Birth-LB	1	Already on ART	1	2020-03-12	1c = TDF/3TC/DTG	3		2021-09-13	Pregnant	2022-05-24	253	6+ months	3	180	180	0	NA	3	NA	3	2022-03-24	-61	192
134	IMPORTA-1021	1	2022-08-31	Wani Moses Yanga	Munuki PHCC	1	2021-09-14	31	kor William	Married Monogamous	2	Housewife	1	3	3		12	1	Known Pos on ART	2	1 visit	1	1	At home	2	Live Birth-LB	1	Already on ART	1	2019-07-02	1c = TDF/3TC/DTG	3		2021-09-14	Breastfeeding	2022-04-12	210	6+ months	3	180	180	0	NA	3	NA	3	2022-04-12	0	210
135	IMPORTA-1022	1	2022-08-31	Wani Moses Yanga	Munuki PHCC	1	2021-09-16	29	newsite	Married Monogamous	2	Business (Man/Women)/trader	2	2	3				Known Pos on ART	2	1 visit	1	1	At home	2	Live Birth-LB	1	Already on ART	1	2018-03-28	1f = TDF/3TC/EFV	6		2021-09-16	Pregnant	2022-03-15	180	6+ months	3	180	180	0	NA	3	NA	3	2022-05-23	69	249
136	IMPORTA-1023	1	2022-08-31	Wani Moses Yanga	Munuki PHCC	1	2021-10-04	25	thongping	Married Monogamous	2	Housewife	1	2	3	44633	12	1	Newly tested at ANC	1	2 visits	2	2	At Health Facility	1	Live Birth-LB	1	New on ART -- in pregnancy	2	2021-10-04	1c = TDF/3TC/DTG	3		2021-10-04	Pregnant	2022-04-04	182	6+ months	3	180	180	0	NA	3	NA	3	2022-05-19	45	227
137	IMPORTA-1024	1	2022-08-31	Wani Moses Yanga	Munuki PHCC	1	2021-10-08	22	gudele 2	Married Monogamous	2	Housewife	1	2	3	44676	11	1	Newly tested at ANC	1	2 visits	2	2	At Health Facility	1	Live Birth-LB	1	New on ART -- in pregnancy	2	2021-10-08	1c = TDF/3TC/DTG	3		2021-09-08	Pregnant	2022-04-07	211	6+ months	3	180	180	0	NA	3	NA	3	2022-06-02	56	267
138	IMPORTA-1025	1	2022-09-11	Wani Moses Yanga	Munuki PHCC	1	2022-10-11	34		Married Polygamous	2	Business (Man/Women)/trader	2	3	3	44602	18	2	Known Pos on ART	2	2 visits	2	2	At Health Facility	1	Live Birth-LB	1	Already on ART	1	2018-05-12	1c = TDF/3TC/DTG	3		2021-10-11	Pregnant	2022-04-26	197	6+ months	3	180	180	0	NA	3	NA	3	2022-04-26	0	197
139	IMPORTA-1026	1	2022-08-31	Wani Moses Yanga	Munuki PHCC	1	2021-10-11	31	gudele 1	Married Monogamous	2	Business (Man/Women)/trader	2	3	3		20	2	Newly tested at ANC	1	3 visits	3	3	At Health Facility	1	Live Birth-LB	1	New on ART -- in pregnancy	2		1c = TDF/3TC/DTG	3		2021-10-11	Pregnant	2022-04-11	182	6+ months	3	180	180	0	NA	3	NA	3	2022-04-11	0	182
140	IMPORTA-1027	1	2022-08-31	Wani Moses Yanga	Munuki PHCC	1	2022-10-15	41	gudele	Married Monogamous	2	Housewife	1	3	3	44569			Known Pos on ART	2	2 visits	2	2	At Health Facility	1	Live Birth-LB	1	Already on ART	1	2018-09-29	1e = AZT/3TC+DTG	5		2021-10-15	Pregnant	2022-04-13	180	6+ months	3	180	180	0	NA	3	NA	3	2022-04-13	0	180
141	IMPORTA-1028	1	2022-08-31	Wani Moses Yanga	Munuki PHCC	1	2021-10-18	37		Married Monogamous	2	Housewife	1	3	3	44647	16	2	Known Pos on ART	2	3 visits	3	3	At home	2	Still Birth-MSB or FSB	2	Already on ART	1		1c = TDF/3TC/DTG	3		2021-10-18	Pregnant	2022-03-11	144	3-5 months	2	180	180	0	NA	3	NA	3	2022-03-11	0	144
142	IMPORTA-1029	1	2022-08-31	Wani Moses Yanga	Munuki PHCC	1	2021-10-22	33	gudele	Married Monogamous	2	Housewife	1	3	3	44622			Newly tested at ANC	1	2 visits	2	2	At home	2	Live Birth-LB	1	New on ART -- in pregnancy	2	2021-10-22	1c = TDF/3TC/DTG	3		2021-10-22	Pregnant	2022-04-22	182	6+ months	3	180	180	0	NA	3	NA	3	2022-04-22	0	182
143	IMPORTA-1030	1		Wani Moses Yanga	Munuki PHCC	1	2021-11-05	30	munuki b	Married Monogamous	2	Housewife	1	3	3	44614	24	2	Known Pos on ART	2	3 visits	3	3	At Health Facility	1	Live Birth-LB	1	Already on ART	1	2018-05-03	1f = TDF/3TC/EFV	6		2021-11-05	Pregnant	2022-05-09	185	6+ months	3	180	180	0	NA	3	NA	3	2022-05-09	0	185
144	IMPORTA-1031	1	2022-08-31	Wani Moses Yanga	Munuki PHCC	1	2021-11-15	39	thongping	Married Monogamous	2	Business (Man/Women)/trader	2	3	3	44093	32	2	Known Pos on ART	2				At Health Facility	1	Live Birth-LB	1	Already on ART	1	2021-11-10	1c = TDF/3TC/DTG	3		2021-11-05	Breastfeeding	2022-05-10	186	6+ months	3	180	180	0	NA	3	NA	3	2022-05-10	0	186
145	IMPORTA-1032	1	2022-09-01	Wani Moses Yanga	Munuki PHCC	1	2021-11-25	32	gumbo shirikat	Married Monogamous	2	Housewife	1	3	3		36	2	Known Pos on ART	2	1 visit	1	1	At Health Facility	1	Live Birth-LB	1	Already on ART	1	2016-08-28	1c = TDF/3TC/DTG	3		2021-11-25	Pregnant	2022-03-29	124	3-5 months	2	180	180	0	NA	3	NA	3	2022-03-29	0	124
146	IMPORTA-1033	1	2022-09-03	Wani Moses Yanga	Munuki PHCC	1	2021-11-25	23	rockcity	Married Monogamous	2	Housewife	1	1	2	44600	24	2	Newly tested at ANC	1	2 visits	2	2	At Health Facility	1	Live Birth-LB	1	New on ART -- in pregnancy	2	2021-11-25	1c = TDF/3TC/DTG	3		2021-11-25	Pregnant	2022-05-25	181	6+ months	3	180	180	0	Yes	1	Suppressed	1	2022-06-03	9	190
147	IMPORTA-1034	1	2022-09-01	Wani Moses Yanga	Munuki PHCC	1	2022-11-25	21	munuki	Married Monogamous	2	Housewife	1	1	2	44241			Known Pos on ART	2				At home	2	Live Birth-LB	1	Already on ART	1	2021-11-13	1c = TDF/3TC/DTG	3		2021-11-25	Breastfeeding	2022-05-13	169	3-5 months	2	180	180	0	NA	3	NA	3	2022-05-13	0	169
148	IMPORTA-1035	1	2022-09-01	Wani Moses Yanga	Munuki PHCC	1	2021-11-29	29	custom	Married Monogamous	2	Business (Man/Women)/trader	2	3	3	44678			Known Pos on ART	2	3 visits	3	3	At Health Facility	1	Live Birth-LB	1	Already on ART	1	2019-02-25	1c = TDF/3TC/DTG	3		2021-11-29	Pregnant	2022-05-30	182	6+ months	3	180	180	0	No	2	NA	3		44711
149	IMPORTA-1036	1	2022-09-01	Wani Moses Yanga	Munuki PHCC	1	2021-12-02	29	gudele 2	Married Monogamous	2	Housewife	1	3	3		24	2	Known Pos on ART	2	2 visits	2	2	At Health Facility	1	Live Birth-LB	1	Already on ART	1	2018-09-03	1c = TDF/3TC/DTG	3		2021-12-02	Pregnant	2022-06-02	182	6+ months	3	180	180	0	NA	3	NA	3	2022-06-02	0	182
150	IMPORTA-1037	1	2022-09-01	Wani Moses Yanga	Munuki PHCC	1	2021-12-06	24	newsite	Married Monogamous	2	Housewife	1	2	3	44689	24	2	Known Pos on ART	2	2 visits	2	2	At Health Facility	1	Live Birth-LB	1	Already on ART	1	2020-01-22	1c = TDF/3TC/DTG	3		2021-12-06	Pregnant	2022-04-01	116	3-5 months	2	180	180	0	NA	3	NA	3	2022-04-01	0	116
151	IMPORTA-1038	1	2022-09-01	Wani Moses Yanga	Munuki PHCC	1	2021-12-15	22	gudele 2	Married Monogamous	2	Farming	2	6	6	44607	12	1	Newly tested at ANC	1	1 visit	1	1	At Health Facility	1	Live Birth-LB	1	New on ART -- in pregnancy	2	2021-12-15	1c = TDF/3TC/DTG	3		2021-12-15	Breastfeeding	2022-06-13	180	6+ months	3	180	180	0	NA	3	NA	3	2022-06-13	0	180
152	IMPORTA-1039	1	2022-09-01	Wani Moses Yanga	Munuki PHCC	1	2021-12-20	24	newsite	Married Monogamous	2	Housewife	1	2	3	44548	40	2	Known Pos on ART	2	1 visit	1	1	At Health Facility	1	Live Birth-LB	1	Already on ART	1	2017-03-17	1c = TDF/3TC/DTG	3		2021-12-20	Breastfeeding	2022-03-05	75	<3 months	1	90	90	0	NA	3	NA	3	2022-03-05	0	75
153	IMPORTA-1040	1	2022-09-01	Wani Moses Yanga	Munuki PHCC	1	2022-12-21	30	gumbo shirikat	Married Polygamous	2	Housewife	1	3	3	44594	28	2	Newly tested at ANC	1	2 visits	2	2	At Health Facility	1	Live Birth-LB	1	New on ART -- in pregnancy	2	2021-12-21	1c = TDF/3TC/DTG	3		2021-12-21	Pregnant	2022-06-19	180	6+ months	3	180	180	0	NA	3	NA	3	2022-06-19	0	180
154	IMPORTA-1041	1	2022-09-01	Wani Moses Yanga	Munuki PHCC	1	2021-12-29	30	newsite	Married Monogamous	2	Housewife	1	3	3	44642	24	2	Known Pos on ART	2	2 visits	2	2	At home	2	Live Birth-LB	1	Already on ART	1	2020-01-03	1c = TDF/3TC/DTG	3		2021-12-29	Pregnant	2022-03-29	90	3-5 months	2	90	90	0	NA	3	NA	3	2022-03-29	0	90
155	IMPORTA-1042	1	2022-09-01	Wani Moses Yanga	Munuki PHCC	1	2022-01-07	24	mangaten	Married Monogamous	2	Housewife	1	2	2		8	1	Newly tested at ANC	1	1 visit	1	1	At home	2	Live Birth-LB	1	New on ART -- in pregnancy	2	2022-01-07	1c = TDF/3TC/DTG	3		2022-01-07	Breastfeeding	2022-07-05	179	3-5 months	2	180	180	0	NA	3	NA	3	2022-07-05	0	179
156	IMPORTA-1043	1	2022-09-01	Wani Moses Yanga	Munuki PHCC	1	2022-01-14	23		Married Monogamous	2	Housewife	1	1	2	44691	20	2	Known Pos on ART	2	2 visits	2	2	At Health Facility	1	Live Birth-LB	1	Already on ART	1	2021-09-03	1c = TDF/3TC/DTG	3		2022-01-14	Pregnant	2022-04-04	80	<3 months	1	180	180	0	NA	3	NA	3	2022-04-04	0	80
157	IMPORTA-1044	1	2022-09-01	Wani Moses Yanga	Munuki PHCC	1	2022-01-14	29	Mauna	Married Monogamous	2	Housewife	1	3	4	44841	20	2	Known Pos on ART	2	2 visits	2	2	At Health Facility	1	Live Birth-LB	1	Already on ART	1	2020-11-09	1c = TDF/3TC/DTG	3		2022-01-14	Pregnant	2022-07-03	170	3-5 months	2	180	180	0	NA	3	NA	3	2022-07-03	0	170
158	IMPORTA-1045	1	2022-09-01	Wani Moses Yanga	Munuki PHCC	1	2022-01-21	29	thongping	Married Monogamous	2	Housewife	1	2	3				Newly tested at ANC	1	3 visits	3	3	At Health Facility	1	Live Birth-LB	1	New on ART -- in pregnancy	2	2022-01-21	1c = TDF/3TC/DTG	3		2022-01-21	Pregnant	2022-07-21	181	6+ months	3	180	180	0	NA	3	NA	3	2022-07-21	0	181
159	IMPORTA-1046	1	2022-09-01	Wani Moses Yanga	Munuki PHCC	1	2022-01-29	24	gudele	Married Monogamous	2	Housewife	1	2	3	44752			Newly tested at ANC	1	3 visits	3	3	At Health Facility	1	Live Birth-LB	1	New on ART -- in pregnancy	2		1c = TDF/3TC/DTG	3		2022-01-29	Pregnant	2022-07-27	179	3-5 months	2	180	180	0	NA	3	NA	3	2022-07-27	0	179
163	IMPORTA-1050	1	2022-09-01	Wani Moses Yanga	Munuki PHCC	1	2022-02-22	31	munuki	Married Monogamous	2	Housewife	1	3	3		35	2	Known Pos on ART	2	1 visit	1	1	At Health Facility	1	Live Birth-LB	1	Already on ART	1	2017-06-12	1c = TDF/3TC/DTG	3		2022-02-22	Pregnant	2022-07-18	146	3-5 months	2	180	180	0	NA	3	NA	3	2022-07-18	0	146
28	IMPORTA-1053	1	2022-08-31	Arach Maker Arach	Rumbek Hospital	2	2022-06-29	30	Abiriu	Single (never married)	1	Housewife	1	3			28	2	Newly tested at ANC	1	2 visits	2	2	At home	2	Live Birth-LB	1	New on ART -- in pregnancy	2	2020-06-29	1c = TDF/3TC/DTG	3		2020-06-29	Pregnant	2020-12-29	183	6+ months	3	180	180	0	No	2	NA	3	2021-12-29	365	548
29	IMPORTA-1054	1	2022-08-31	Arach Maker Arach	Rumbek Hospital	2	2020-06-11	34	makuriric	Single (never married)	1	Housewife	1		9		18	2	Known Pos on ART	2	1 visit	1	1	At Health Facility	1	Live Birth-LB	1	Already on ART	1		1f = TDF/3TC/EFV	6		2020-06-11	Pregnant	2020-12-11	183	6+ months	3	180	274	-94					2021-03-15	94	277
30	IMPORTA-1055	1	2022-08-31	Arach Maker Arach	Rumbek Hospital	2	2020-06-10	21	mammal bab	Single (never married)	1	Housewife	1	3	4		18	2	Known Pos on ART	2	1 visit	1	1	At Health Facility	1	Live Birth-LB	1	Already on ART	1		1c = TDF/3TC/DTG	3		2020-06-10	Breastfeeding	2020-12-10	183	6+ months	3	180	147	33	Yes	1	Suppressed	1	2020-09-03	-98	85
31	IMPORTA-1056	1	2022-08-05	Arach Maker Arach	Rumbek Hospital	2	2022-05-05	34	akuach	Single (never married)	1	Housewife	1	4		44048	8	1	Known Pos on ART	2	1 visit	1	1	At Health Facility	1					2017-07-03	1c = TDF/3TC/DTG	3		2020-05-05	Pregnant	2020-08-05	92	3-5 months	2	90	90	0	Yes	1	Suppressed	1	2020-08-05	0	92
33	IMPORTA-1058	1	2022-08-31	Arach Maker Arach	Rumbek Hospital	2	2020-04-17	32	malakia	Married Monogamous	2			4					Known Pos on ART	2	2 visits	2	2	At Health Facility	1	Live Birth-LB	1			2020-04-06	1c = TDF/3TC/DTG	3		2020-04-17	Pregnant	2020-10-17	183	6+ months	3	180	155	25	Yes	1	Suppressed	1	2020-09-22	-25	158
34	IMPORTA-1059	1	2022-08-31	Arach Maker Arach	Rumbek Hospital	2	2020-03-19	30	manual bab	Single (never married)	1	Housewife	1	4	4		38	2	Known Pos on ART	2	1 visit	1	1	At home	2	Live Birth-LB	1	Already on ART	1		1c = TDF/3TC/DTG	3		2020-03-19	Breastfeeding	2020-09-19	184	6+ months	3	180	216	-36	Yes	1	Unsuppressed	2	2020-11-06	48	232
35	IMPORTA-1060	1	2022-08-31	Arach Maker Arach	Rumbek Hospital	2	2020-03-23	19	makuriric	Single (never married)	1	Housewife	1	3	1		25	2	Newly tested at ANC	1	2 visits	2	2	At home	2			New on ART -- in pregnancy	2	2020-03-23	1c = TDF/3TC/DTG	3		2020-03-23	Pregnant	2020-09-23	184	6+ months	3	180	180	0	No	2	NA	3	2020-09-28	5	189
36	IMPORTA-1061	1	2022-08-31	Arach Maker Arach	Rumbek Hospital	2	2020-03-19	30	mabor duang	Divorced/separated	3	Housewife	1	5			25	2	Known Pos on ART	2	2 visits	2	2	At Health Facility	1	Live Birth-LB	1	Already on ART	1	2018-09-20	1f = TDF/3TC/EFV	6		2020-03-19	Breastfeeding	2020-09-19	184	6+ months	3	180	180	0	Yes	1	Suppressed	1	2020-09-19	0	184
37	IMPORTA-1062	1	2022-08-31	Arach Maker Arach	Rumbek Hospital	2	2020-03-19	35	Akuac	Married Polygamous	2			6	4		11	1	Known Pos on ART	2				At home	2	Live Birth-LB	1	Already on ART	1		1c = TDF/3TC/DTG	3		2020-03-19	Breastfeeding	2020-05-19	61	<3 months	1	90	110	-20	No	2	NA	3	2022-08-04	807	868
38	IMPORTA-1063	1	2022-08-31	Arach Maker Arach	Rumbek Hospital	2	2020-03-12	25	maborngap	Married Monogamous	2	Housewife	1	5	2		12	1	Known Pos on ART	2	2 visits	2	2	At Health Facility	1	Live Birth-LB	1	Already on ART	1	2019-09-11	1c = TDF/3TC/DTG	3		2020-03-12	Breastfeeding	2020-09-12	184	6+ months	3	180	180	0	Yes	1	Suppressed	1	2020-09-12	0	184
39	IMPORTA-1064	1		Arach Maker Arach	Rumbek Hospital	2	2020-02-27	19	malual bab	Divorced/separated	3	Housewife	1	3			13	1	Newly tested at ANC	1				At home	2	Live Birth-LB	1	Already on ART	1	2019-02-06	1c = TDF/3TC/DTG	3		2020-02-27	Pregnant	2020-08-27	182	6+ months	3	180	180	0	Yes	1	Suppressed	1	2020-08-27	0	182
40	IMPORTA-1065	1	2022-08-31	Arach Maker Arach	Rumbek Hospital	2	2020-02-18	27	ayen mayar	Single (never married)	1	Housewife	1	2	3		32	2	Known Pos not on ART	2				At Health Facility	1	Live Birth-LB	1	New on ART -- postpartum	2	2020-02-18	1c = TDF/3TC/DTG	3		2020-02-18	Breastfeeding	2020-05-18	90	3-5 months	2	90	90	0	Yes	1	Unsuppressed	2	2020-05-18	0	90
41	IMPORTA-1066	1	2022-08-31	Arach Maker Arach	Rumbek Hospital	2	2020-02-18	33	maborngap	Married Polygamous	2	Housewife	1		3				Known Pos on ART	2	2 visits	2	2	At Health Facility	1	Live Birth-LB	1	Already on ART	1	2018-05-29	1f = TDF/3TC/EFV	6		2020-02-18	Pregnant	2020-05-18	90	3-5 months	2	90	90	0	Yes	1	Suppressed	1	2020-05-18	0	90
42	IMPORTA-1067	1	2022-08-31	Arach Maker Arach	Rumbek Hospital	2	2020-02-11	35	malual bab	Single (never married)	1	Housewife	1	4	3		15	1	Known Pos not on ART	2				At Health Facility	1	Live Birth-LB	1	New on ART -- postpartum	2	2020-02-11	1c = TDF/3TC/DTG	3		2020-02-11	Breastfeeding	2020-05-11	90	3-5 months	2	90	90	0	No	2	NA	3	2020-05-11	0	90
43	IMPORTA-1068	1	2022-08-31	Arach Maker Arach	Rumbek Hospital	2	2020-02-05	27	deng bhaial	Single (never married)	1	Housewife	1				12	1	Newly tested at ANC	1	2 visits	2	2			Live Birth-LB	1	New on ART -- postpartum	2	2020-02-05	1c = TDF/3TC/DTG	3		2020-02-05	Breastfeeding	2020-05-05	90	3-5 months	2	90	90	0	No	2	NA	3	2020-05-05	0	90
44	IMPORTA-1069	1	2022-08-31	Arach Maker Arach	Rumbek Hospital	2	2020-02-05	19	malual kodi	Single (never married)	1	Housewife	1	4	4				Known Pos on ART	2	2 visits	2	2	At Health Facility	1	Live Birth-LB	1	Already on ART	1	2019-05-27	1f = TDF/3TC/EFV	6		2020-02-05	Breastfeeding	2020-05-05	90	3-5 months	2	90	90	0	Yes	1	Unsuppressed	2	2020-05-05	0	90
45	IMPORTA-1070	1	2022-08-31	Arach Maker Arach	Rumbek Hospital	2	2020-01-21	23	riak dor	Married Monogamous	2	Housewife	1	4	2		13	1	Known Pos on ART	2	2 visits	2	2	At Health Facility	1	Live Birth-LB	1	Already on ART	1		1f = TDF/3TC/EFV	6		2020-01-21	Pregnant	2020-07-22	183	6+ months	3	180	330	-150	No	2	NA	3	2022-09-09	870	1053
46	IMPORTA-1071	1	2022-08-31	Arach Maker Arach	Rumbek Hospital	2	2020-01-23	25	cuei cok	Married Monogamous	2	Housewife	1	4			13	1	Known Pos on ART	2	2 visits	2	2	At Health Facility	1	Live Birth-LB	1	Already on ART	1		1c = TDF/3TC/DTG	3		2020-01-23	Pregnant	2020-04-23	91	3-5 months	2	90	90	0	Yes	1	Suppressed	1	2020-04-23	0	91
47	IMPORTA-1072	1		Arach Maker Arach	Rumbek Hospital	2	2020-06-10	39	malengot	Single (never married)	1				3		14	1	Known Pos on ART	2	3 visits	3	3	At home	2			Already on ART	1		1f = TDF/3TC/EFV	6		2020-06-10	Pregnant	2020-12-10	183	6+ months	3	180	180	0	Yes	1	Unsuppressed	2	2020-12-10	0	183
48	IMPORTA-1073	1	2022-08-31	Arach Maker Arach	Rumbek Hospital	2	2020-05-04	26	billing cok	Married Monogamous	2	Housewife	1	6	1				Known Pos on ART	2	2 visits	2	2	At Health Facility	1			Already on ART	1	2019-08-08	1f = TDF/3TC/EFV	6		2020-05-04	Pregnant	2020-11-04	184	6+ months	3	180	180	0	Yes	1	Unsuppressed	2	2022-05-04	546	730
49	IMPORTA-1074	1	2022-08-31	Arach Maker Arach	Rumbek Hospital	2	2020-01-13	29	paloc	Married Polygamous	2	Housewife	1	4		43863	8	1	Newly tested at ANC	1	2 visits	2	2	At Health Facility	1	Live Birth-LB	1	New on ART -- in pregnancy	2		1c = TDF/3TC/DTG	3		2020-01-13	Pregnant	2020-07-13	182	6+ months	3	90	110	-20	Yes	1	Suppressed	1	2020-05-26	-48	134
50	IMPORTA-1075	1		Arach Maker Arach	Rumbek Hospital	2	2020-01-07	19	akuac	Single (never married)	1	Housewife	1	3	5		20	2	Known Pos on ART	2	1 visit	1	1	At Health Facility	1	Live Birth-LB	1				1c = TDF/3TC/DTG	3		2020-01-07	Pregnant	2022-04-07	821	6+ months	3	90	180	-90	No	2	NA	3	2020-07-13	-633	188
51	IMPORTA-1076	1	2022-08-31	Arach Maker Arach	Rumbek Hospital	2	2019-12-30		malou	Single (never married)	1	Housewife	1	3	4		13	1	Known Pos on ART	2	1 visit	1	1	At home	2	Live Birth-LB	1	Already on ART	1	2019-12-30	1f = TDF/3TC/EFV	6		2019-12-30	Breastfeeding	2020-04-28	120	3-5 months	2	180	174	6	Yes	1	Suppressed	1	2021-10-20	540	660
52	IMPORTA-1077	1	2022-08-31	Arach Maker Arach	Rumbek Hospital	2	2019-12-20	38	malakia	Single (never married)	1	Housewife	1	3	4		9	1	Known Pos on ART	2	2 visits	2	2	At Health Facility	1	Live Birth-LB	1	Already on ART	1	2018-04-23	1f = TDF/3TC/EFV	6		2019-12-20	Pregnant	2020-03-20	91	3-5 months	2	90	90	0	Yes	1	Suppressed	1	2020-03-20	0	91
53	IMPORTA-1078	1	2022-08-31	Arach Maker Arach	Rumbek Hospital	2	2019-11-29	26	akoljal	Married Monogamous	2	Housewife	1	3			25	2	Known Pos on ART	2	2 visits	2	2	At home	2	Live Birth-LB	1	Already on ART	1		1f = TDF/3TC/EFV	6		2019-11-29	Breastfeeding	2020-05-29	182	6+ months	3	180	165	15	Yes	1	Suppressed	1	2020-12-22	207	389
54	IMPORTA-1079	1	2022-08-31	Arach Maker Arach	Rumbek Hospital	2	2019-11-29	38	pulcuei	Married Polygamous	2	Housewife	1	3	4	43874	25	2	Known Pos on ART	2				At home	2	Live Birth-LB	1	New on ART -- in pregnancy	2		1f = TDF/3TC/EFV	6		2019-11-29	Pregnant	2020-05-29	182	6+ months	3	180	78	102	No	2	NA	3	2020-09-18	112	294
147	IMPORTA-1081	1	2022-09-02	Arach Maker Arach	Rumbek Hospital	2	2021-12-03	28	malakia	Single (never married)	1	Housewife	1	2			30	2	Known Pos on ART	2	2 visits	2	2	At Health Facility	1	Live Birth-LB	1	Already on ART	1	2019-08-03	1c = TDF/3TC/DTG	3		2021-12-03	Pregnant	2022-06-03	182	6+ months	3	180	157	23	Yes	1	Suppressed	1	2022-05-10	-24	158
148	IMPORTA-1082	1	2022-09-02	Arach Maker Arach	Rumbek Hospital	2	2021-12-09	22	akuach	Married Polygamous	2	Housewife	1	3	3				Known Pos on ART	2	1 visit	1	1	At Health Facility	1	Live Birth-LB	1	Already on ART	1	2020-07-14	1c = TDF/3TC/DTG	3		2021-12-09	Pregnant	2022-06-09	182	6+ months	3	180	130	50	Yes	1	Suppressed	1	2022-04-19	-51	131
149	IMPORTA-1083	1	2022-09-02	Arach Maker Arach	Rumbek Hospital	2	2021-12-13	23	paloch	Married Polygamous	2	Housewife	1	6	3	44668	26	2	Newly tested at ANC	1	1 visit	1	1	At home	2	Live Birth-LB	1	New on ART -- in pregnancy	2	2021-12-13	1c = TDF/3TC/DTG	3		2021-12-13	Pregnant	2022-06-13	182	6+ months	3	180	228	-48	No	2	NA	3	2022-08-01	49	231
1	IMPORTA-1084	1	2022-09-01	Jessry Pasquali	Yambio Hospital	2	2019-11-08	18	Timbiro	Married Monogamous	2	Housewife	1	1	1	43877	20	2	Newly tested at ANC	1				At Health Facility	1	Live Birth-LB	1	New on ART -- in pregnancy	2	2019-11-08	1c = TDF/3TC/DTG	3		2019-11-08	Pregnant	2019-11-22	14	<3 months	1	14	14	0	NA	3	NA	3	2019-11-22	0	14
2	IMPORTA-1085	1	2022-09-01	Jany Danambutiyo	Yambio PHCC	2	2019-11-12	21	Yabongo	Single (never married)	1	Unemployed	1	1	1	44214	30	2	Newly tested at ANC	1	1 visit	1	1	At home	2	Live Birth-LB	1	New on ART -- in pregnancy	2	2019-11-12	1c = TDF/3TC/DTG	3		2019-11-12	Pregnant	2019-11-26	14	<3 months	1	14	14	0	NA	3	NA	3	2019-12-12	16	30
3	IMPORTA-1086	1	2022-09-01	Jany Danambutiyo	Yambio PHCC	2	2019-11-14	24	Timbiro	Married Monogamous	2	Housewife	1	1	1	43891	20	2	Newly tested at ANC	1	1 visit	1	1	At Health Facility	1	Live Birth-LB	1	New on ART -- in pregnancy	2	2019-11-14	1c = TDF/3TC/DTG	3		2019-11-14	Pregnant	2019-11-28	14	<3 months	1	14	14	0	NA	3	NA	3	2020-01-24	57	71
4	IMPORTA-1087	1	2022-09-01	Jany Danambutiyo	Yambio PHCC	2		20	Glemilia	Married Monogamous	2	Salaried Employee	2				8	1	Known Pos on ART	2	2 visits	2	2	At home	2	Live Birth-LB	1	New on ART -- postpartum	2	2019-11-25	1c = TDF/3TC/DTG	3		2019-11-25	Breastfeeding	2019-12-09	14	<3 months	1	14	14	0	NA	3	NA	3	2019-12-09	0	14
5	IMPORTA-1088	1	2022-09-01	Jany Danambutiyo	Yambio PHCC	2	2019-11-25	19	Kabam	Married Monogamous	2	Farming	2	2	3	44819			Newly tested at ANC	1	4 or more visits	4	3	At home	2	Live Birth-LB	1			2019-11-25	1c = TDF/3TC/DTG	3		2019-11-25	Pregnant	2019-12-09	14	<3 months	1	14	14	0	NA	3	NA	3	2020-01-23	45	59
6	IMPORTA-1089	1	2022-09-01	Jany Danambutiyo	Yambio PHCC	2	2019-12-02	34	Ikpiro	Married Polygamous	2	Unemployed	1			43880	24	2	Newly tested at ANC	1	1 visit	1	1	At Health Facility	1	Live Birth-LB	1	New on ART -- in pregnancy	2	2019-12-02	1c = TDF/3TC/DTG	3		2019-12-02	Pregnant	2020-01-02	31	<3 months	1	30	30	0	NA	3	NA	3	2020-01-02	0	31
7	IMPORTA-1090	1	2022-09-01	Jany Danambutiyo	Yambio PHCC	2		27	Nagori	Married Monogamous	2	Farming	2	2	3		15	1	Breastfeeding	1				At home	2	Live Birth-LB	1	New on ART -- postpartum	2	2019-12-03	1c = TDF/3TC/DTG	3		2019-12-03	Breastfeeding	2020-01-03	31	<3 months	1	30	30	0	NA	3	NA	3	2020-01-03	0	31
8	IMPORTA-1091	1	2022-09-01	Jany Danambutiyo	Yambio PHCC	2		30	Nanua	Married Monogamous	2	Farming	2						Breastfeeding	1				At home	2	Live Birth-LB	1	New on ART -- postpartum	2	2019-12-03	1c = TDF/3TC/DTG	3		2019-12-03	Breastfeeding	2020-01-03	31	<3 months	1	30	30	0	NA	3	NA	3	2020-01-03	0	31
9	IMPORTA-1092	1	2022-09-01	Jany Danambutiyo	Yambio PHCC	2		23	Akorogbodi	Married Monogamous	2	Unemployed	1				18	2	Breastfeeding	1	1 visit	1	1	At home	2	Live Birth-LB	1	New on ART -- postpartum	2	2020-01-03	1c = TDF/3TC/DTG	3		2020-01-03	Breastfeeding	2020-02-03	31	<3 months	1	30	30	0	NA	3	NA	3	2020-02-12	9	40
10	IMPORTA-1093	1	2022-09-01	Jany Danambutiyo	Yambio PHCC	2	2020-01-09	28	Gl emilia	Single (never married)	1	Housewife	1	3		43922	26	2						At Health Facility	1	Live Birth-LB	1	New on ART -- in pregnancy	2	2020-01-09	1c = TDF/3TC/DTG	3		2020-01-09	Pregnant	2020-02-10	32	<3 months	1	30	30	0	NA	3	NA	3	2020-02-07	-3	29
11	IMPORTA-1094	1	2022-09-01	Jany Danambutiyo	Yambio PHCC	2	2020-01-14	25	Mukongo	Married Monogamous	2	Business (Man/Women)/trader	2	2	3	43983	20	2	Newly tested at ANC	1	1 visit	1	1	At home	2	Live Birth-LB	1			2020-01-14	1c = TDF/3TC/DTG	3		2020-01-14	Pregnant	2020-02-14	31	<3 months	1	30	30	0	NA	3	NA	3	2020-04-14	60	91
12	IMPORTA-1095	1	2022-09-01	Jany Danambutiyo	Yambio PHCC	2	2020-02-17	20	Hai Tarawa	Married Monogamous	2	Farming	2	2	2	43998	18	2	Newly tested at ANC	1	1 visit	1	1	At home	2	Live Birth-LB	1	New on ART -- in pregnancy	2	2020-02-17	1c = TDF/3TC/DTG	3		2020-02-17	Pregnant	2020-03-17	29	<3 months	1	30	30	0	NA	3	NA	3	2020-03-18	1	30
13	IMPORTA-1096	1	2022-09-01	Jany Danambutiyo	Yambio PHCC	2	2020-03-31	35	Nagori	Single (never married)	1	Farming	2		3	44055	14	1	Newly tested at ANC	1	1 visit	1	1	At home	2	Still Birth-MSB or FSB	2	Already on ART	1	2020-03-31	1c = TDF/3TC/DTG	3		2020-03-31	Pregnant	2020-09-30	183	6+ months	3	180	180	0	NA	3	NA	3	2020-09-21	-9	174
14	IMPORTA-1097	1	2022-09-01	Jany Danambutiyo	Yambio PHCC	2		20	VTC	Single (never married)	1	Farming	2		4		38	2	Breastfeeding	1	1 visit	1	1	At Health Facility	1	Live Birth-LB	1	New on ART -- postpartum	2	2020-04-14	1c = TDF/3TC/DTG	3		2020-04-14	Breastfeeding	2020-10-14	183	6+ months	3	180	180	0	NA	3	NA	3	2020-10-14	0	183
15	IMPORTA-1098	1	2022-09-01	Jany Danambutiyo	Yambio PHCC	2	2020-04-15	15	Yambio Hospital	Married Polygamous	2	Farming	2	3	1	43995	20	2	Newly tested at ANC	1	1 visit	1	1	At Health Facility	1	Live Birth-LB	1	New on ART -- in pregnancy	2	2020-04-15	1c = TDF/3TC/DTG	3		2020-04-15	Pregnant	2020-10-15	183	6+ months	3	180	180	0	NA	3	NA	3	2020-11-12	28	211
16	IMPORTA-1099	1	2022-09-01	Jany Danambutiyo	Yambio PHCC	2	2020-04-20	31	Baiparu	Married Monogamous	2	Housewife	1			44082	18	2	Newly tested at ANC	1	1 visit	1	1	At Health Facility	1	Live Birth-LB	1	New on ART -- in pregnancy	2		1c = TDF/3TC/DTG	3		2020-04-20	Pregnant	2020-10-20	183	6+ months	3	180	180	0	Yes	1	Suppressed	1	2020-10-14	-6	177
17	IMPORTA-1100	1	2022-09-02	Jany Danambutiyo	Yambio PHCC	2	2020-05-04	24	Mameze	Married Monogamous	2	Business (Man/Women)/trader	2		3	43974			Newly tested at ANC	1	3 visits	3	3	At Health Facility	1	Still Birth-MSB or FSB	2	New on ART -- in pregnancy	2	2020-05-04	1c = TDF/3TC/DTG	3		2020-05-04	Pregnant	2020-11-04	184	6+ months	3	180	180	0	NA	3	NA	3	2020-10-19	-16	168
18	IMPORTA-1101	1	2022-09-02	Jany Danambutiyo	Yambio PHCC	2	2020-05-20	25	Napere	Married Monogamous	2	Unemployed	1	2					Newly tested at ANC	1	1 visit	1	1	At home	2	Live Birth-LB	1	New on ART -- in pregnancy	2	2020-05-20	1c = TDF/3TC/DTG	3		2020-05-20	Pregnant	2020-11-19	183	6+ months	3	180	180	0	NA	3	NA	3	2021-01-12	54	237
19	IMPORTA-1102	1	2022-09-02	Jany Danambutiyo	Yambio PHCC	2	2020-06-05	28	Timbiro	Married Monogamous	2	Farming	2		3	44071	28	2	Newly tested at ANC	1	1 visit	1	1	At Health Facility	1	Still Birth-MSB or FSB	2	New on ART -- in pregnancy	2	2020-06-05	1c = TDF/3TC/DTG	3		2020-06-05	Pregnant	2020-12-04	182	6+ months	3	180	180	0	No	2	NA	3	2021-01-21	48	230
20	IMPORTA-1103	1	2022-09-02	Jany Danambutiyo	Yambio PHCC	2	2020-07-01	18	Hai Kuba	Married Monogamous	2	Salaried Employee	2	1		44219	15	1	Newly tested at ANC	1	1 visit	1	1	At Health Facility	1	Live Birth-LB	1	New on ART -- in pregnancy	2	2020-07-01	1c = TDF/3TC/DTG	3		2020-07-01	Pregnant	2021-01-07	190	6+ months	3	180	180	0	No	2	NA	3	2021-01-04	-3	187
21	IMPORTA-1104	1	2022-09-02	Jany Danambutiyo	Yambio PHCC	2	2020-07-08	18	Kpirabe	Married Polygamous	2	Housewife	1	3	1	44145	24	2	Newly tested at ANC	1	1 visit	1	1	At Health Facility	1	Live Birth-LB	1	Already on ART	1	2020-07-08	1c = TDF/3TC/DTG	3		2020-07-08	Pregnant	2021-01-07	183	6+ months	3	180	180	0	No	2	NA	3	2021-02-25	49	232
22	IMPORTA-1105	1	2022-09-02	Jany Danambutiyo	Yambio PHCC	2	2020-07-14	20	Akorogbodi			Housewife	1	2	1	44173	18	2	Newly tested at ANC	1	1 visit	1	1	At Health Facility	1	Live Birth-LB	1	New on ART -- in pregnancy	2	2020-07-14	1c = TDF/3TC/DTG	3		2020-07-14	Pregnant	2021-02-02	203	6+ months	3	180	180	0	Yes	1	Suppressed	1	2021-02-02	0	203
23	IMPORTA-1106	1	2022-09-02	Jany Danambutiyo	Yambio PHCC	2	2020-08-12	23	Akorogbodi	Married Monogamous	2	Housewife	1	2	1	44228	8	1	Newly tested at ANC	1	1 visit	1	1	At Health Facility	1	Live Birth-LB	1	New on ART -- in pregnancy	2	2020-08-12	1c = TDF/3TC/DTG	3		2020-08-12	Pregnant	2021-02-10	182	6+ months	3	180	180	0	Yes	1	Suppressed	1	2021-02-12	2	184
24	IMPORTA-1107	1	2022-09-02	Jany Danambutiyo	Yambio PHCC	2	2020-08-20	26	Naduru	Married Monogamous	2	Salaried Employee	2	2	3	44063	32	2	Newly tested at ANC	1	1 visit	1	1	At Health Facility	1	Live Birth-LB	1			2020-09-21	1c = TDF/3TC/DTG	3		2020-09-21	Pregnant	2021-03-19	179	3-5 months	2	180	180	0	No	2	NA	3	2021-03-23	4	183
25	IMPORTA-1108	1	2022-09-02	Jany Danambutiyo	Yambio PHCC	2	2020-10-19	20	Gl Emilia	Single (never married)	1	Unemployed	1	1	3	44314	10	1	Newly tested at ANC	1	1 visit	1	1	At home	2	Live Birth-LB	1	New on ART -- in pregnancy	2		1c = TDF/3TC/DTG	3		2020-09-19	Pregnant	2021-04-19	212	6+ months	3	180	180	0	No	2	NA	3	2021-04-27	8	220
26	IMPORTA-1109	1	2022-09-02	Jany Danambutiyo	Yambio PHCC	2	2020-10-28	16	Kuzee	Single (never married)	1	Student	1	2	1	44216	22	2	Newly tested at ANC	1				At Health Facility	1	Live Birth-LB	1	New on ART -- in pregnancy	2		1c = TDF/3TC/DTG	3		2020-11-02	Pregnant	2021-05-03	182	6+ months	3	180	180	0	Yes	1	Suppressed	1	2021-05-17	14	196
27	IMPORTA-1110	1	2022-09-02	Jany Danambutiyo	Yambio PHCC	2	2020-11-16	27	Naduru	Married Monogamous	2	Housewife	1		3	43896			Newly tested at ANC	1				At Health Facility	1	Live Birth-LB	1	New on ART -- in pregnancy	2	2020-11-16	1c = TDF/3TC/DTG	3		2020-10-16	Pregnant	2021-05-17	213	6+ months	3	180	180	0	Yes	1	Suppressed	1	2021-05-11	-6	207
28	IMPORTA-1111	1	2022-09-02	Jany Danambutiyo	Yambio PHCC	2	2020-11-30	23	Kuzee	Married Monogamous	2	Business (Man/Women)/trader	2	3	3	44275			Newly tested at ANC	1	1 visit	1	1	At Health Facility	1	Live Birth-LB	1	New on ART -- in pregnancy	2	2020-11-30	1c = TDF/3TC/DTG	3		2020-11-30	Pregnant	2021-05-28	179	3-5 months	2	180	180	0	Yes	1	Suppressed	1	2021-05-27	-1	178
29	IMPORTA-1112	1	2022-09-02	Jany Danambutiyo	Yambio PHCC	2	2020-11-24	21	Stadium	Single (never married)	1	Unemployed	1		3	44209	30	2	Newly tested at ANC	1	3 visits	3	3	At Health Facility	1	Live Birth-LB	1	New on ART -- in pregnancy	2	2020-11-24	1c = TDF/3TC/DTG	3		2020-11-24	Pregnant	2021-05-24	181	6+ months	3	180	180	0	No	2	NA	3	2021-06-07	14	195
30	IMPORTA-1113	1	2022-09-02	Jany Danambutiyo	Yambio PHCC	2	2020-12-02	26	Akorogbodi	Single (never married)	1	Business (Man/Women)/trader	2	2	3	44241	24	2	Newly tested at ANC	1	1 visit	1	1	At home	2	Live Birth-LB	1	New on ART -- in pregnancy	2	2020-12-02	1c = TDF/3TC/DTG	3		2020-12-02	Pregnant	2021-06-02	182	6+ months	3	180	180	0	Yes	1	Suppressed	1	2021-06-22	20	202
31	IMPORTA-1114	1	2022-09-05	Jany Danambutiyo	Yambio PHCC	2	2021-01-06	20	Nagori	Married Monogamous	2	Housewife	1		2	44348	26	2	Newly tested at ANC	1	1 visit	1	1	At home	2	Live Birth-LB	1	New on ART -- in pregnancy	2	2021-01-06	1c = TDF/3TC/DTG	3		2021-01-06	Pregnant	2021-07-06	181	6+ months	3	180	180	0	No	2	NA	3		44383
32	IMPORTA-1115	1	2022-09-05	Jany Danambutiyo	Yambio PHCC	2	2021-01-07	20	Pajuo	Married Monogamous	2	Housewife	1	2	3	44262	32	2	Newly tested at ANC	1	2 visits	2	2	At Health Facility	1	Live Birth-LB	1	New on ART -- in pregnancy	2	2021-01-07	1c = TDF/3TC/DTG	3		2021-01-07	Pregnant	2021-07-07	181	6+ months	3	180	180	0	Yes	1	Suppressed	1	2021-07-13	6	187
33	IMPORTA-1116	1	2022-09-05	Jany Danambutiyo	Yambio PHCC	2	2021-02-11	20	Akorogbodi	Married Monogamous	2	Housewife	1	1		44444	10	1	Newly tested at ANC	1	1 visit	1	1	At home	2	Live Birth-LB	1	New on ART -- in pregnancy	2	2021-02-11	1c = TDF/3TC/DTG	3		2021-02-01	Pregnant	2021-12-11	313	6+ months	3	180	180	0	No	2	NA	3	2021-08-09	-124	189
34	IMPORTA-1117	1	2022-09-05	Jany Danambutiyo	Yambio PHCC	2	2021-05-18	31	Yabongo	Married Monogamous	2	Student	1	3		44557	12	1	Known Pos on ART	2	1 visit	1	1	At home	2	Live Birth-LB	1	Already on ART	1	2021-04-28	1c = TDF/3TC/DTG	3		2021-04-28	Pregnant	2021-11-05	191	6+ months	3	188	188	0	Yes	1	Suppressed	1	2021-11-01	-4	187
35	IMPORTA-1118	1	2022-09-05	Jany Danambutiyo	Yambio PHCC	2		21	Akorogbodi	Married Monogamous	2	Housewife	1	2	3		18	2	Breastfeeding	1	2 visits	2	2	At Health Facility	1	Live Birth-LB	1	New on ART -- postpartum	2	2021-05-05	1c = TDF/3TC/DTG	3		2021-05-05	Breastfeeding	2021-11-05	184	6+ months	3	180	180	0	No	2	NA	3	2021-11-09	4	188
36	IMPORTA-1119	1	2022-09-05	Jany Danambutiyo	Yambio PHCC	2		29	Nakpangau	Married Polygamous	2	Other Uniformed forces (Police, Wildlife, Prisons, Fire Brigade)	2	3	3		23	2	Breastfeeding	1	2 visits	2	2	At home	2	Live Birth-LB	1	New on ART -- postpartum	2	2022-05-24	1c = TDF/3TC/DTG	3		2021-05-24	Breastfeeding	2021-11-24	184	6+ months	3	180	180	0	No	2	NA	3	2021-12-13	19	203
37	IMPORTA-1120	1	2022-09-05	Jany Danambutiyo	Yambio PHCC	2	2021-06-07	18	Malekia			Student	1	2	1	44482	20	2	Newly tested at ANC	1	1 visit	1	1	At home	2	Live Birth-LB	1	New on ART -- in pregnancy	2	2021-06-07	1c = TDF/3TC/DTG	3		2021-06-07	Pregnant	2021-12-07	183	6+ months	3	180	180	0	Yes	1	Suppressed	1	2021-12-13	6	189
38	IMPORTA-1121	1	2022-09-05	Jany Danambutiyo	Yambio PHCC	2		25	Naduru	Widowed	3	Farming	2		3		11	1	Breastfeeding	1	2 visits	2	2	At home	2	Live Birth-LB	1	New on ART -- postpartum	2	2021-08-10	1c = TDF/3TC/DTG	3		2021-08-10	Breastfeeding	2022-02-09	183	6+ months	3	180	180	0	No	2	NA	3	2022-03-09	28	211
39	IMPORTA-1122	1	2022-09-05	Jany Danambutiyo	Yambio PHCC	2	2021-08-13	27	Baiparu	Married Monogamous	2	Salaried Employee	2		3	44547			Newly tested at ANC	1	1 visit	1	1	At home	2	Live Birth-LB	1	New on ART -- in pregnancy	2	2021-08-13	1c = TDF/3TC/DTG	3		2021-08-13	Pregnant	2022-02-11	182	6+ months	3	180	180	0	No	2	NA	3	2022-02-15	4	186
40	IMPORTA-1123	1	2022-09-05	Jany Danambutiyo	Yambio PHCC	2	2021-08-20	18	Akorogbodi	Married Monogamous	2	Unemployed	1	2	1	44703			Newly tested at ANC	1	1 visit	1	1	At home	2	Live Birth-LB	1	New on ART -- in pregnancy	2	2021-08-20	1c = TDF/3TC/DTG	3		2021-08-20	Pregnant	2022-02-21	185	6+ months	3	180	180	0	No	2	NA	3	2022-02-22	1	186
41	IMPORTA-1124	1	2022-09-05	Jany Danambutiyo	Yambio PHCC	2		18	Baiparu	Married Monogamous	2	Student	1		3		12	1	Breastfeeding	1				At Health Facility	1	Live Birth-LB	1	New on ART -- in pregnancy	2	2021-09-27	1c = TDF/3TC/DTG	3		2021-09-27	Breastfeeding	2022-03-26	180	6+ months	3	180	180	0	No	2	NA	3	2022-04-26	31	211
42	IMPORTA-1125	1	2022-09-05	Jany Danambutiyo	Yambio PHCC	2	2021-10-07	20	Mameze	Married Polygamous	2	Unemployed	1	1	2	44540	10	1	Newly tested at ANC	1				At Health Facility	1	Live Birth-LB	1	New on ART -- in pregnancy	2		1c = TDF/3TC/DTG	3		2021-10-07	Pregnant	2022-04-07	182	6+ months	3	180	180	0	No	2	NA	3		44658
43	IMPORTA-1126	1	2022-09-05	Jany Danambutiyo	Yambio PHCC	2	2021-10-13	18	Baiparu	Married Monogamous	2	Housewife	1	1	2	44327	8	1	Newly tested at ANC	1	1 visit	1	1	At home	2	Live Birth-LB	1	New on ART -- in pregnancy	2	2021-10-13	1c = TDF/3TC/DTG	3		2021-10-13	Pregnant	2022-04-13	182	6+ months	3	180	180	0	No	2	NA	3	2022-04-13	0	182
44	IMPORTA-1127	1	2022-09-05	Jany Danambutiyo	Yambio PHCC	2	2021-10-27	19	Pazuo	Married Monogamous	2	Unemployed	1		2	44552			Newly tested at ANC	1	1 visit	1	1	At home	2	Live Birth-LB	1	New on ART -- in pregnancy	2	2021-10-27	1c = TDF/3TC/DTG	3		2021-10-27	Pregnant	2022-04-27	182	6+ months	3	180	180	0	Yes	1	Unsuppressed	2	2022-03-18	-40	142
45	IMPORTA-1128	1	2022-09-05	Jany Danambutiyo	Yambio PHCC	2	2021-10-28	26	Betuemic	Married Polygamous	2	Farming	2	3		44708			Newly tested at ANC	1	1 visit	1	1	At Health Facility	1	Live Birth-LB	1	New on ART -- in pregnancy	2		1c = TDF/3TC/DTG	3		2021-10-28	Pregnant	2022-04-28	182	6+ months	3	180	180	0	No	2	NA	3	2022-04-27	-1	181
46	IMPORTA-1129	1	2022-09-05	Jany Danambutiyo	Yambio PHCC	2		25	Hai Tarawa	Married Monogamous	2	Business (Man/Women)/trader	2	5			28	2	Breastfeeding	1	1 visit	1	1	At home	2	Live Birth-LB	1	New on ART -- in pregnancy	2		1c = TDF/3TC/DTG	3		2021-10-26	Breastfeeding	2022-04-28	184	6+ months	3	180	180	0	No	2	NA	3	2022-03-25	-34	150
47	IMPORTA-1130	1	2022-09-05	Jany Danambutiyo	Yambio PHCC	2	2021-11-02	28	Kazee	Married Monogamous	2	Business (Man/Women)/trader	2	3	3	44527	36	2	Newly tested at ANC	1	3 visits	3	3	At Health Facility	1	Live Birth-LB	1	New on ART -- in pregnancy	2	2021-11-02	1c = TDF/3TC/DTG	3		2021-11-02	Pregnant	2022-05-02	181	6+ months	3	180	180	0	No	2	NA	3	2022-05-11	9	190
48	IMPORTA-1131	1	2022-09-05	Jany Danambutiyo	Yambio PHCC	2	2021-11-26	25	Baiparu	Married Monogamous	2	Housewife	1			44652	16	2	Newly tested at ANC	1	1 visit	1	1	At home	2	Live Birth-LB	1	New on ART -- in pregnancy	2	2021-11-26	1c = TDF/3TC/DTG	3		2021-11-26	Pregnant	2022-05-26	181	6+ months	3	180	180	0	No	2	NA	3	2022-05-25	-1	180
49	IMPORTA-1132	1	2022-09-05	Jany Danambutiyo	Yambio PHCC	2	2021-07-06	23	Akorogbodi			Unemployed	1		3	44736	14	1	Newly tested at ANC	1	1 visit	1	1	At Health Facility	1	Live Birth-LB	1	New on ART -- postpartum	2	2021-12-06	1c = TDF/3TC/DTG	3		2021-12-06	Pregnant	2022-06-06	182	6+ months	3	180	180	0	Yes	1	Suppressed	1	2022-06-02	-4	178
50	IMPORTA-1133	1	2022-09-05	Jany Danambutiyo	Yambio PHCC	2	2022-01-30	27	Timbiro	Married Monogamous	2	Housewife	1	1	2		18	2	Newly tested at ANC	1	1 visit	1	1	At home	2	Live Birth-LB	1	New on ART -- in pregnancy	2	2022-01-03	1c = TDF/3TC/DTG	3		2022-01-03	Pregnant	2022-07-04	182	6+ months	3	180	180	0	No	2	NA	3	2022-07-05	1	183
51	IMPORTA-1134	1	2022-09-05	Jany Danambutiyo	Yambio PHCC	2	2022-01-27	16	Makpandiu	Married Monogamous	2	Housewife	1	5	1	44628	12	1	Newly tested at ANC	1	2 visits	2	2	At Health Facility	1	Live Birth-LB	1	New on ART -- in pregnancy	2	2022-01-07	1c = TDF/3TC/DTG	3		2022-01-27	Pregnant	2022-07-27	181	6+ months	3	180	180	0	No	2	NA	3		44769
56	IMPORTA-1139	1	2022-09-05	Jany Danambutiyo	Yambio PHCC	2		25	Pazuo	Divorced/separated	3	Other Uniformed forces (Police, Wildlife, Prisons, Fire Brigade)	2	4	4		18	2	Breastfeeding	1	1 visit	1	1	At home	2	Live Birth-LB	1	New on ART -- postpartum	2	2021-06-23	1c = TDF/3TC/DTG	3		2021-06-23	Breastfeeding	2021-12-17	177	3-5 months	2	180	10	170	NA	3	NA	3	2021-12-17	0	177
57	IMPORTA-1140	1	2022-09-05	Jany Danambutiyo	Yambio PHCC	2	2020-08-13	17	Kpirabe	Married Monogamous	2	Housewife	1	2	1	44263	12	1	Newly tested at ANC	1	2 visits	2	2	At Health Facility	1	Live Birth-LB	1	Already on ART	1	2021-02-09	1c = TDF/3TC/DTG	3		2021-02-09	Pregnant	2021-09-09	212	6+ months	3	180	180	0	Yes	1	Unsuppressed	2	2021-08-02	-38	174
58	IMPORTA-1141	1	2022-09-05	Jany Danambutiyo	Yambio PHCC	2	2022-02-08	20	Nagori	Married Monogamous	2	Housewife	1	1	2	44308	34	2	Known Pos not on ART	2	1 visit	1	1	At Health Facility	1	Live Birth-LB	1	New on ART -- in pregnancy	2	2022-03-03	1c = TDF/3TC/DTG	3		2021-03-04	Pregnant	2021-09-03	183	6+ months	3	180	180	0	Yes	1	Suppressed	1	2021-09-07	4	187
59	IMPORTA-1142	1	2022-09-05	Jany Danambutiyo	Yambio PHCC	2	2021-09-01	28	Pasuo	Divorced/separated	3	Unemployed	1	2	3	44650	14	1	Newly tested at ANC	1	1 visit	1	1	At home	2	Live Birth-LB	1	New on ART -- in pregnancy	2		1c = TDF/3TC/DTG	3		2021-09-01	Pregnant	2022-03-01	181	6+ months	3	180	180	0	Yes	1	Suppressed	1	2022-03-02	1	182
60	IMPORTA-1143	1	2022-09-05	Jany Danambutiyo	Yambio PHCC	2		40	Napere	Married Polygamous	2	Salaried Employee	2	2	4		11	1	Breastfeeding	1	3 visits	3	3	At Health Facility	1	Live Birth-LB	1	New on ART -- in pregnancy	2	2020-11-20	1c = TDF/3TC/DTG	3		2021-11-20	Breastfeeding	2022-05-20	181	6+ months	3	180	180	0	NA	3	NA	3	2021-06-09	-345
61	IMPORTA-1144	1	2022-09-05	Jany Danambutiyo	Yambio PHCC	2		23	Napere	Married Monogamous	2	Business (Man/Women)/trader	2	1	3				Breastfeeding	1	1 visit	1	1	At Health Facility	1	Live Birth-LB	1	New on ART -- postpartum	2	2020-11-19	1c = TDF/3TC/DTG	3		2021-11-19	Breastfeeding	2021-05-19				180	180	0	NA	3	NA	3	2021-05-28	9
62	IMPORTA-1145	1	2022-09-05	Jany Danambutiyo	Yambio PHCC	2	2020-11-19	24	Napere	Single (never married)	1	Salaried Employee	2	1		44220	30	2	Newly tested at ANC	1	1 visit	1	1	At Health Facility	1	Live Birth-LB	1	New on ART -- in pregnancy	2	2020-11-19	1c = TDF/3TC/DTG	3		2020-11-19	Pregnant	2022-05-19	546	6+ months	3	180	180	0	NA	3	NA	3	2021-05-19	-365	181
64	IMPORTA-1146	1	2022-09-05	Jany Danambutiyo	Yambio PHCC	2	2020-06-20	27	Nabagu	Single (never married)	1	Housewife	1		3	44063	28	2	Newly tested at ANC	1	1 visit	1	1	At Health Facility	1	Live Birth-LB	1	New on ART -- in pregnancy	2	2020-06-22	1c = TDF/3TC/DTG	3		2020-06-22	Pregnant	2021-12-18	544	6+ months	3	180	180	0	Yes	1	Suppressed	1	2020-12-07	-376	168
64	IMPORTA-1147	1	2022-09-05	Jany Danambutiyo	Yambio PHCC	2		25	Nagori	Married Monogamous	2	Unemployed	1						Breastfeeding	1	1 visit	1	1	At Health Facility	1	Live Birth-LB	1	New on ART -- postpartum	2	2020-09-09	1c = TDF/3TC/DTG	3		2020-11-09	Breastfeeding	2021-05-10	182	6+ months	3	180	180	0	No	2	NA	3	2021-05-10	0	182
65	IMPORTA-1148	1	2022-09-05	Jany Danambutiyo	Yambio PHCC	2		31		Single (never married)	1	Other Uniformed forces (Police, Wildlife, Prisons, Fire Brigade)	2	1	3				Breastfeeding	1	1 visit	1	1	At Health Facility	1	Live Birth-LB	1	New on ART -- postpartum	2	2021-01-06	1c = TDF/3TC/DTG	3		2021-01-06	Breastfeeding	2021-07-06	181	6+ months	3	180	180	0	NA	3	NA	3	2021-07-15	9	190
66	IMPORTA-1149	1	2022-09-05	Jany Danambutiyo	Yambio PHCC	2	2022-02-17	17	Asanza	Single (never married)	1	Housewife	1	1	2	44483	38	2	Newly tested at ANC	1	1 visit	1	1	At home	2	Live Birth-LB	1	New on ART -- in pregnancy	2	2021-07-17	1c = TDF/3TC/DTG	3		2021-02-17	Pregnant	2021-08-17	181	6+ months	3	180	180	0	NA	3	NA	3	2021-09-01	15	196
67	IMPORTA-1150	1	2022-09-05	Jany Danambutiyo	Yambio PHCC	2	2021-08-19	25	Nagory			Other Uniformed forces (Police, Wildlife, Prisons, Fire Brigade)	2		3		16	2	Newly tested at ANC	1				At Health Facility	1	Live Birth-LB	1	New on ART -- in pregnancy	2	2021-08-19	1c = TDF/3TC/DTG	3		2021-08-19	Pregnant	2022-02-18	183	6+ months	3	180	180	0	Yes	1	Suppressed	1	2022-02-18	0	183
68	IMPORTA-1151	1	2022-09-05	Jessry Pasquali	Yambio Hospital	2	2021-04-28	35	Baiparu	Single (never married)	1	Unemployed	1			44409			Newly tested at ANC	1				At Health Facility	1	Live Birth-LB	1	New on ART -- in pregnancy	2	2021-04-28	1c = TDF/3TC/DTG	3		2021-04-28	Pregnant	2021-10-28	183	6+ months	3	180	180	0	NA	3	NA	3	2021-10-28	0	183
69	IMPORTA-1152	1	2022-09-05	Jany Danambutiyo	Yambio PHCC	2		27	Stadium	Married Monogamous	2	Housewife	1	1	1	44466	8	1	Breastfeeding	1	3 visits	3	3	At home	2	Live Birth-LB	1	New on ART -- in pregnancy	2	2021-08-30	1c = TDF/3TC/DTG	3		2021-08-30	Pregnant	2022-03-02	184	6+ months	3	180	180	0	NA	3	NA	3	2022-03-02	0	184
1	IMPORTA-1154	1	2022-09-10	Zachariah Mabor Nyinypiu	Yirol Hospital	3	2022-01-28	20	Nyop	Married Monogamous	2	Housewife	1	1	1		9	1	Newly tested at ANC	1	1 visit	1	1	At Health Facility	1	Live Birth-LB	1	New on ART -- in pregnancy	2	2022-01-28	1c = TDF/3TC/DTG	3		2022-01-28	Pregnant	2022-05-05	97	3-5 months	2	90	90	0	NA	3	NA	3	2022-05-05	0	97
2	IMPORTA-1155	1	2022-09-10	Zachariah Mabor Nyinypiu	Yirol Hospital	3	2022-01-26	19	Amethic	Married Monogamous	2	Housewife	1		1				Known Pos on ART	2	2 visits	2	2	At Health Facility	1			Already on ART	1	2022-01-26	1c = TDF/3TC/DTG	3		2022-09-26	Pregnant	2022-03-21				90	90	0	NA	3	NA	3	2022-03-26	5
3	IMPORTA-1156	1	2022-09-10	Zachariah Mabor Nyinypiu	Yirol Hospital	3	2022-01-25	20	Adhiem	Married Monogamous	2	Housewife	1				32	2	Known Pos on ART	2	1 visit	1	1	At Health Facility	1	Live Birth-LB	1	Already on ART	1	2022-01-25	1c = TDF/3TC/DTG	3		2022-01-25	Pregnant	2022-02-22	28	<3 months	1	90	90	0	NA	3	NA	3	2022-05-22	89	117
5	IMPORTA-1158	1	2022-09-10	Zachariah Mabor Nyinypiu	Yirol Hospital	3	2021-12-08	23	Paukar	Married Monogamous	2	Housewife	1	1	2	44703			Newly tested at ANC	1	1 visit	1	1	At Health Facility	1	Live Birth-LB	1	New on ART -- in pregnancy	2	2021-12-08	1c = TDF/3TC/DTG	3		2021-12-10	Pregnant	2022-03-10	90	3-5 months	2	90	90	0	NA	3	NA	3	2022-03-10	0	90
6	IMPORTA-1159	1	2022-09-09	Zachariah Mabor Nyinypiu	Yirol Hospital	3	2021-12-08	28	Panakot	Married Monogamous	2	Housewife	1		3	44588	14	1	Known Pos on ART	2	2 visits	2	2	At Health Facility	1	Live Birth-LB	1			2021-12-08	1c = TDF/3TC/DTG	3		2021-12-08	Pregnant	2022-03-08	90	3-5 months	2	90	90	0	NA	3	NA	3	2022-03-08	0	90
7	IMPORTA-1160	1	2022-09-09	Zachariah Mabor Nyinypiu	Yirol Hospital	3	2021-12-06	34	Adior	Married Monogamous	2	Housewife	1	4		44620	28	2	Known Pos on ART	2	2 visits	2	2			Live Birth-LB	1	New on ART -- in pregnancy	2	2015-07-08	1c = TDF/3TC/DTG	3		2021-12-06	Pregnant	2022-03-28	112	3-5 months	2	90	90	0	No	2	NA	3	2022-03-28	0	112
8	IMPORTA-1161	1	2022-09-09	Zachariah Mabor Nyinypiu	Yirol Hospital	3	2021-12-06	18	Tingajieth	Married Monogamous	2	Housewife	1	1	1	44550			Newly tested at ANC	1	1 visit	1	1			Live Birth-LB	1	Already on ART	1	2021-12-06	1c = TDF/3TC/DTG	3		2021-12-06	Pregnant	2022-03-03	87	<3 months	1	180	90	90	No	2	NA	3		44623
9	IMPORTA-1162	1	2022-09-09	Zachariah Mabor Nyinypiu	Yirol Hospital	3	2021-12-02	28	Matar	Married Monogamous	2	Housewife	1		5	44714	12	1	Newly tested at ANC	1	2 visits	2	2	At Health Facility	1	Live Birth-LB	1	Already on ART	1	2021-12-02	1c = TDF/3TC/DTG	3		2021-12-02	Pregnant	2022-03-23	111	3-5 months	2	111	90	21	No	2	NA	3	2022-03-23	0	111
10	IMPORTA-1163	1	2022-09-09	Zachariah Mabor Nyinypiu	Yirol Hospital	3	2021-11-30	28	Matar	Married Monogamous	2	Housewife	1	1	1	44679	16	2	Newly tested at ANC	1	1 visit	1	1	At Health Facility	1	Live Birth-LB	1	New on ART -- in pregnancy	2	2021-11-30	1c = TDF/3TC/DTG	3		2021-11-30	Pregnant	2022-04-01	122	3-5 months	2	150	90	60	Yes	1	Suppressed	1		44652
11	IMPORTA-1164	1	2022-09-09	Zachariah Mabor Nyinypiu	Yirol Hospital	3	2021-11-26	19	Mitinyin	Married Monogamous	2	Housewife	1	1	1	44652	16	2	Newly tested at ANC	1	2 visits	2	2			Live Birth-LB	1	New on ART -- in pregnancy	2	2021-11-26	1c = TDF/3TC/DTG	3		2021-11-26	Pregnant	2022-02-26	92	3-5 months	2	90	90	0	Yes	1	Suppressed	1	2022-02-26	0	92
12	IMPORTA-1165	1	2022-09-09	Zachariah Mabor Nyinypiu	Yirol Hospital	3	2021-11-25	21	Ngop	Married Monogamous	2	Housewife	1	1		44652	16	2	Newly tested at ANC	1	1 visit	1	1			Live Birth-LB	1	New on ART -- in pregnancy	2	2021-11-25	1c = TDF/3TC/DTG	3		2021-11-25	Pregnant	2022-05-19	175	3-5 months	2	150	90	60	No	2	NA	3		44700
19	IMPORTA-1167	1	2022-09-10	Zachariah Mabor Nyinypiu	Yirol Hospital	3	2021-11-19	19	Malakia	Married Monogamous	2	Housewife	1	1		44562	32	2	Newly tested at ANC	1	1 visit	1	1	At Health Facility	1	Live Birth-LB	1	New on ART -- in pregnancy	2	2021-11-19	1c = TDF/3TC/DTG	3		2021-11-19	Pregnant	2022-05-30	192	6+ months	3	191	180	11	Yes	1	Suppressed	1		44711
16	IMPORTA-1169	1	2022-09-09	Zachariah Mabor Nyinypiu	Yirol Hospital	3	2021-11-08	18	Mathar	Married Monogamous	2	Housewife	1		1	44713	8	1	Newly tested at ANC	1	2 visits	2	2	At Health Facility	1	Live Birth-LB	1	New on ART -- in pregnancy	2	2021-11-08	1c = TDF/3TC/DTG	3		2021-11-08	Pregnant	2022-01-08	61	<3 months	1	90	90	0	No	2	NA	3	2022-01-08	0	61
17	IMPORTA-1170	1	2022-09-10	Zachariah Mabor Nyinypiu	Yirol Hospital	3	2021-11-02	38	Rienftheen	Married Polygamous	2	Housewife	1	4	1	44774	4	1	Newly tested at ANC	1	2 visits	2	2	At Health Facility	1					2021-11-02	1f = TDF/3TC/EFV	6		2021-11-02	Pregnant	2022-01-02	61	<3 months	1	60	60	0	No	2	NA	3	2022-01-02	0	61
18	IMPORTA-1171	1	2022-09-10	Zachariah Mabor Nyinypiu	Yirol Hospital	3	2021-11-01	26	Panget	Married Monogamous	2	Housewife	1	3		44593			Newly tested at ANC	1	1 visit	1	1	At home	2	Live Birth-LB	1	New on ART -- in pregnancy	2	2021-11-01	1c = TDF/3TC/DTG	3		2021-11-01	Pregnant	2022-05-19	199	6+ months	3	198	180	18	Yes	1	Suppressed	1		44700
19	IMPORTA-1172	1	2022-09-10	Zachariah Mabor Nyinypiu	Yirol Hospital	3	2021-10-21	21	Alerwei	Married Monogamous	2	Housewife	1		2	44501	40	2	Newly tested at ANC	1	1 visit	1	1	At Health Facility	1			New on ART -- in pregnancy	2	2021-10-21	1c = TDF/3TC/DTG	3		2021-10-21	Pregnant	2022-04-05	166	3-5 months	2	180	180	0	Yes	1	Suppressed	1		44656
20	IMPORTA-1173	1	2022-09-10	Zachariah Mabor Nyinypiu	Yirol Hospital	3	2021-10-20	19	Pirchok	Married Monogamous	2	Housewife	1	1		44682	8	1	Newly tested at ANC	1	2 visits	2	2	At Health Facility	1	Live Birth-LB	1	New on ART -- in pregnancy	2	2021-10-20	1c = TDF/3TC/DTG	3		2021-10-20	Pregnant	2022-01-20	92	3-5 months	2	90	90	0	No	2	NA	3	2022-01-20	0	92
21	IMPORTA-1174	1	2022-09-10	Zachariah Mabor Nyinypiu	Yirol Hospital	3	2021-10-20	19	Biling	Married Monogamous	2	Housewife	1	1	1	44562	32	2	Newly tested at ANC	1	1 visit	1	1	At Health Facility	1	Live Birth-LB	1	New on ART -- in pregnancy	2		1c = TDF/3TC/DTG	3		2021-10-20	Pregnant	2022-04-26	188	6+ months	3	186	180	6	Yes	1	Unsuppressed	2		44677
22	IMPORTA-1175	1	2022-09-10	Zachariah Mabor Nyinypiu	Yirol Hospital	3	2021-09-02	32	Amethic	Married Polygamous	2	Housewife	1		5	44531	24	2	Newly tested at ANC	1	1 visit	1	1			Live Birth-LB	1	New on ART -- in pregnancy	2	2021-09-02	1c = TDF/3TC/DTG	3		2021-09-02	Pregnant	2022-03-28	207	6+ months	3	206	180	26	Yes	1	Unsuppressed	2		44648
23	IMPORTA-1176	1	2022-09-10	Zachariah Mabor Nyinypiu	Yirol Hospital	3	2021-09-01	28	Mading	Married Monogamous	2	Housewife	1	2	3		38	2	Newly tested at ANC	1	1 visit	1	1	At home	2	Live Birth-LB	1	New on ART -- in pregnancy	2		1c = TDF/3TC/DTG	3		2021-09-01	Pregnant	2022-03-28	208	6+ months	3	207	180	27	No	2	NA	3		44648
24	IMPORTA-1177	1	2022-09-08	Zachariah Mabor Nyinypiu	Yirol Hospital	3	2021-10-07	25	Burtit	Married Monogamous	2	Housewife	1	2	3	44593	24	2	Known Pos on ART	2	1 visit	1	1			Live Birth-LB	1	Already on ART	1	2021-07-16	1c = TDF/3TC/DTG	3		2021-10-07	Pregnant	2022-04-27	202	6+ months	3	200	180	20	Yes	1	Suppressed	1		44678
25	IMPORTA-1178	1	2022-09-08	Zachariah Mabor Nyinypiu	Yirol Hospital	3	2021-09-29	32	Majokcidhip	Married Monogamous	2	Housewife	1	2		44593			Newly tested at ANC	1	1 visit	1	1			Live Birth-LB	1	New on ART -- in pregnancy	2	2015-04-04	1c = TDF/3TC/DTG	3		2021-09-29	Pregnant	2022-04-06	189	6+ months	3	217	180	37	Yes	1	Suppressed	1		44657
26	IMPORTA-1179	1	2022-09-08	Zachariah Mabor Nyinypiu	Yirol Hospital	3	2021-09-29	30	Nniaramuou	Married Monogamous	2	Housewife	1	3		44621	12	1	Known Pos on ART	2	1 visit	1	1	At home	2	Live Birth-LB	1	Already on ART	1	2020-10-28	1c = TDF/3TC/DTG	3		2021-09-29	Pregnant	2022-04-25	208	6+ months	3	210	90	120	No	2	NA	3		44676
27	IMPORTA-1180	1	2022-09-08	Zachariah Mabor Nyinypiu	Yirol Hospital	3	2021-09-24	33	Malolo	Married Monogamous	2	Housewife	1	5	6	44593			Known Pos on ART	2	1 visit	1	1	At Health Facility	1	Live Birth-LB	1	Already on ART	1	2018-12-17	1c = TDF/3TC/DTG	3		2021-09-24	Pregnant	2022-04-25	213	6+ months	3	211	180	31	Yes	1	Suppressed	1		44676
28	IMPORTA-1181	1	2022-09-08	Zachariah Mabor Nyinypiu	Yirol Hospital	3	2021-09-21	21	Betoi	Married Monogamous	2	Housewife	1		4	44531	29	2	Known Pos on ART	2	1 visit	1	1	At Health Facility	1	Live Birth-LB	1			2020-03-09	1c = TDF/3TC/DTG	3		2021-09-21	Pregnant	2022-04-29	220	6+ months	3	217	180	37	Yes	1	Unsuppressed	2		44680
29	IMPORTA-1182	1	2022-09-08	Zachariah Mabor Nyinypiu	Yirol Hospital	3	2021-09-16	25	Matar	Married Polygamous	2	Housewife	1	4		44531	20	2	Newly tested at ANC	1	2 visits	2	2	At home	2	Live Birth-LB	1	New on ART -- in pregnancy	2	2021-09-16	1c = TDF/3TC/DTG	3		2021-09-16	Pregnant	2022-07-28	315	6+ months	3	270	180	90	Yes	1	Unsuppressed	2		44770
31	IMPORTA-1184	1	2022-09-07	Zachariah Mabor Nyinypiu	Yirol Hospital	3	2021-08-03	30	Panekar	Married Monogamous	2	Housewife	1		4	44501	24	2	Known Pos on ART	2	1 visit	1	1	At home	2	Live Birth-LB	1			2019-11-11	1c = TDF/3TC/DTG	3		2021-08-03	Pregnant	2022-02-16	197	6+ months	3	193	180	13	Yes	1	Unsuppressed	2		44608
32	IMPORTA-1185	1	2022-08-04	Zachariah Mabor Nyinypiu	Yirol Hospital	3	2021-08-03	37	Atorok	Married Monogamous	2	Housewife	1	4	4	44621	4	1	Known Pos on ART	2	2 visits	2	2	At Health Facility	1	Live Birth-LB	1	Already on ART	1	2021-08-03	1c = TDF/3TC/DTG	3		2021-08-03	Pregnant	2021-11-08	97	3-5 months	2	95	90	5	No	2	NA	3	2021-11-08	0	97
33	IMPORTA-1186	1	2022-09-07	Zachariah Mabor Nyinypiu	Yirol Hospital	3	2021-08-02	28	Betoi	Married Monogamous	2	Housewife	1		4	44622	6	1	Newly tested at ANC	1	1 visit	1	1	At Health Facility	1	Live Birth-LB	1	New on ART -- in pregnancy	2		1c = TDF/3TC/DTG	3		2021-08-02	Pregnant	2022-01-23	174	3-5 months	2	111	90	21	No	2	NA	3	2022-01-23	0	174
34	IMPORTA-1187	1	2022-09-07	Zachariah Mabor Nyinypiu	Yirol Hospital	3	2021-07-15	26	Mathiir	Married Monogamous	2	Housewife	1	3	6	44593	4	1	Newly tested at ANC	1	2 visits	2	2	At Health Facility	1			New on ART -- in pregnancy	2	2021-07-15	1c = TDF/3TC/DTG	3		2021-07-15	Pregnant	2021-10-15	92	3-5 months	2	90	90	0	No	2	NA	3	2021-10-15	0	92
35	IMPORTA-1188	1	2022-09-06	Zachariah Mabor Nyinypiu	Yirol Hospital	3	2021-05-03	30	Mathiir	Married Monogamous	2	Housewife	1	1	4	44470	16	2	Newly tested at ANC	1	2 visits	2	2	At Health Facility	1	Live Birth-LB	1	New on ART -- in pregnancy	2	2021-05-03	1c = TDF/3TC/DTG	3		2021-05-03	Pregnant	2021-11-03	184	6+ months	3	180	180	0	Yes	1	Suppressed	1	2021-11-03	0	184
36	IMPORTA-1189	1	2022-09-05	Zachariah Mabor Nyinypiu	Yirol Hospital	3	2020-10-05	35	Atorok	Married Monogamous	2	Housewife	1	1	3		13	1	Newly tested at ANC	1	4 or more visits	4	3	At Health Facility	1	Live Birth-LB	1	New on ART -- in pregnancy	2	2020-10-05	1c = TDF/3TC/DTG	3		2020-10-05	Pregnant	2021-04-05	182	6+ months	3	180	180	0	No	2	NA	3	2011-08-11	-3525
37	IMPORTA-1190	1	2022-09-05	Zachariah Mabor Nyinypiu	Yirol Hospital	3	2020-10-22	22	Achior	Married Monogamous	2	Housewife	1	6	1		25	2	Newly tested at ANC	1	2 visits	2	2	At Health Facility	1	Live Birth-LB	1	New on ART -- in pregnancy	2	2020-10-22	1c = TDF/3TC/DTG	3		2021-05-22	Pregnant	2021-10-21	152	3-5 months	2	320	180	140	NA	3	NA	3		44490
38	IMPORTA-1191	1	2022-09-05	Zachariah Mabor Nyinypiu	Yirol Hospital	3	2020-11-11	29	Mun-gar	Married Monogamous	2	Housewife	1	2	3		31	2	Known Pos on ART	2	3 visits	3	3			Live Birth-LB	1	Already on ART	1	2021-11-11	1c = TDF/3TC/DTG	3		2020-11-11	Pregnant	2021-05-11	181	6+ months	3	180	180	0	NA	3	NA	3	2021-05-11	0	181
39	IMPORTA-1192	1	2022-09-05	Zachariah Mabor Nyinypiu	Yirol Hospital	3	2020-11-30	28	Majok Giohiop	Married Monogamous	2	Housewife	1	2					Newly tested at ANC	1	2 visits	2	2	At Health Facility	1	Live Birth-LB	1	New on ART -- in pregnancy	2	2020-11-30	1c = TDF/3TC/DTG	3		2020-11-30	Pregnant	2021-04-30	151	3-5 months	2	780	180	600	NA	3	NA	3		44316
40	IMPORTA-1193	1	2022-09-08	Zachariah Mabor Nyinypiu	Yirol Hospital	3	2020-12-08	21	Ngop	Married Monogamous	2	Housewife	1	2	2		18	2	Known Pos on ART	2	2 visits	2	2	At Health Facility	1	Live Birth-LB	1	Already on ART	1	2020-12-08	1c = TDF/3TC/DTG	3		2021-10-08	Breastfeeding	2022-04-23	197	6+ months	3	180	180	0	NA	3	NA	3		44674
41	IMPORTA-1194	1	2022-09-07	Zachariah Mabor Nyinypiu	Yirol Hospital	3	2020-07-23	22	Aramweer	Married Monogamous	2	Housewife	1	1					Newly tested at ANC	1	1 visit	1	1			Live Birth-LB	1	New on ART -- in pregnancy	2	2020-07-23	1f = TDF/3TC/EFV	6		2020-07-23	Pregnant	2021-01-23	184	6+ months	3	600	180	420	No	2	NA	3		44219
42	IMPORTA-1195	1	2022-09-07	Zachariah Mabor Nyinypiu	Yirol Hospital	3	2020-02-19	30	Molek	Married Monogamous	2	Housewife	1	1	2		28	2	Newly tested at ANC	1	1 visit	1	1	At Health Facility	1	Live Birth-LB	1	New on ART -- in pregnancy	2	2020-02-19	1c = TDF/3TC/DTG	3		2020-02-19	Pregnant	2020-05-12	83	<3 months	1	290	90	200	No	2	NA	3		43963
43	IMPORTA-1196	1	2022-09-07	Zachariah Mabor Nyinypiu	Yirol Hospital	3	2020-02-17	20	Yirol Town	Married Monogamous	2	Housewife	1	2	3		4	1	Newly tested at ANC	1	1 visit	1	1			Live Birth-LB	1	New on ART -- in pregnancy	2	2020-02-17	1c = TDF/3TC/DTG	3		2020-02-17	Pregnant	2020-07-17	151	3-5 months	2	780	90	690	No	2	NA	3		44029
44	IMPORTA-1197	1	2022-09-07	Zachariah Mabor Nyinypiu	Yirol Hospital	3	2020-02-14	30	Alorok	Married Monogamous	2	Housewife	1						Newly tested at ANC	1	1 visit	1	1	At Health Facility	1	Live Birth-LB	1	New on ART -- in pregnancy	2	2020-02-14	1c = TDF/3TC/DTG	3		2020-02-14	Pregnant	2020-05-15	91	3-5 months	2	90	90	0	No	2	NA	3	2020-05-15	0	91
45	IMPORTA-1198	1	2022-09-07	Zachariah Mabor Nyinypiu	Yirol Hospital	3	2020-02-14	30	Atorok	Married Monogamous	2	Housewife	1	1			8	1	Newly tested at ANC	1	2 visits	2	2	At Health Facility	1			Already on ART	1	2020-02-14	1c = TDF/3TC/DTG	3		2020-02-14	Pregnant	2020-05-15	91	3-5 months	2	90	90	0	No	2	NA	3	2020-05-15	0	91
46	IMPORTA-1199	1	2022-09-07	Zachariah Mabor Nyinypiu	Yirol Hospital	3	2020-01-15	34	Watacabath	Married Monogamous	2	Housewife	1	1	2				Newly tested at ANC	1	2 visits	2	2	At Health Facility	1	Live Birth-LB	1			2020-05-15	1c = TDF/3TC/DTG	3		2020-01-15	Pregnant	2020-04-16	92	3-5 months	2	90	90	0	No	2	NA	3	2020-04-16	0	92
47	IMPORTA-1200	1	2022-09-07	Zachariah Mabor Nyinypiu	Yirol Hospital	3	2019-12-30	32	Atorok	Married Monogamous	2	Housewife	1		3		9	1	Newly tested at ANC	1	2 visits	2	2	At Health Facility	1			Already on ART	1	2019-12-30	1c = TDF/3TC/DTG	3		2019-12-30	Pregnant	2020-03-30	91	3-5 months	2	620	90	530	No	2	NA	3		43920
48	IMPORTA-1201	1	2022-09-07	Zachariah Mabor Nyinypiu	Yirol Hospital	3	2019-12-20	25	Magong	Married Monogamous	2	Housewife	1	2			11	1	Newly tested at ANC	1	2 visits	2	2	At Health Facility	1	Live Birth-LB	1	New on ART -- in pregnancy	2	2019-12-20	1c = TDF/3TC/DTG	3		2019-12-20	Pregnant	2020-05-20	152	3-5 months	2	90	90	0	No	2	NA	3	2020-03-20	-61	91
49	IMPORTA-1202	1	2022-09-07	Zachariah Mabor Nyinypiu	Yirol Hospital	3	2019-12-20	28	Adior	Married Monogamous	2	Housewife	1	1	2		28	2	Newly tested at ANC	1	1 visit	1	1	At Health Facility	1	Live Birth-LB	1	Already on ART	1	2019-12-20	1c = TDF/3TC/DTG	3		2019-12-20	Pregnant	2020-05-20	152	3-5 months	2	90	90	0	No	2	NA	3		43971
50	IMPORTA-1203	1	2022-09-07	Zachariah Mabor Nyinypiu	Yirol Hospital	3	2019-12-20	20	Mayong	Married Monogamous	2	Housewife	1	1	1		15	1	Known Pos on ART	2	1 visit	1	1	At Health Facility	1	Live Birth-LB	1	New on ART -- in pregnancy	2	2019-12-20	1c = TDF/3TC/DTG	3		2019-12-20	Pregnant	2020-03-20	91	3-5 months	2	900	90	810	NA	3	NA	3		43910
51	IMPORTA-1204	1	2022-09-07	Zachariah Mabor Nyinypiu	Yirol Hospital	3	2019-12-19	19	Kaap	Married Monogamous	2	Housewife	1		1		8	1	Newly tested at ANC	1	1 visit	1	1	At Health Facility	1			New on ART -- in pregnancy	2	2019-12-19	1c = TDF/3TC/DTG	3		2019-12-19	Pregnant	2020-03-19	91	3-5 months	2	90	90	0	No	2	NA	3	2020-03-19	0	91
52	IMPORTA-1205	1	2022-09-07	Zachariah Mabor Nyinypiu	Yirol Hospital	3	2019-12-07	19	Buluk	Married Monogamous	2	Housewife	1		1		8	1	Known Pos on ART	2	2 visits	2	2	At Health Facility	1	Live Birth-LB	1	Already on ART	1	2019-10-31	1c = TDF/3TC/DTG	3		2019-10-31	Pregnant	2020-04-30	182	6+ months	3	270	180	90	Yes	1	Unsuppressed	2		43951
53	IMPORTA-1206	1	2022-09-06	Zachariah Mabor Nyinypiu	Yirol Hospital	3	2021-05-27	30	Lokakedu	Married Monogamous	2	Housewife	1	1	2	44317	36	2	Newly tested at ANC	1	2 visits	2	2			Live Birth-LB	1	New on ART -- in pregnancy	2	2021-05-27	1c = TDF/3TC/DTG	3		2021-05-27	Pregnant	2021-11-29	186	6+ months	3	180	180	0	NA	3	NA	3	2021-11-29	0	186
54	IMPORTA-1207	1	2022-09-07	Zachariah Mabor Nyinypiu	Yirol Hospital	3	2019-10-30	30	Mityingin	Married Monogamous	2	Housewife	1	1	1	43916			Newly tested at ANC	1	2 visits	2	2	At Health Facility	1	Live Birth-LB	1	New on ART -- in pregnancy	2	2019-10-30	1c = TDF/3TC/DTG	3		2019-10-30	Pregnant	2020-01-30	92	3-5 months	2	180	90	90	No	2	NA	3		43860
55	IMPORTA-1208	1	2022-09-07	Zachariah Mabor Nyinypiu	Yirol Hospital	3	2019-11-28	34	Driol,wuthow	Married Monogamous	2	Housewife	1		1				Newly tested at ANC	1	1 visit	1	1			Live Birth-LB	1	New on ART -- in pregnancy	2	2019-11-28	1f = TDF/3TC/EFV	6		2019-11-28	Breastfeeding	2019-12-01	3	<3 months	1	30	180	-150	No	2	NA	3		43800
56	IMPORTA-1209	1	2022-09-07	Zachariah Mabor Nyinypiu	Yirol Hospital	3	2020-01-08	19	Matar	Single (never married)	1	Student	1		1	44392	12	1	Newly tested at ANC	1	1 visit	1	1	At Health Facility	1	Live Birth-LB	1	New on ART -- in pregnancy	2	2020-01-08	1c = TDF/3TC/DTG	3		2021-01-08	Pregnant	2021-07-05	178	3-5 months	2	780	180	600	No	2	NA	3		44382
58	IMPORTA-1211	1	2022-05-07	Zachariah Mabor Nyinypiu	Yirol Hospital	3	2019-11-11	24	Nyong	Married Monogamous	2	Housewife	1	1	2		9	1	Known Pos on ART	2	2 visits	2	2	At home	2	Live Birth-LB	1	Already on ART	1	2019-11-11	1c = TDF/3TC/DTG	3		2019-11-11	Pregnant	2020-02-11	92	3-5 months	2	90	90	0	NA	3	NA	3	2020-02-11	0	92
59	IMPORTA-1212	1	2022-09-07	Zachariah Mabor Nyinypiu	Yirol Hospital	3	2019-11-11	17	Matar	Single (never married)	1	Unemployed	1	1	1		20	2	Newly tested at ANC	1	2 visits	2	2	At Health Facility	1	Live Birth-LB	1	New on ART -- in pregnancy	2	2019-11-11	1c = TDF/3TC/DTG	3		2019-11-11	Pregnant	2020-02-11	92	3-5 months	2	90	90	0	Yes	1	Unsuppressed	2	2020-02-01	-10	82
60	IMPORTA-1213	1	2022-09-07	Zachariah Mabor Nyinypiu	Yirol Hospital	3	2019-11-19	21	Wunthon	Married Monogamous	2	Housewife	1	1			20	2	Known Pos on ART	2	1 visit	1	1	At Health Facility	1	Live Birth-LB	1	New on ART -- in pregnancy	2		1c = TDF/3TC/DTG	3		2020-11-19	Pregnant	2020-02-19				900	90	810	No	2	NA	3		43880
61	IMPORTA-1214	1	2022-09-07	Zachariah Mabor Nyinypiu	Yirol Hospital	3	2019-11-28	21	Alerwei	Married Monogamous	2	Housewife	1	1	1		8	1	Newly tested at ANC	1	1 visit	1	1			Live Birth-LB	1			2019-11-28	1c = TDF/3TC/DTG	3		2019-11-28	Pregnant	2020-02-28	92	3-5 months	2	90	90	0	NA	3	NA	3	2020-02-28	0	92
62	IMPORTA-1215	1	2022-09-07	Zachariah Mabor Nyinypiu	Yirol Hospital	3	2019-12-02	29	Pankar	Married Monogamous	2	Housewife	1	1	3		8	1	Newly tested at ANC	1	2 visits	2	2	At Health Facility	1	Live Birth-LB	1	New on ART -- in pregnancy	2	2019-12-02	1c = TDF/3TC/DTG	3		2019-12-02	Pregnant	2020-03-02	91	3-5 months	2	870	90	780	NA	3	NA	3		43892
63	IMPORTA-1216	1	2022-09-07	Zachariah Mabor Nyinypiu	Yirol Hospital	3	2019-12-17	29	Kelwon	Married Monogamous	2	Housewife	1	2	3	43816			Newly tested at ANC	1	2 visits	2	2	At Health Facility	1			New on ART -- in pregnancy	2	2019-12-17	1c = TDF/3TC/DTG	3		2019-12-17	Pregnant	2020-03-17	91	3-5 months	2	90	90	0	NA	3	NA	3	2020-03-17	0	91
64	IMPORTA-1217	1	2022-09-07	Zachariah Mabor Nyinypiu	Yirol Hospital	3	2019-12-18	36	Malakia	Married Monogamous	2	Housewife	1	2	3				Newly tested at ANC	1	2 visits	2	2	At Health Facility	1	Live Birth-LB	1	New on ART -- in pregnancy	2	2019-12-18	1c = TDF/3TC/DTG	3		2019-12-18	Pregnant	2020-03-18	91	3-5 months	2	90	90	0	NA	3	NA	3	2020-03-18	0	91
65	IMPORTA-1218	1	2022-09-07	Zachariah Mabor Nyinypiu	Yirol Hospital	3	2019-12-18	16	Araau	Married Monogamous	2	Housewife	1	1	1		20	2	Newly tested at ANC	1	1 visit	1	1	At Health Facility	1	Live Birth-LB	1	New on ART -- in pregnancy	2		1c = TDF/3TC/DTG	3		2019-12-18	Pregnant	2020-03-18	91	3-5 months	2	900	90	810	No	2	NA	3		43908
66	IMPORTA-1219	1	2022-09-06	Zachariah Mabor Nyinypiu	Yirol Hospital	3	2021-06-29	30	Ngop	Married Monogamous	2	Housewife	1	5	1	44501	16	2	Known Pos on ART	2	1 visit	1	1			Live Birth-LB	1	New on ART -- in pregnancy	2	2015-05-15	1c = TDF/3TC/DTG	3		2021-06-29	Pregnant	2022-05-31	336	6+ months	3	300	180	120	No	2	NA	3		44712
67	IMPORTA-1220	1	2022-09-06	Zachariah Mabor Nyinypiu	Yirol Hospital	3	2021-06-07	28	Benye	Married Monogamous	2	Housewife	1		2	44531	8	1	Newly tested at ANC	1	1 visit	1	1	At Health Facility	1			New on ART -- in pregnancy	2	2021-06-07	1c = TDF/3TC/DTG	3		2021-06-07	Pregnant	2022-03-25	291	6+ months	3	420	90	330	No	2	NA	3		44645
68	IMPORTA-1221	1	2022-09-06	Zachariah Mabor Nyinypiu	Yirol Hospital	3	2021-05-12	22	Alerwei	Married Polygamous	2	Housewife	1	3	3		7	1	Known Pos on ART	2	1 visit	1	1	At Health Facility	1	Live Birth-LB	1	Already on ART	1		1c = TDF/3TC/DTG	3		2021-05-12	Pregnant	2022-04-18	341	6+ months	3	300	180	120	NA	3	NA	3		44669
69	IMPORTA-1222	1	2022-09-06	Zachariah Mabor Nyinypiu	Yirol Hospital	3	2021-05-11	35	Lualngem	Married Monogamous	2	Housewife	1		2	44348	36	2	Known Pos on ART	2	2 visits	2	2	At home	2			Already on ART	1	2016-07-21	1c = TDF/3TC/DTG	3		2021-05-11	Pregnant	2021-12-02	205	6+ months	3	201	180	21	No	2	NA	3	2021-12-02	0	205
70	IMPORTA-1223	1	2022-09-07	Zachariah Mabor Nyinypiu	Yirol Hospital	3	2021-05-11	38	Wathok	Single (never married)	1	Housewife	1	1	1	44470	8	1	Known Pos on ART	2	2 visits	2	2	At home	2	Live Birth-LB	1	Already on ART	1	2015-02-19	1c = TDF/3TC/DTG	3		2021-05-11	Pregnant	2021-07-14	64	<3 months	1	93	90	3	No	2	NA	3	2021-07-14	0	64
[truncated: 304 more rows]
[truncated: 100 more columns]
